# Supplementary material
Source: PubMed Central journal article supplement (PMC4291805)

**Enantioselective Synthesis of (–)-Maoecrystal V by Enantiodetermining C–H  
Functionalization**

Ping Lu, Artur Mailyan, Zhenhua Gu, David M. Guptill, Hengbin Wang,  
Huw M. L. Davies and Armen Zakarian\*

Department of Chemistry, Emory University, 1515 Dickey Drive, Atlanta, GA 30322

Department of Chemistry and Biochemistry, University of California, Santa Barbara, CA 93106

**Supporting Information. Part 2**

Copies of  $^1\text{H}$ ,  $^{13}\text{C}$  NMR spectra, HPLC traces

7.260  
6.874  
6.857  
6.366  
6.349  
6.018

| Parameter              | Value               |
|------------------------|---------------------|
| Title                  | AKM-02-134          |
| Spectrometer           | inova               |
| Solvent                | CDCl3               |
| Temperature            | 20.0                |
| Number of Scans        | 16                  |
| Relaxation Delay       | 4.8000              |
| Acquisition Time       | 2.5001              |
| Acquisition Date       | 2014-04-19T21:12:53 |
| Spectrometer Frequency | 499.86              |

3.891  
3.719  
3.423  
2.328  
0.945

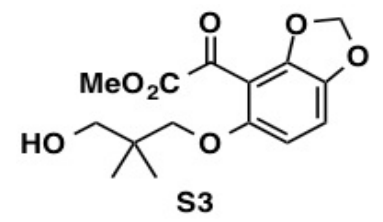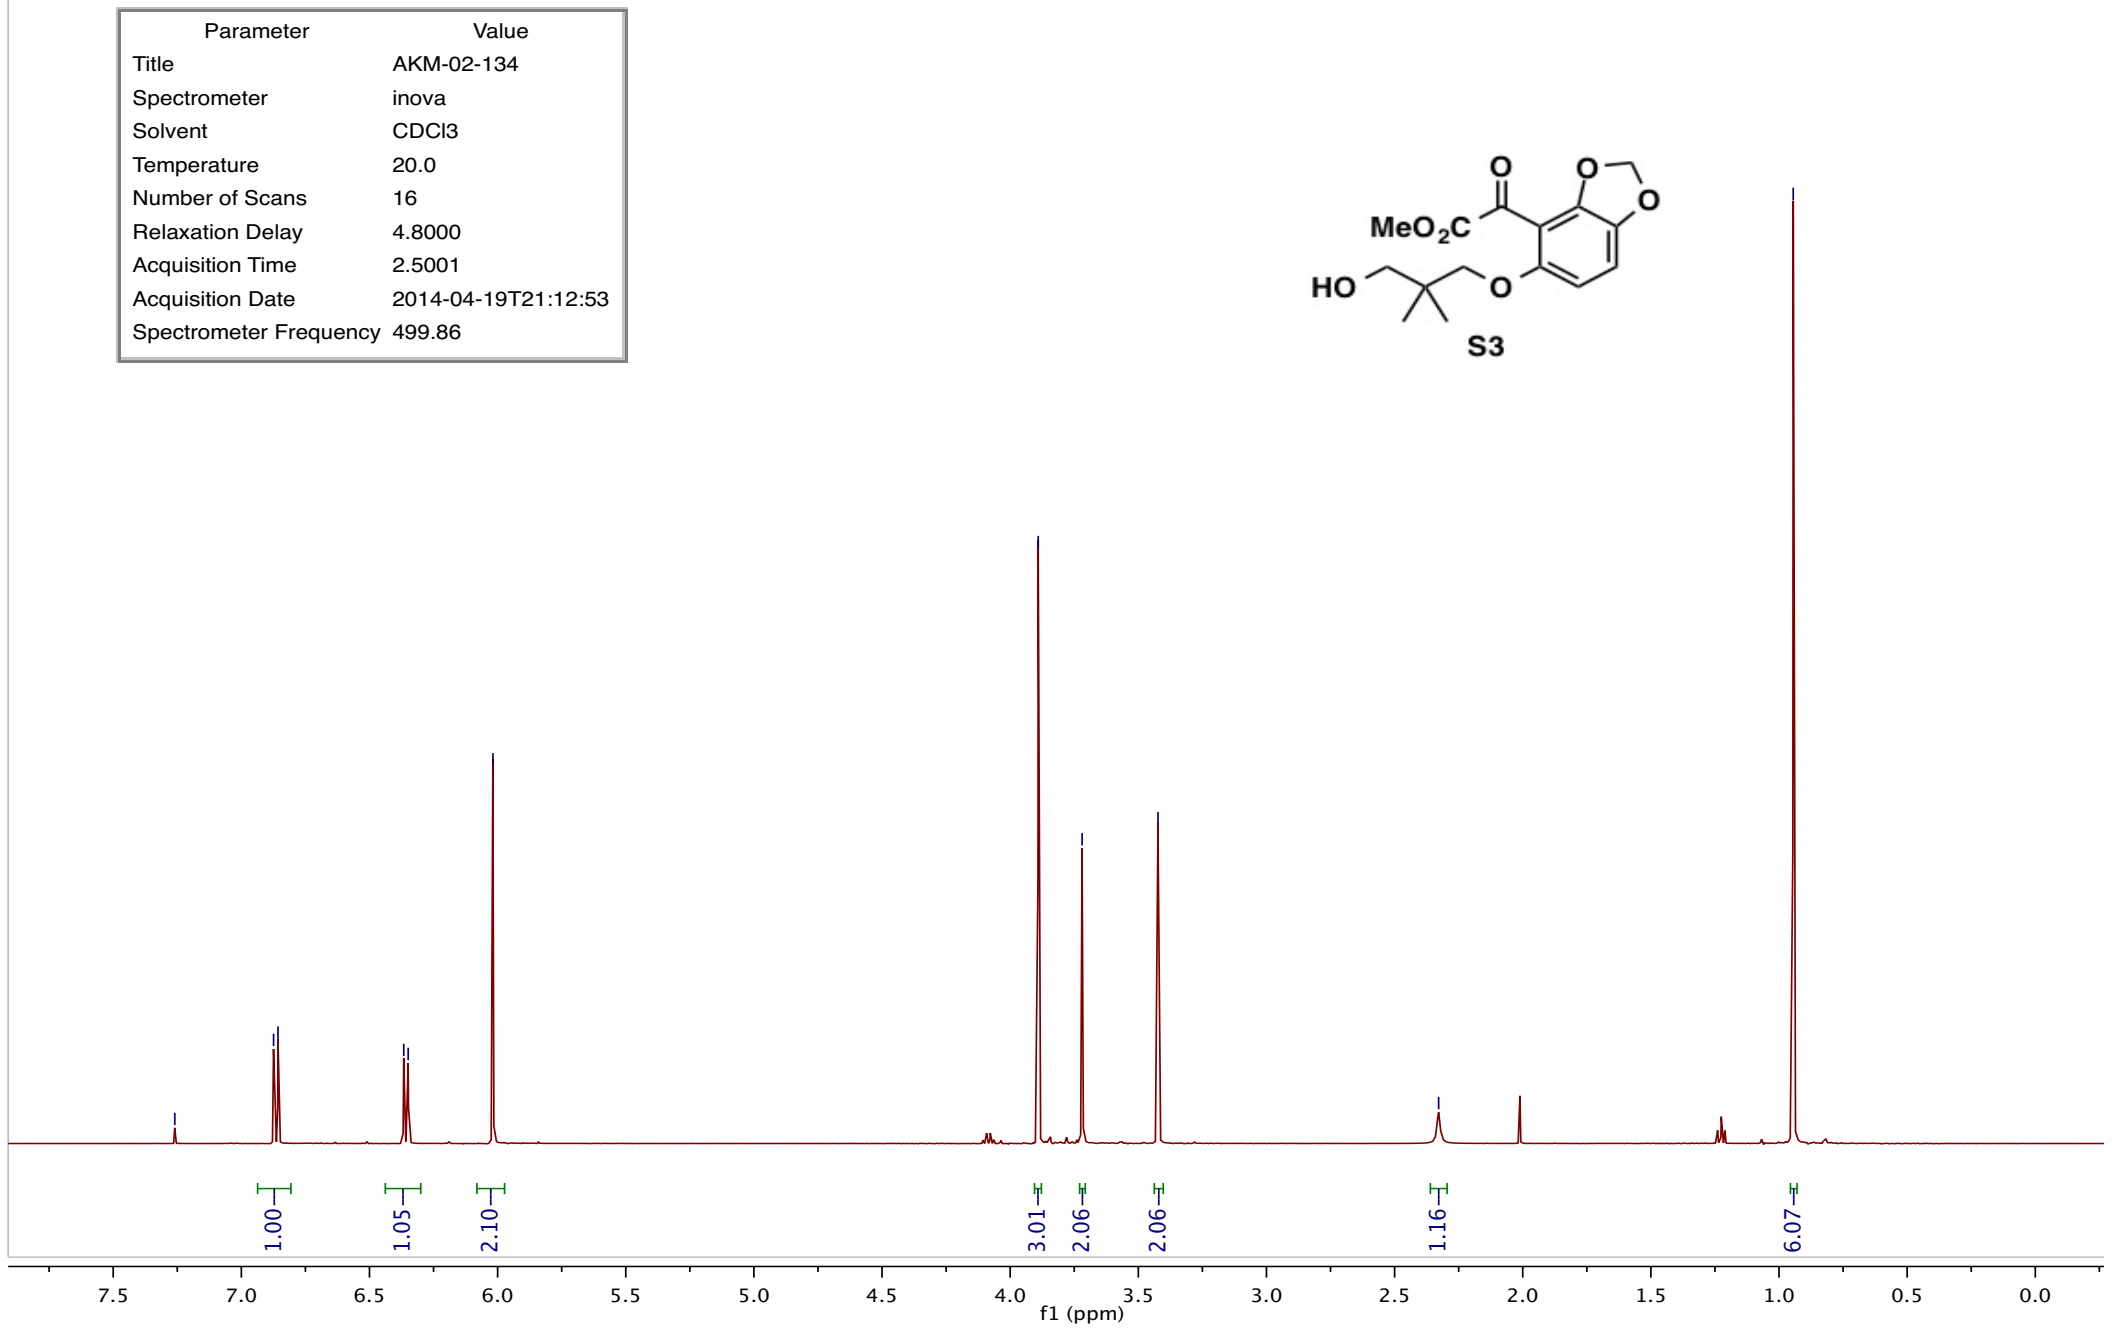

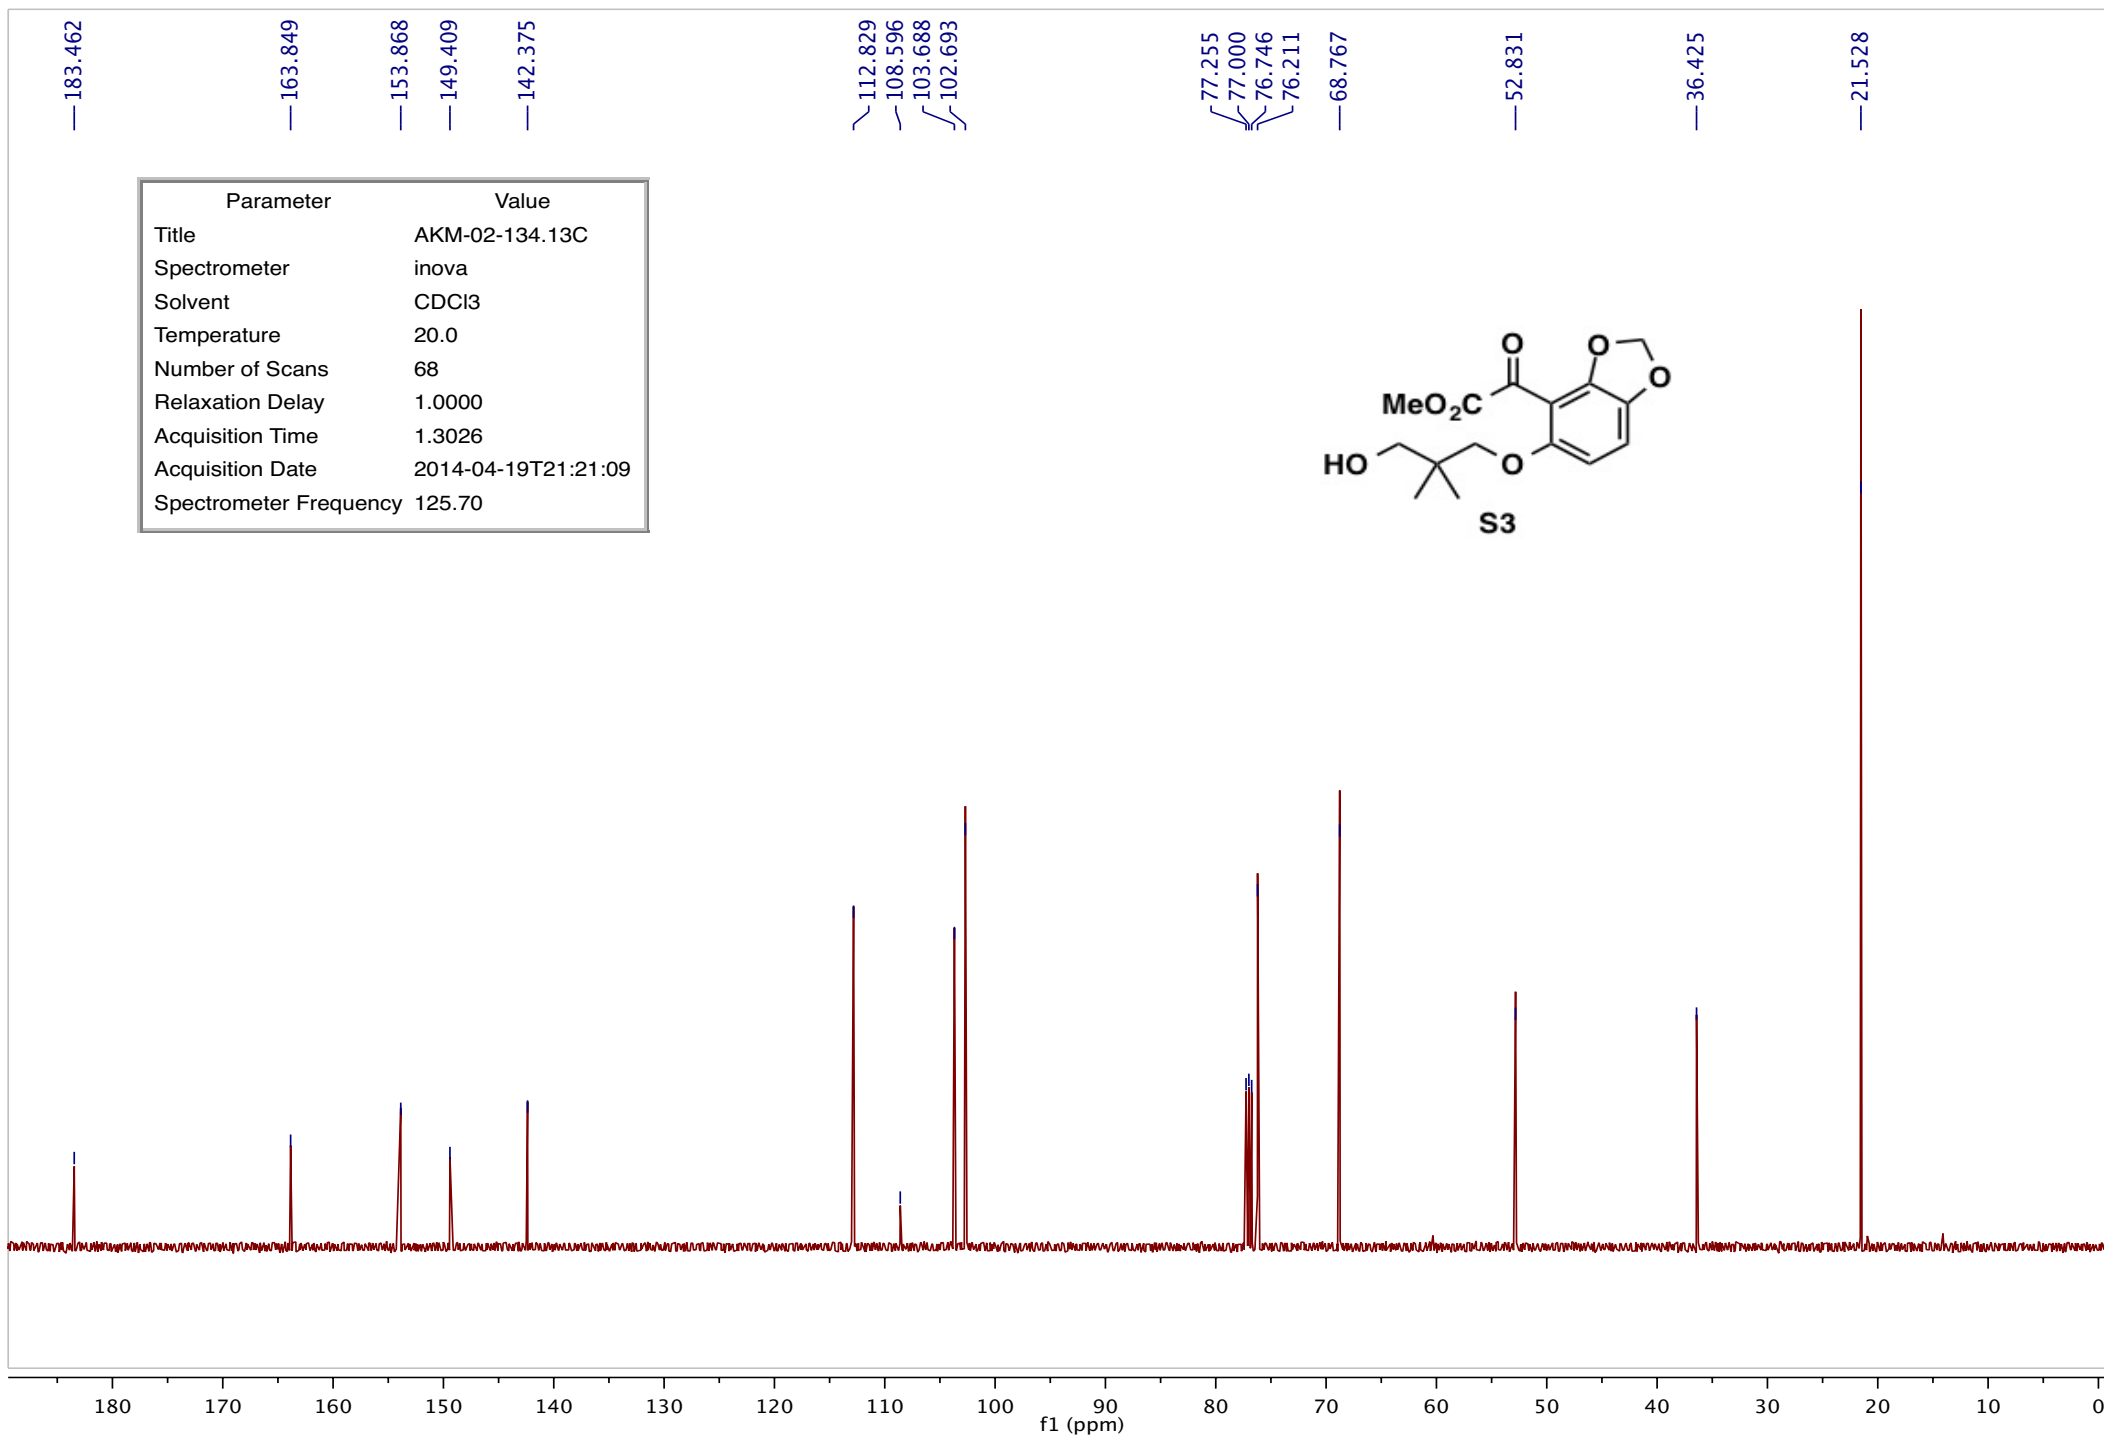

| Parameter              | Value               |
|------------------------|---------------------|
| Title                  | AKM-02-134.13C      |
| Spectrometer           | inova               |
| Solvent                | CDCl3               |
| Temperature            | 20.0                |
| Number of Scans        | 68                  |
| Relaxation Delay       | 1.0000              |
| Acquisition Time       | 1.3026              |
| Acquisition Date       | 2014-04-19T21:21:09 |
| Spectrometer Frequency | 125.70              |

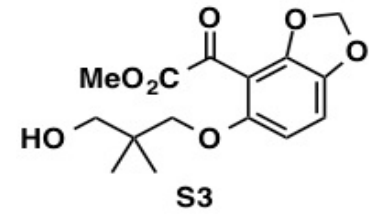

| Parameter              | Value               |
|------------------------|---------------------|
| Title                  | AKM-02-140          |
| Spectrometer           | inova               |
| Solvent                | CDCl3               |
| Temperature            | 20.0                |
| Number of Scans        | 8                   |
| Relaxation Delay       | 4.8000              |
| Acquisition Time       | 2.5001              |
| Acquisition Date       | 2014-04-22T23:19:16 |
| Spectrometer Frequency | 499.86              |

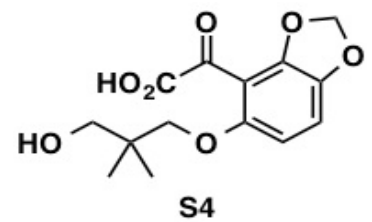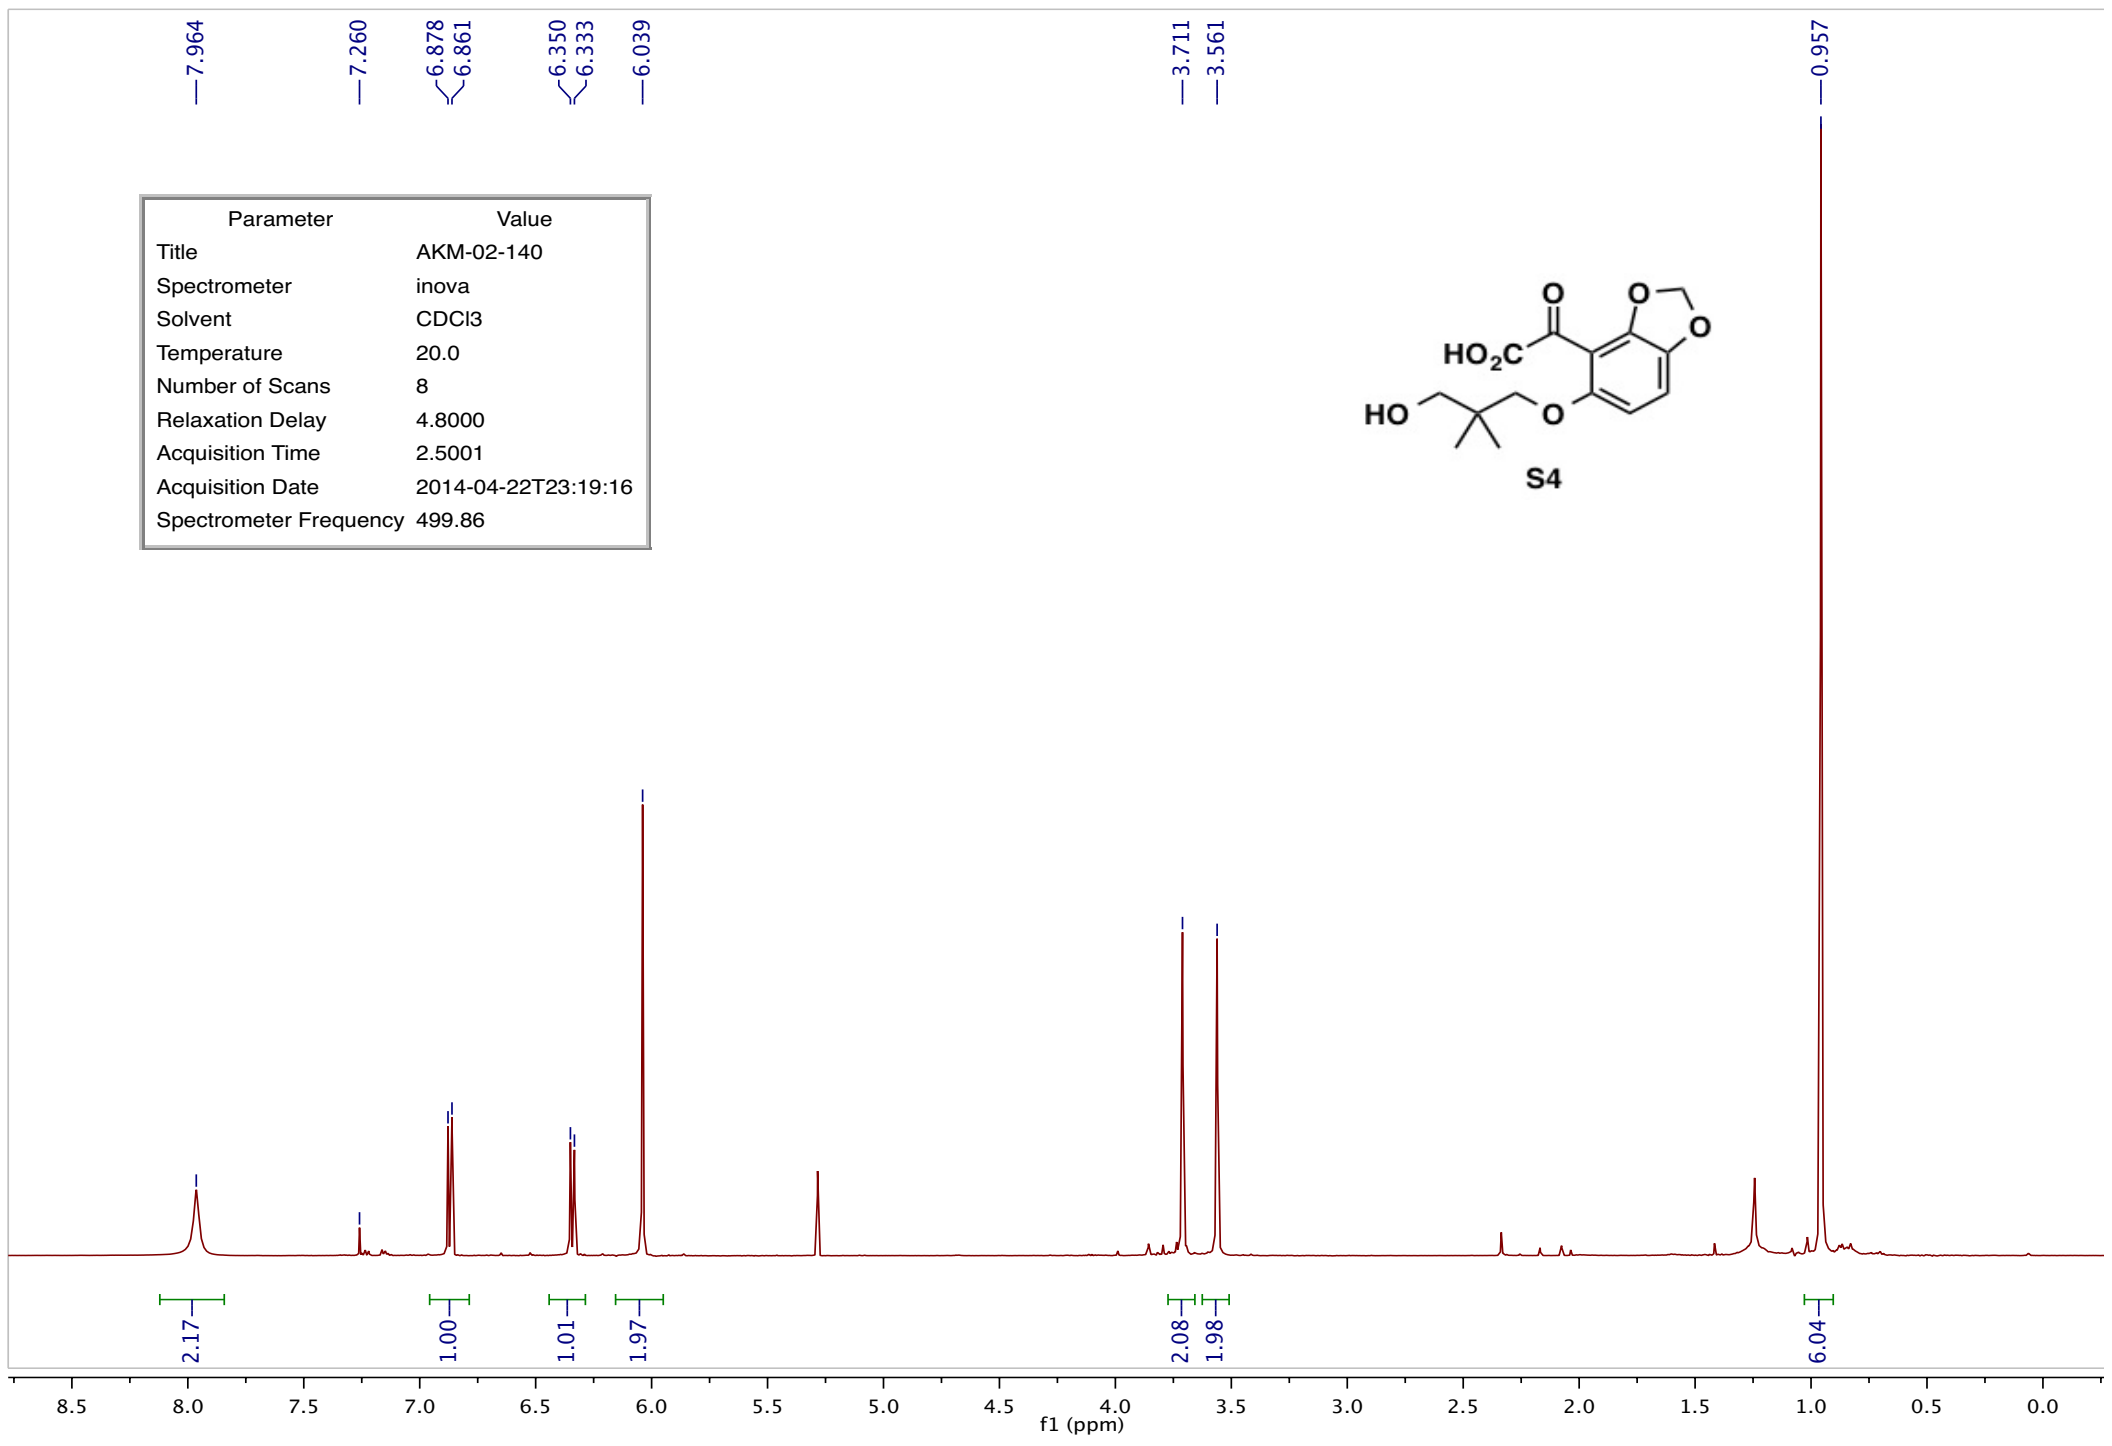

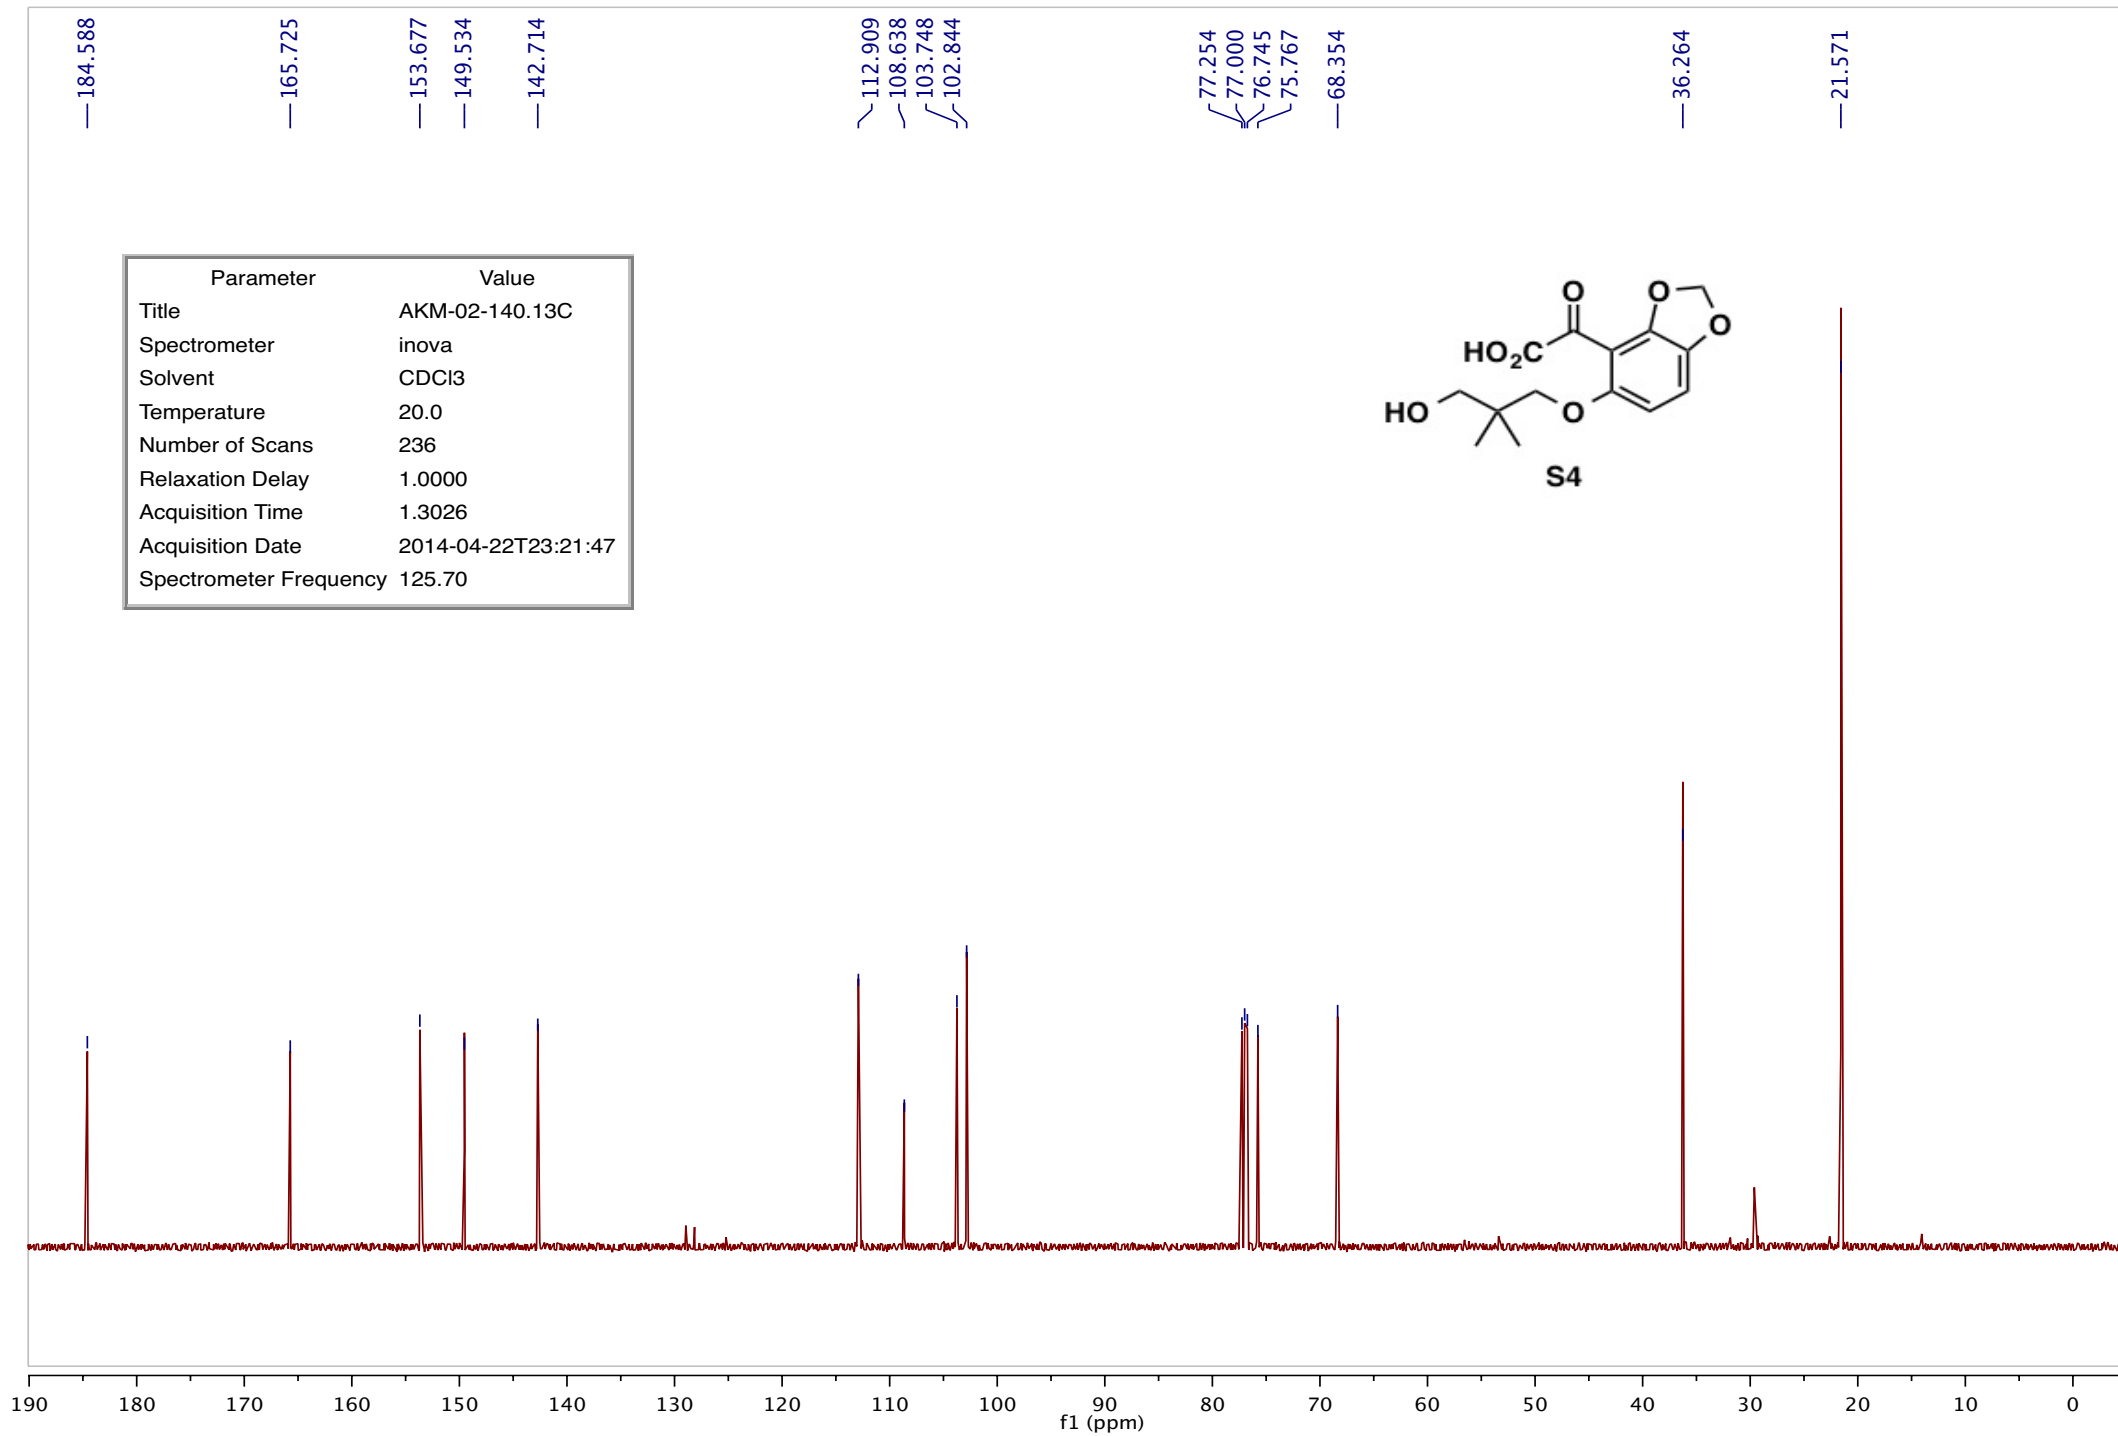

| Parameter              | Value               |
|------------------------|---------------------|
| Title                  | AKM-02-140.13C      |
| Spectrometer           | inova               |
| Solvent                | CDCl3               |
| Temperature            | 20.0                |
| Number of Scans        | 236                 |
| Relaxation Delay       | 1.0000              |
| Acquisition Time       | 1.3026              |
| Acquisition Date       | 2014-04-22T23:21:47 |
| Spectrometer Frequency | 125.70              |

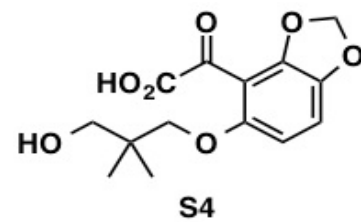

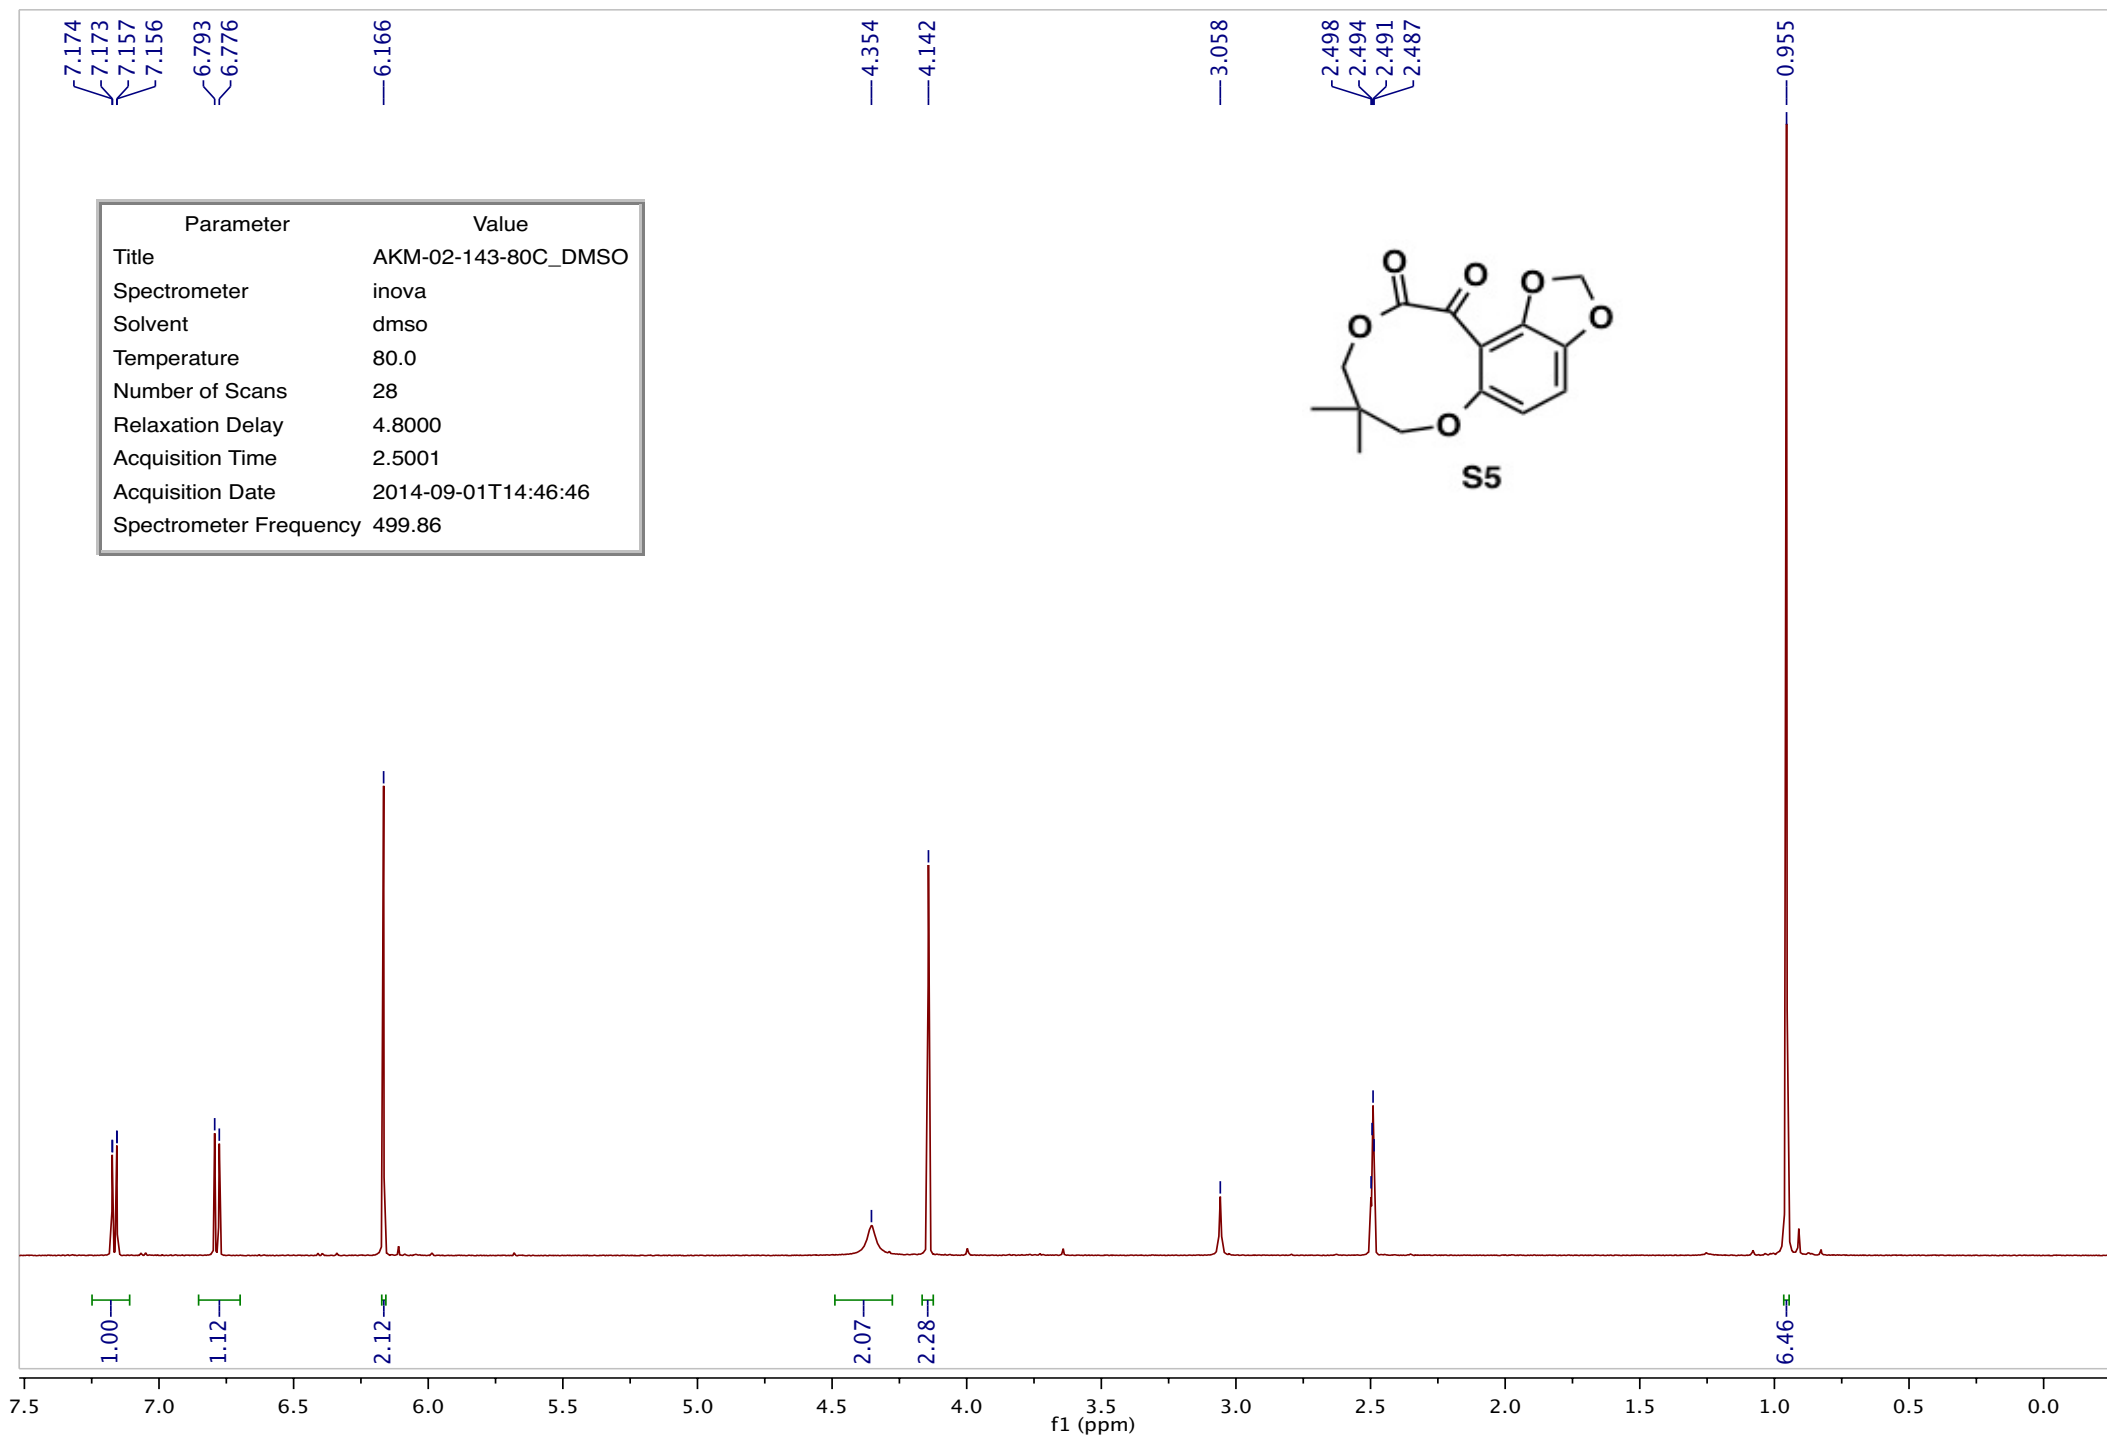

| Parameter              | Value               |
|------------------------|---------------------|
| Title                  | AKM-02-143.13C      |
| Spectrometer           | inova               |
| Solvent                | cdcl3               |
| Temperature            | 25.0                |
| Number of Scans        | 256                 |
| Relaxation Delay       | 1.0000              |
| Acquisition Time       | 1.2987              |
| Acquisition Date       | 2014-04-24T13:13:12 |
| Spectrometer Frequency | 150.79              |

compound **S3**

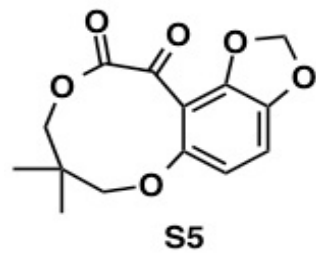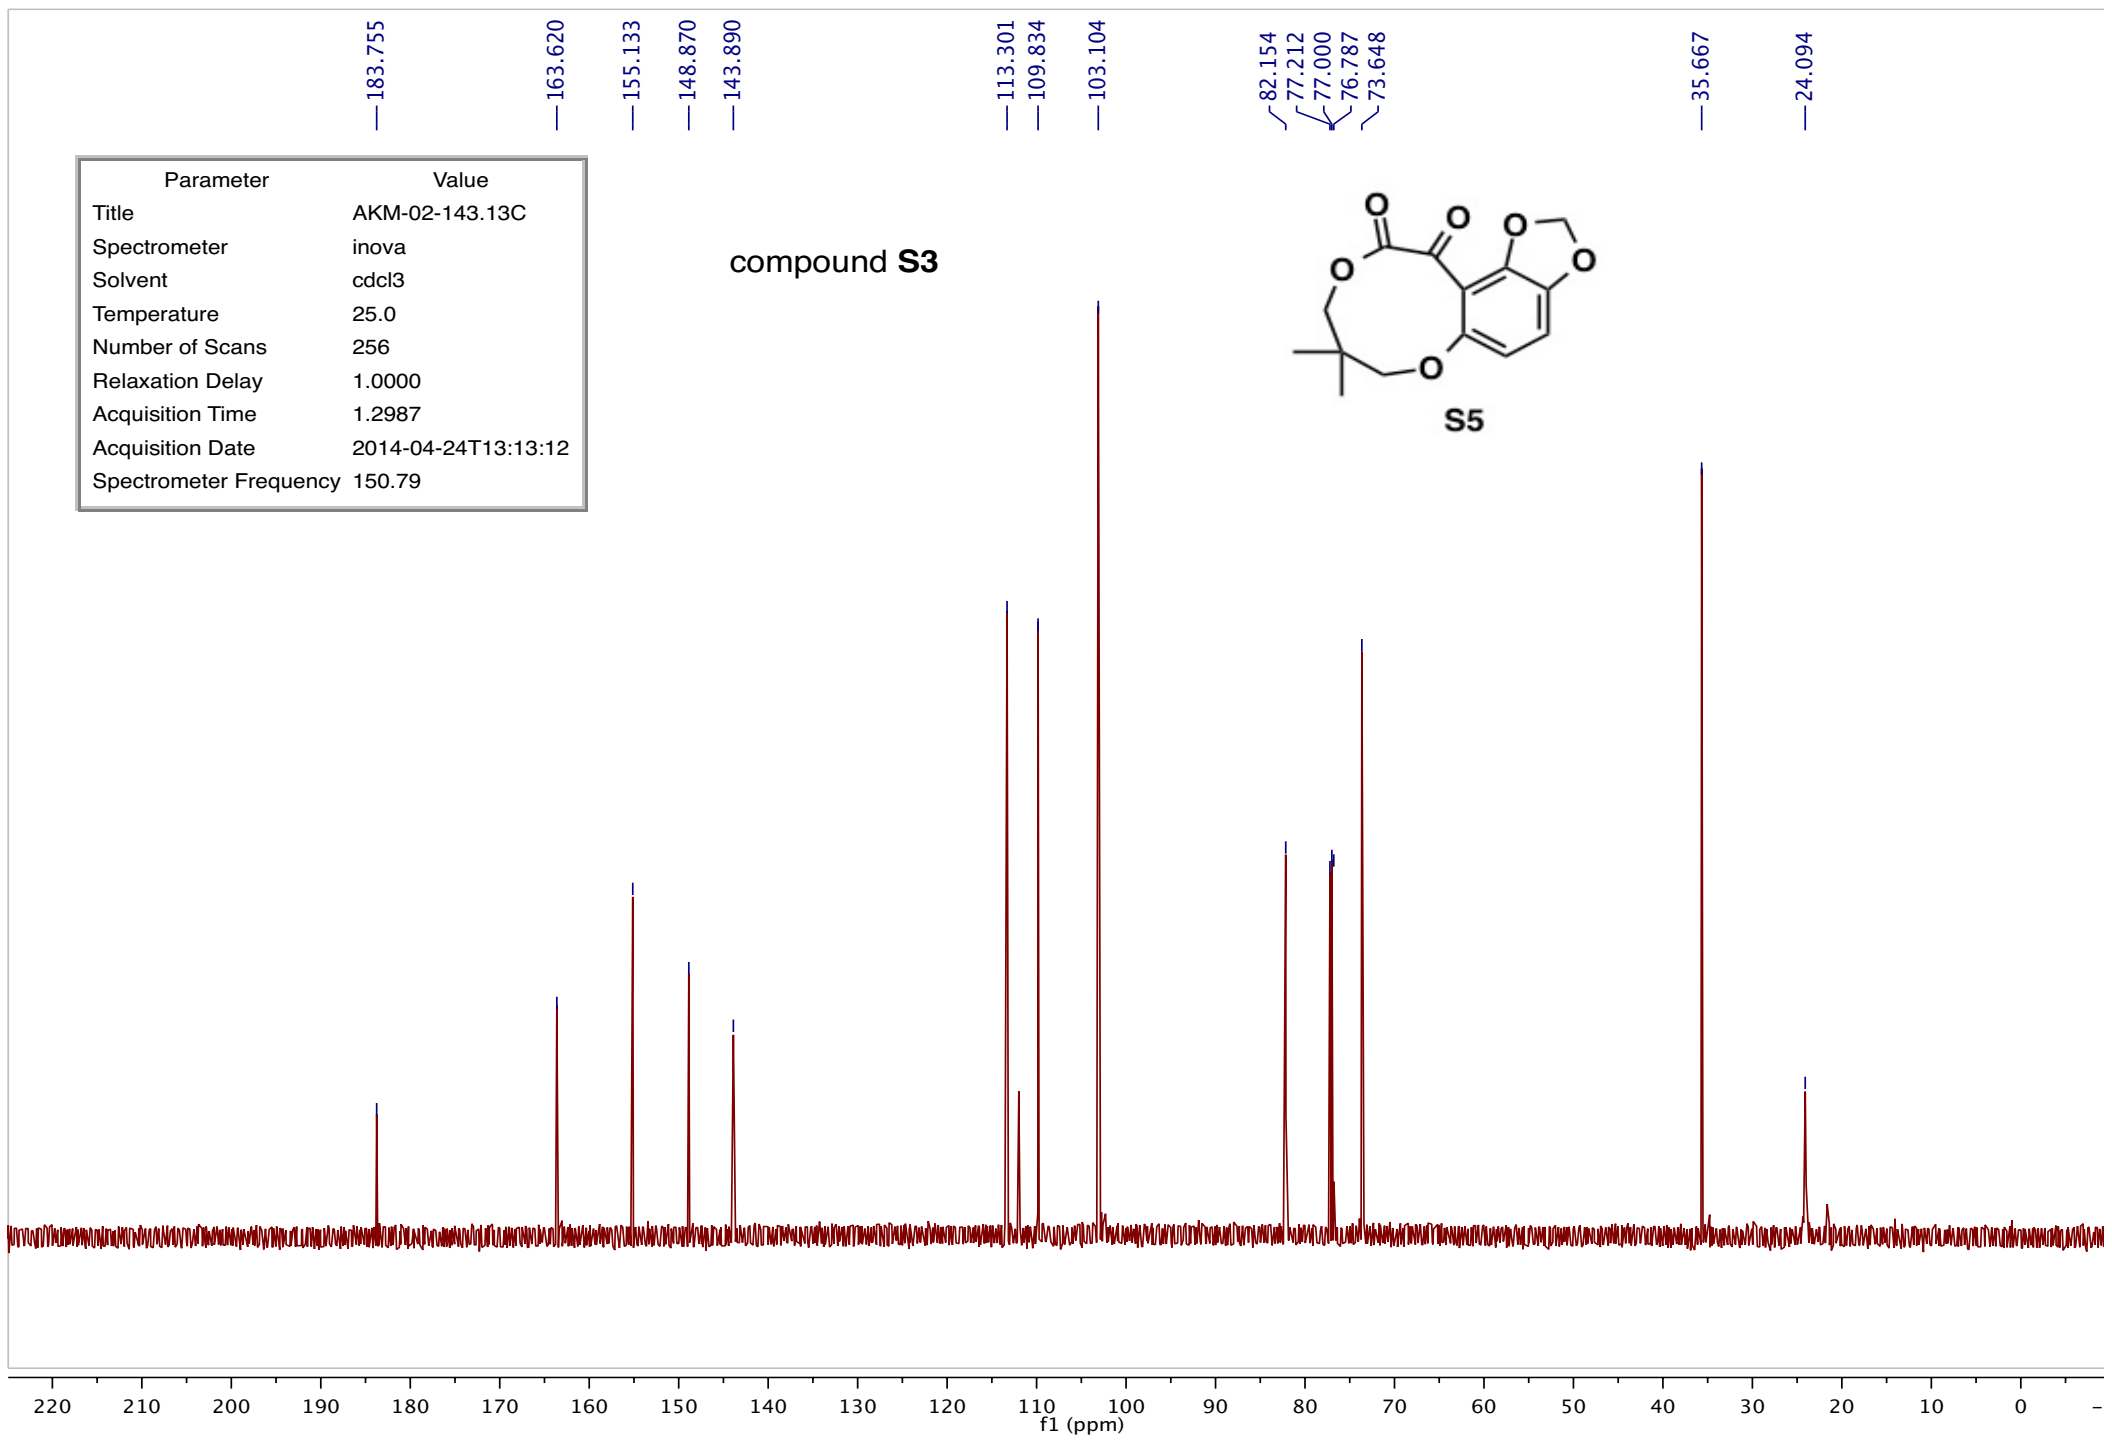

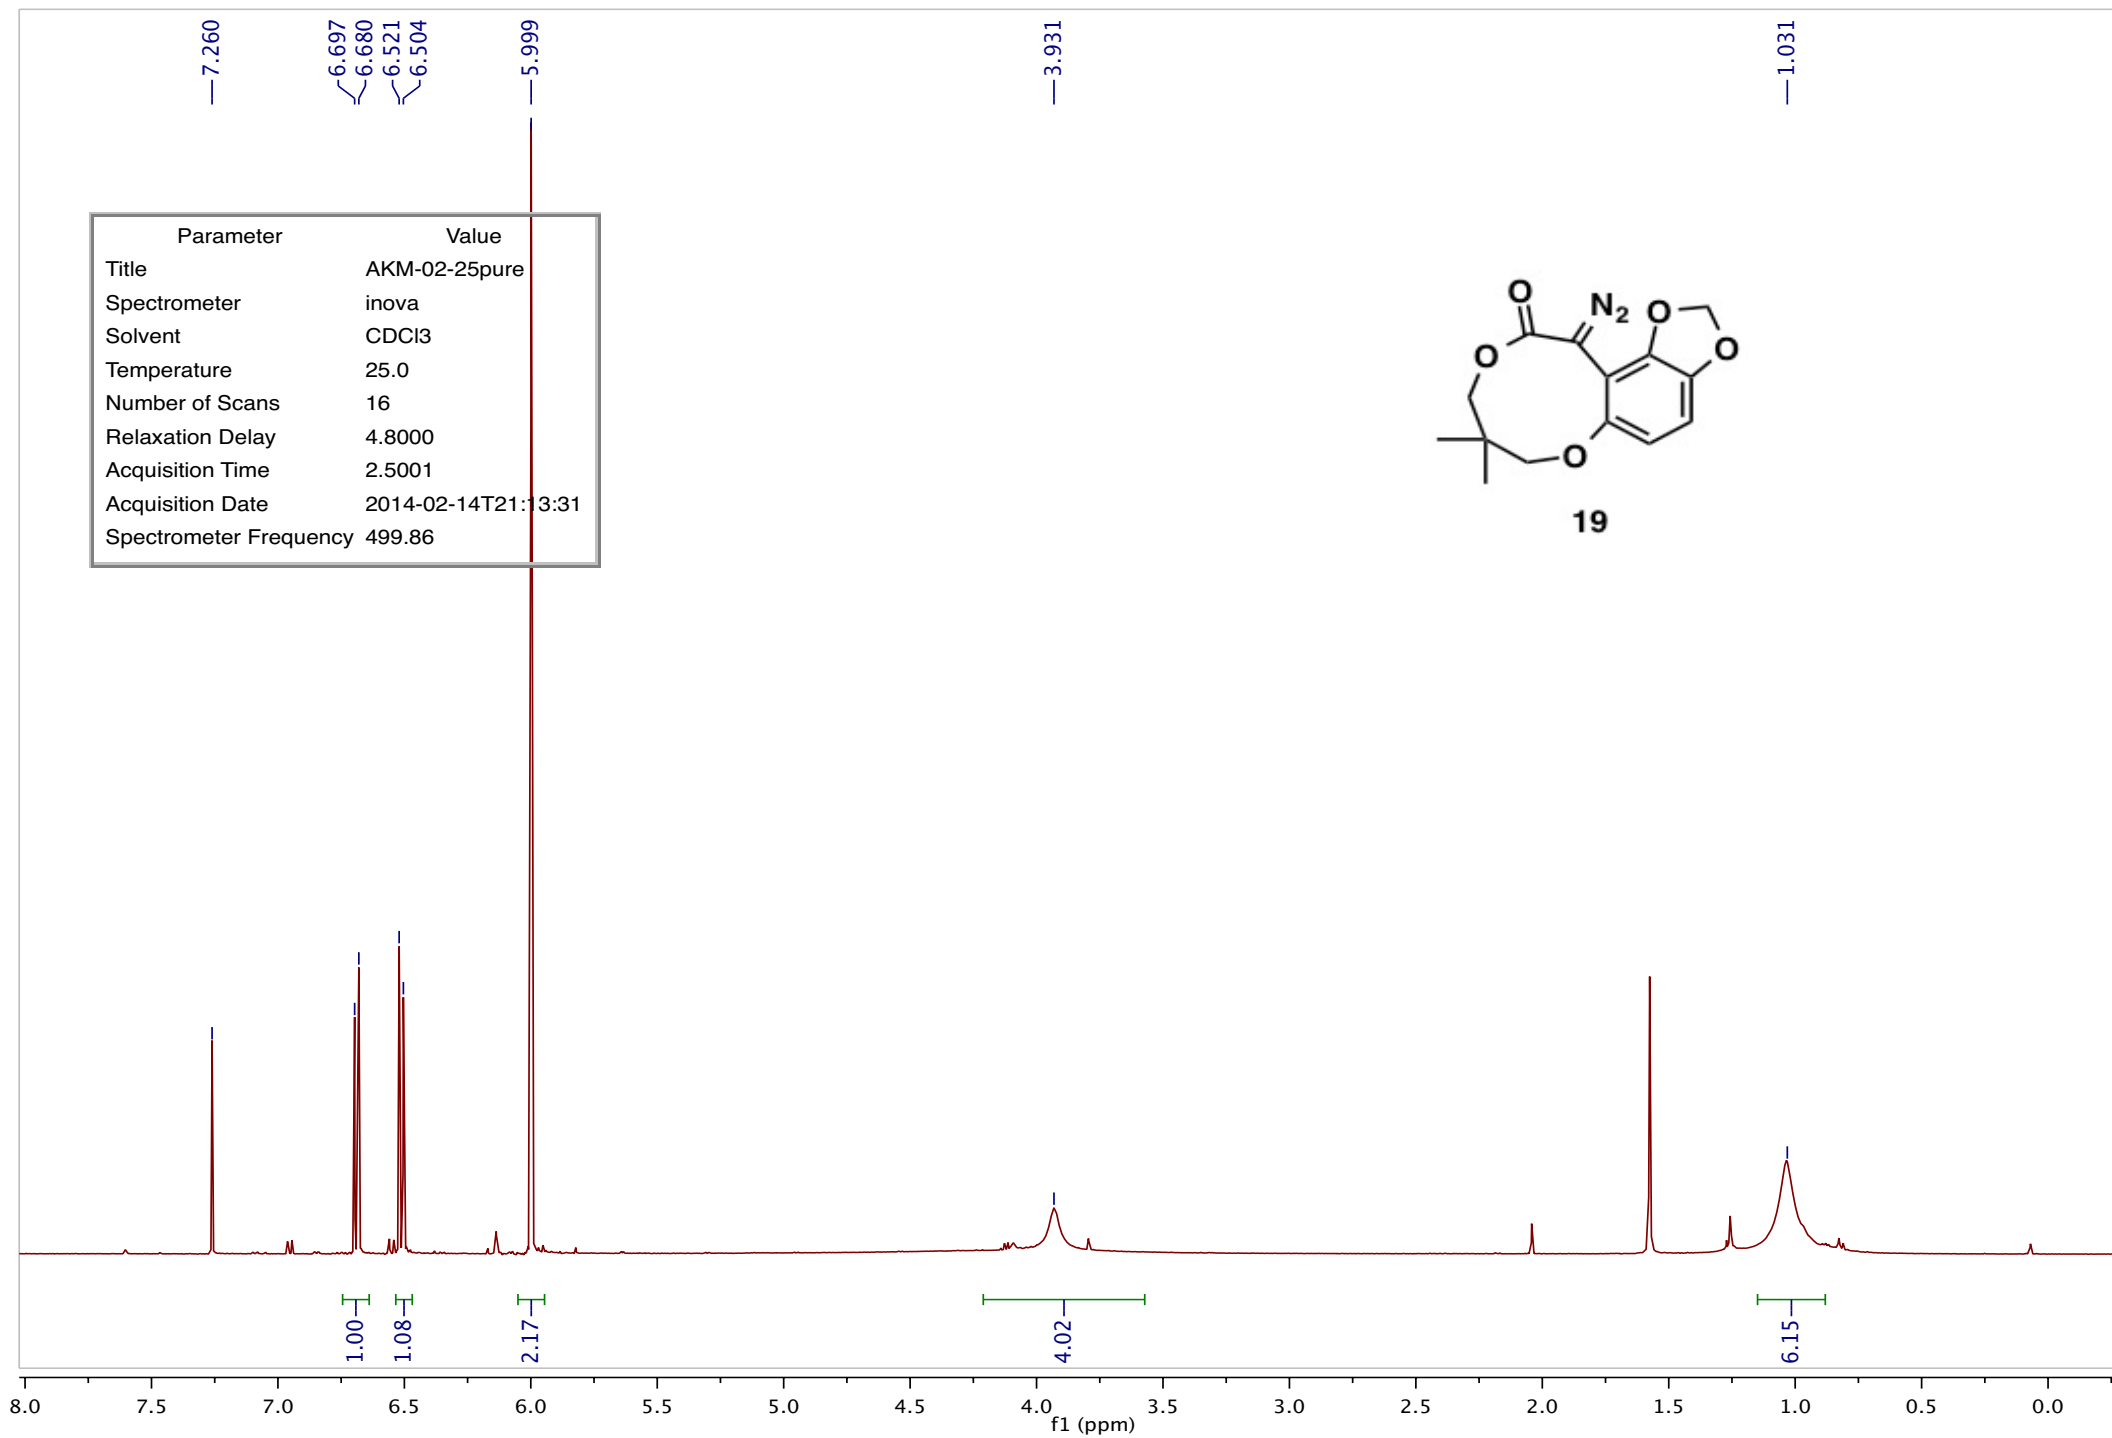



| Parameter              | Value               |
|------------------------|---------------------|
| Title                  | AKM-02-25pure13C    |
| Spectrometer           | inova               |
| Solvent                | CDCl3               |
| Temperature            | 25.0                |
| Number of Scans        | 488                 |
| Relaxation Delay       | 1.0000              |
| Acquisition Time       | 1.3026              |
| Acquisition Date       | 2014-02-14T21:14:37 |
| Spectrometer Frequency | 125.70              |

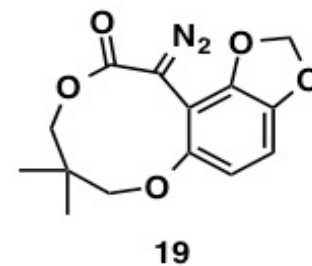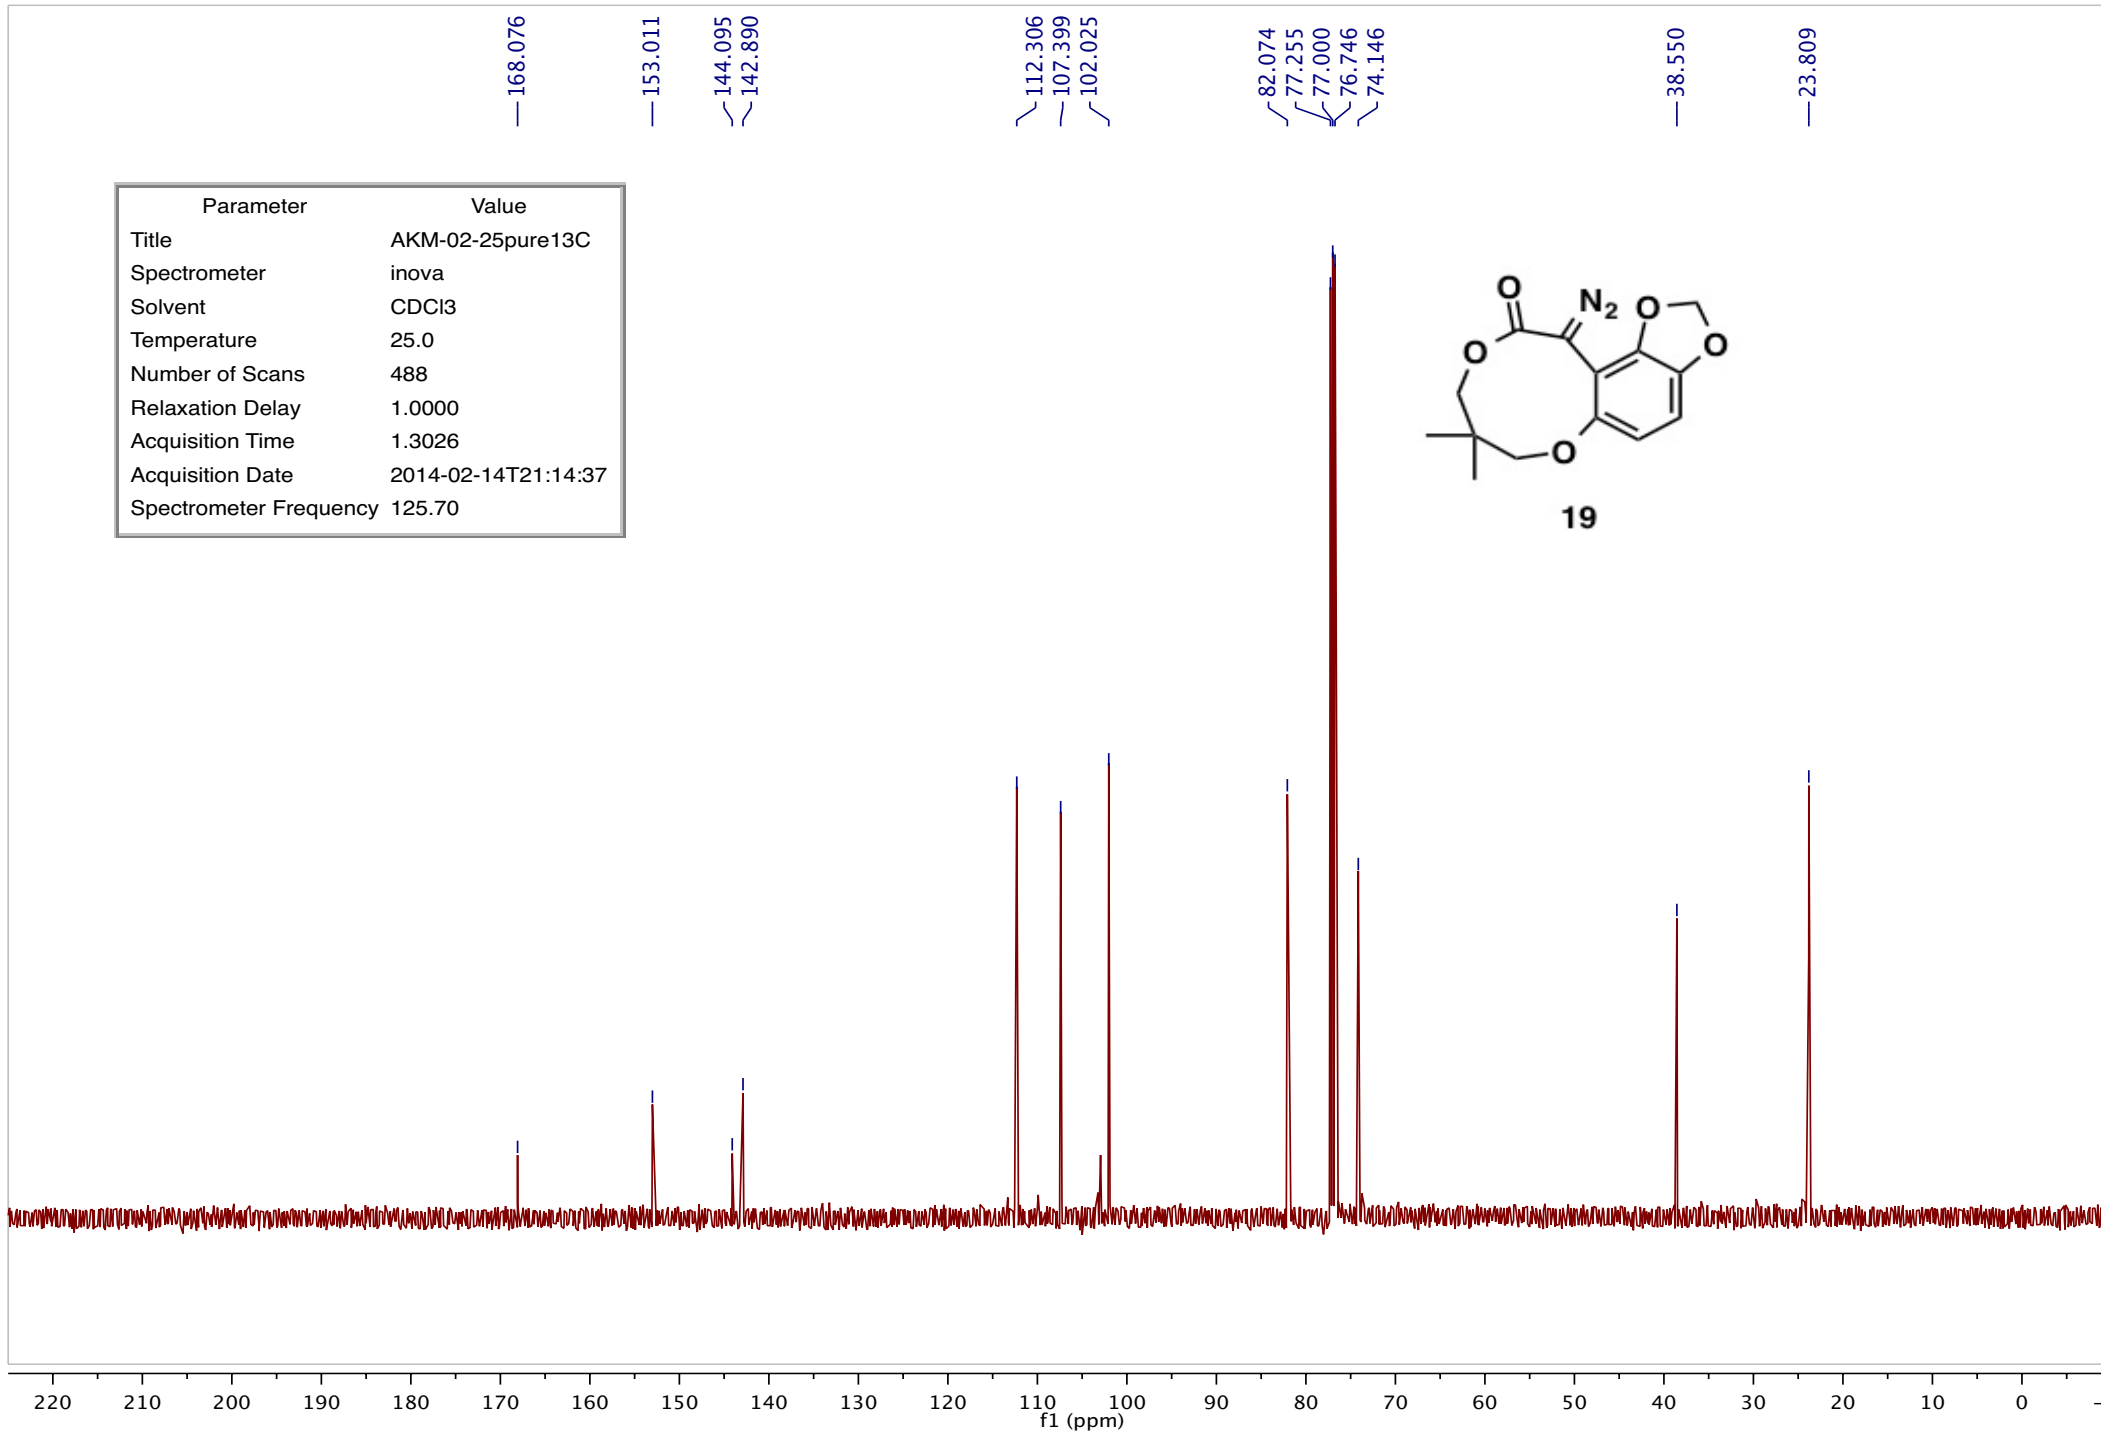

7.260  
7.214  
7.196  
6.847  
6.829  
6.695  
6.678  
6.476  
6.471  
6.320  
6.315  
6.303  
6.298  
— 5.901

— 4.426

— 3.796

— 3.660

— 3.286

— 1.002

| Parameter              | Value               |
|------------------------|---------------------|
| Title                  | AKM-02-11           |
| Spectrometer           | inova               |
| Solvent                | CDCl3               |
| Temperature            | 24.0                |
| Number of Scans        | 4                   |
| Relaxation Delay       | 4.8000              |
| Acquisition Time       | 2.5001              |
| Acquisition Date       | 2014-01-31T15:06:02 |
| Spectrometer Frequency | 499.86              |

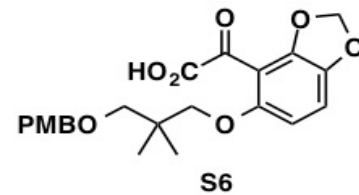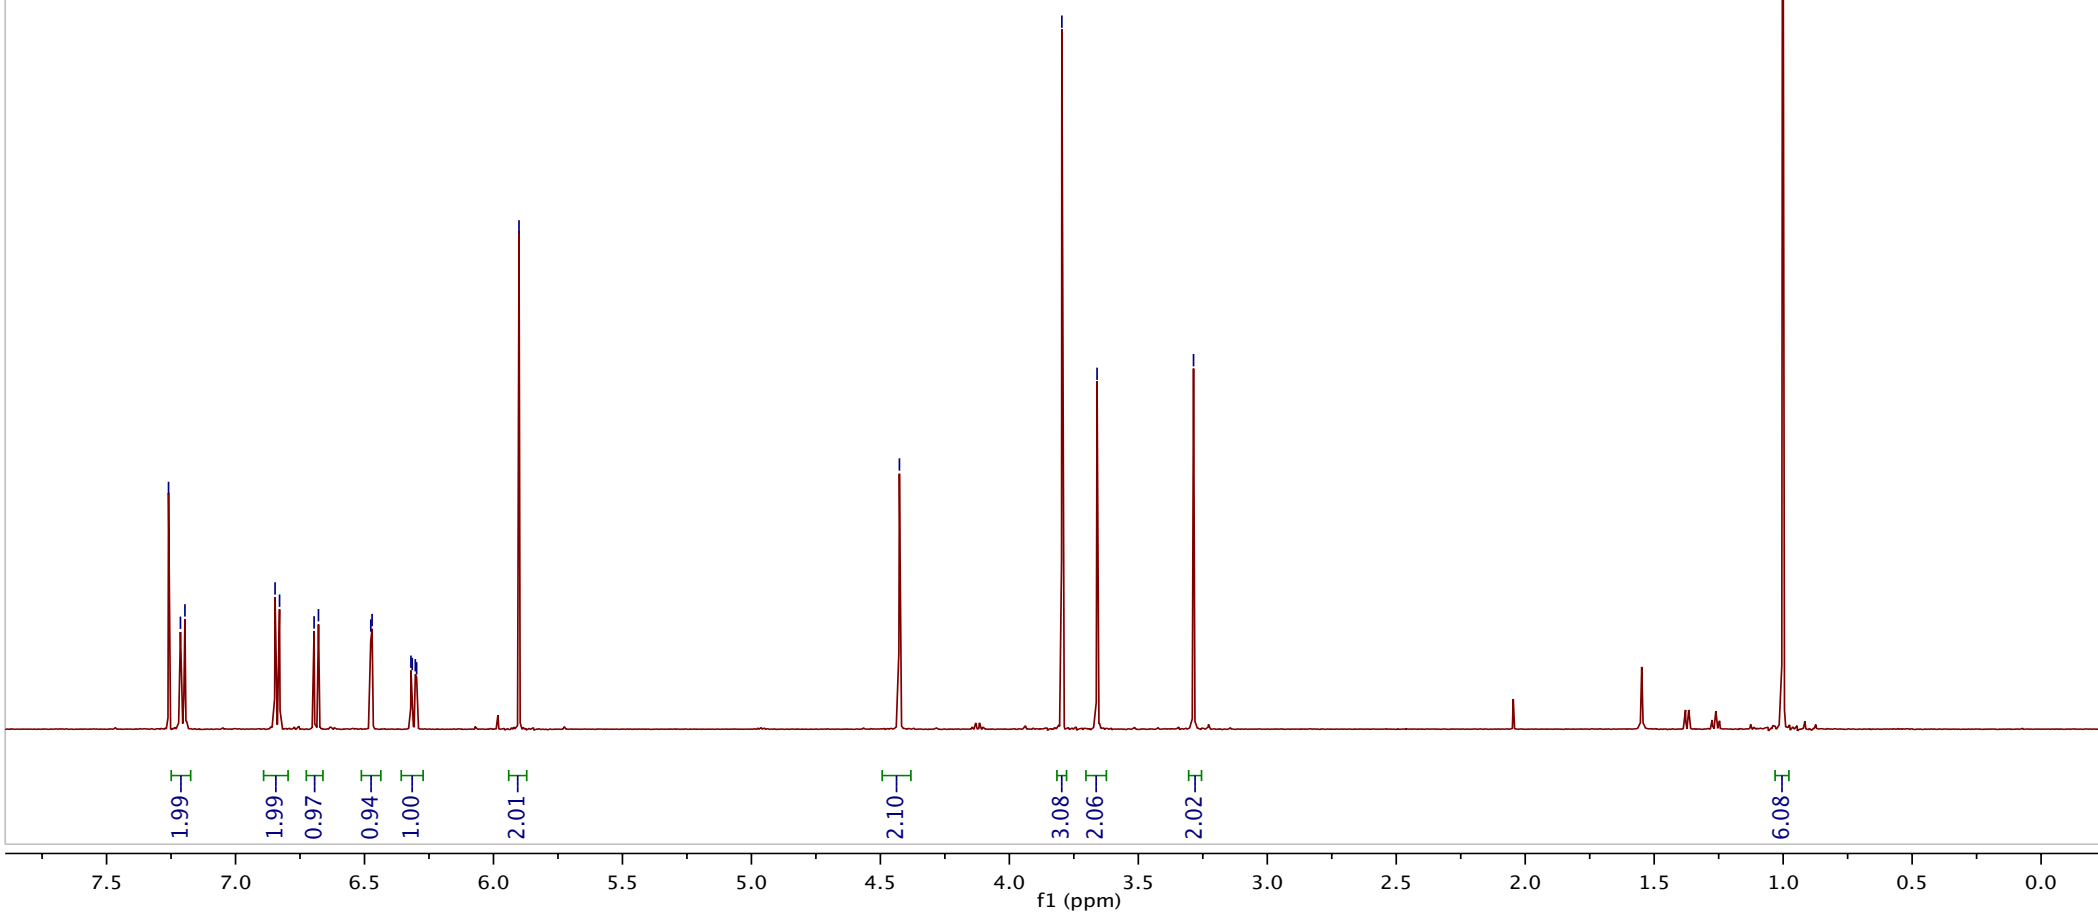

| Parameter              | Value               |
|------------------------|---------------------|
| Title                  | AKM-02-10.13C       |
| Spectrometer           | inova               |
| Solvent                | cd3od               |
| Temperature            | 25.0                |
| Number of Scans        | 296                 |
| Relaxation Delay       | 1.0000              |
| Acquisition Time       | 1.3026              |
| Acquisition Date       | 2014-02-26T17:36:40 |
| Spectrometer Frequency | 125.70              |

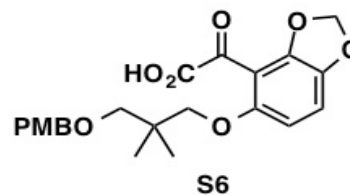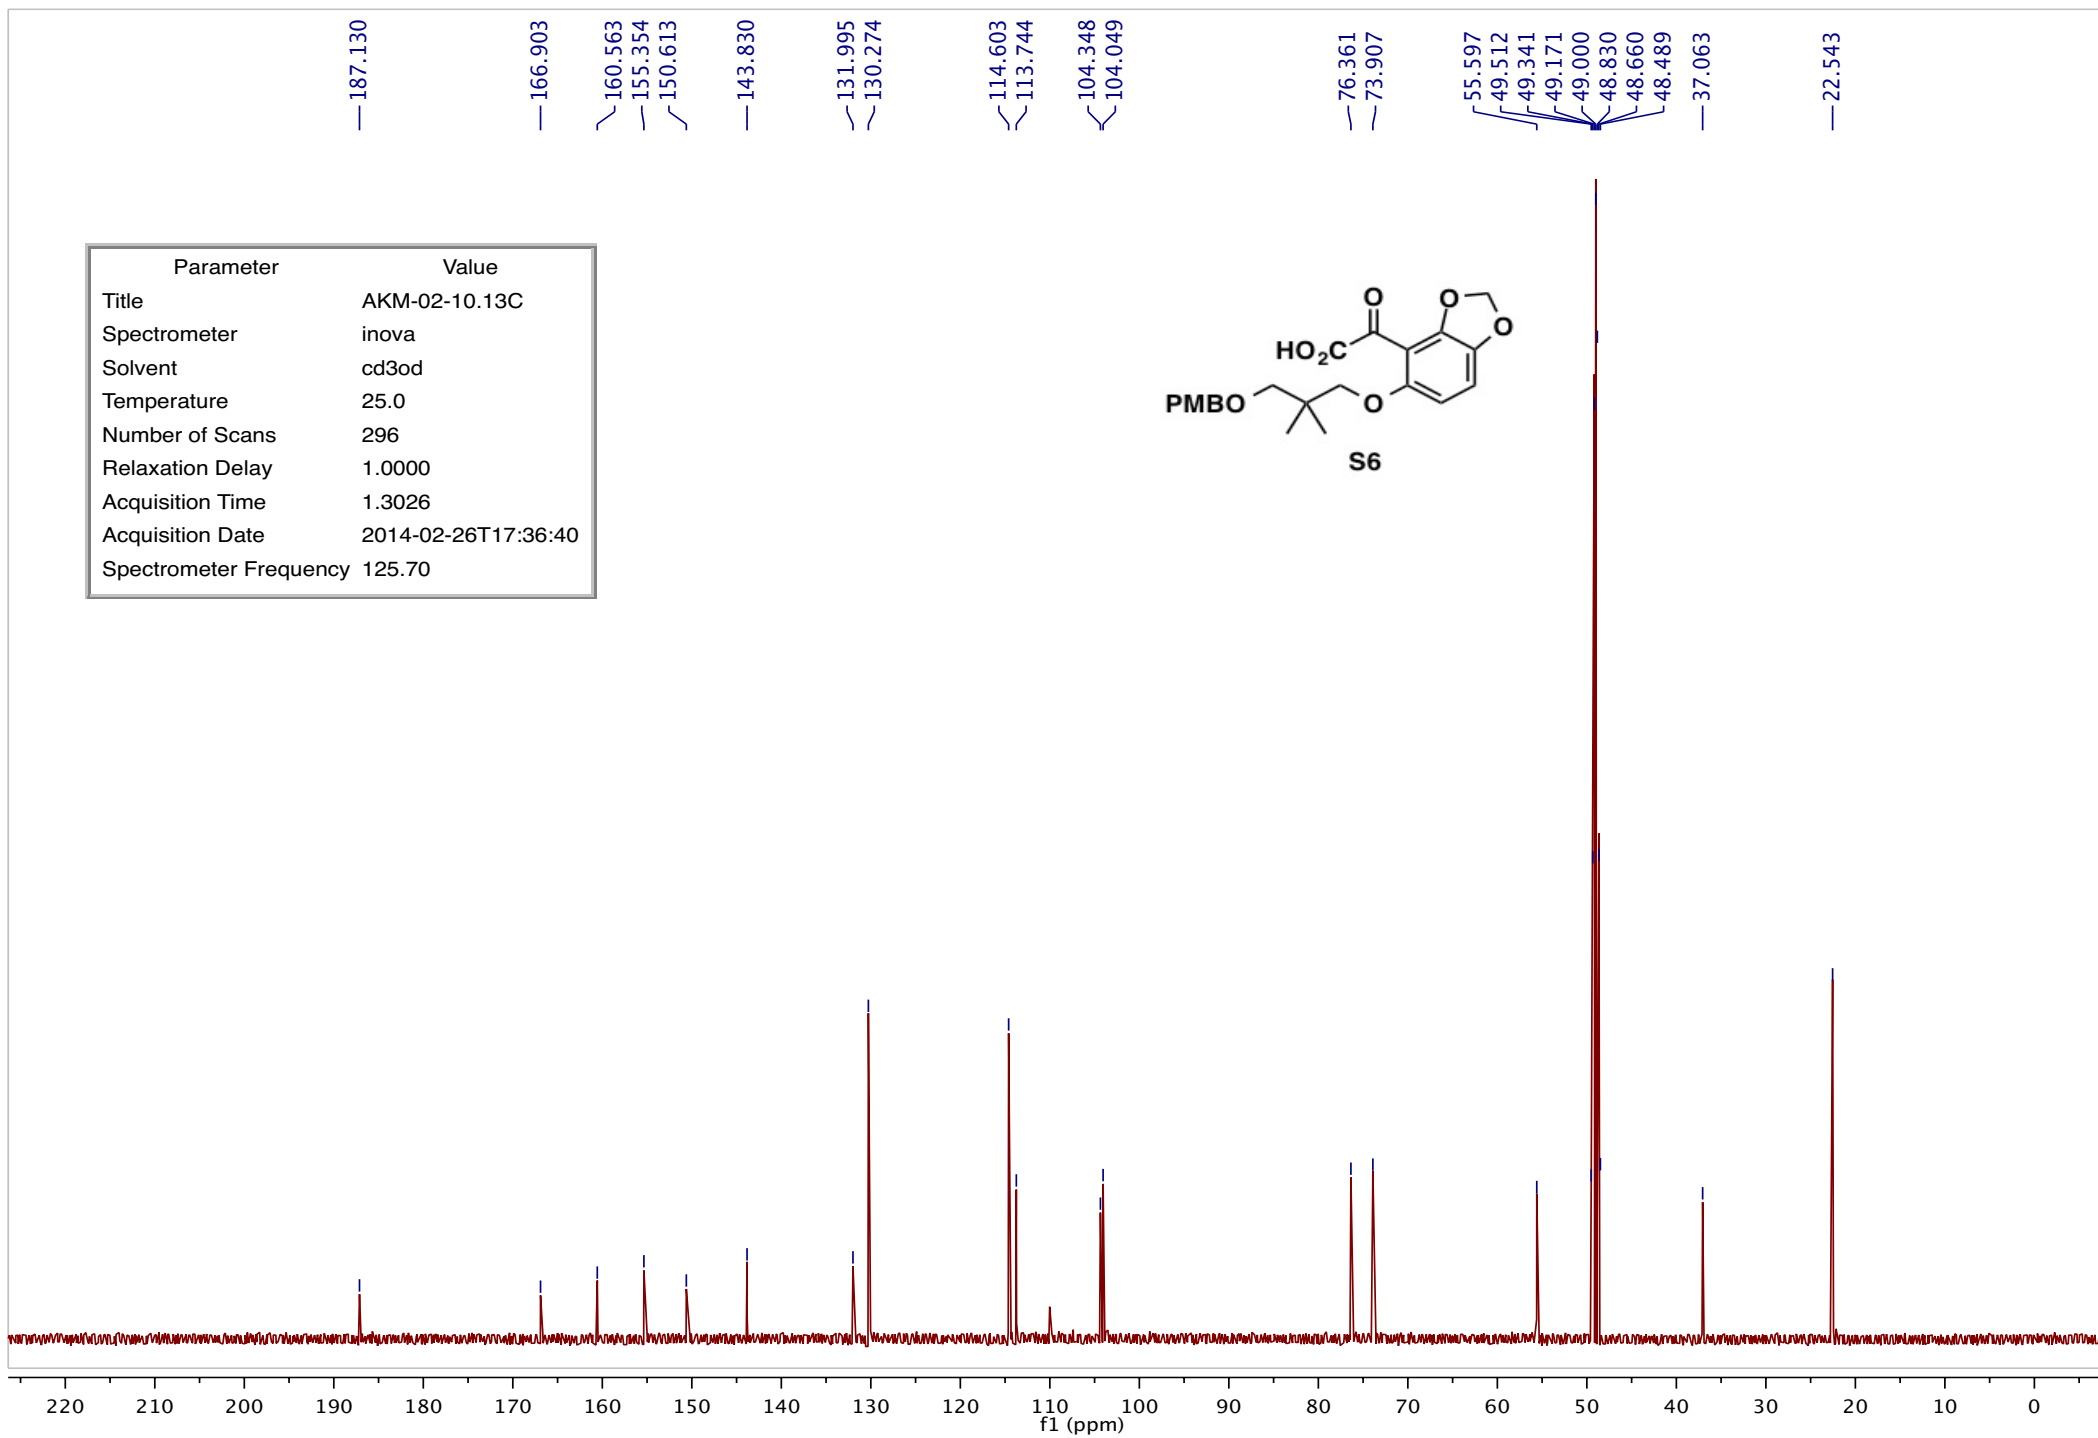

7.260

4.247  
4.233  
4.220  
4.207  
3.809  
3.477  
3.418  
3.407  
3.403  
3.394  
3.392  
3.278  
3.264  
3.258  
1.921  
1.912  
1.909  
1.897  
1.896  
1.882  
1.841  
1.829  
1.826  
1.814  
1.811  
1.810  
1.266  
1.253

| Parameter              | Value               |
|------------------------|---------------------|
| Title                  | AKM-03-65           |
| Spectrometer           | inova               |
| Solvent                | CDCl3               |
| Temperature            | 25.0                |
| Number of Scans        | 12                  |
| Relaxation Delay       | 4.8000              |
| Acquisition Time       | 2.5001              |
| Acquisition Date       | 2014-09-09T16:22:53 |
| Spectrometer Frequency | 499.86              |

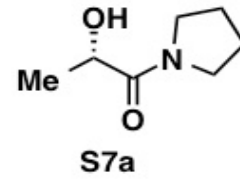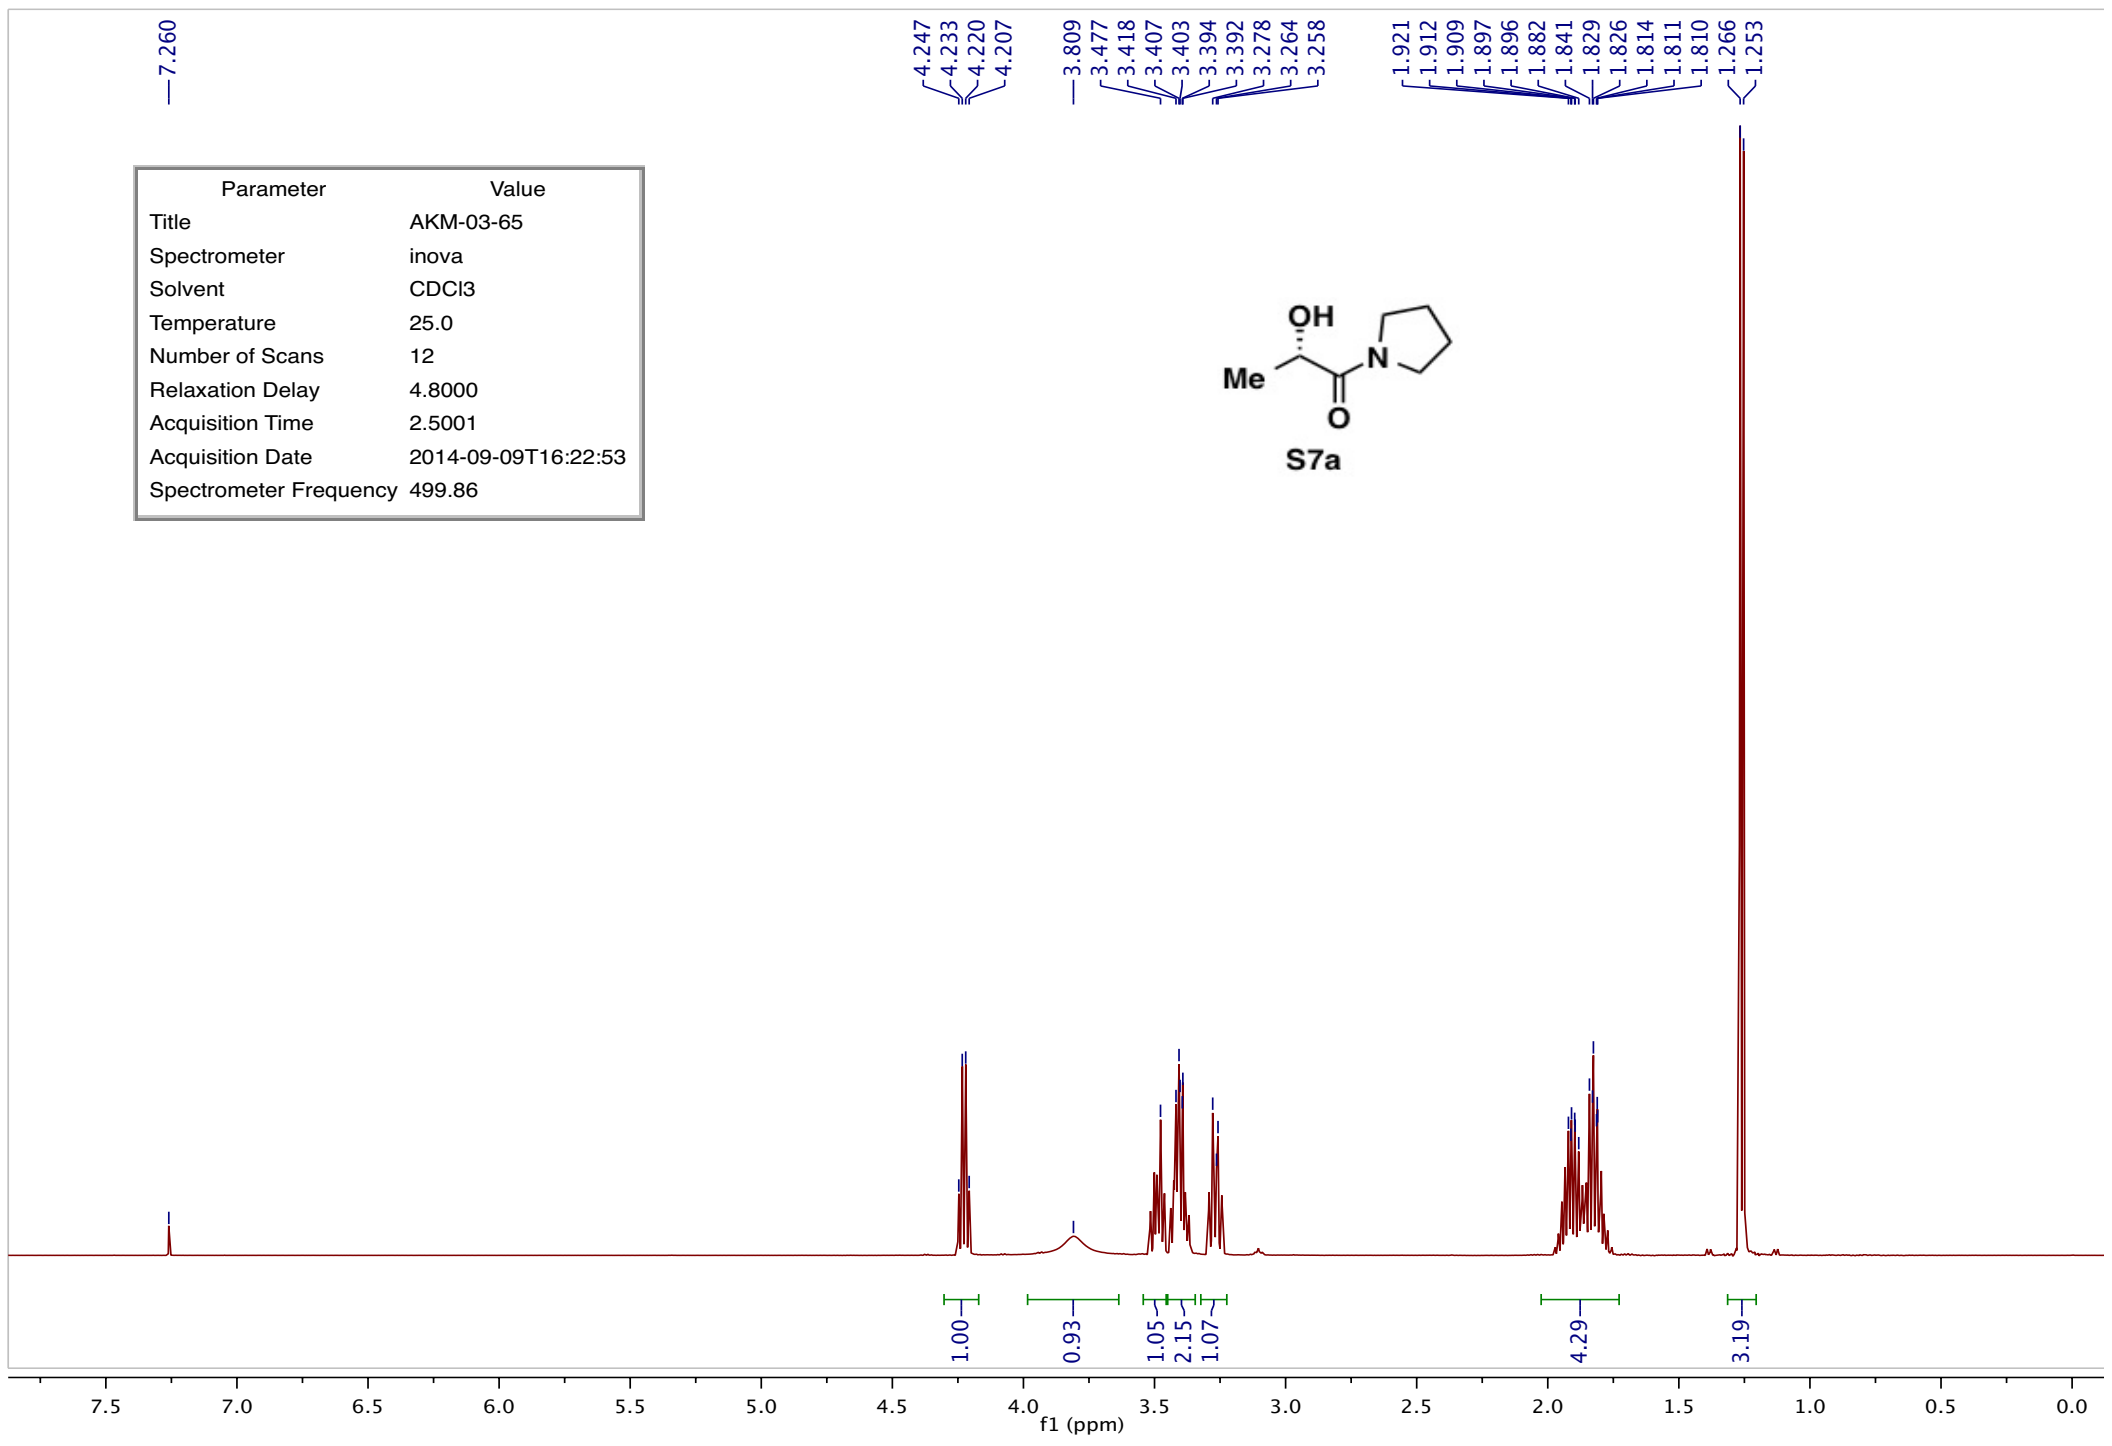

1.00  
0.93  
1.05  
2.15  
1.07  
4.29  
3.19

| Parameter              | Value               |
|------------------------|---------------------|
| Title                  | AKM-03-65.13C       |
| Spectrometer           | inova               |
| Solvent                | CDCl3               |
| Temperature            | 25.0                |
| Number of Scans        | 108                 |
| Relaxation Delay       | 1.0000              |
| Acquisition Time       | 1.3026              |
| Acquisition Date       | 2014-09-09T16:25:42 |
| Spectrometer Frequency | 125.70              |

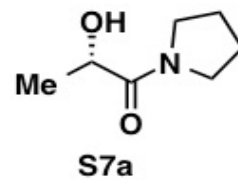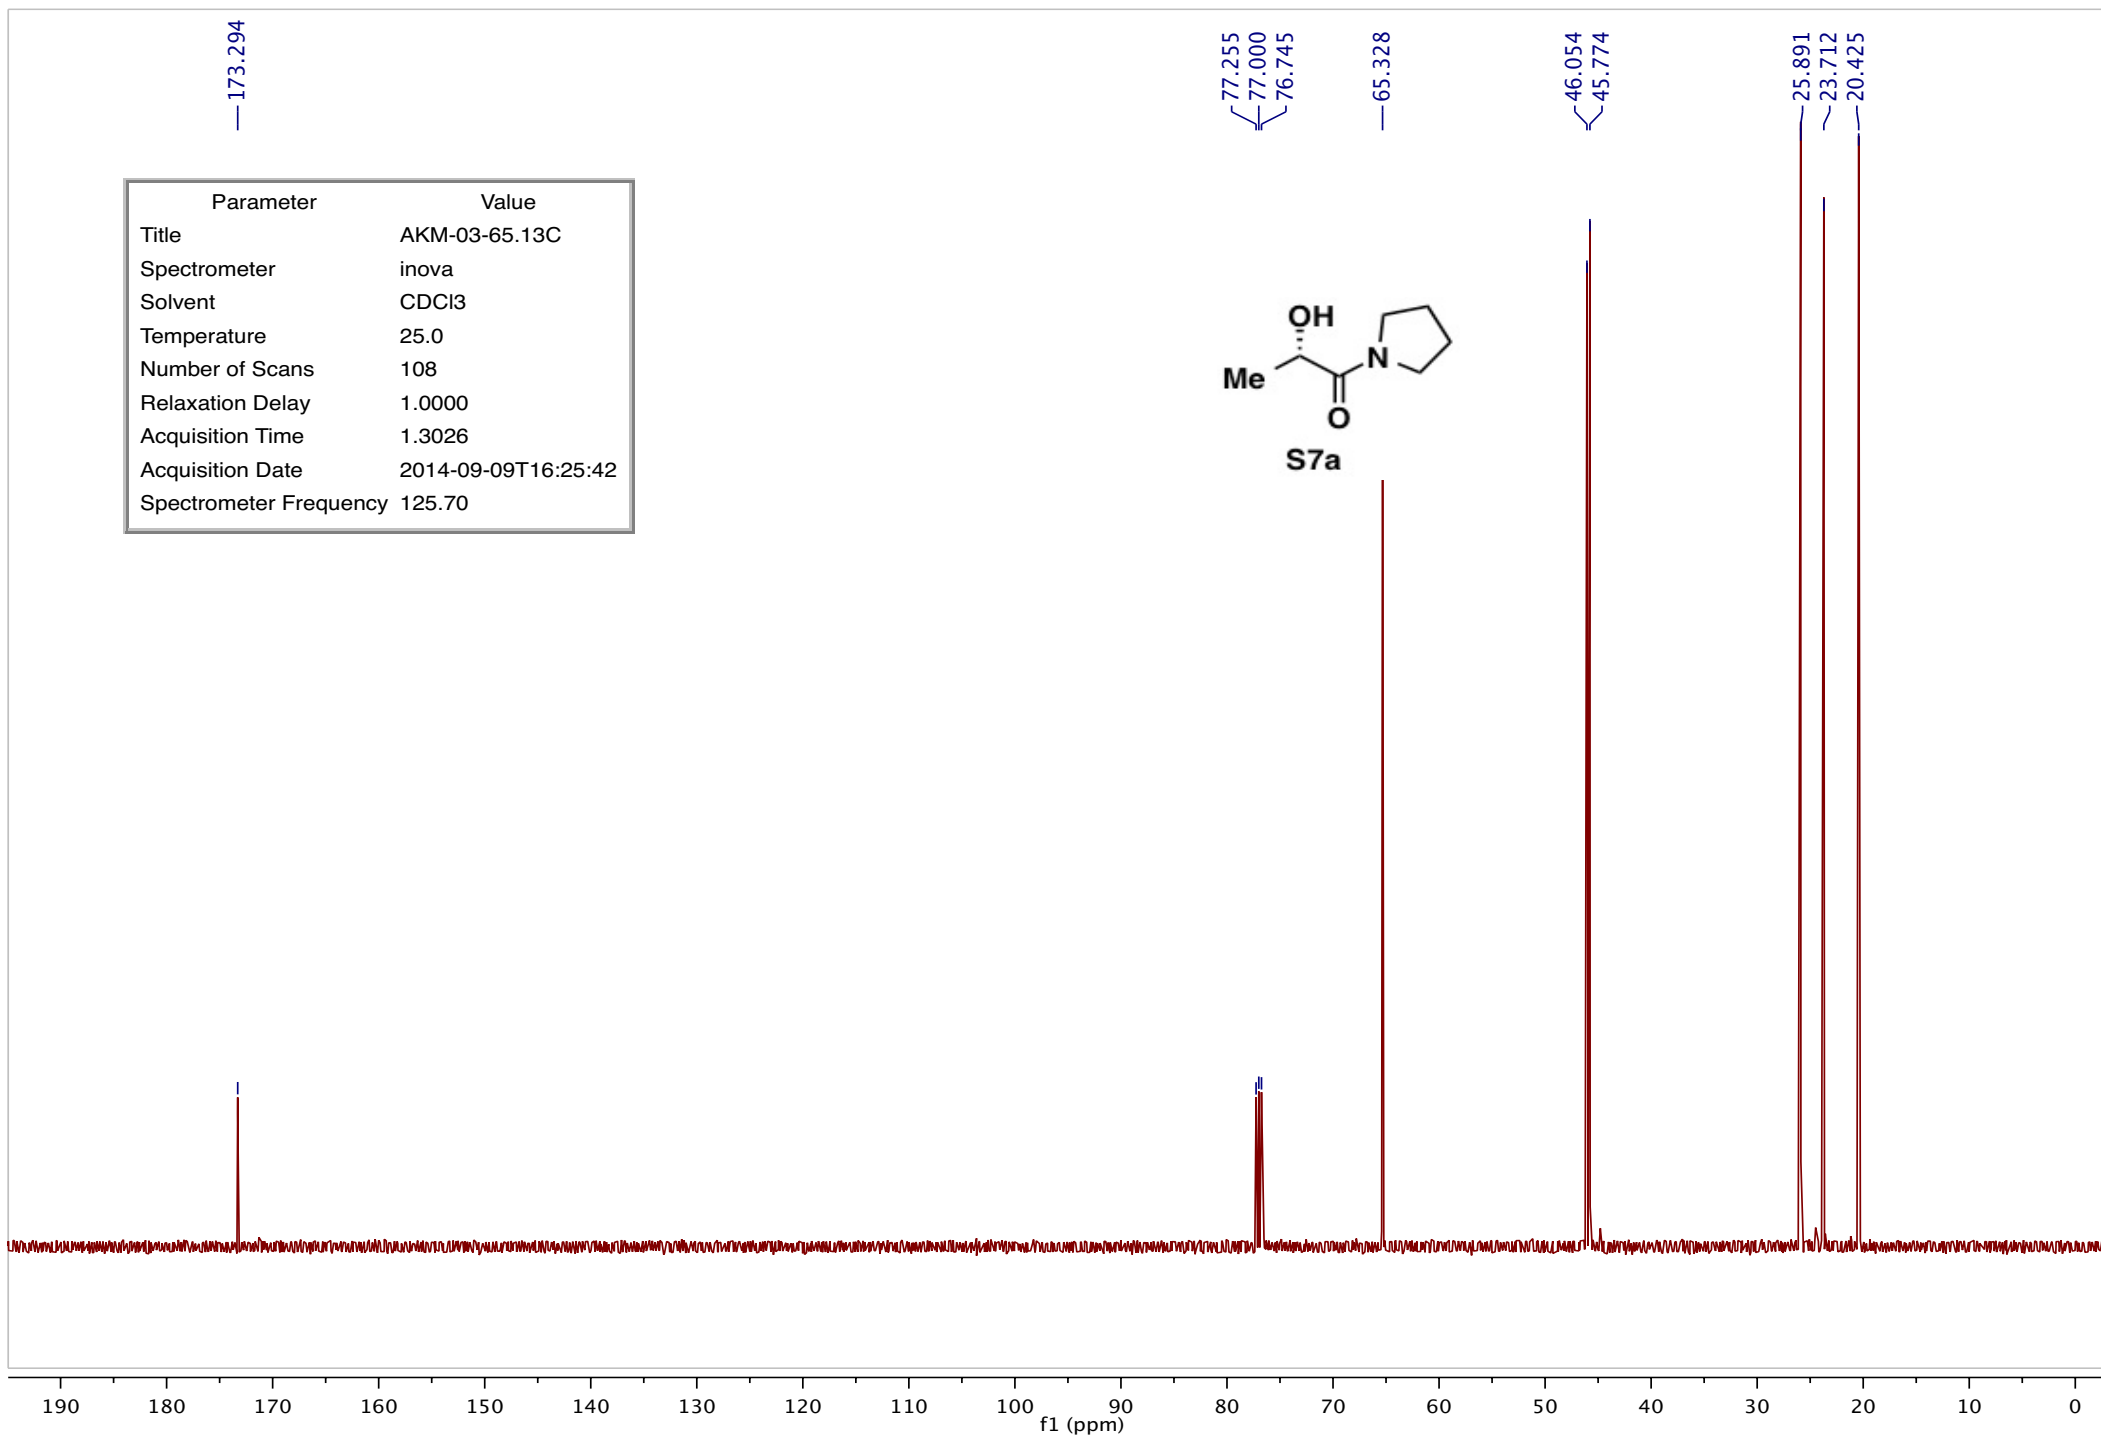

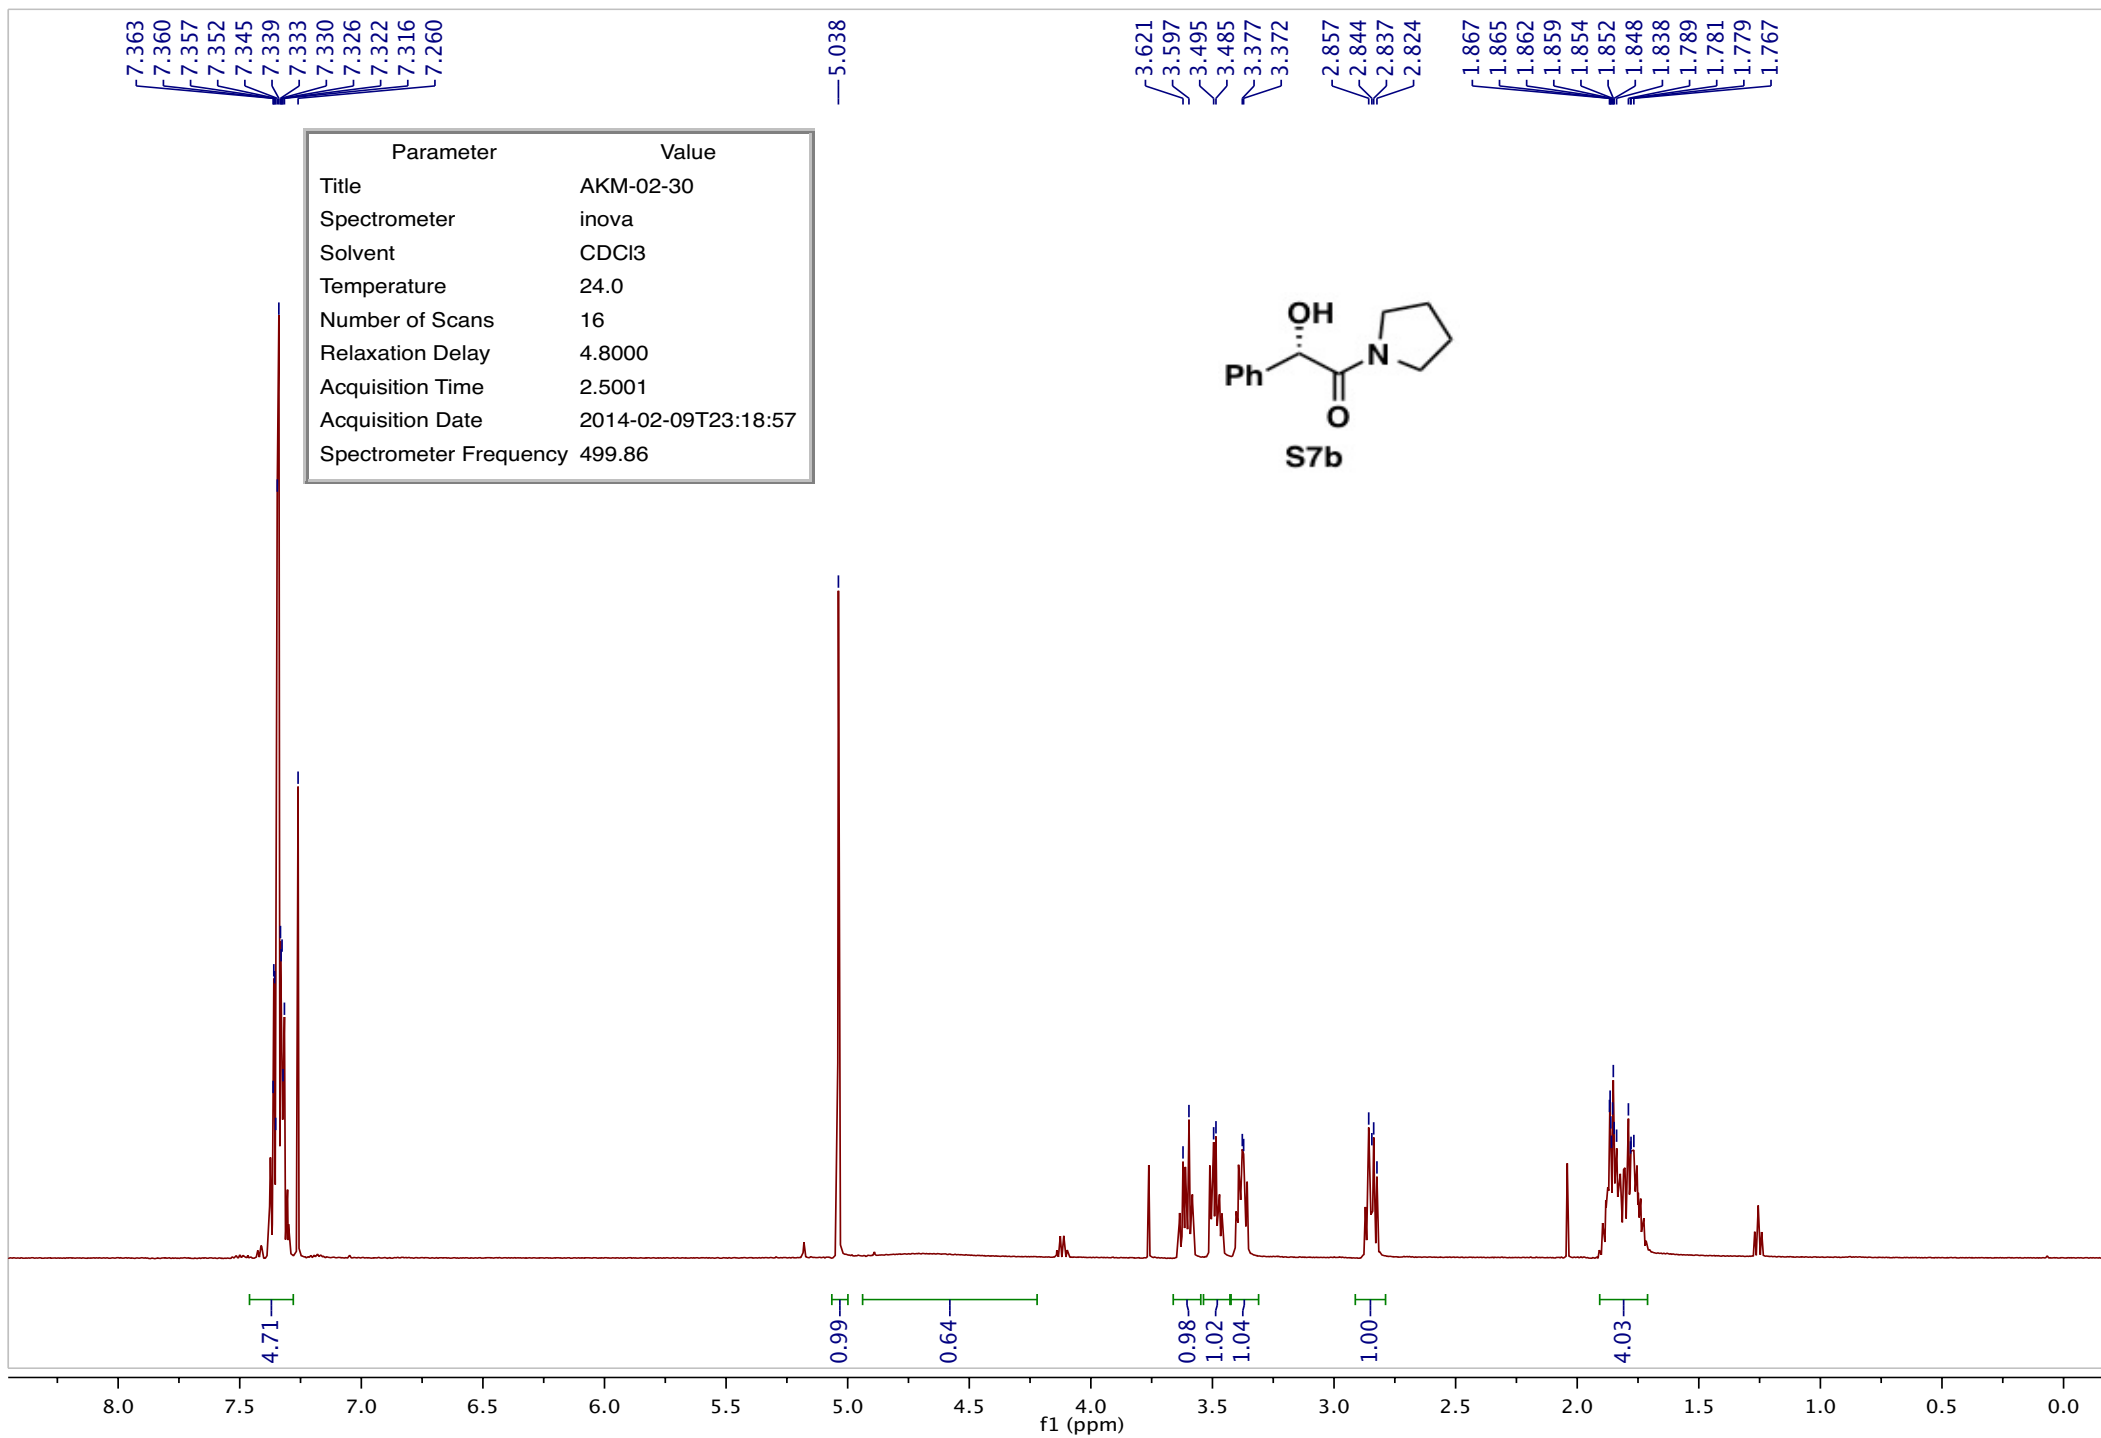

7.363  
7.360  
7.357  
7.352  
7.345  
7.339  
7.333  
7.330  
7.326  
7.322  
7.316  
7.260

5.038

3.621  
3.597  
3.495  
3.485  
3.377  
3.372

2.857  
2.844  
2.837  
2.824

1.867  
1.865  
1.862  
1.859  
1.854  
1.852  
1.848  
1.838  
1.789  
1.781  
1.779  
1.767

| Parameter              | Value               |
|------------------------|---------------------|
| Title                  | AKM-02-30           |
| Spectrometer           | inova               |
| Solvent                | CDCl3               |
| Temperature            | 24.0                |
| Number of Scans        | 16                  |
| Relaxation Delay       | 4.8000              |
| Acquisition Time       | 2.5001              |
| Acquisition Date       | 2014-02-09T23:18:57 |
| Spectrometer Frequency | 499.86              |

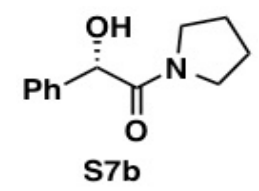

4.71

0.99

0.64

0.98

1.02

1.04

1.00

4.03

8.0 7.5 7.0 6.5 6.0 5.5 5.0 4.5 4.0 3.5 3.0 2.5 2.0 1.5 1.0 0.5 0.0

f1 (ppm)

| Parameter              | Value               |
|------------------------|---------------------|
| Title                  | AKM-02-214.13C      |
| Spectrometer           | inova               |
| Solvent                | CDCl3               |
| Temperature            | 25.0                |
| Number of Scans        | 216                 |
| Relaxation Delay       | 1.0000              |
| Acquisition Time       | 1.3026              |
| Acquisition Date       | 2014-09-02T19:36:45 |
| Spectrometer Frequency | 125.70              |

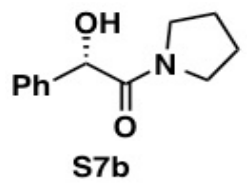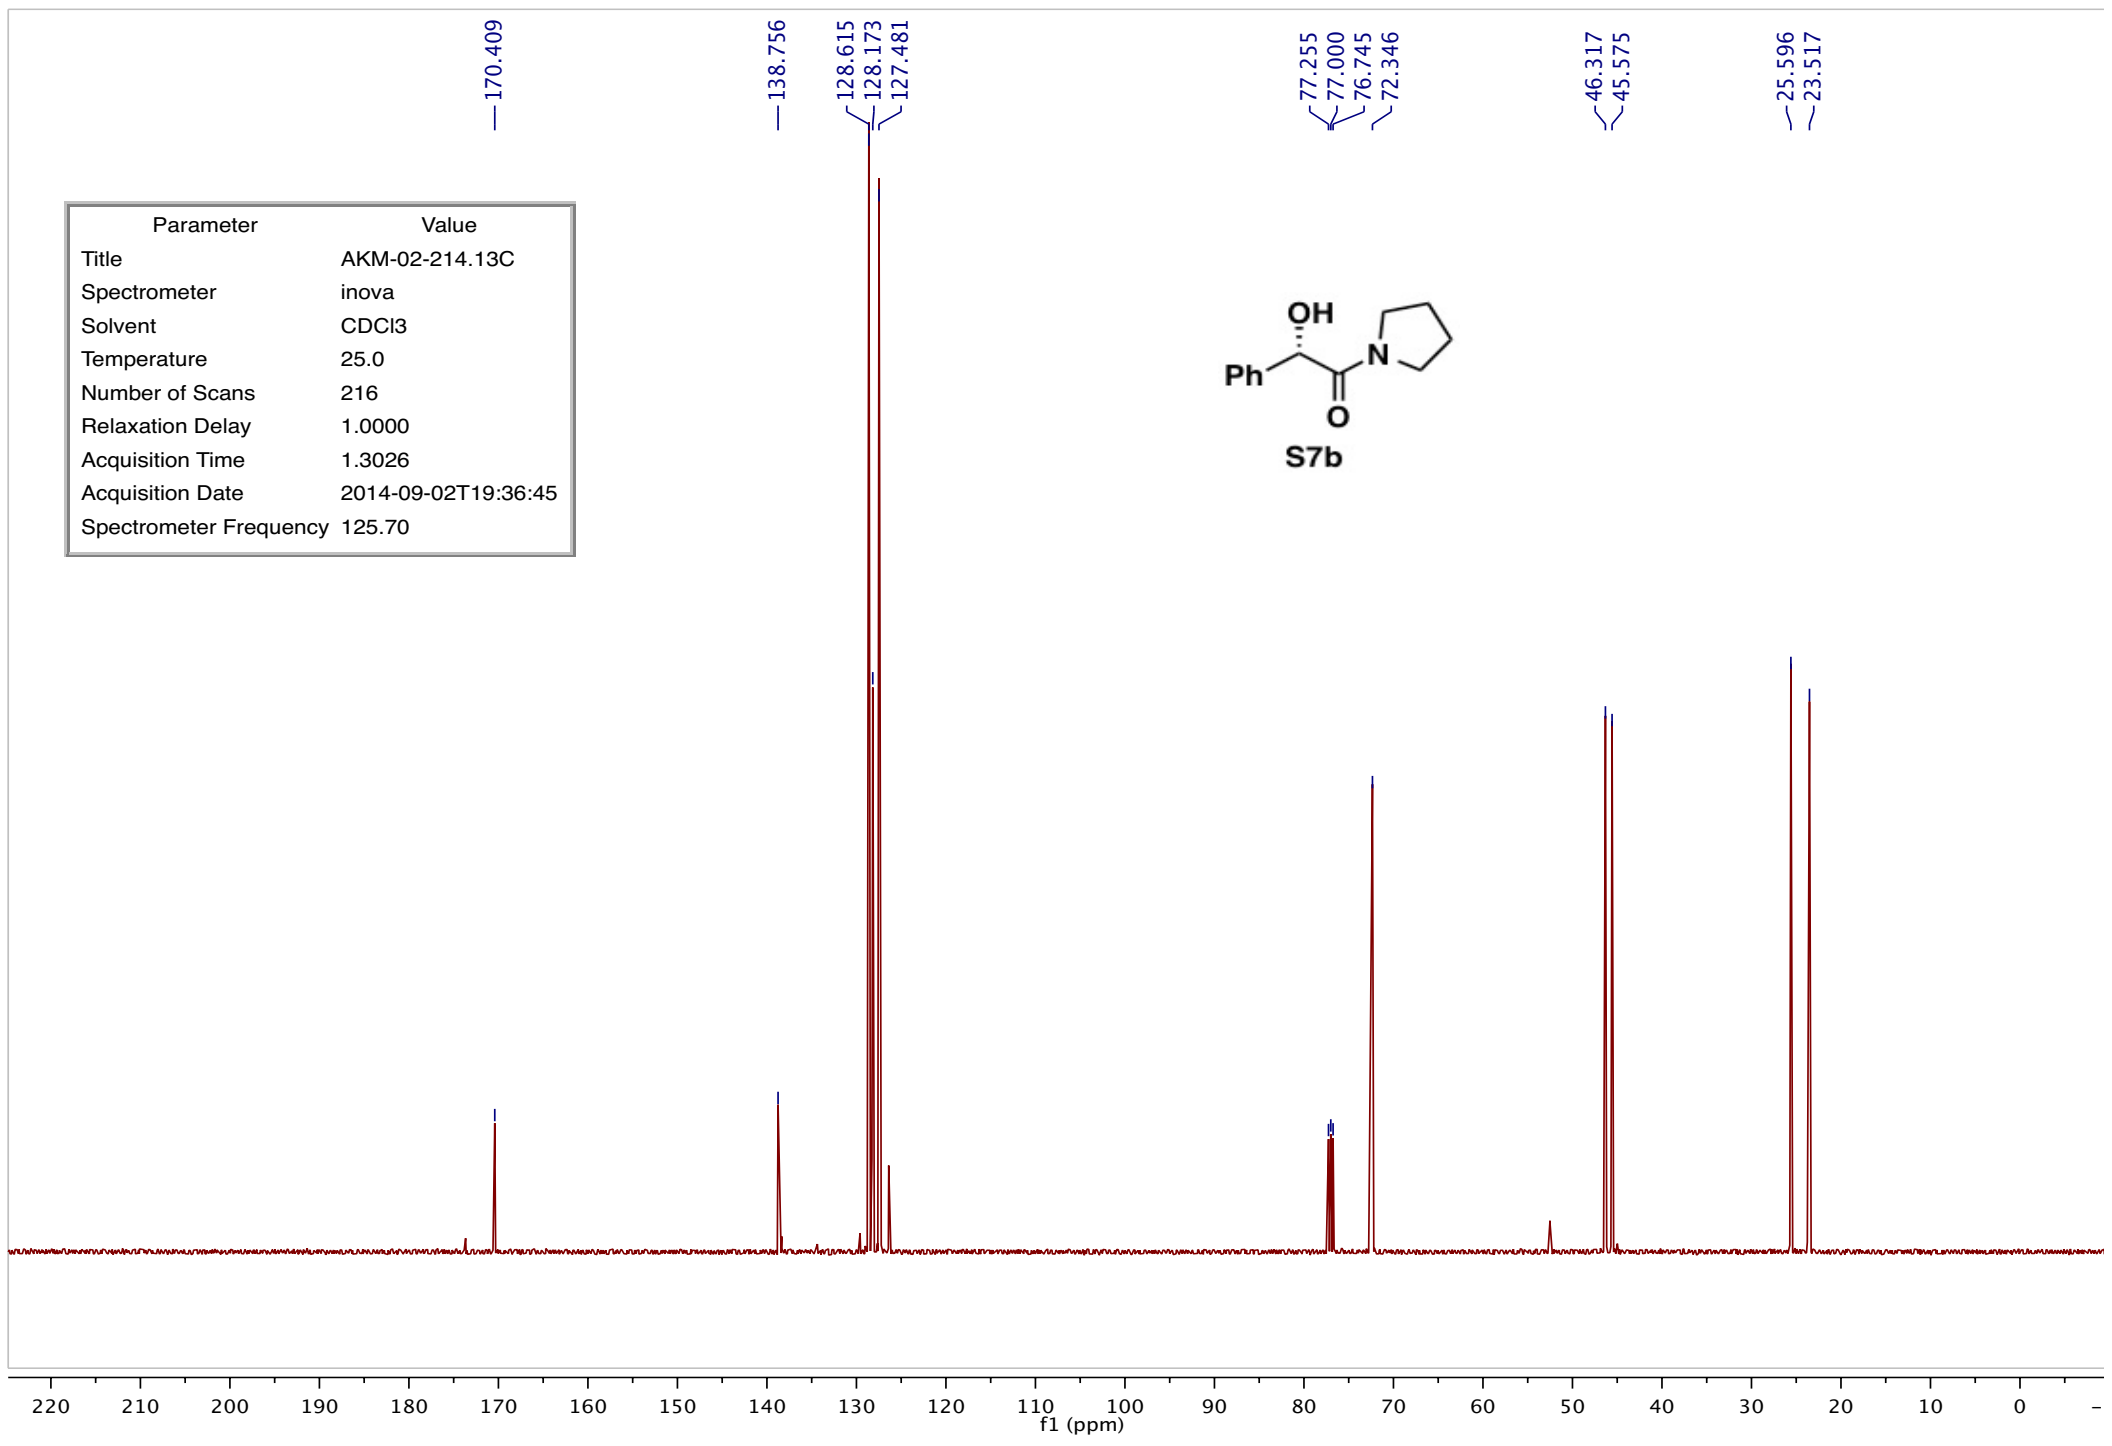

7.260  
7.206  
7.200  
7.196  
7.187  
7.183  
7.177  
6.856  
6.844  
6.839  
6.834  
6.825  
6.821  
6.815  
6.356  
6.338  
6.048  
6.045  
6.027  
6.025  
5.480  
5.469  
5.466  
5.453  
5.439

| Parameter              | Value               |
|------------------------|---------------------|
| Title                  | AKM-1-06            |
| Spectrometer           | inova               |
| Solvent                | CDCl3               |
| Temperature            | 22.0                |
| Number of Scans        | 16                  |
| Relaxation Delay       | 4.8000              |
| Acquisition Time       | 2.5001              |
| Acquisition Date       | 2014-01-18T17:58:25 |
| Spectrometer Frequency | 499.86              |

4.393  
3.796  
3.747  
3.744  
3.654  
3.634  
3.517  
3.503  
3.458  
3.449  
3.445  
3.435  
3.421  
3.416  
3.270  
3.252  
3.242  
3.224  
1.969  
1.966  
1.956  
1.953  
1.940  
1.857  
1.855  
1.851  
1.844  
1.842  
1.837  
1.829  
1.521  
1.507  
0.973  
0.967

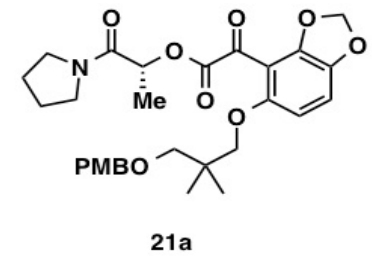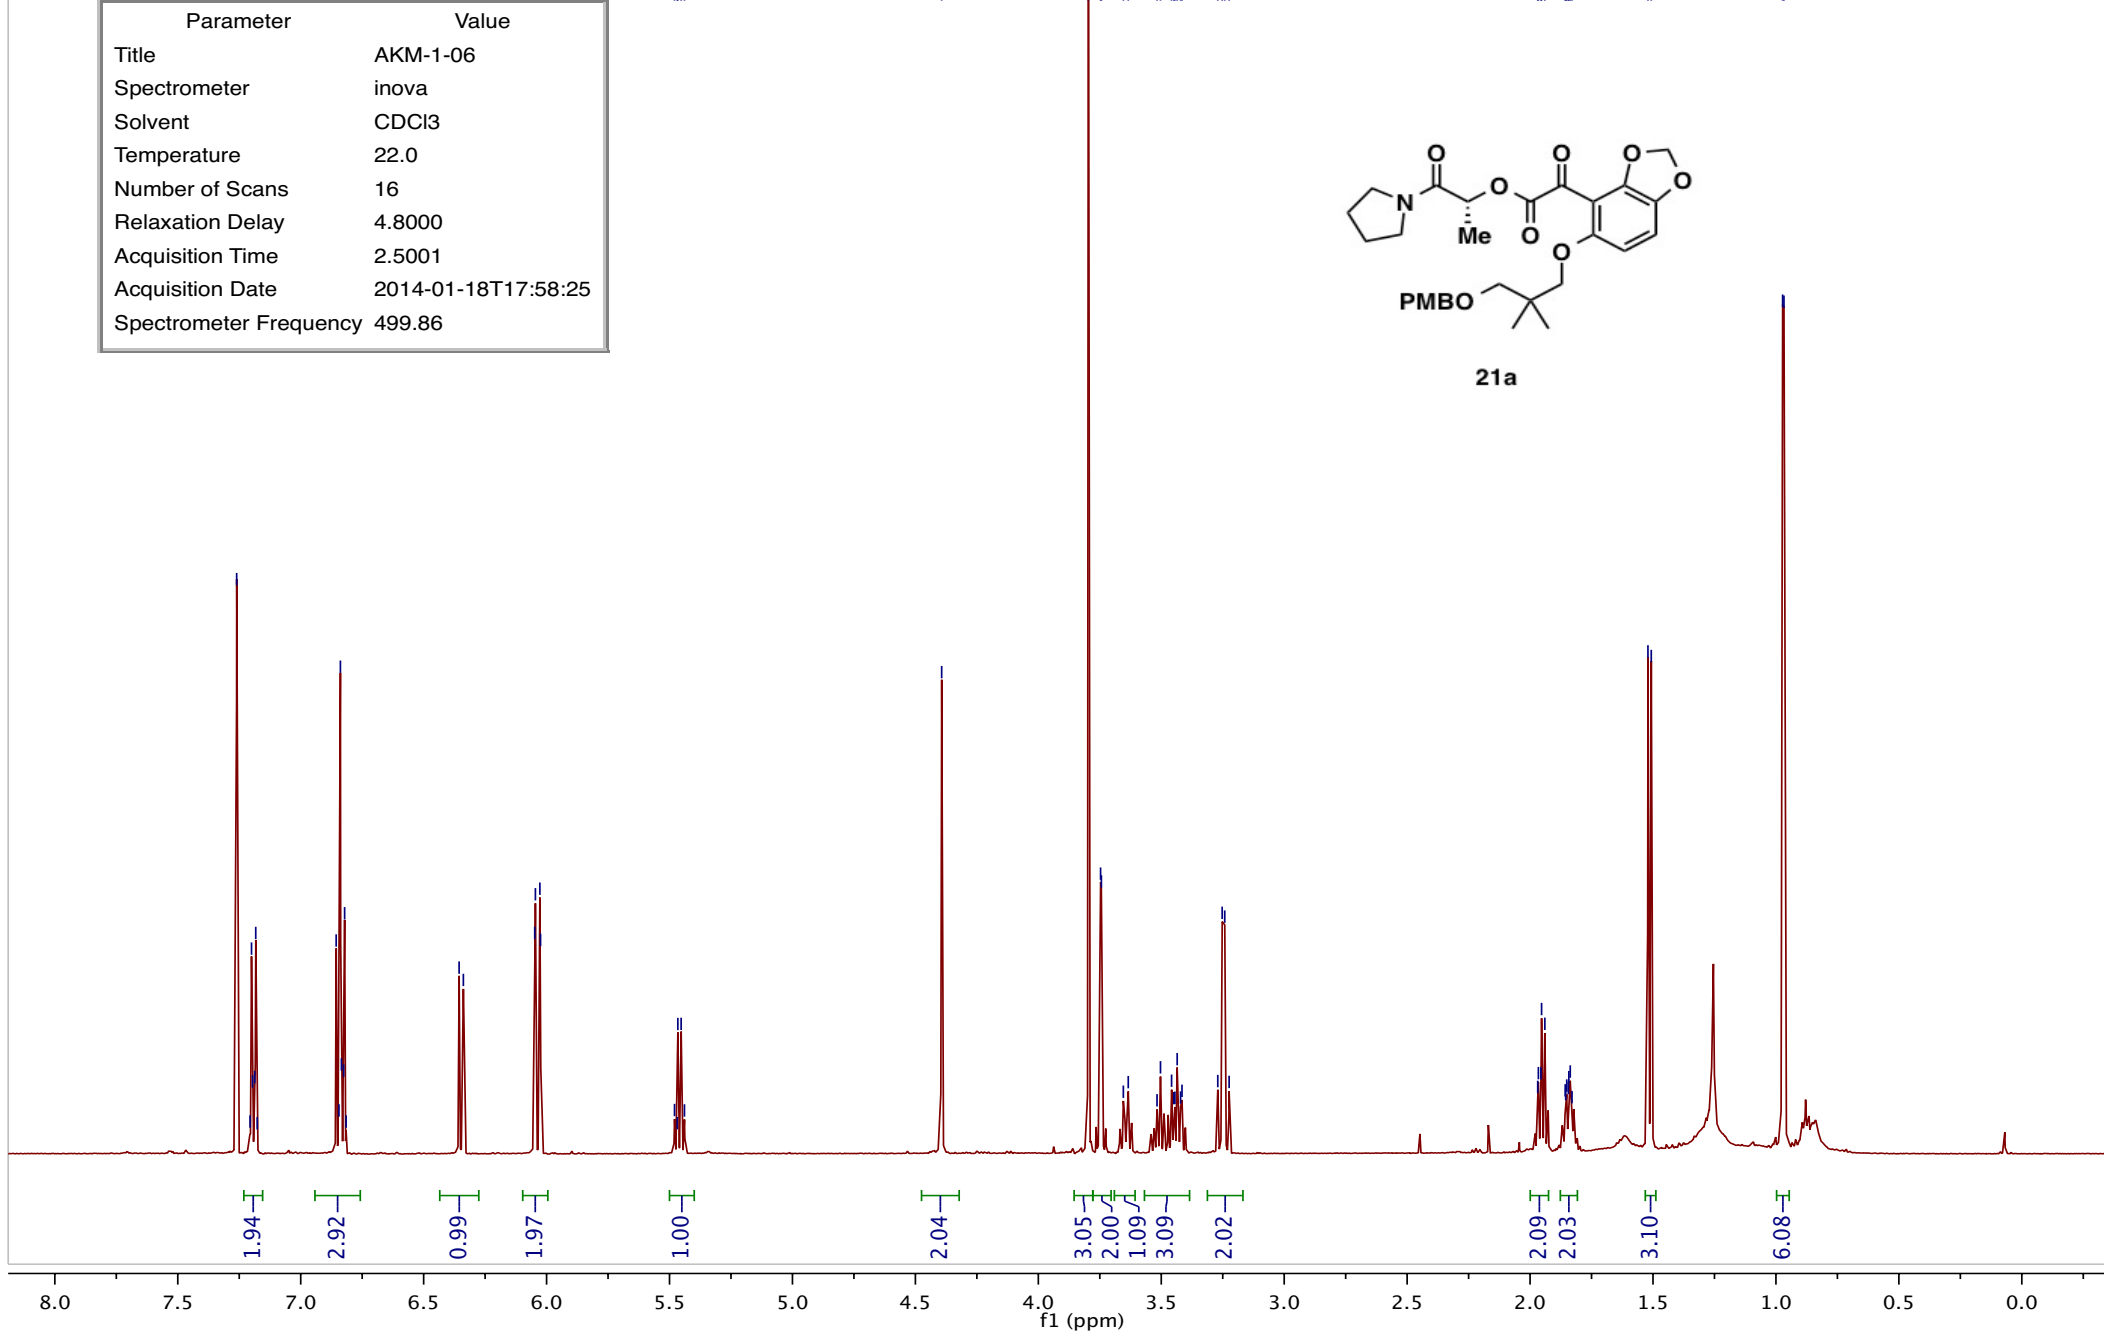

8.0 7.5 7.0 6.5 6.0 5.5 5.0 4.5 4.0 3.5 3.0 2.5 2.0 1.5 1.0 0.5 0.0



| Parameter              | Value               |
|------------------------|---------------------|
| Title                  | AKM-03-74.13C       |
| Spectrometer           | inova               |
| Solvent                | cdcl3               |
| Temperature            | 25.0                |
| Number of Scans        | 1372                |
| Relaxation Delay       | 1.0000              |
| Acquisition Time       | 1.2987              |
| Acquisition Date       | 2014-09-09T19:57:45 |
| Spectrometer Frequency | 150.79              |

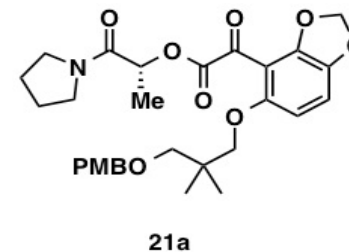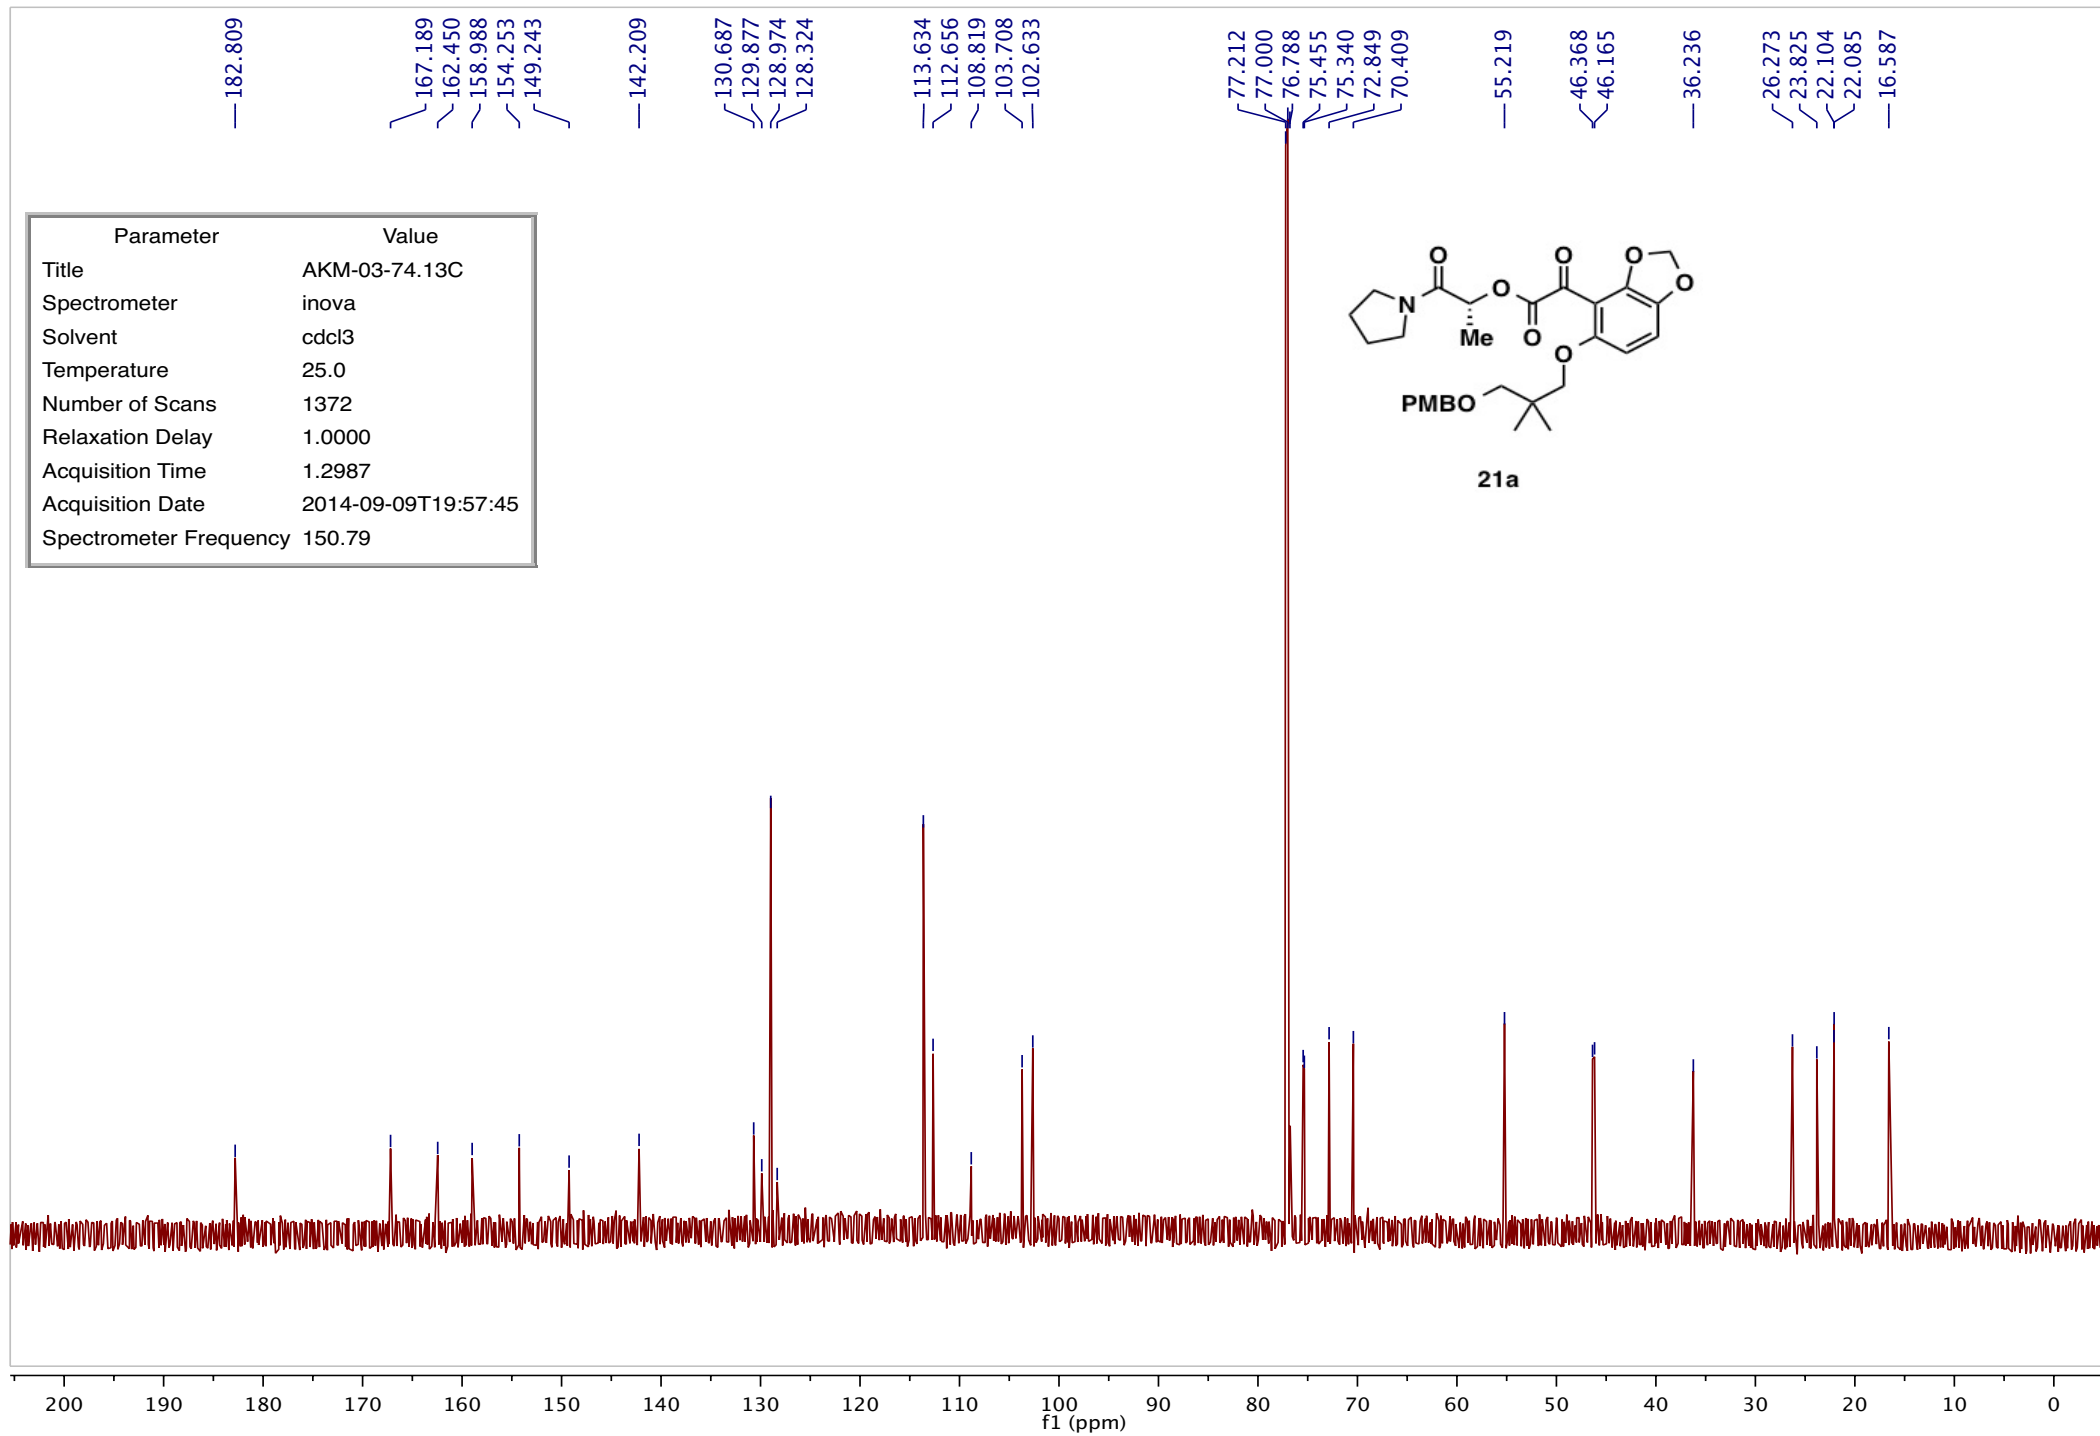

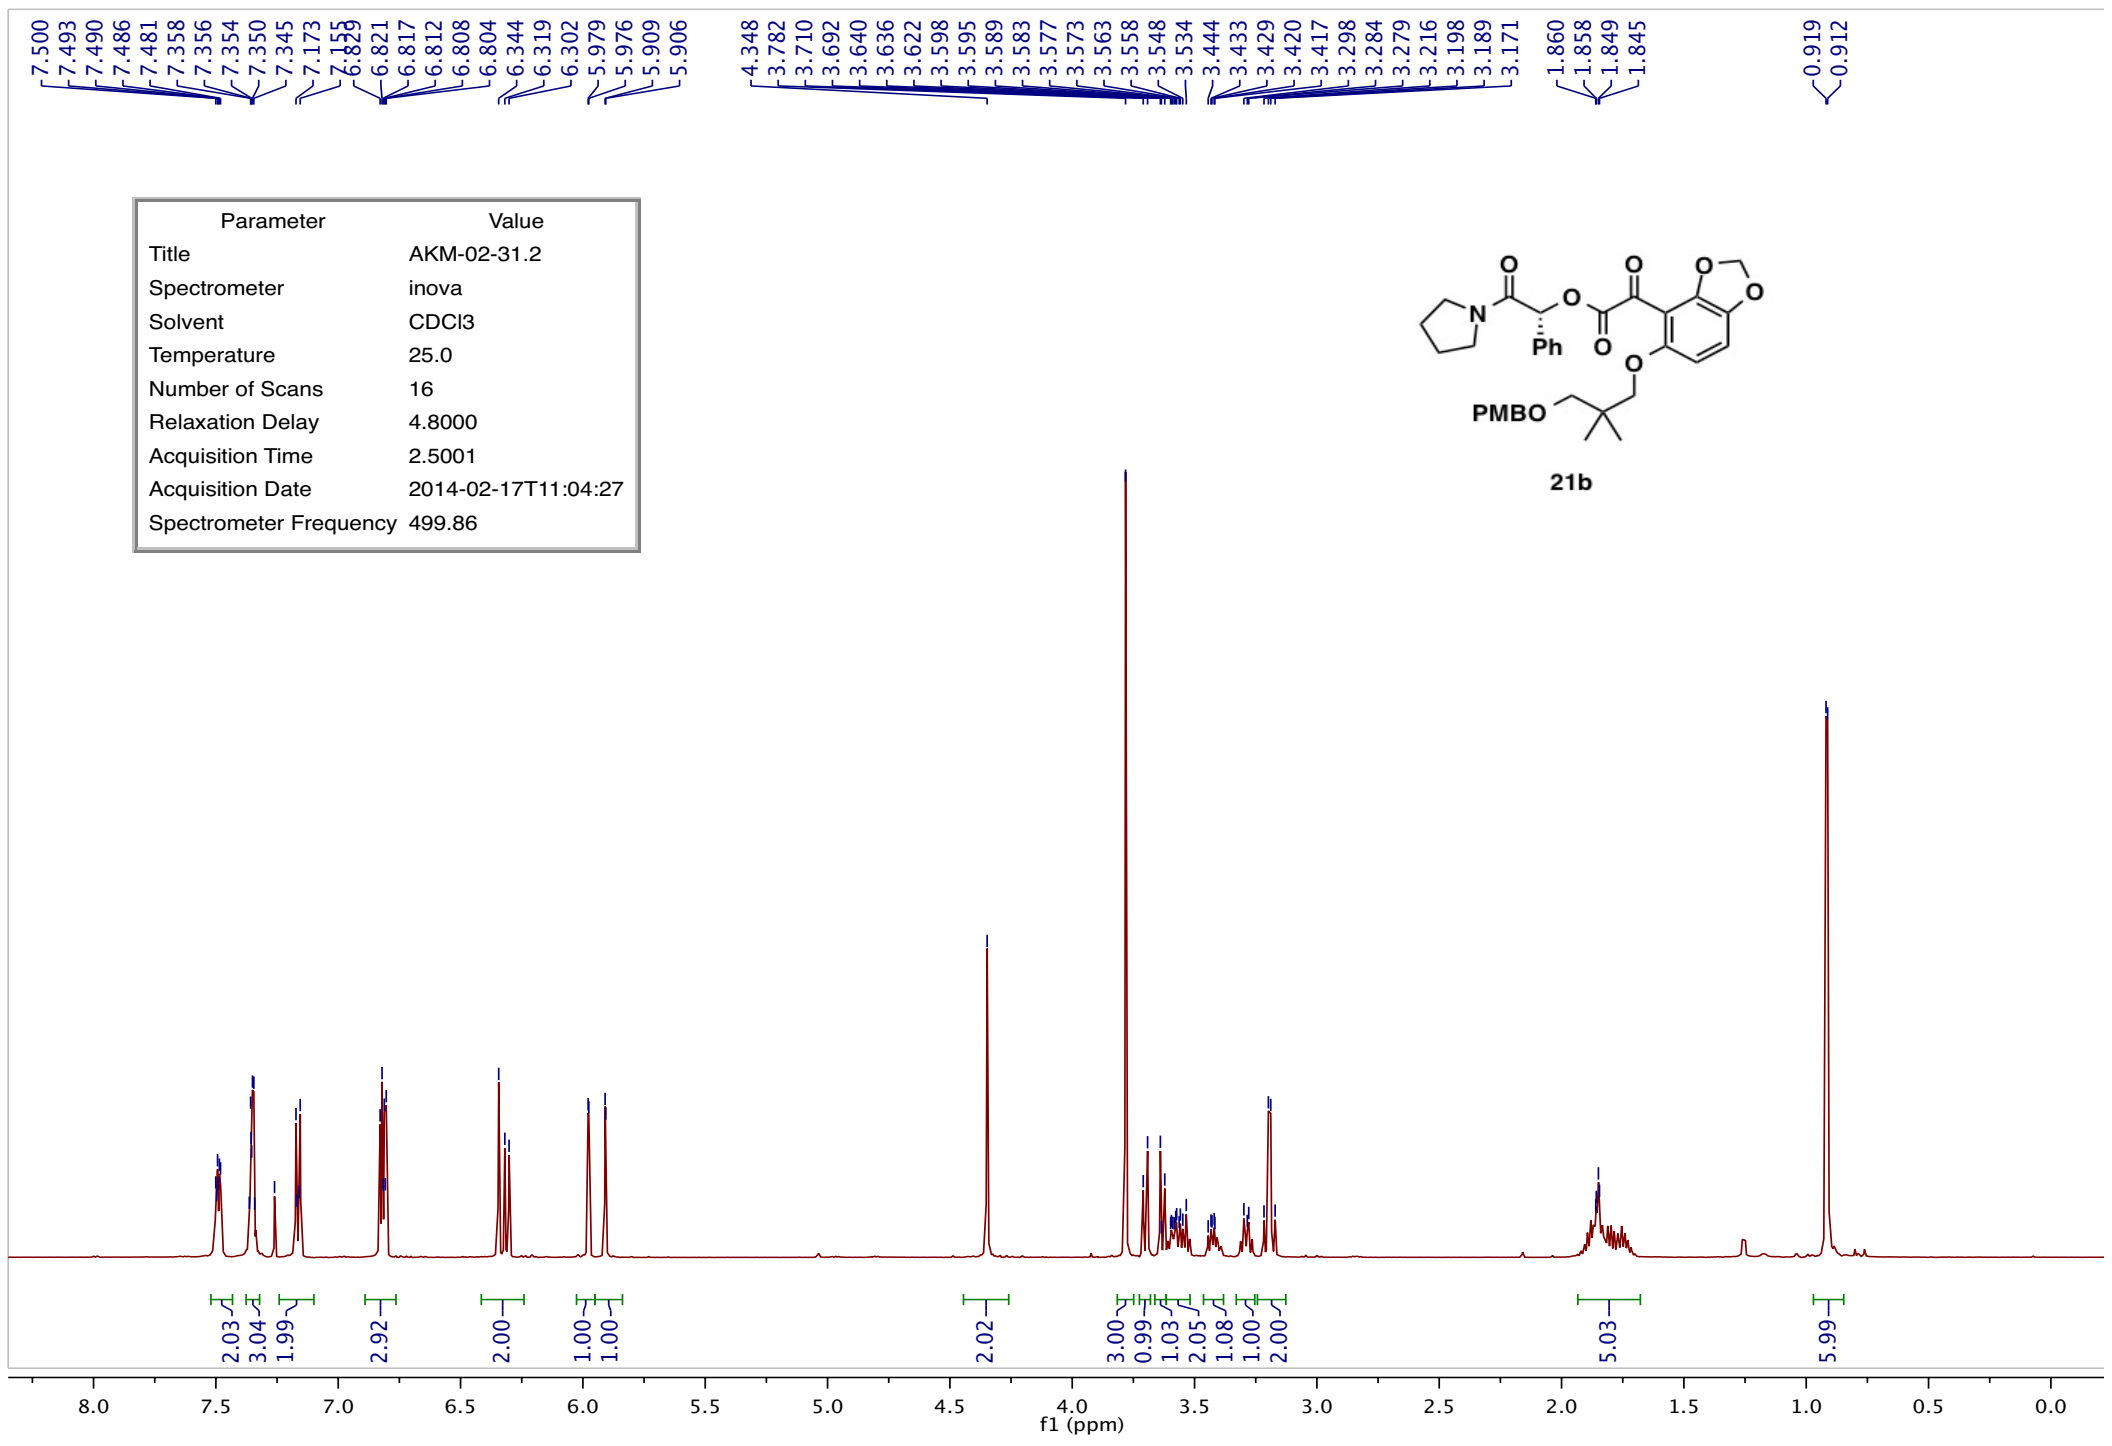

| Parameter              | Value               |
|------------------------|---------------------|
| Title                  | AKM-02-31.2         |
| Spectrometer           | inova               |
| Solvent                | CDCl3               |
| Temperature            | 25.0                |
| Number of Scans        | 16                  |
| Relaxation Delay       | 4.8000              |
| Acquisition Time       | 2.5001              |
| Acquisition Date       | 2014-02-17T11:04:27 |
| Spectrometer Frequency | 499.86              |

7.500  
7.493  
7.490  
7.486  
7.481  
7.358  
7.356  
7.354  
7.350  
7.345  
7.173  
7.155  
6.821  
6.817  
6.812  
6.808  
6.804  
6.344  
6.319  
6.302  
5.979  
5.976  
5.909  
5.906

4.348  
3.782  
3.710  
3.692  
3.640  
3.636  
3.622  
3.598  
3.595  
3.589  
3.583  
3.577  
3.573  
3.563  
3.558  
3.548  
3.534  
3.444  
3.433  
3.429  
3.420  
3.417  
3.298  
3.284  
3.279  
3.216  
3.198  
3.189  
3.171  
1.860  
1.858  
1.849  
1.845

0.919  
0.912

2.03  
3.04  
1.99  
2.92  
2.00  
1.00  
1.00  
2.02  
3.00  
0.99  
1.03  
2.05  
1.08  
1.00  
2.00  
5.03  
5.99

f1 (ppm)

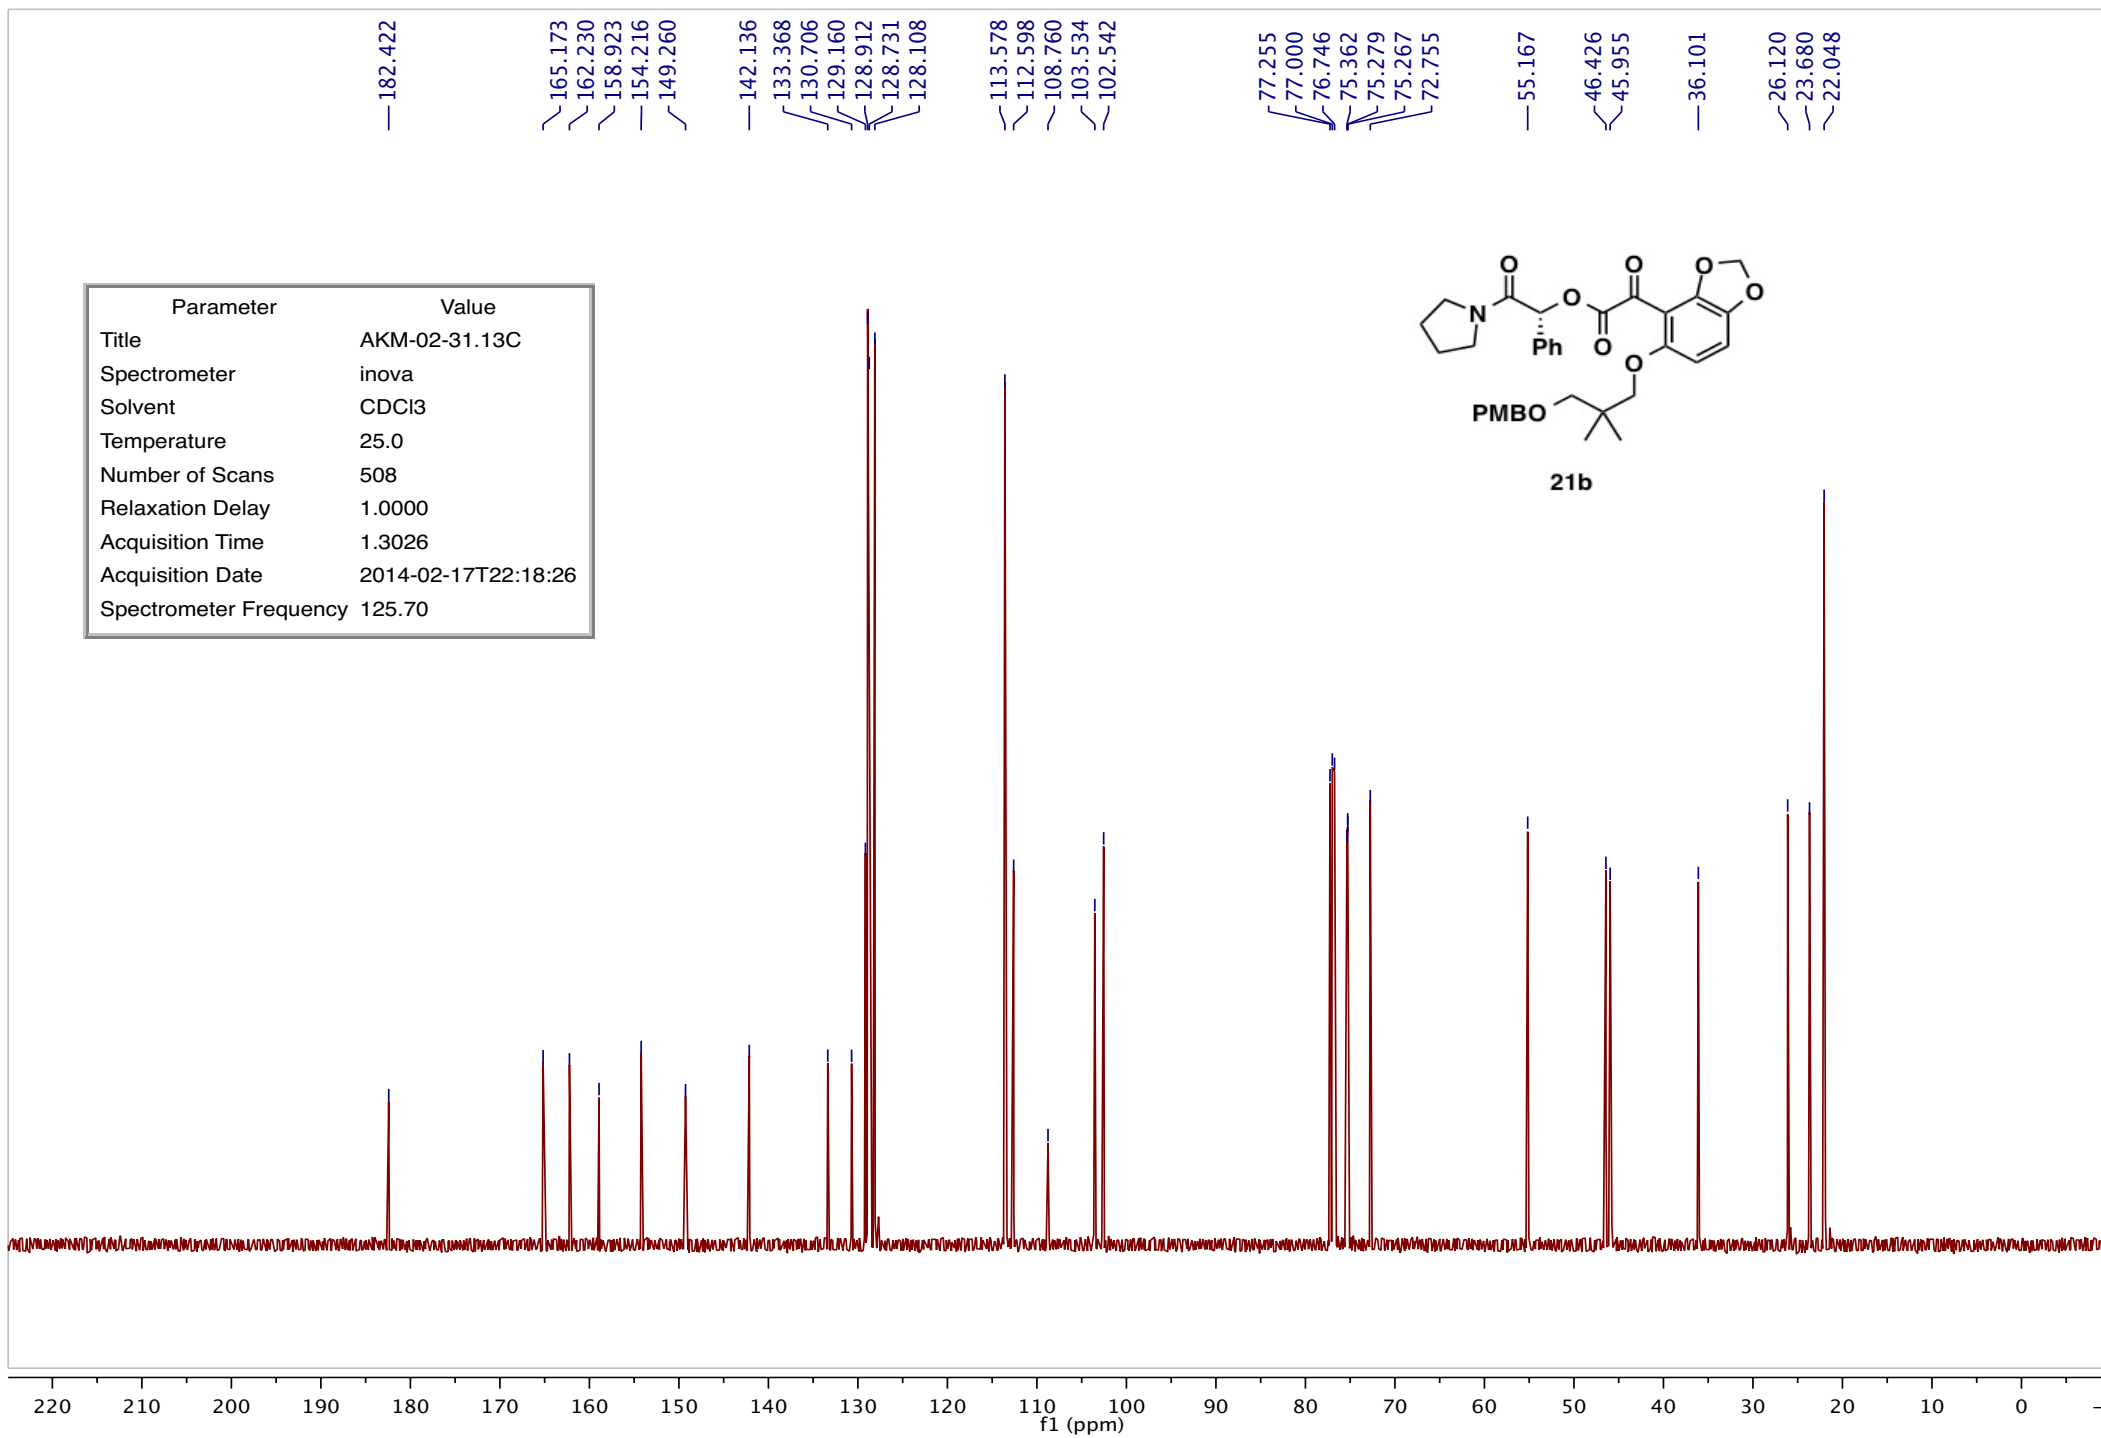

182.422

165.173  
162.230  
158.923  
154.216  
149.260

142.136  
133.368  
130.706  
129.160  
128.912  
128.731  
128.108

113.578  
112.598  
108.760  
103.534  
102.542

77.255  
77.000  
76.746  
75.362  
75.279  
75.267  
72.755

55.167

46.426  
45.955

36.101

26.120  
23.680  
22.048

| Parameter              | Value               |
|------------------------|---------------------|
| Title                  | AKM-02-31.13C       |
| Spectrometer           | inova               |
| Solvent                | CDCl3               |
| Temperature            | 25.0                |
| Number of Scans        | 508                 |
| Relaxation Delay       | 1.0000              |
| Acquisition Time       | 1.3026              |
| Acquisition Date       | 2014-02-17T22:18:26 |
| Spectrometer Frequency | 125.70              |

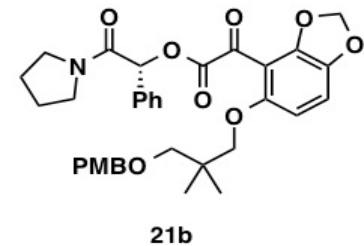

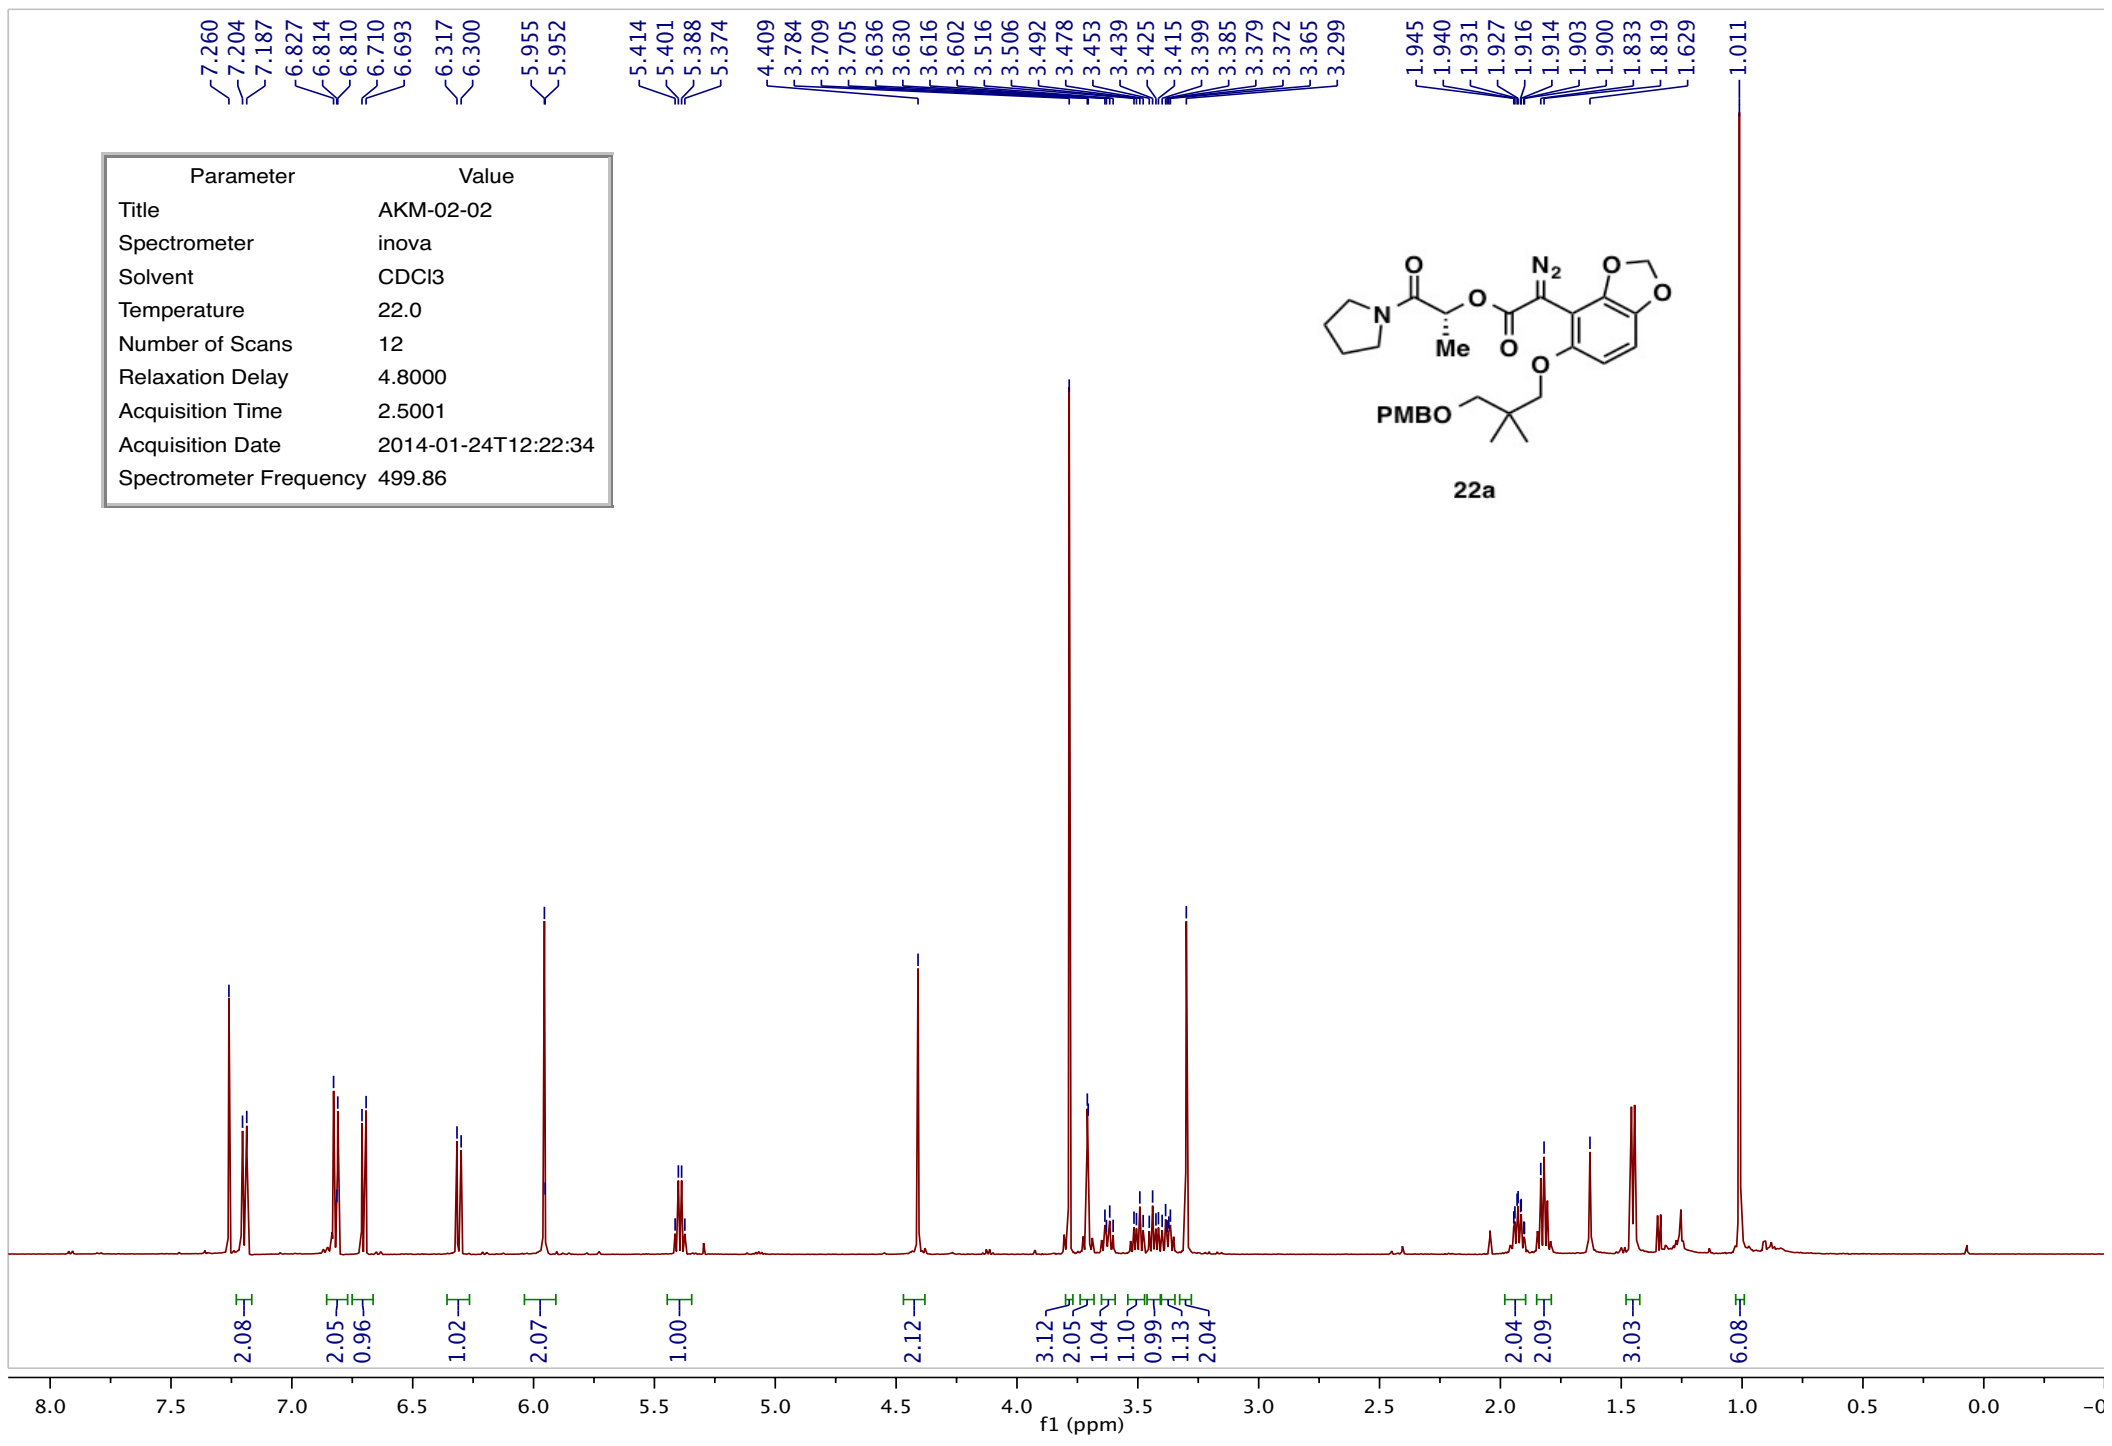

| Parameter              | Value               |
|------------------------|---------------------|
| Title                  | AKM-02-14.13C       |
| Spectrometer           | inova               |
| Solvent                | CDCl3               |
| Temperature            | 25.0                |
| Number of Scans        | 356                 |
| Relaxation Delay       | 1.0000              |
| Acquisition Time       | 1.3026              |
| Acquisition Date       | 2014-02-26T17:17:47 |
| Spectrometer Frequency | 125.70              |

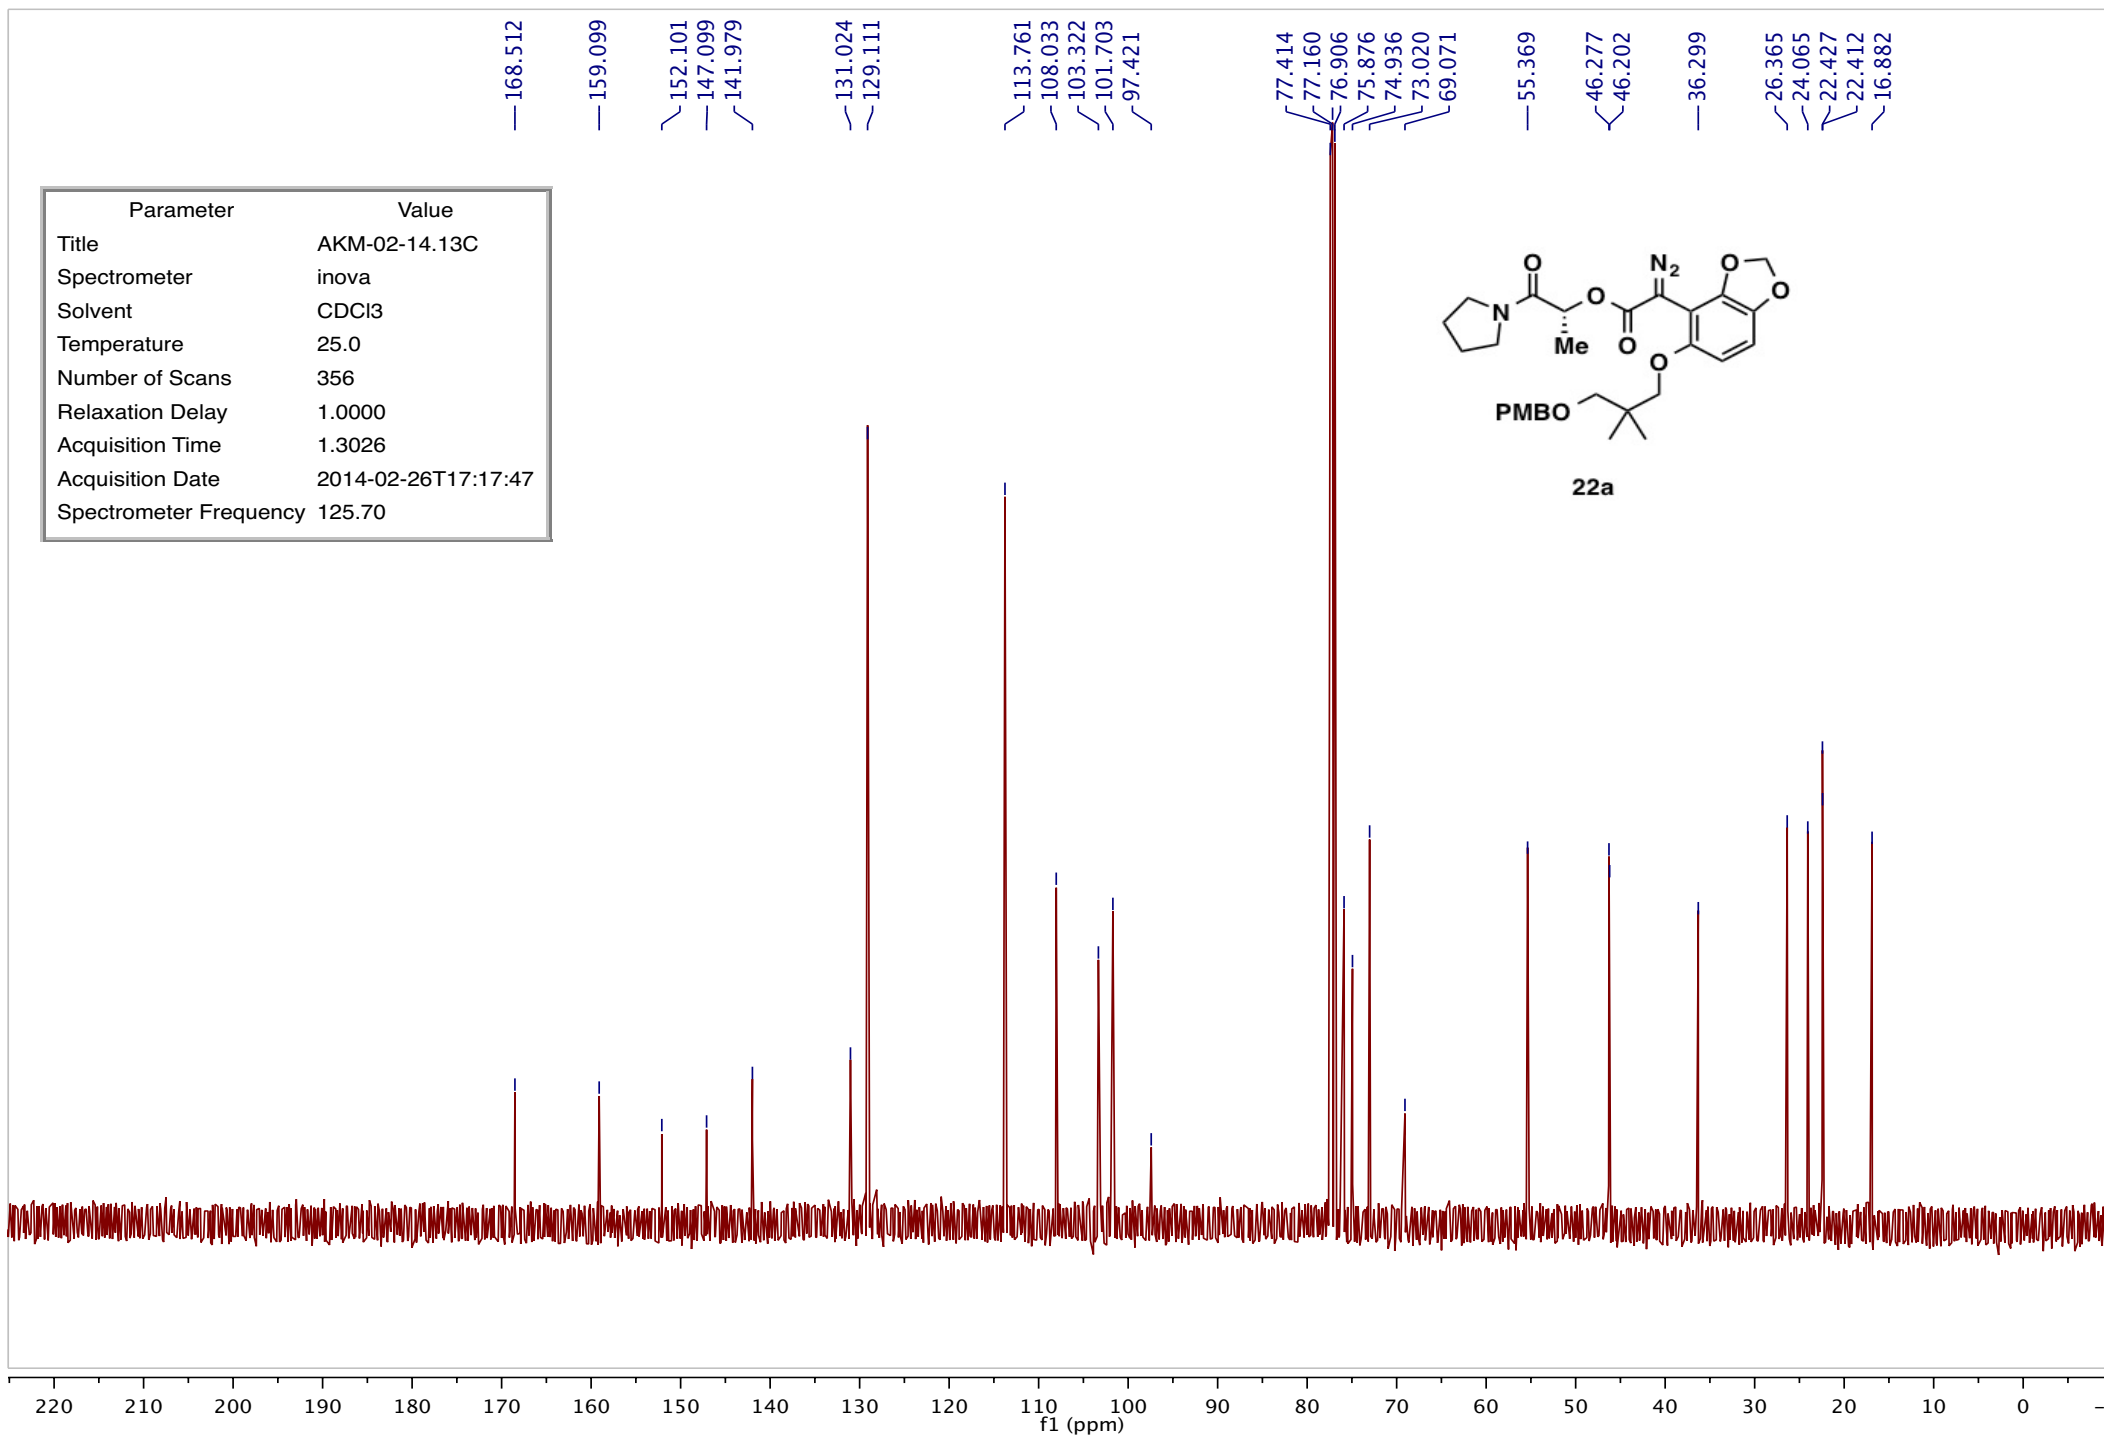

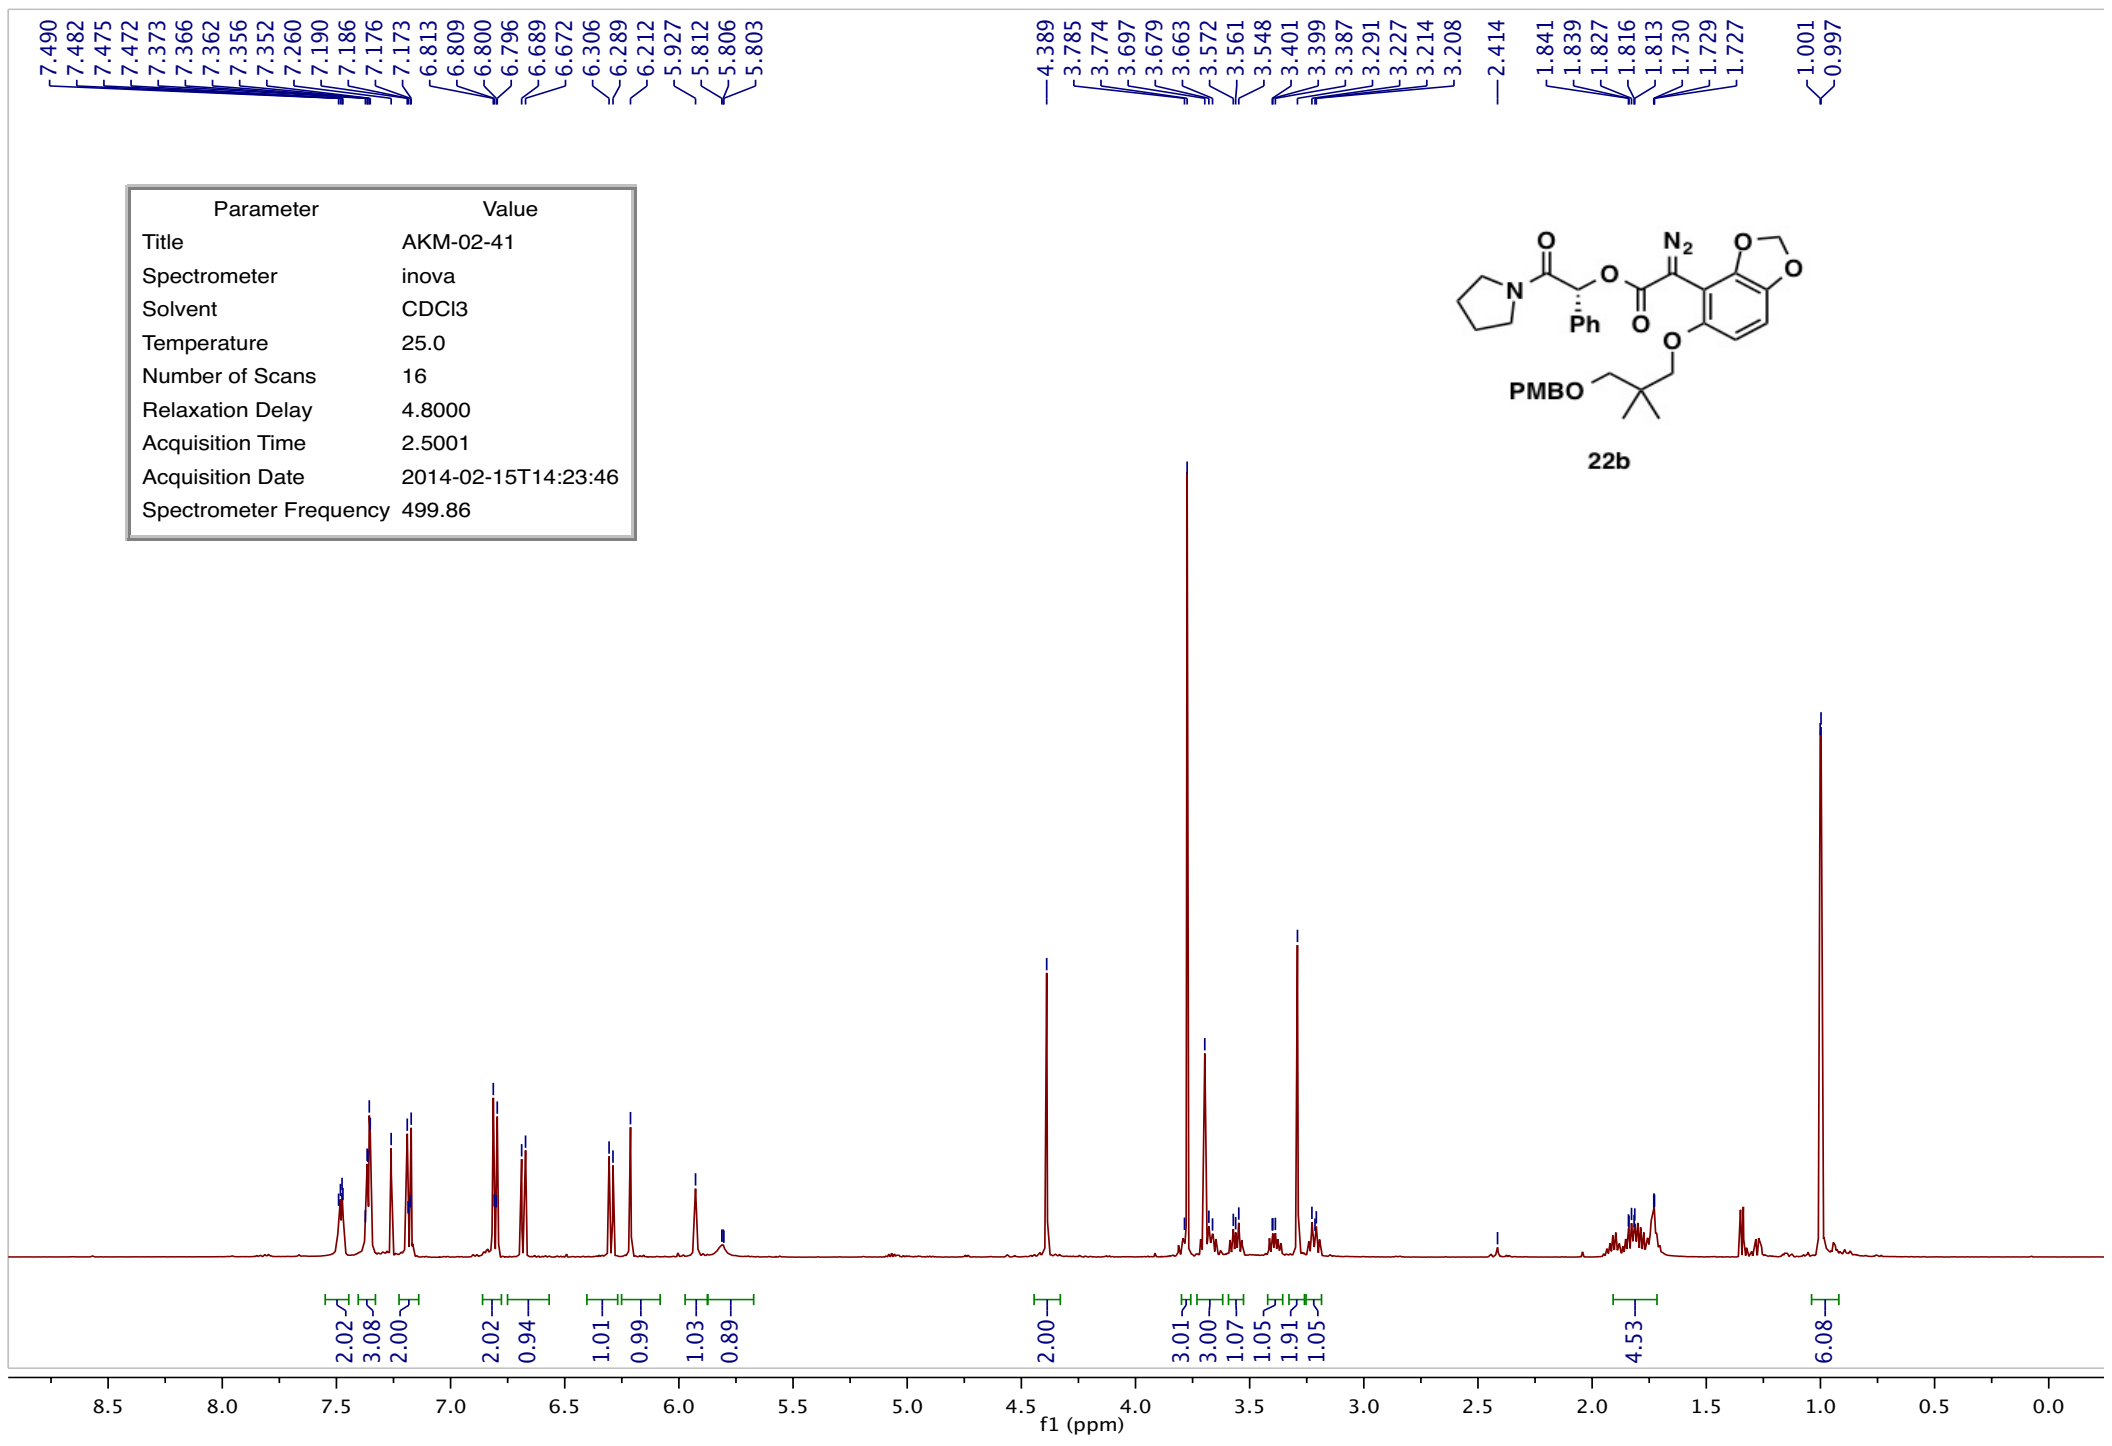

7.490  
7.482  
7.475  
7.472  
7.373  
7.366  
7.362  
7.356  
7.352  
7.260  
7.190  
7.186  
7.176  
7.173  
6.813  
6.809  
6.800  
6.796  
6.689  
6.672  
6.306  
6.289  
6.212  
5.927  
5.812  
5.806  
5.803

4.389  
3.785  
3.774  
3.697  
3.679  
3.663  
3.572  
3.561  
3.548  
3.401  
3.399  
3.387  
3.291  
3.227  
3.214  
3.208  
2.414  
1.841  
1.839  
1.827  
1.816  
1.813  
1.730  
1.729  
1.727  
1.001  
0.997

| Parameter              | Value               |
|------------------------|---------------------|
| Title                  | AKM-02-41           |
| Spectrometer           | inova               |
| Solvent                | CDCl3               |
| Temperature            | 25.0                |
| Number of Scans        | 16                  |
| Relaxation Delay       | 4.8000              |
| Acquisition Time       | 2.5001              |
| Acquisition Date       | 2014-02-15T14:23:46 |
| Spectrometer Frequency | 499.86              |

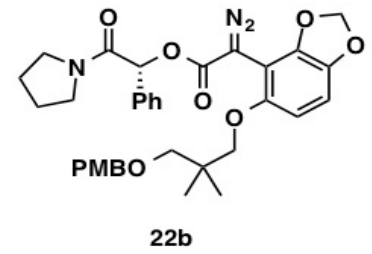

2.02  
3.08  
2.00  
2.02  
0.94  
1.01  
0.99  
1.03  
0.89  
2.00  
3.01  
3.00  
1.07  
1.05  
1.91  
1.05  
4.53  
6.08

8.5 8.0 7.5 7.0 6.5 6.0 5.5 5.0 4.5 4.0 3.5 3.0 2.5 2.0 1.5 1.0 0.5 0.0

| Parameter              | Value               |
|------------------------|---------------------|
| Title                  | AKM-02-41.13C       |
| Spectrometer           | inova               |
| Solvent                | CDCl3               |
| Temperature            | 25.0                |
| Number of Scans        | 764                 |
| Relaxation Delay       | 1.0000              |
| Acquisition Time       | 1.3026              |
| Acquisition Date       | 2014-02-15T20:18:55 |
| Spectrometer Frequency | 125.70              |

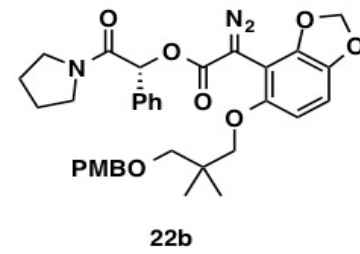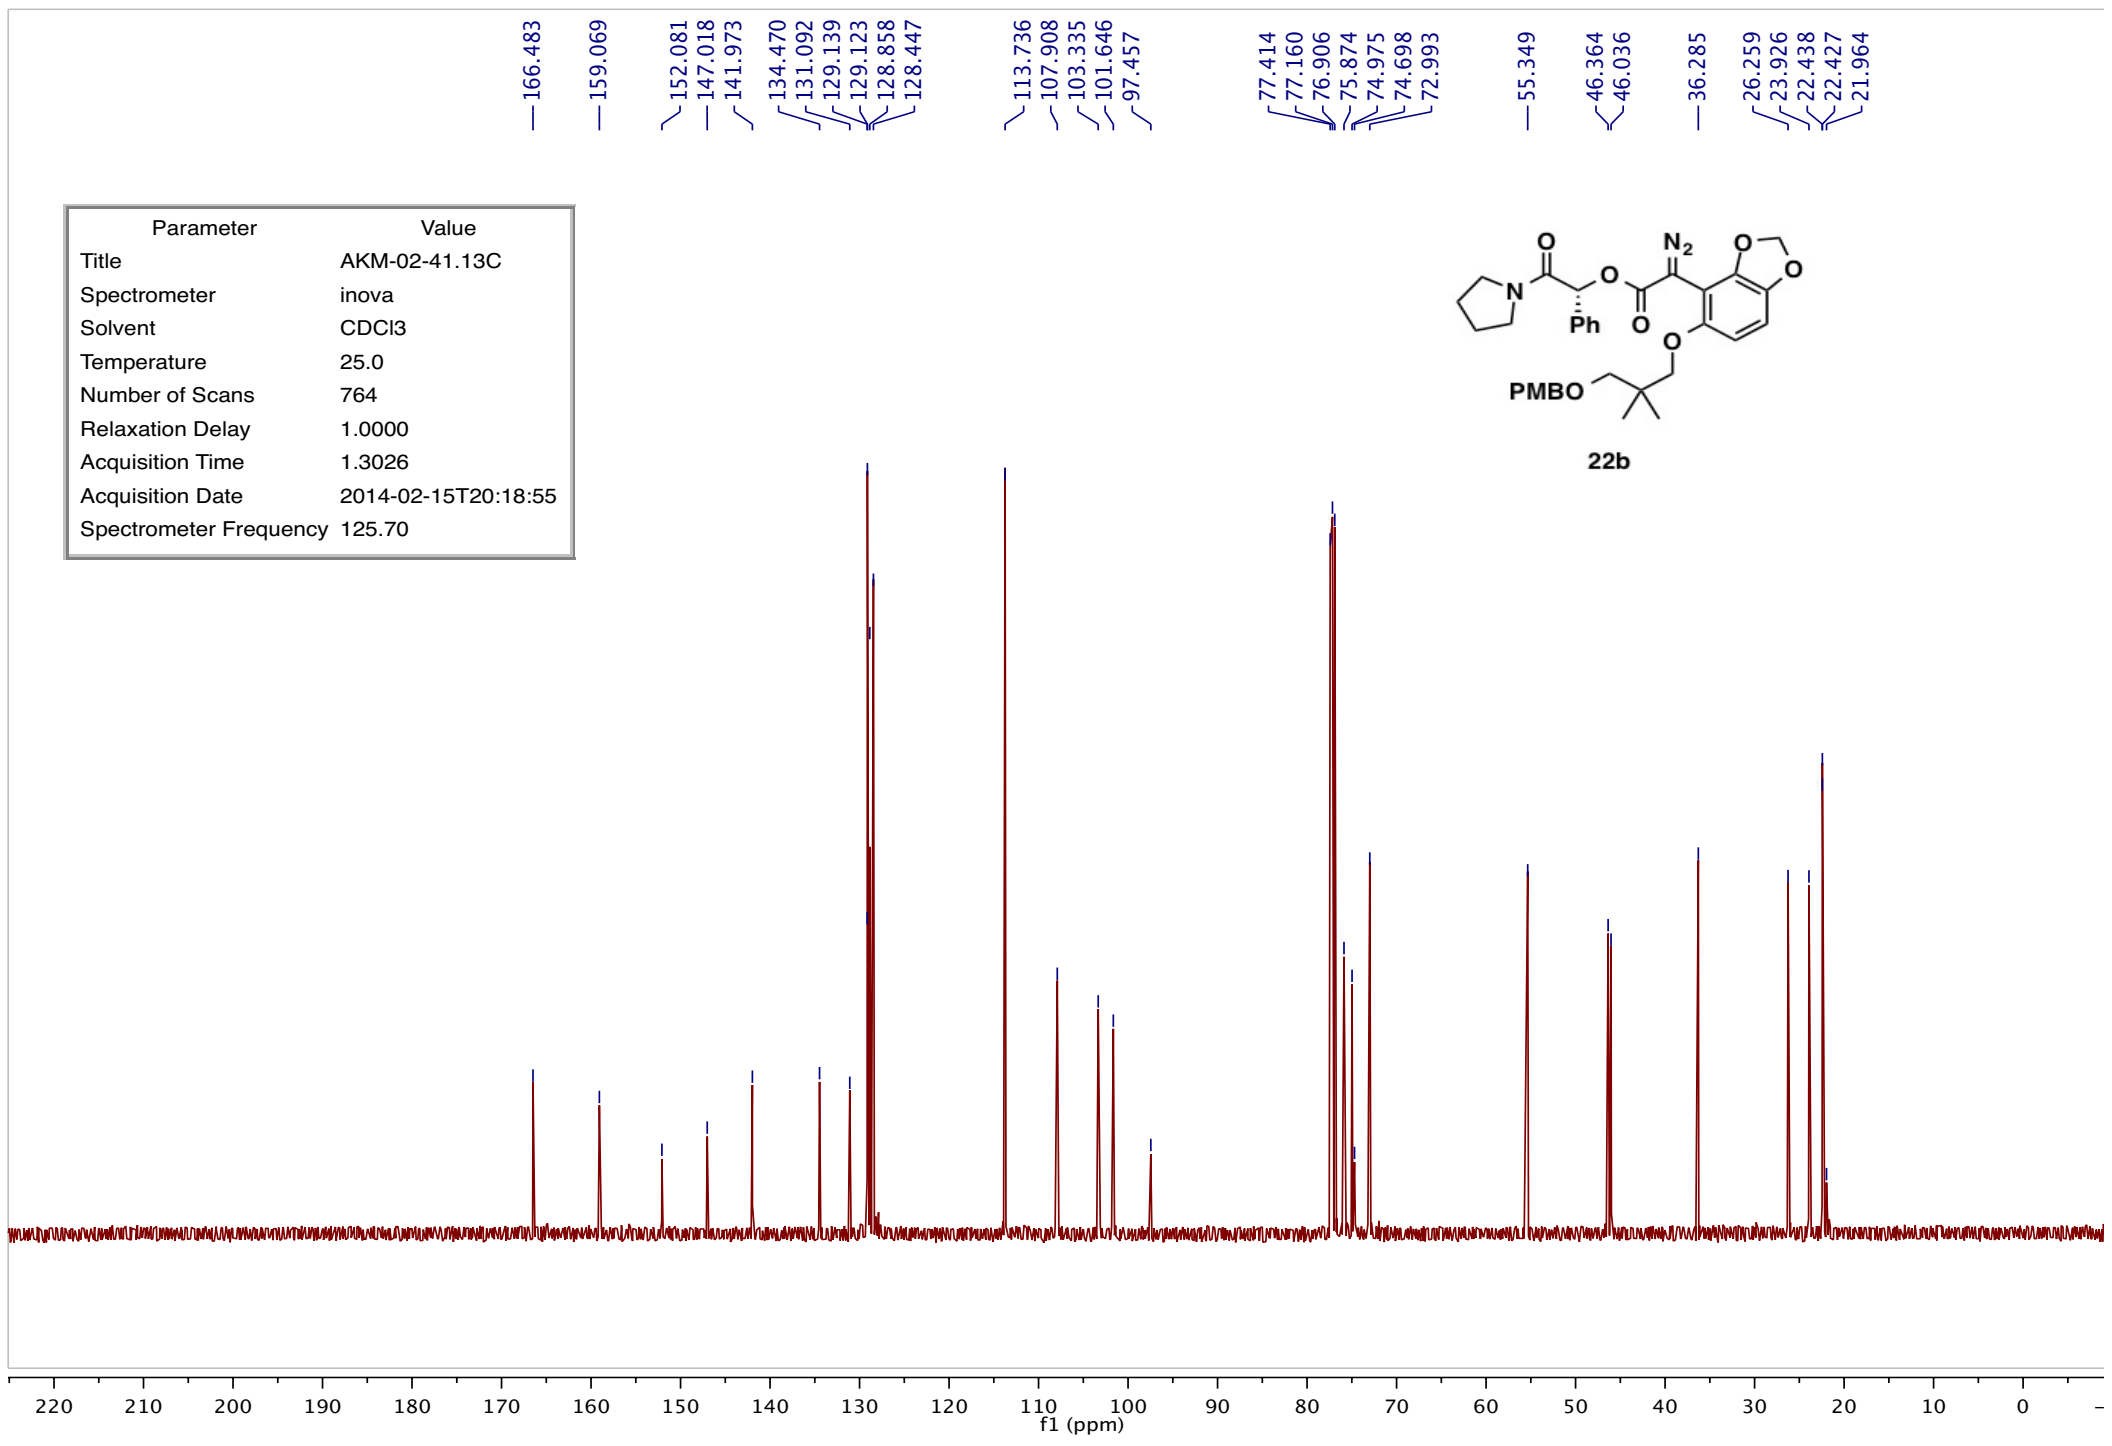

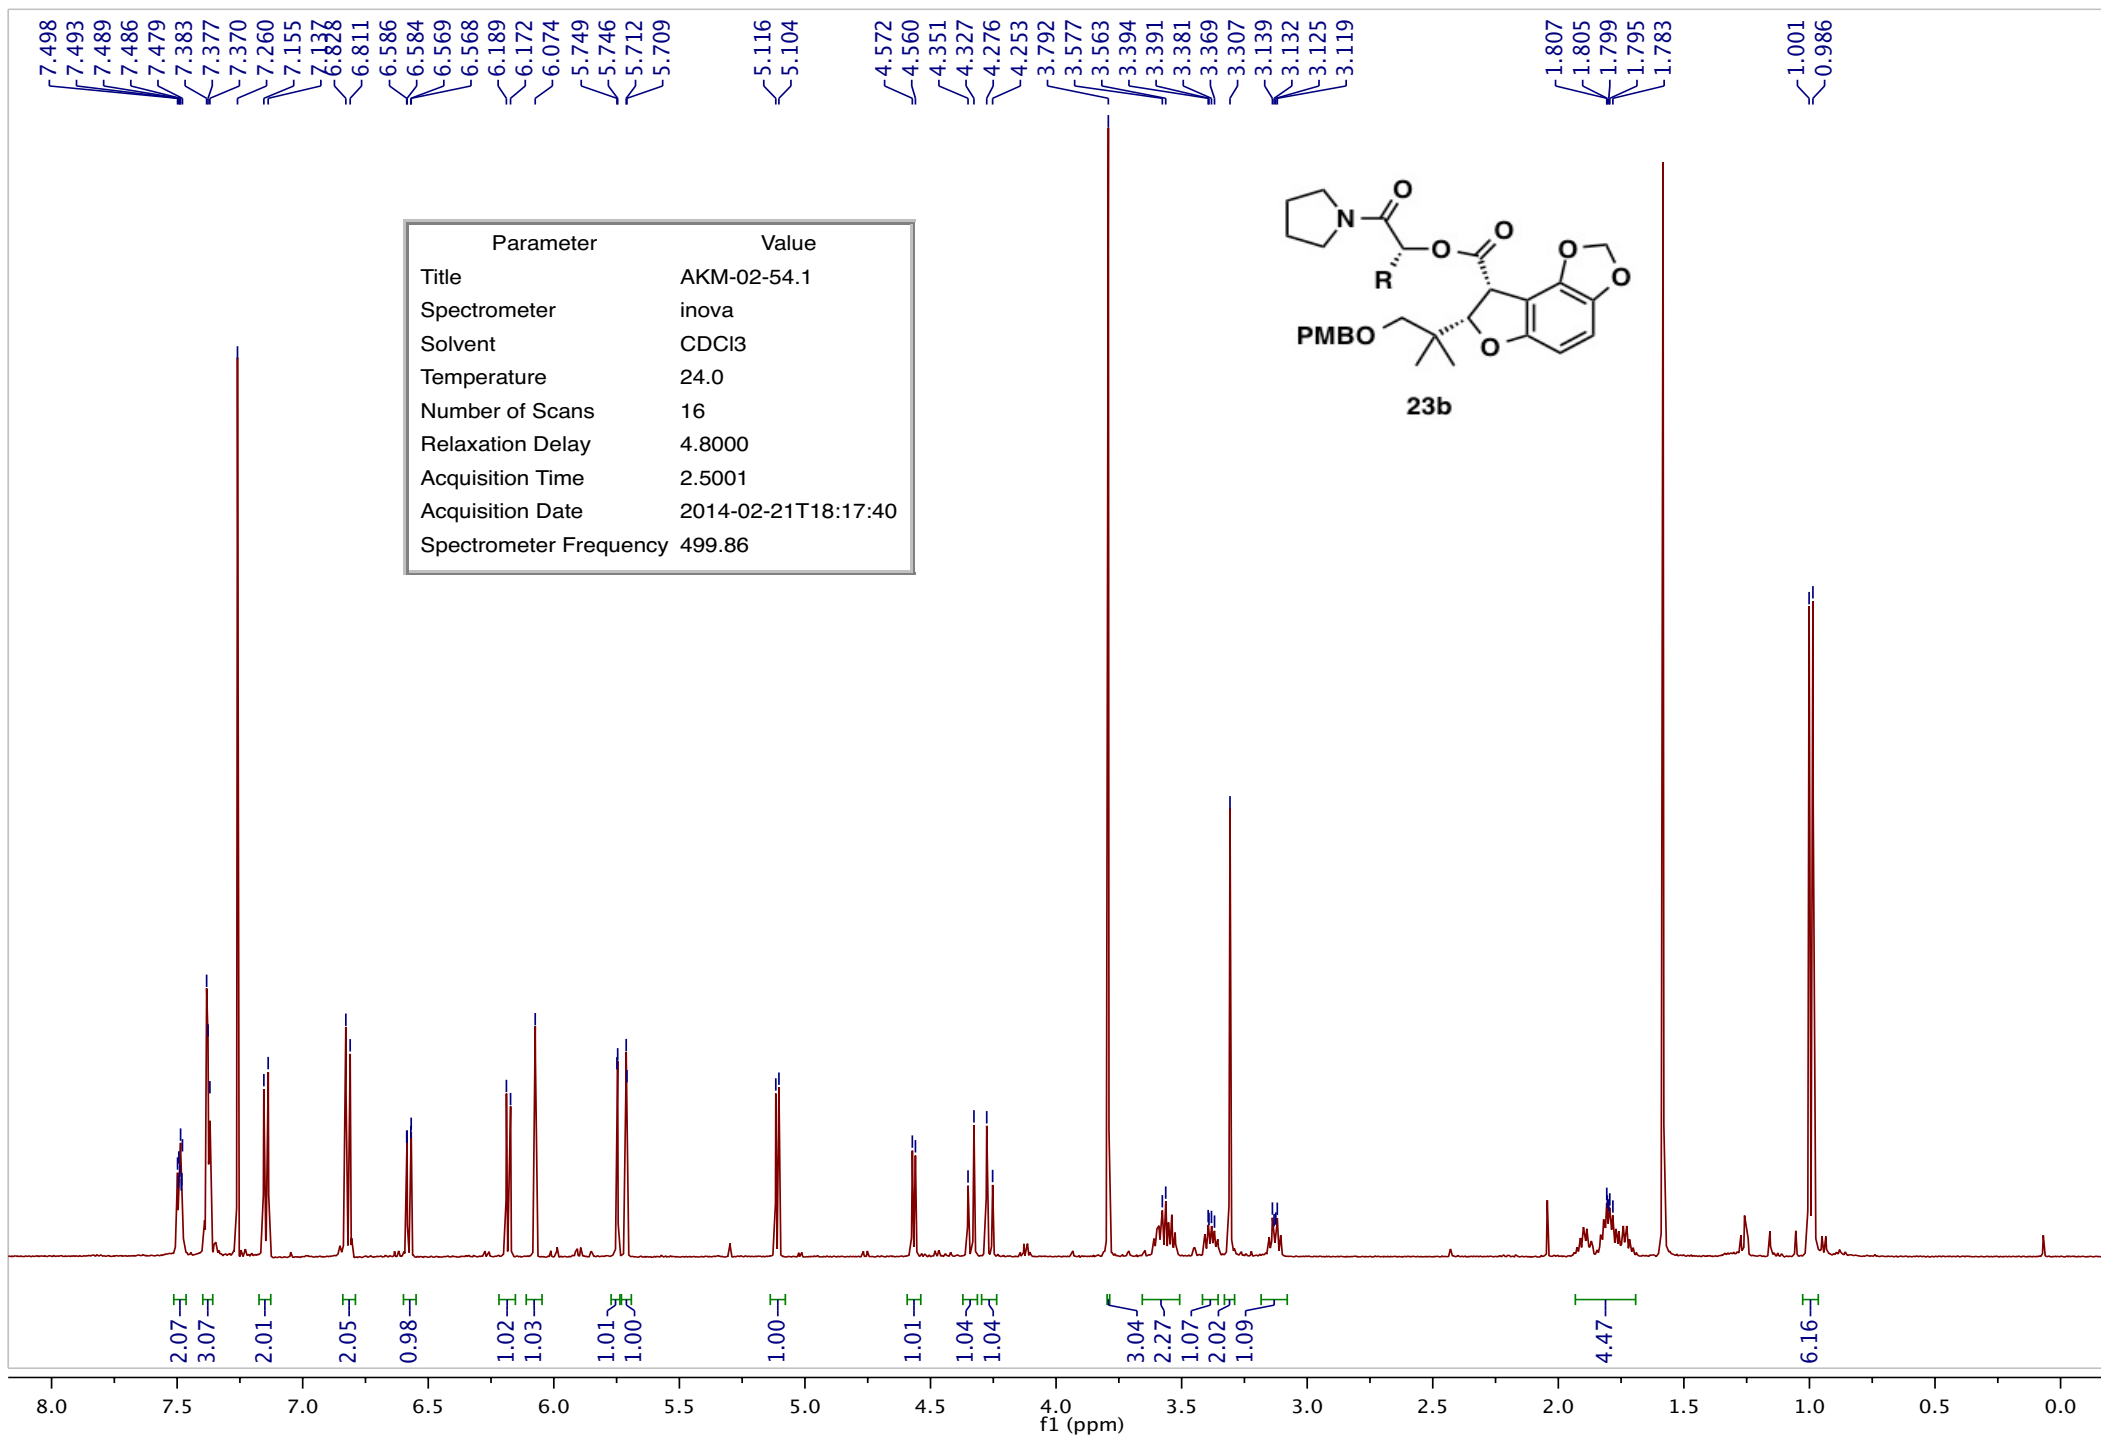



| Parameter              | Value                    |
|------------------------|--------------------------|
| Title                  | AKM-02-242.2purified.13C |
| Spectrometer           | inova                    |
| Solvent                | CDCl3                    |
| Temperature            | 80.0                     |
| Number of Scans        | 116                      |
| Relaxation Delay       | 1.0000                   |
| Acquisition Time       | 1.3026                   |
| Acquisition Date       | 2014-06-19T12:52:12      |
| Spectrometer Frequency | 125.70                   |

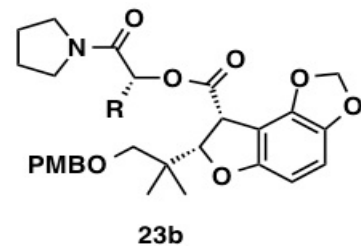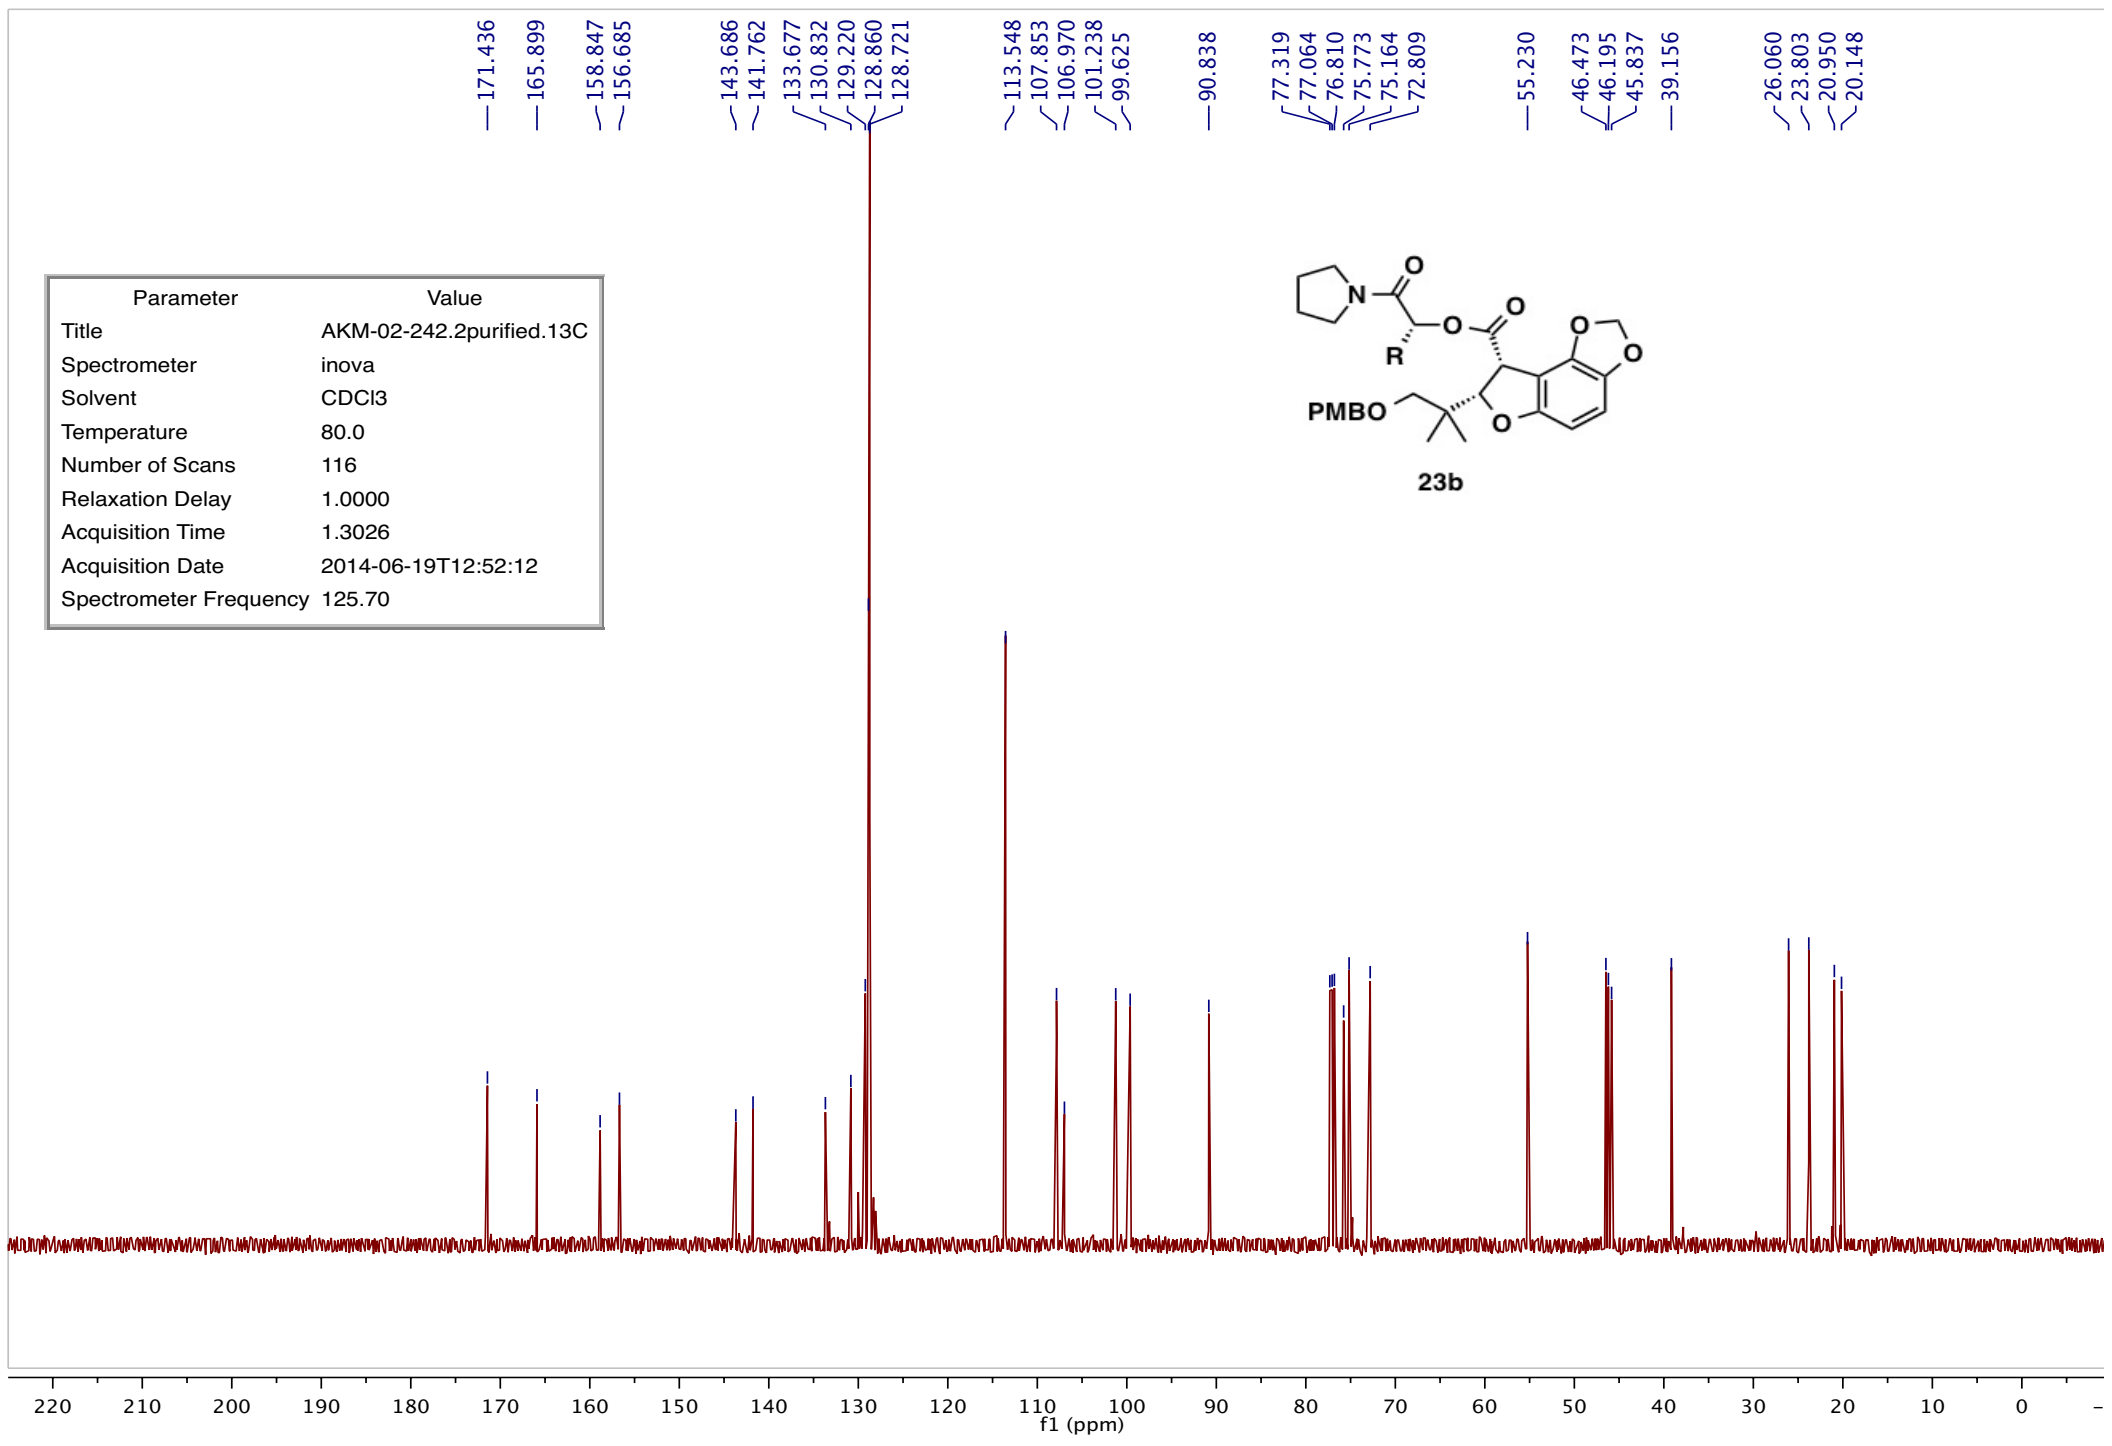

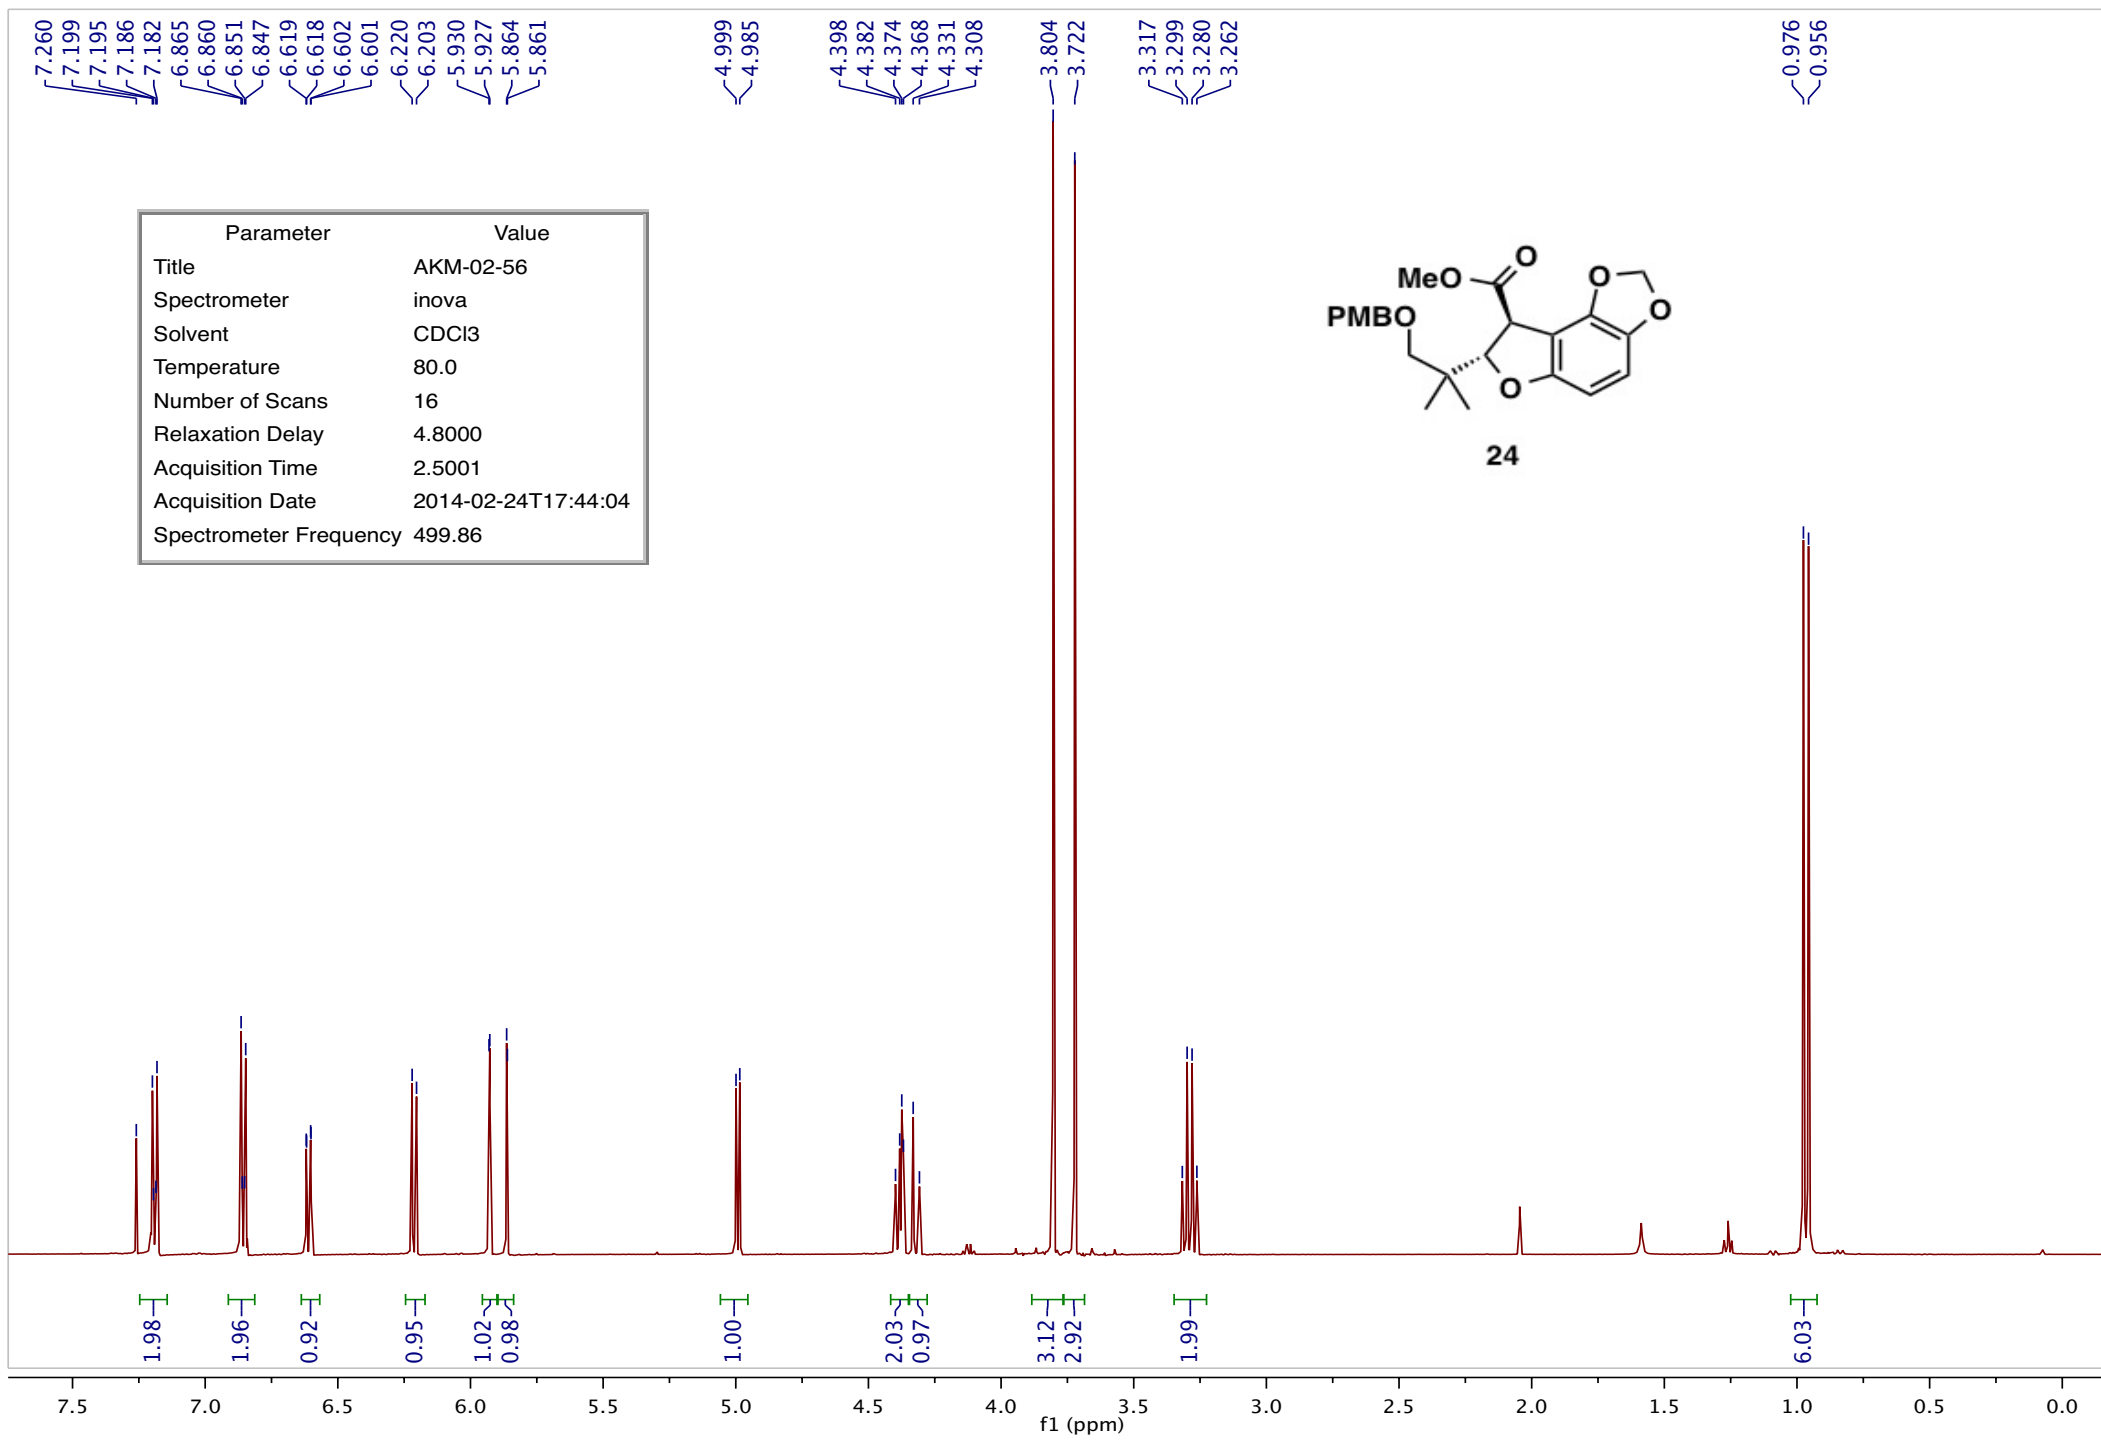

| Parameter              | Value               |
|------------------------|---------------------|
| Title                  | AKM-02-56           |
| Spectrometer           | inova               |
| Solvent                | CDCl <sub>3</sub>   |
| Temperature            | 80.0                |
| Number of Scans        | 16                  |
| Relaxation Delay       | 4.8000              |
| Acquisition Time       | 2.5001              |
| Acquisition Date       | 2014-02-24T17:44:04 |
| Spectrometer Frequency | 499.86              |

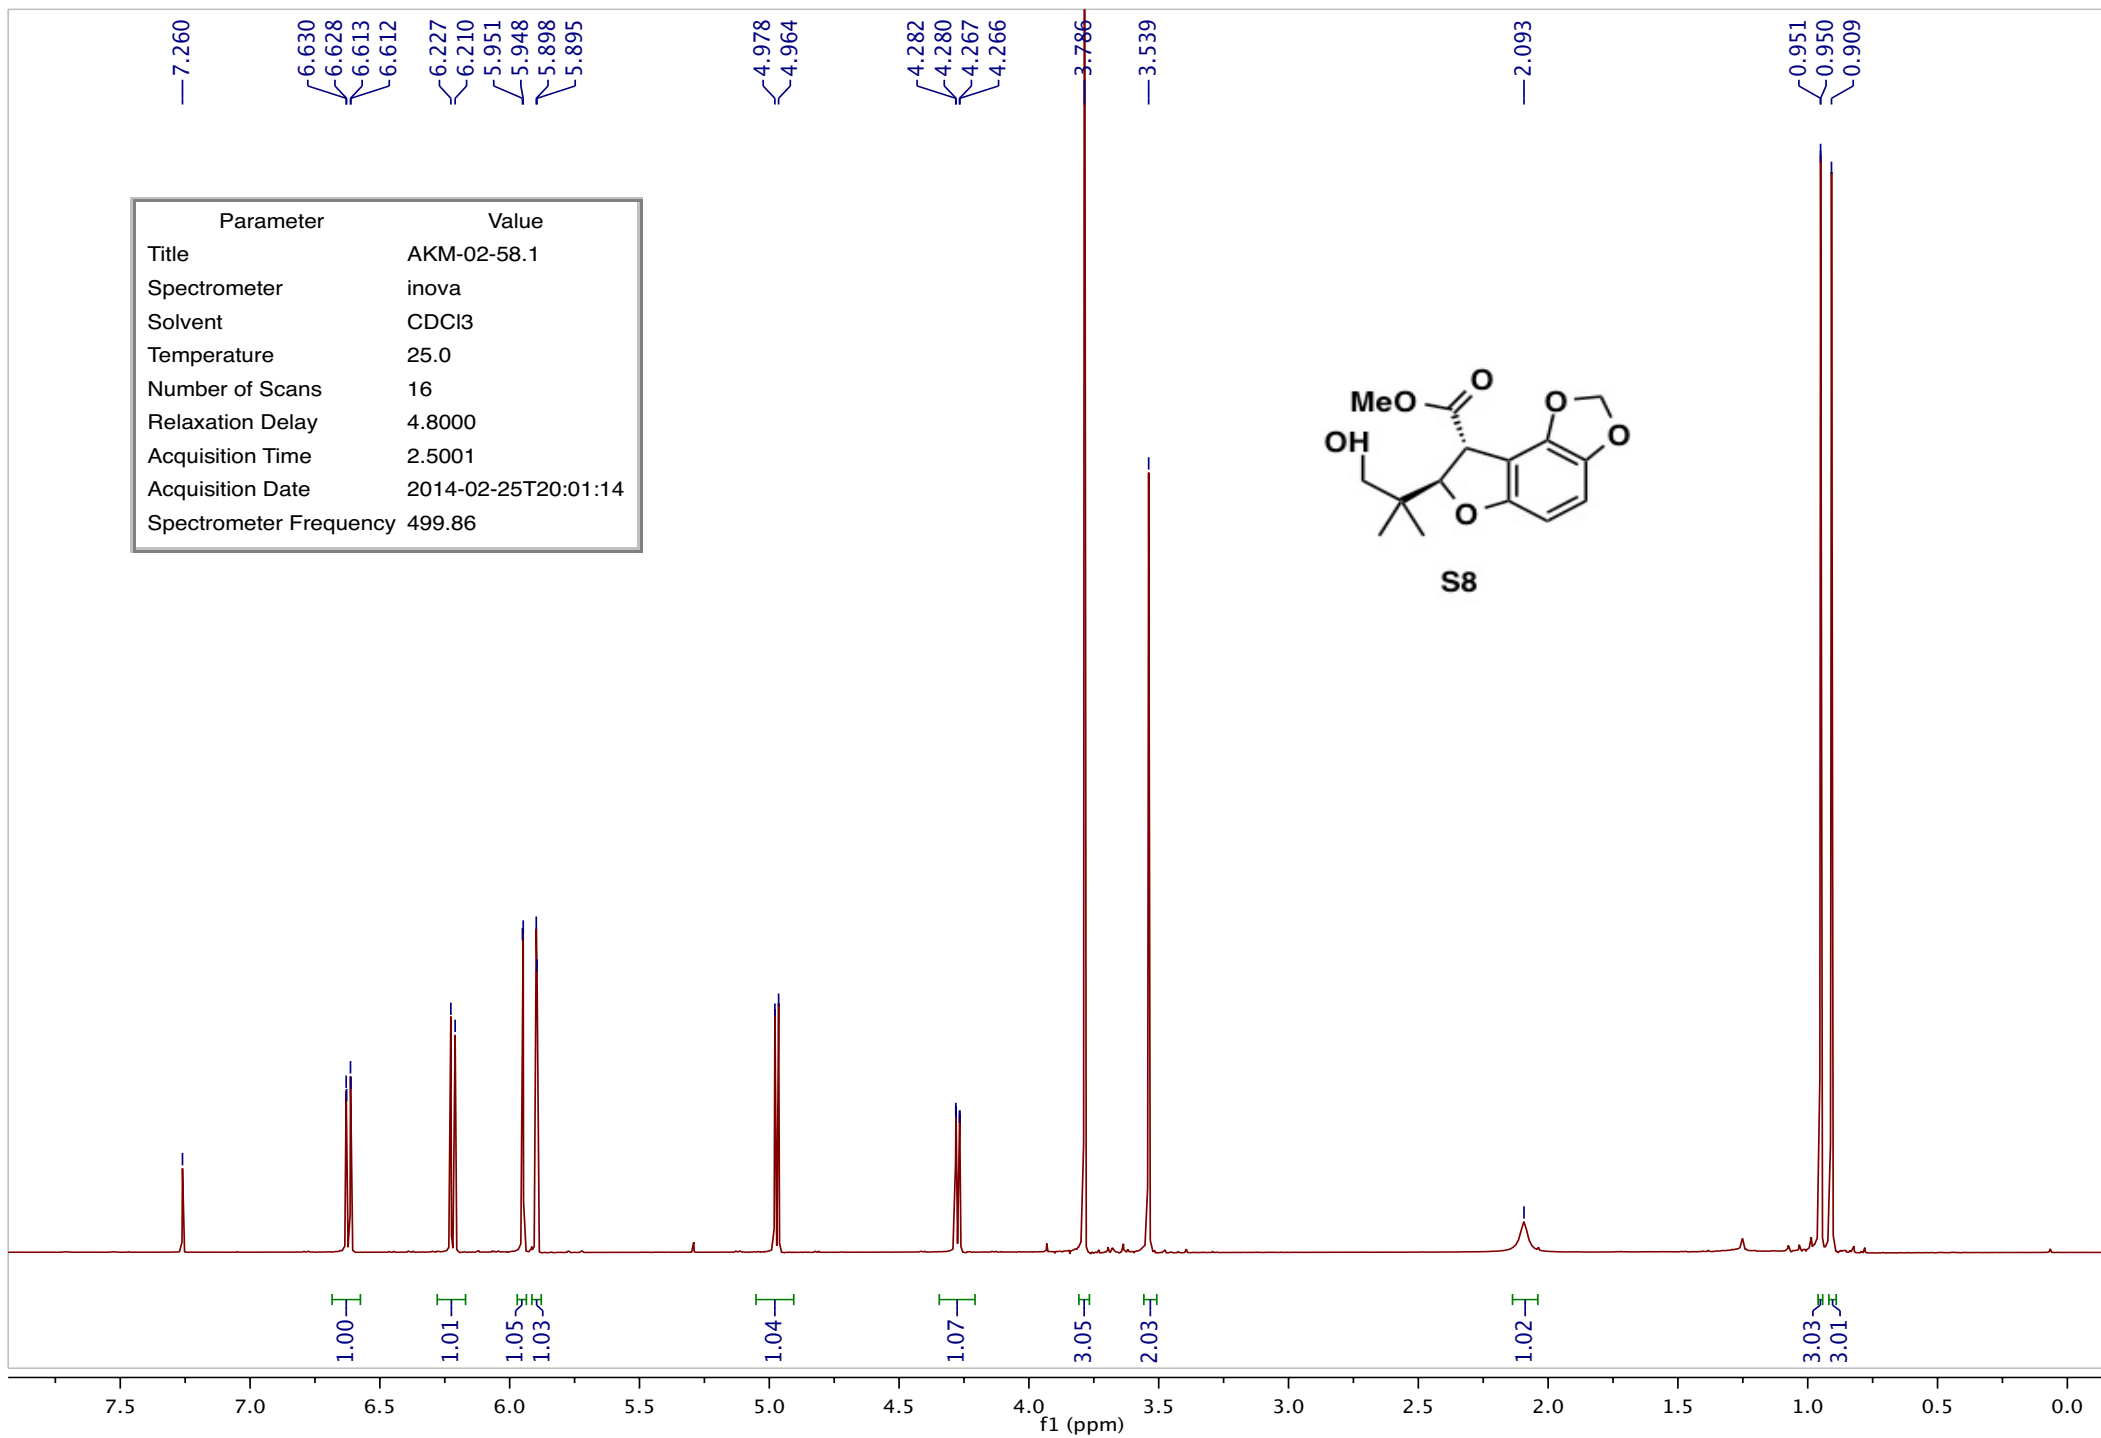

| Parameter              | Value               |
|------------------------|---------------------|
| Title                  | AKM-02-58.1         |
| Spectrometer           | inova               |
| Solvent                | CDCl <sub>3</sub>   |
| Temperature            | 25.0                |
| Number of Scans        | 16                  |
| Relaxation Delay       | 4.8000              |
| Acquisition Time       | 2.5001              |
| Acquisition Date       | 2014-02-25T20:01:14 |
| Spectrometer Frequency | 499.86              |

| Parameter              | Value               |
|------------------------|---------------------|
| Title                  | AKM-02-58.13C       |
| Spectrometer           | inova               |
| Solvent                | CDCl3               |
| Temperature            | 25.0                |
| Number of Scans        | 240                 |
| Relaxation Delay       | 1.0000              |
| Acquisition Time       | 1.3026              |
| Acquisition Date       | 2014-02-25T19:46:49 |
| Spectrometer Frequency | 125.70              |

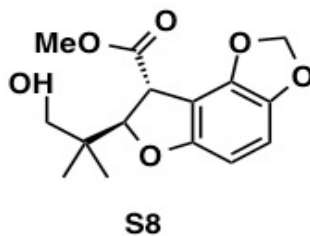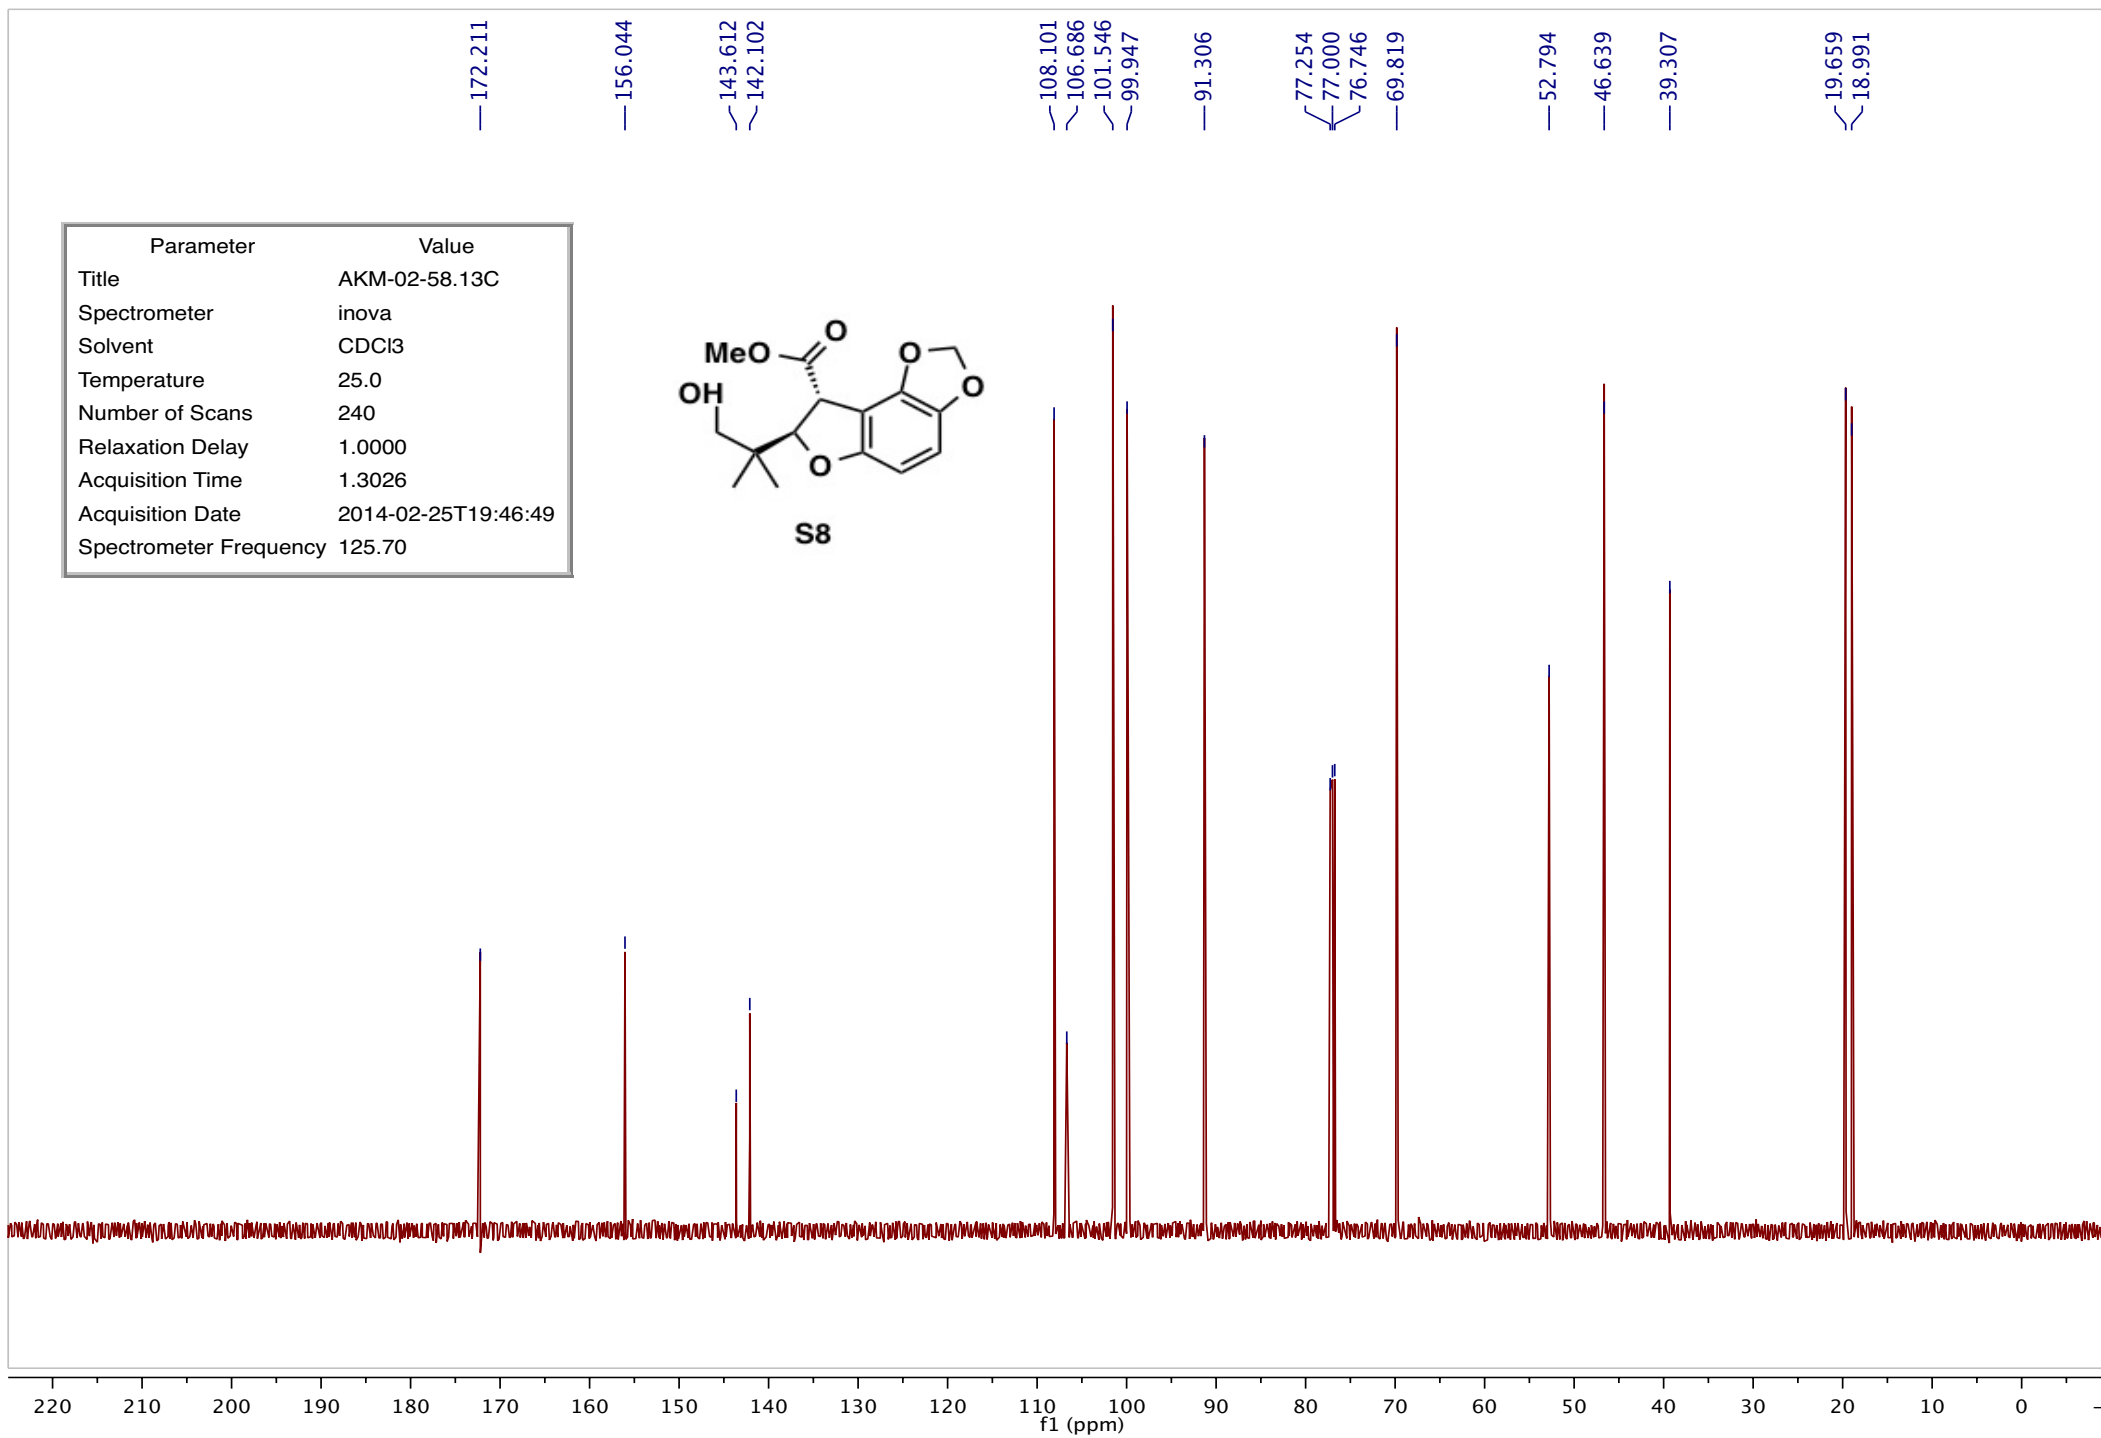

| Parameter              | Value               |
|------------------------|---------------------|
| Title                  | AKM-02-59           |
| Spectrometer           | inova               |
| Solvent                | CDCl3               |
| Temperature            | 25.0                |
| Number of Scans        | 16                  |
| Relaxation Delay       | 4.8000              |
| Acquisition Time       | 2.5001              |
| Acquisition Date       | 2014-02-26T11:36:21 |
| Spectrometer Frequency | 499.86              |

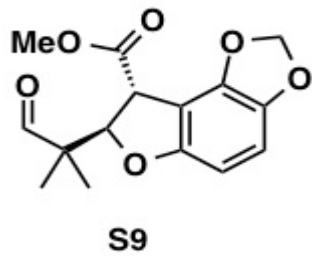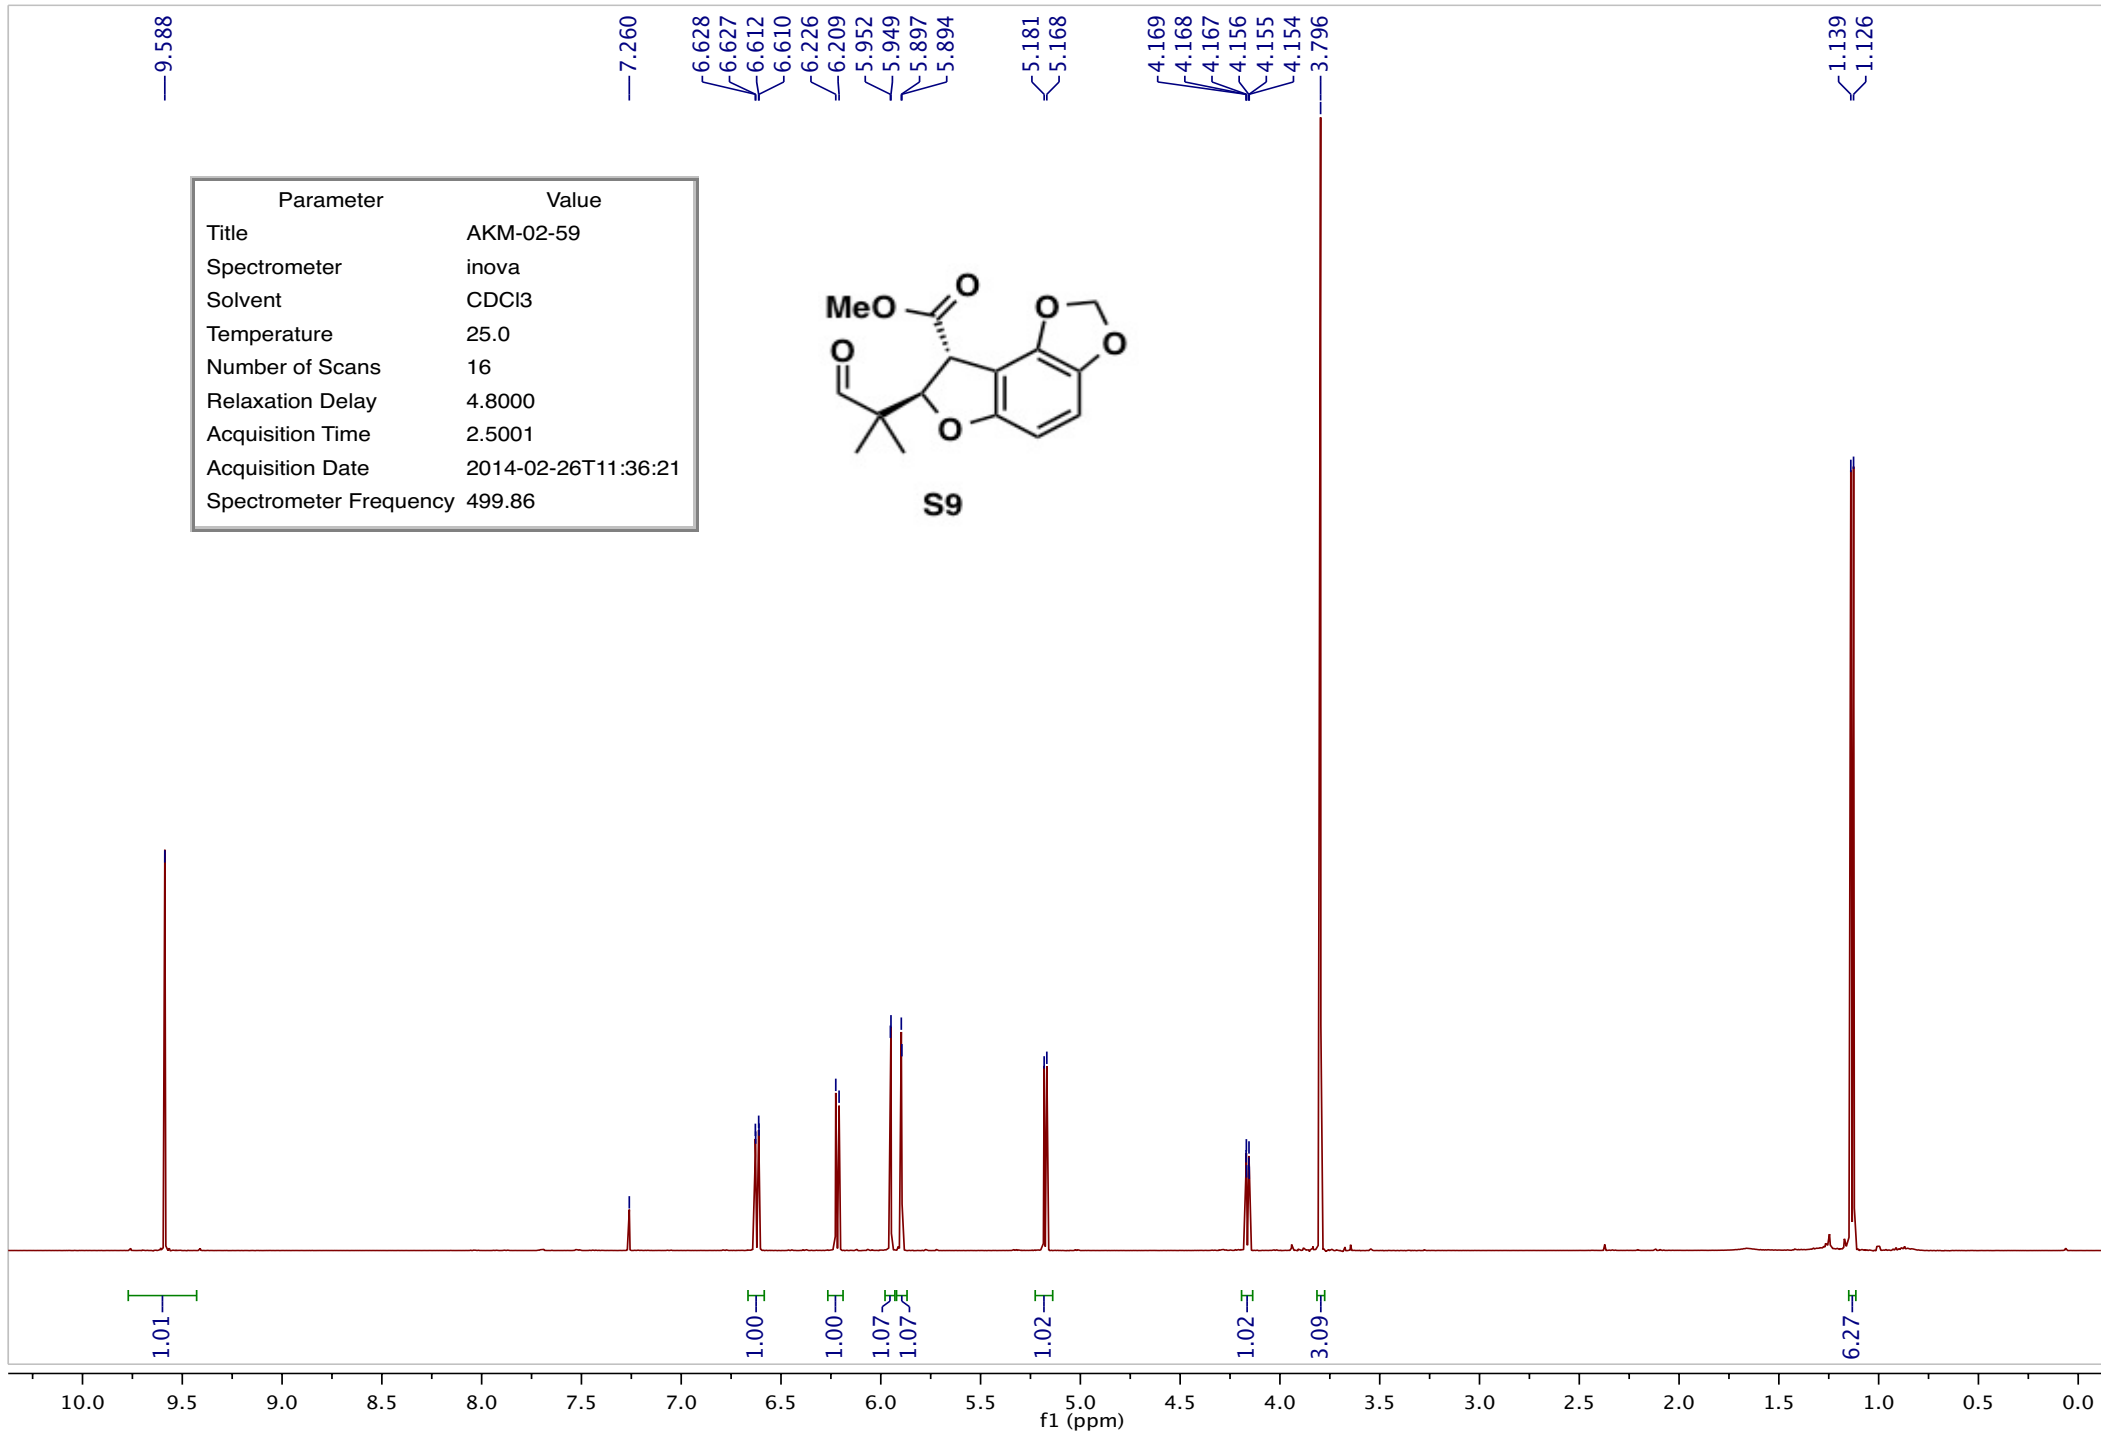

| Parameter              | Value               |
|------------------------|---------------------|
| Title                  | AKM-02-59.13C       |
| Spectrometer           | inova               |
| Solvent                | CDCl3               |
| Temperature            | 25.0                |
| Number of Scans        | 284                 |
| Relaxation Delay       | 1.0000              |
| Acquisition Time       | 1.3026              |
| Acquisition Date       | 2014-02-26T12:15:39 |
| Spectrometer Frequency | 125.70              |

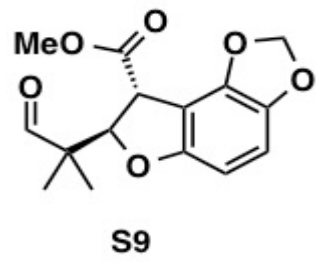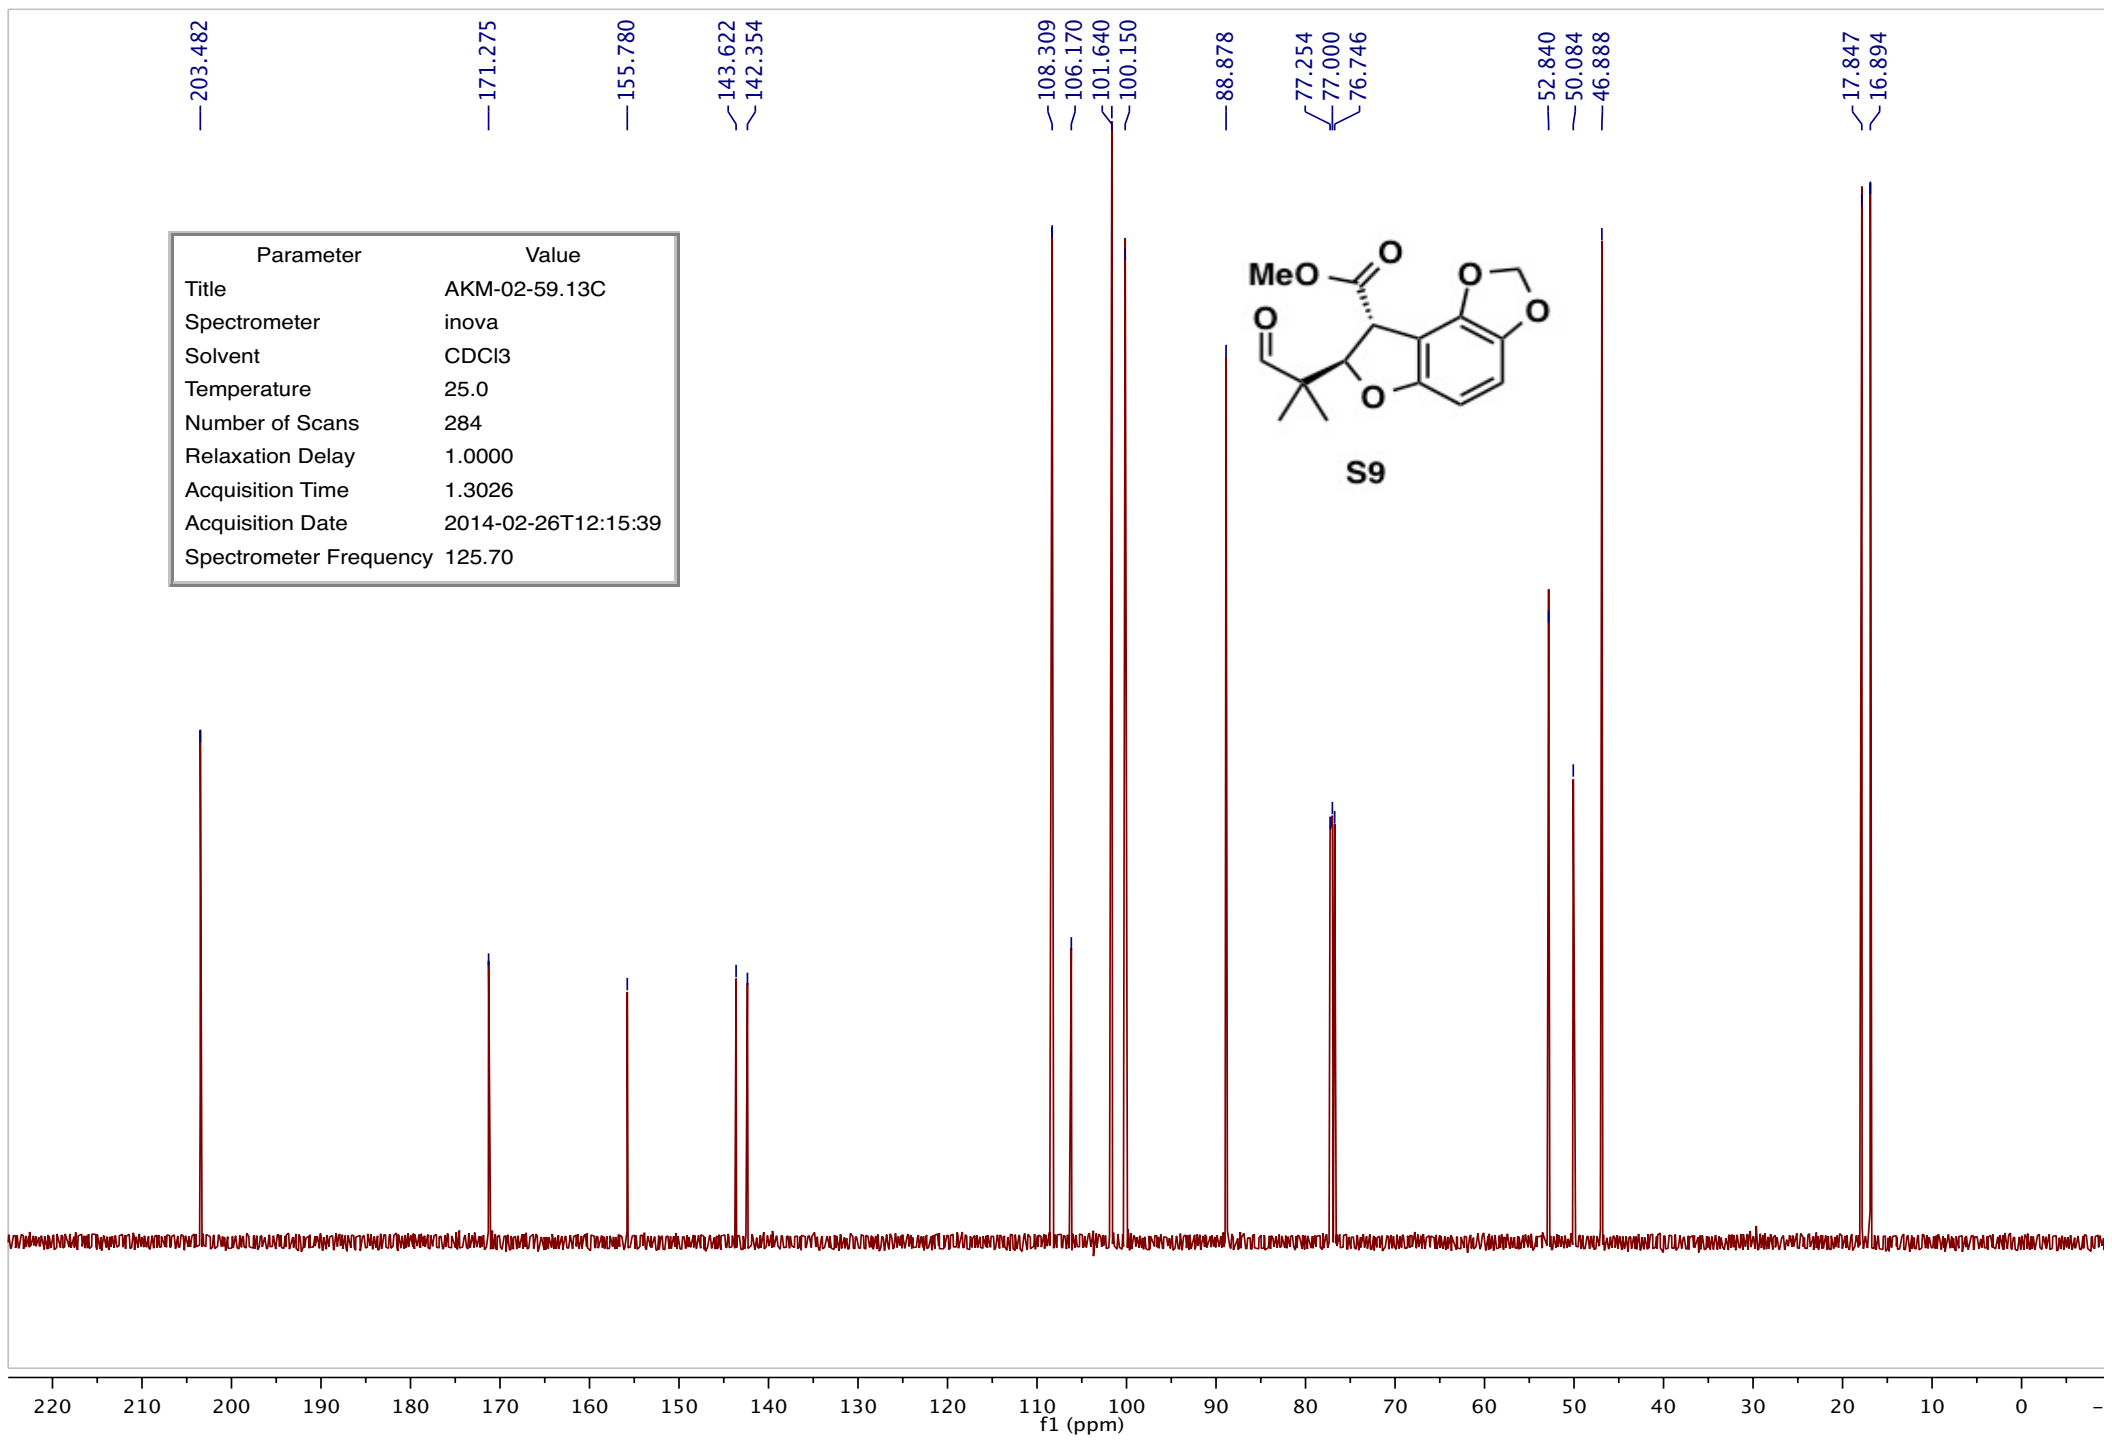

7.260  
6.629  
6.627  
6.615  
6.614  
6.230  
6.216  
5.949  
5.946  
5.896  
5.894  
5.890  
5.876  
5.863  
5.182  
5.179  
5.177  
5.175  
5.168  
5.166  
5.164  
5.163  
5.161  
5.151  
5.149  
5.147  
5.071  
5.059  
4.356  
4.344  
3.782  
3.622  
3.618  
3.604  
3.601  
2.412  
2.405  
2.402  
2.392  
2.389  
2.385  
2.382  
2.379  
2.160  
2.146  
2.144  
2.142  
2.137  
2.128  
2.123  
2.121  
2.119  
1.029  
0.864

| Parameter              | Value               |
|------------------------|---------------------|
| Title                  | AKM-02-131pure      |
| Spectrometer           | inova               |
| Solvent                | cdcl3               |
| Temperature            | 25.0                |
| Number of Scans        | 12                  |
| Relaxation Delay       | 4.8000              |
| Acquisition Time       | 2.5000              |
| Acquisition Date       | 2014-04-23T11:44:22 |
| Spectrometer Frequency | 599.64              |

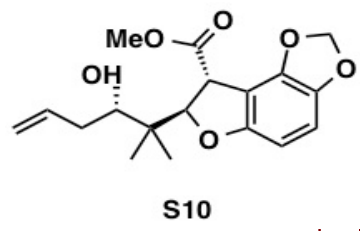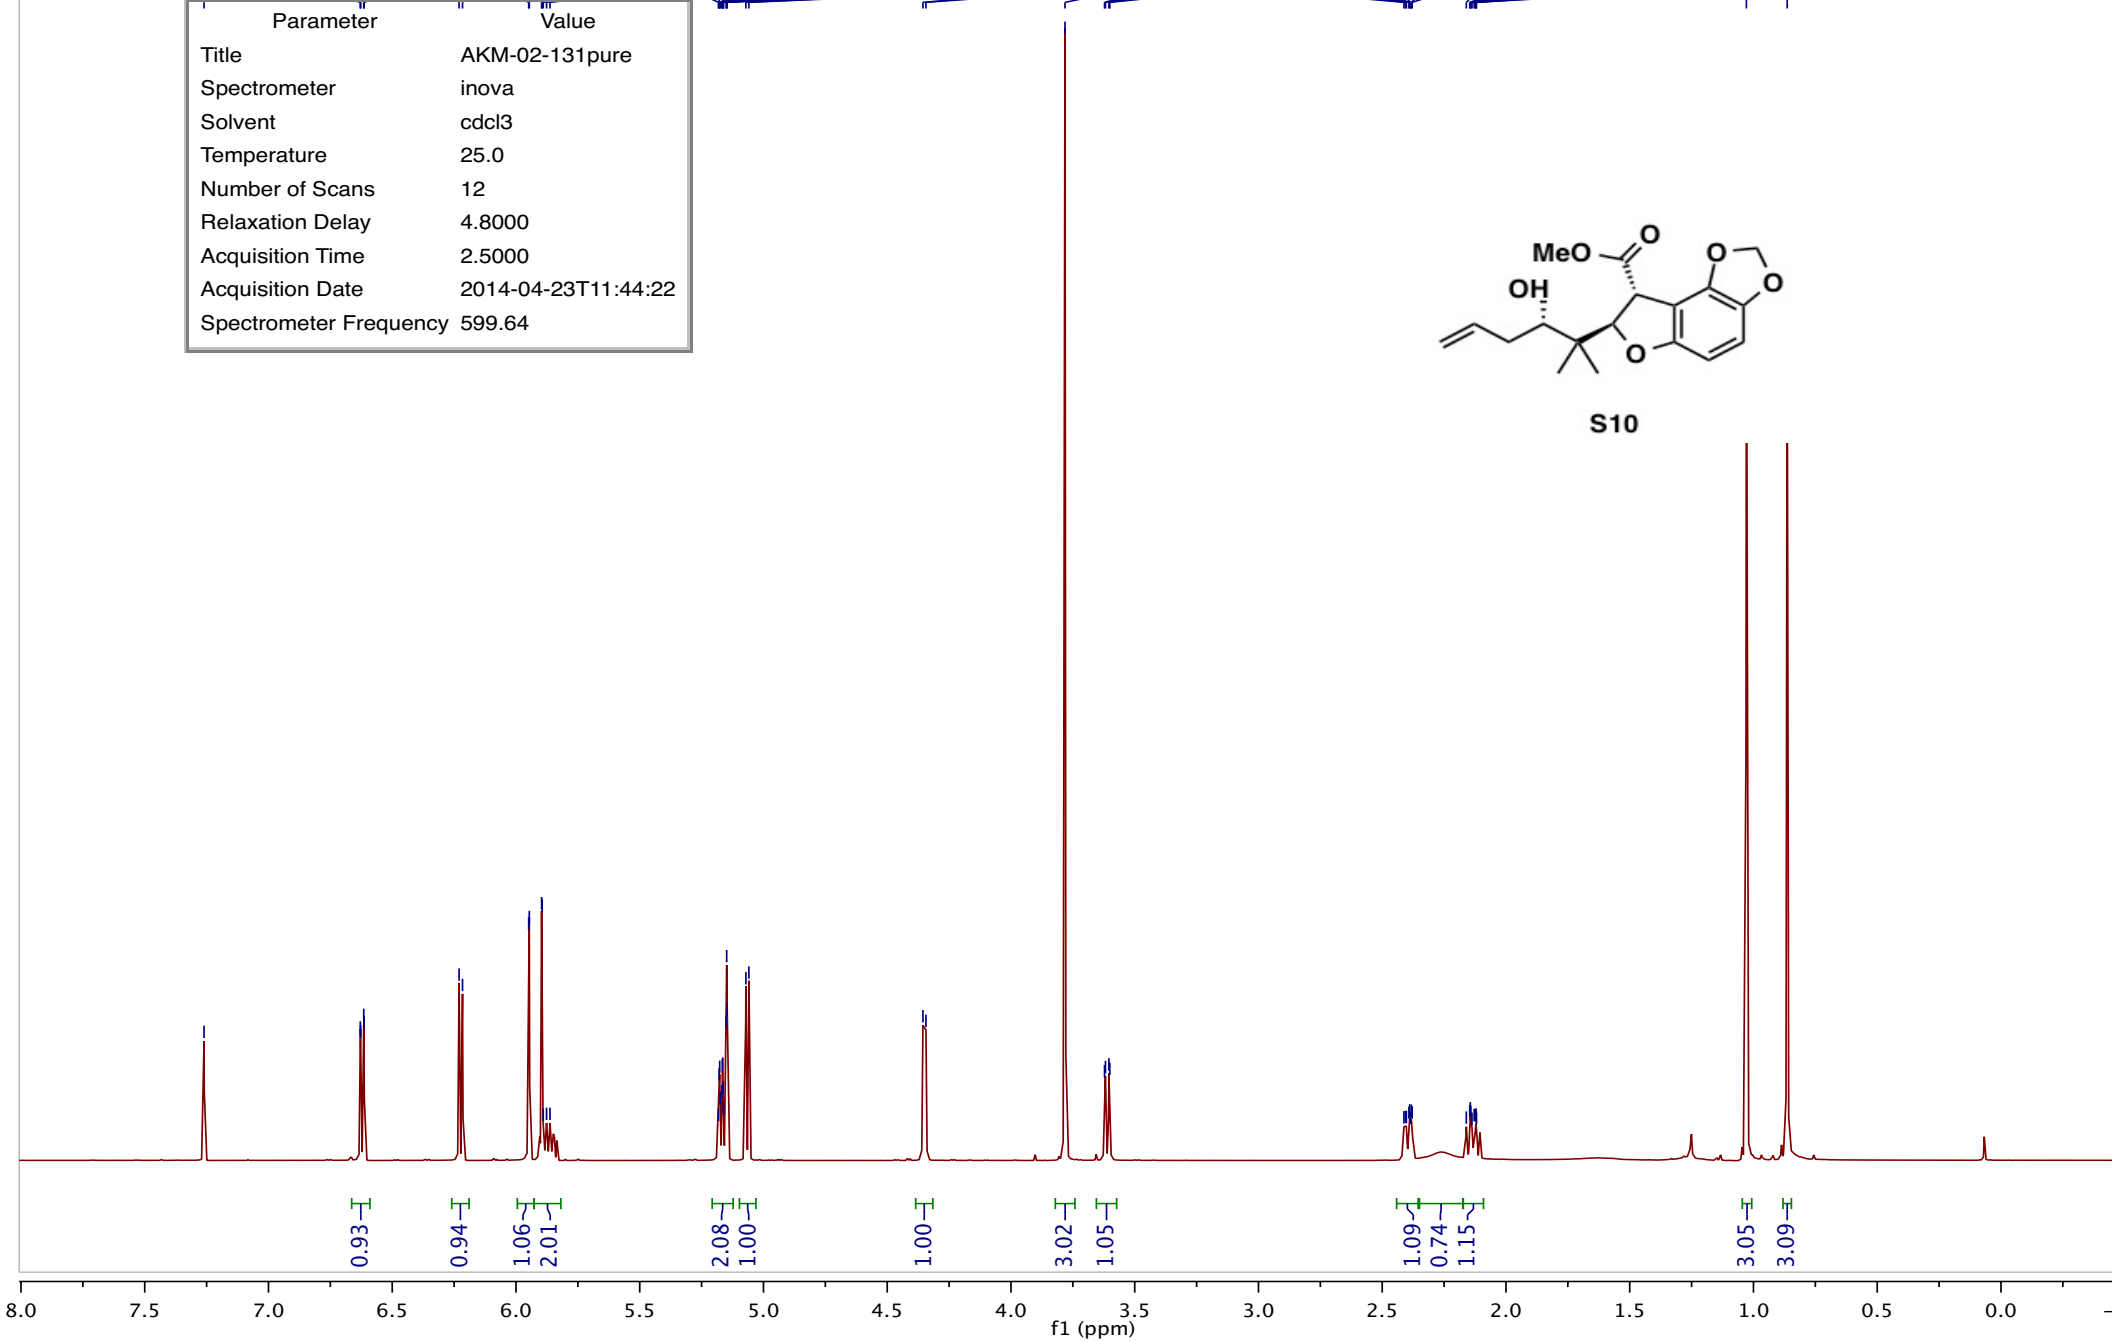

8.0 7.5 7.0 6.5 6.0 5.5 5.0 4.5 4.0 3.5 3.0 2.5 2.0 1.5 1.0 0.5 0.0 -

f1 (ppm)

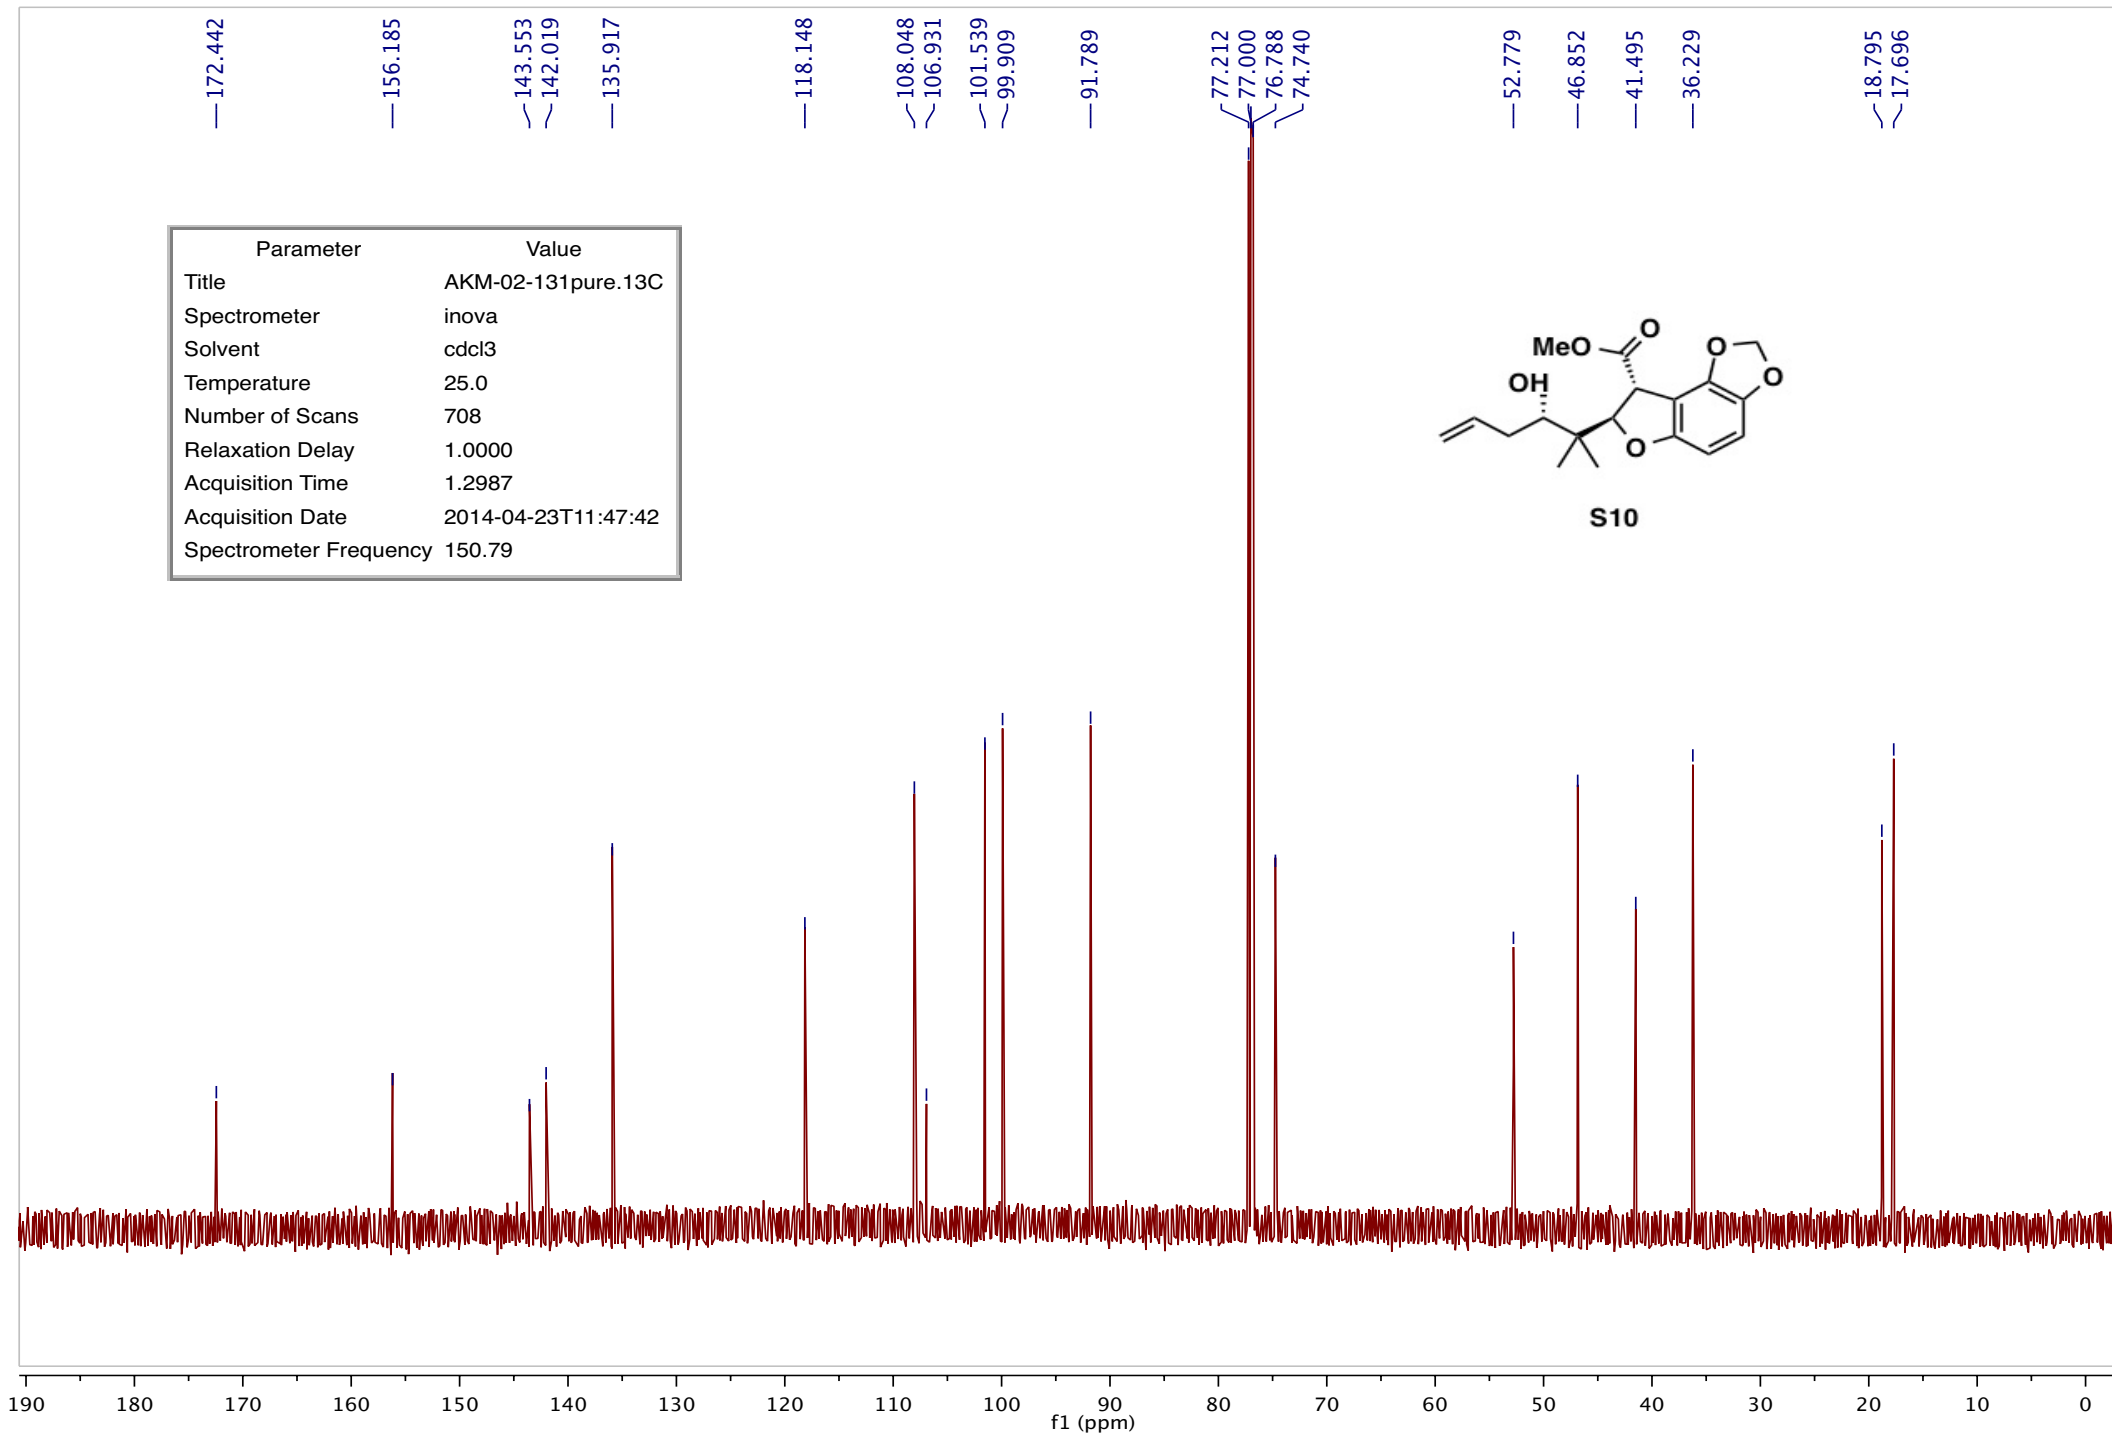

| Parameter              | Value               |
|------------------------|---------------------|
| Title                  | AKM-02-131pure.13C  |
| Spectrometer           | inova               |
| Solvent                | cdcl3               |
| Temperature            | 25.0                |
| Number of Scans        | 708                 |
| Relaxation Delay       | 1.0000              |
| Acquisition Time       | 1.2987              |
| Acquisition Date       | 2014-04-23T11:47:42 |
| Spectrometer Frequency | 150.79              |

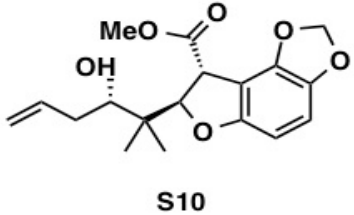



| Parameter              | Value               |
|------------------------|---------------------|
| Title                  | AKM-02-144          |
| Spectrometer           | inova               |
| Solvent                | cdcl3               |
| Temperature            | 25.0                |
| Number of Scans        | 12                  |
| Relaxation Delay       | 4.8000              |
| Acquisition Time       | 2.5000              |
| Acquisition Date       | 2014-04-23T18:05:49 |
| Spectrometer Frequency | 599.64              |

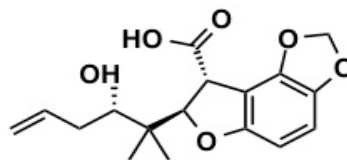

S11

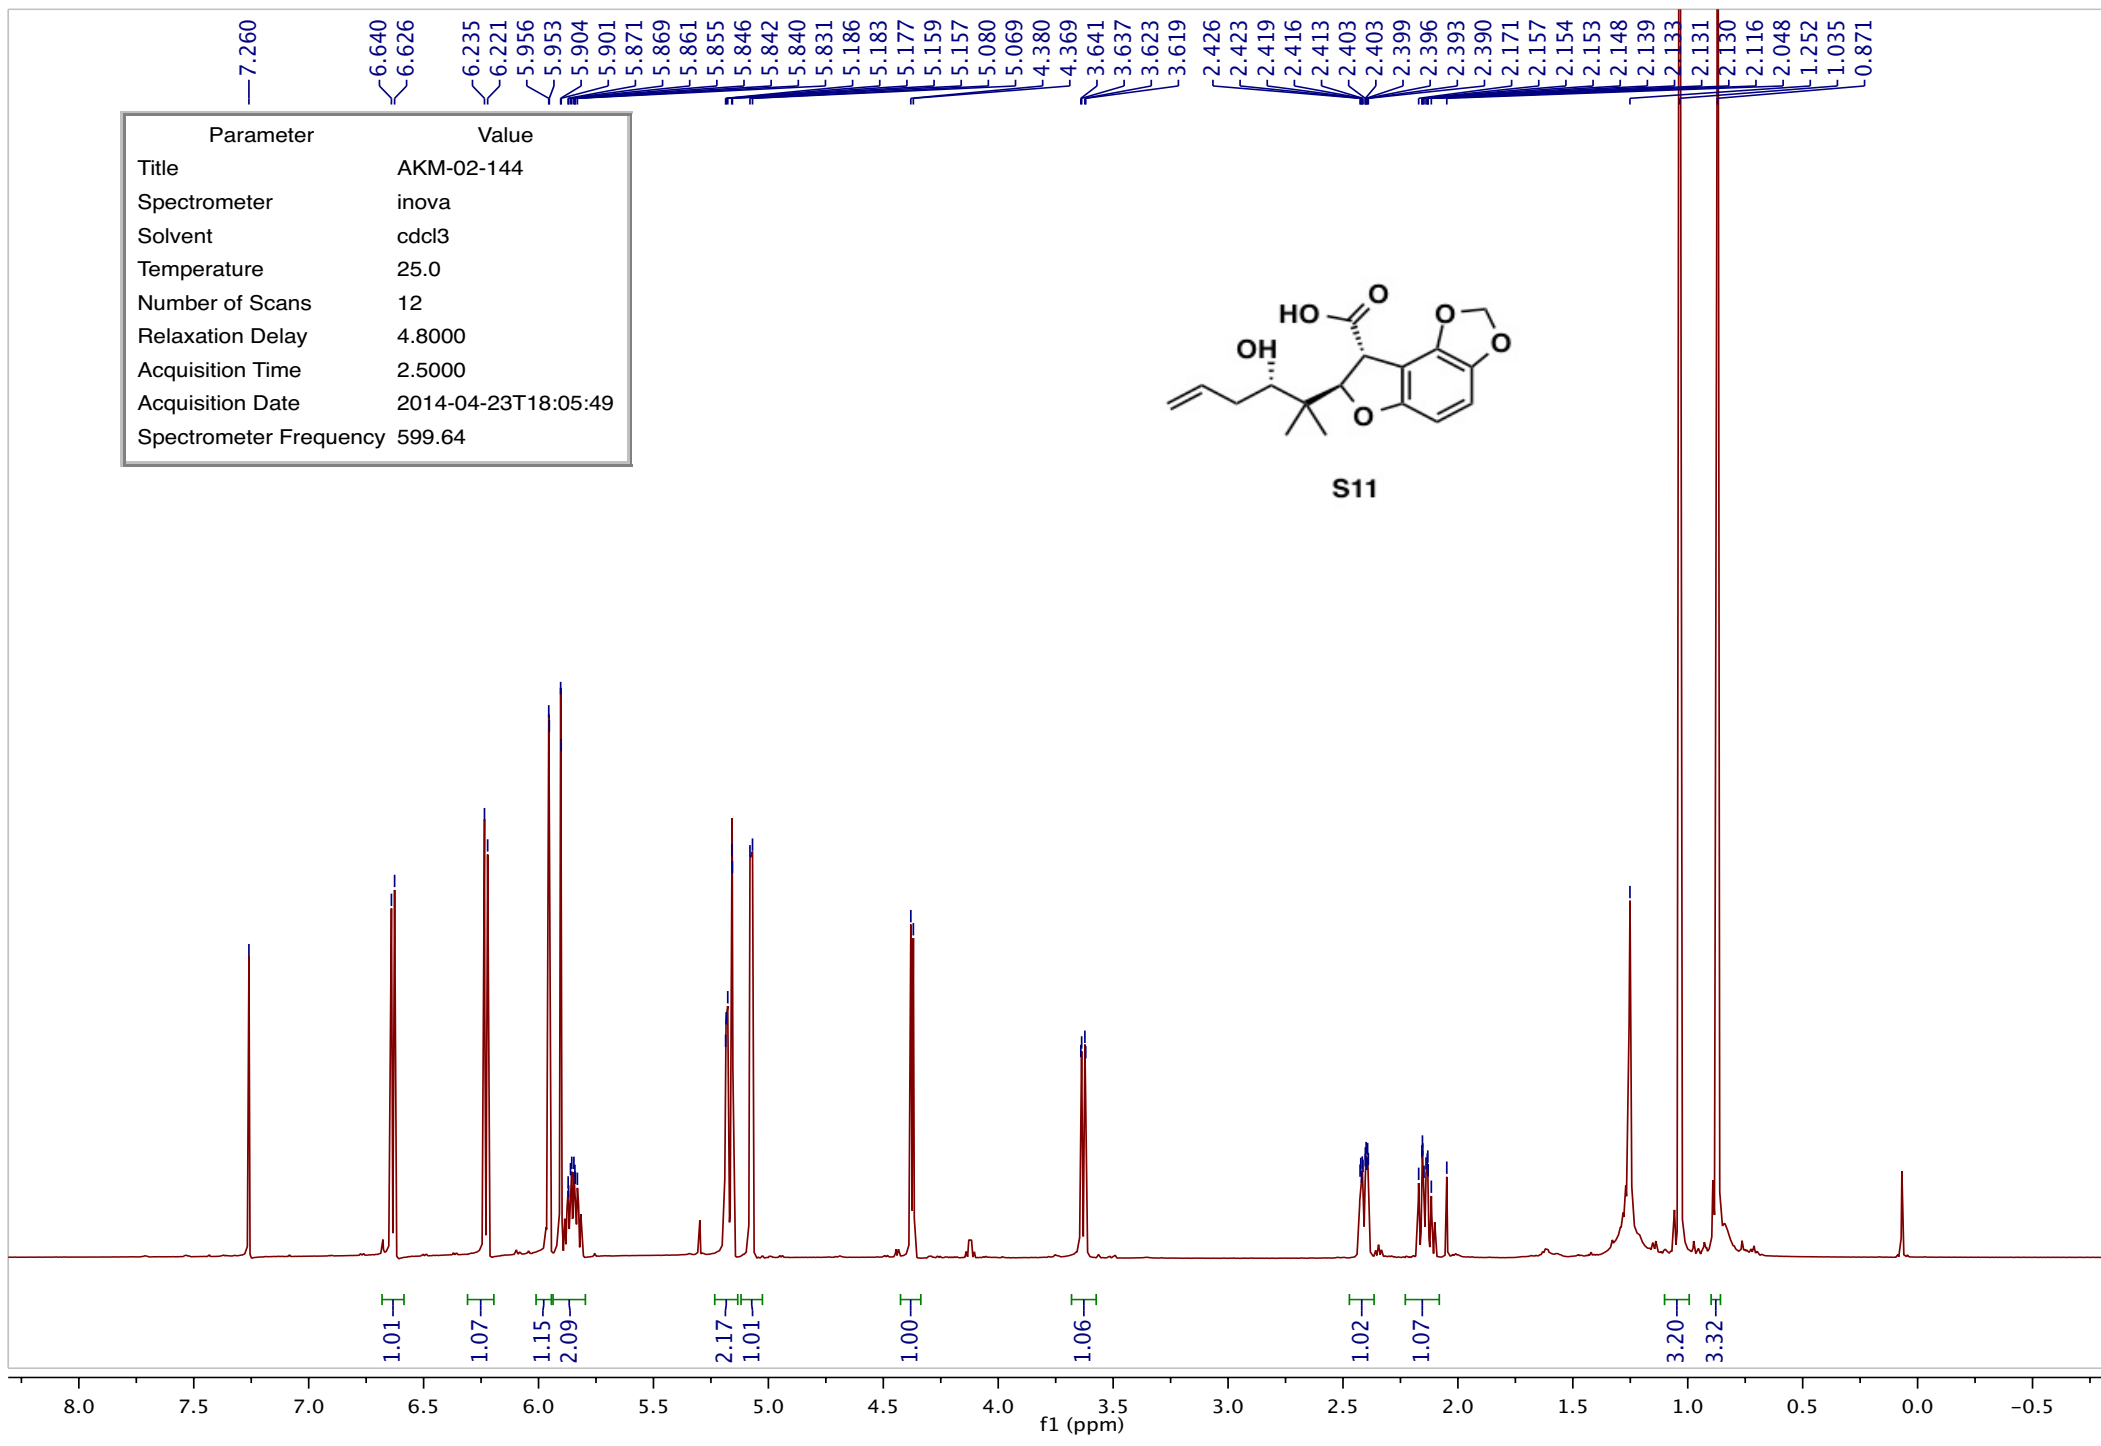

| Parameter              | Value               |
|------------------------|---------------------|
| Title                  | AKM-02-144.13C      |
| Spectrometer           | inova               |
| Solvent                | cdcl3               |
| Temperature            | 25.0                |
| Number of Scans        | 812                 |
| Relaxation Delay       | 1.0000              |
| Acquisition Time       | 1.2987              |
| Acquisition Date       | 2014-04-23T18:09:18 |
| Spectrometer Frequency | 150.79              |

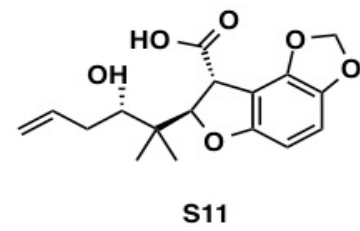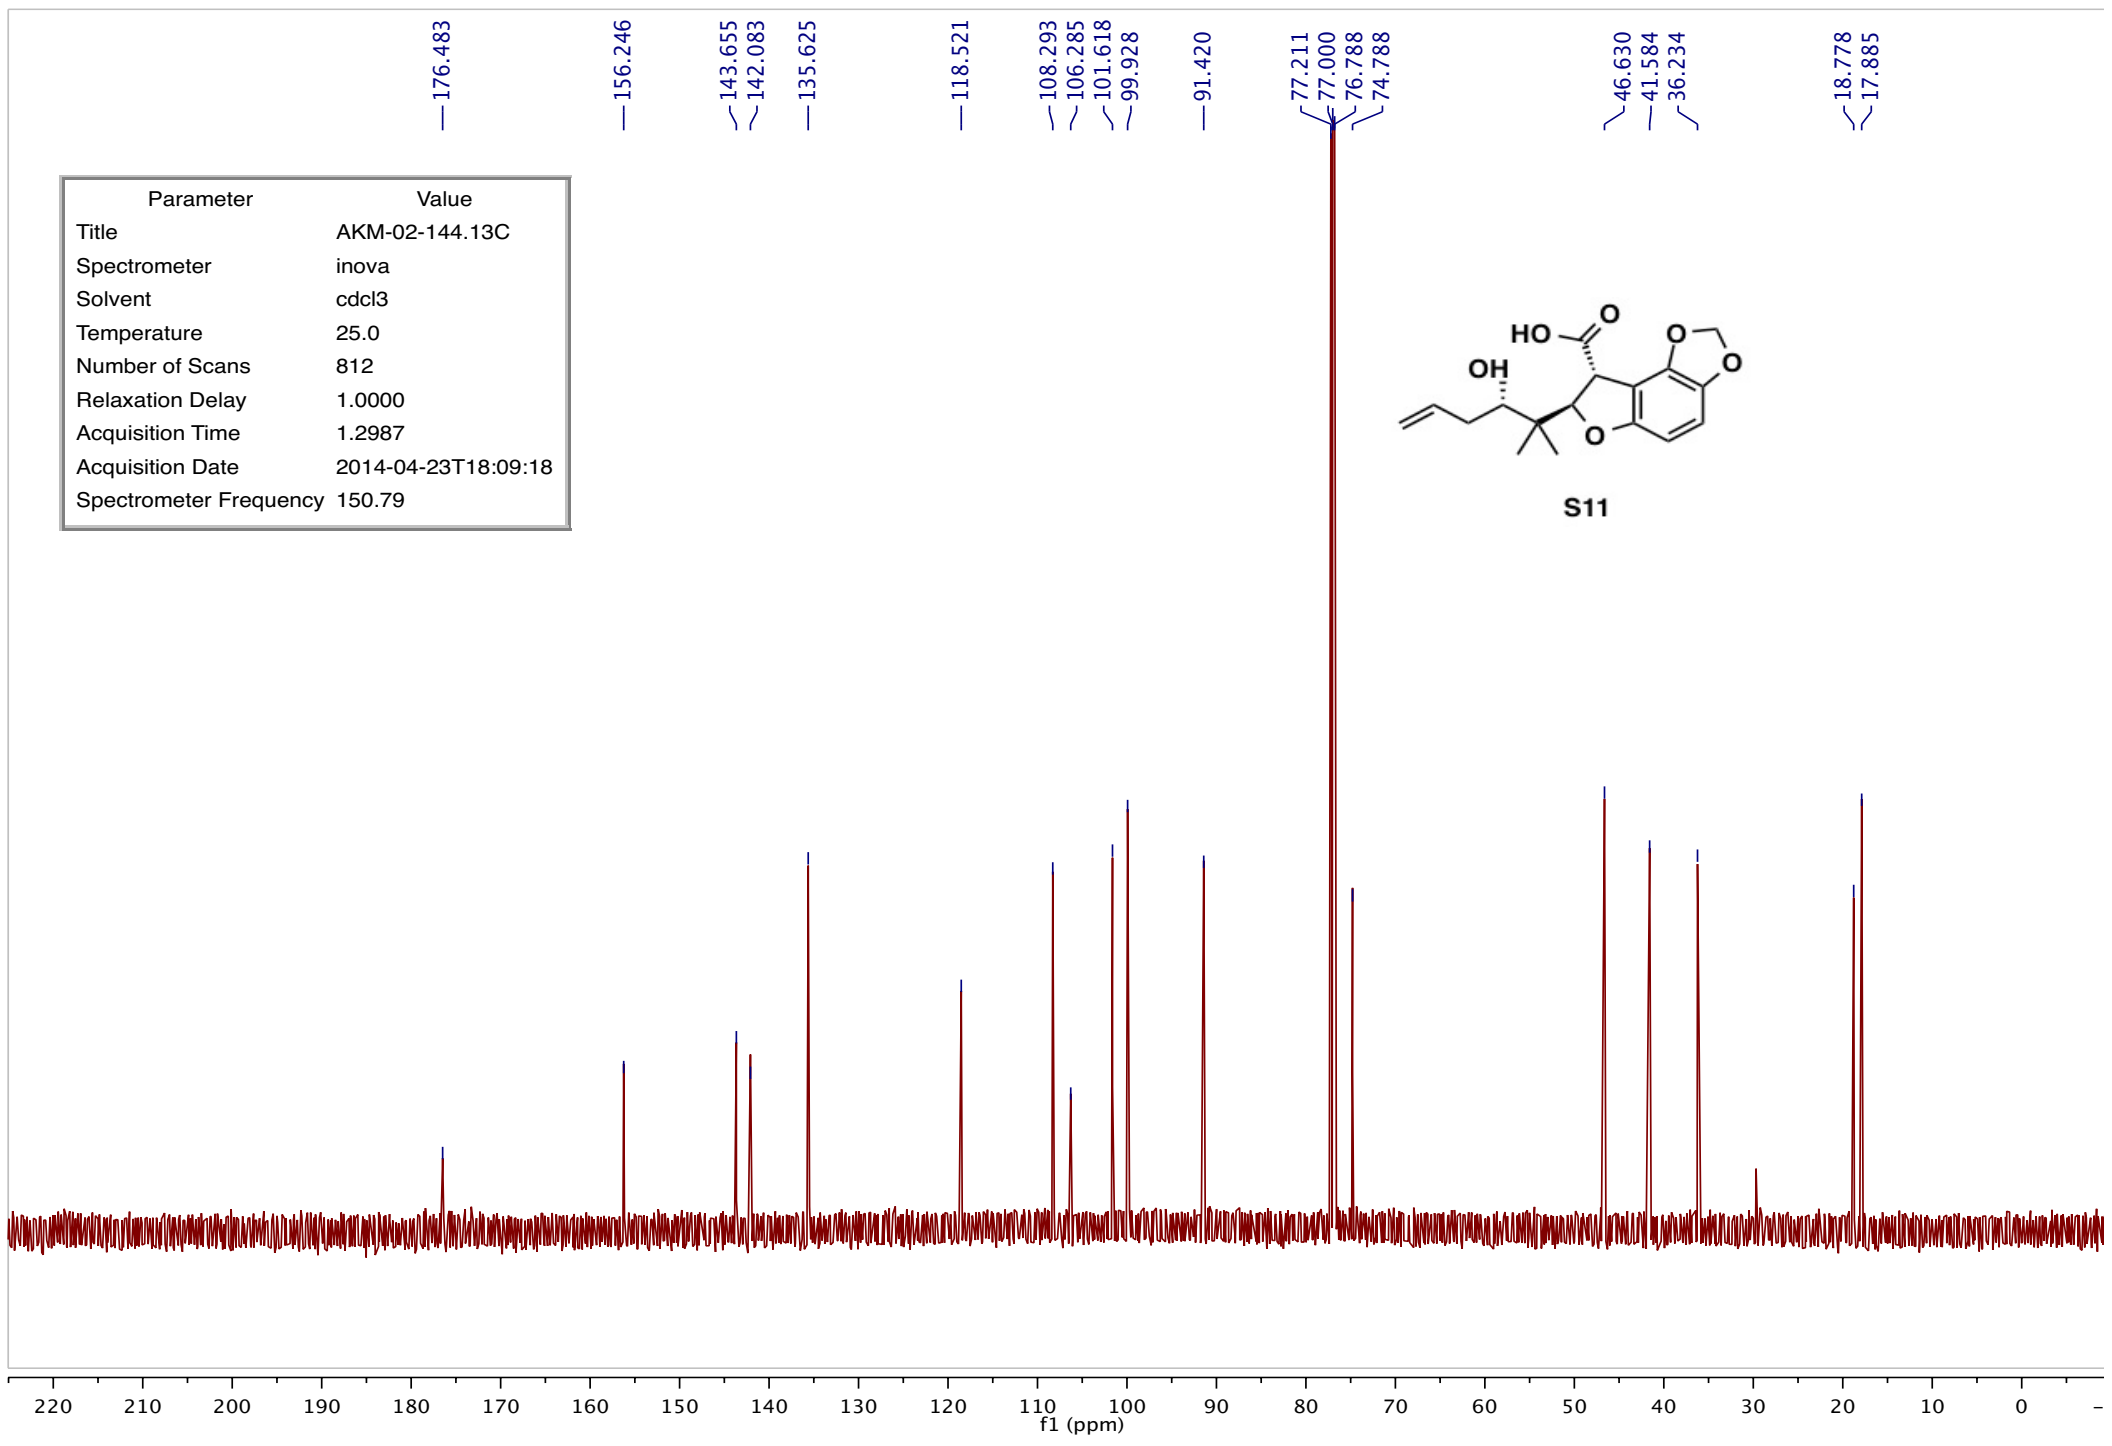

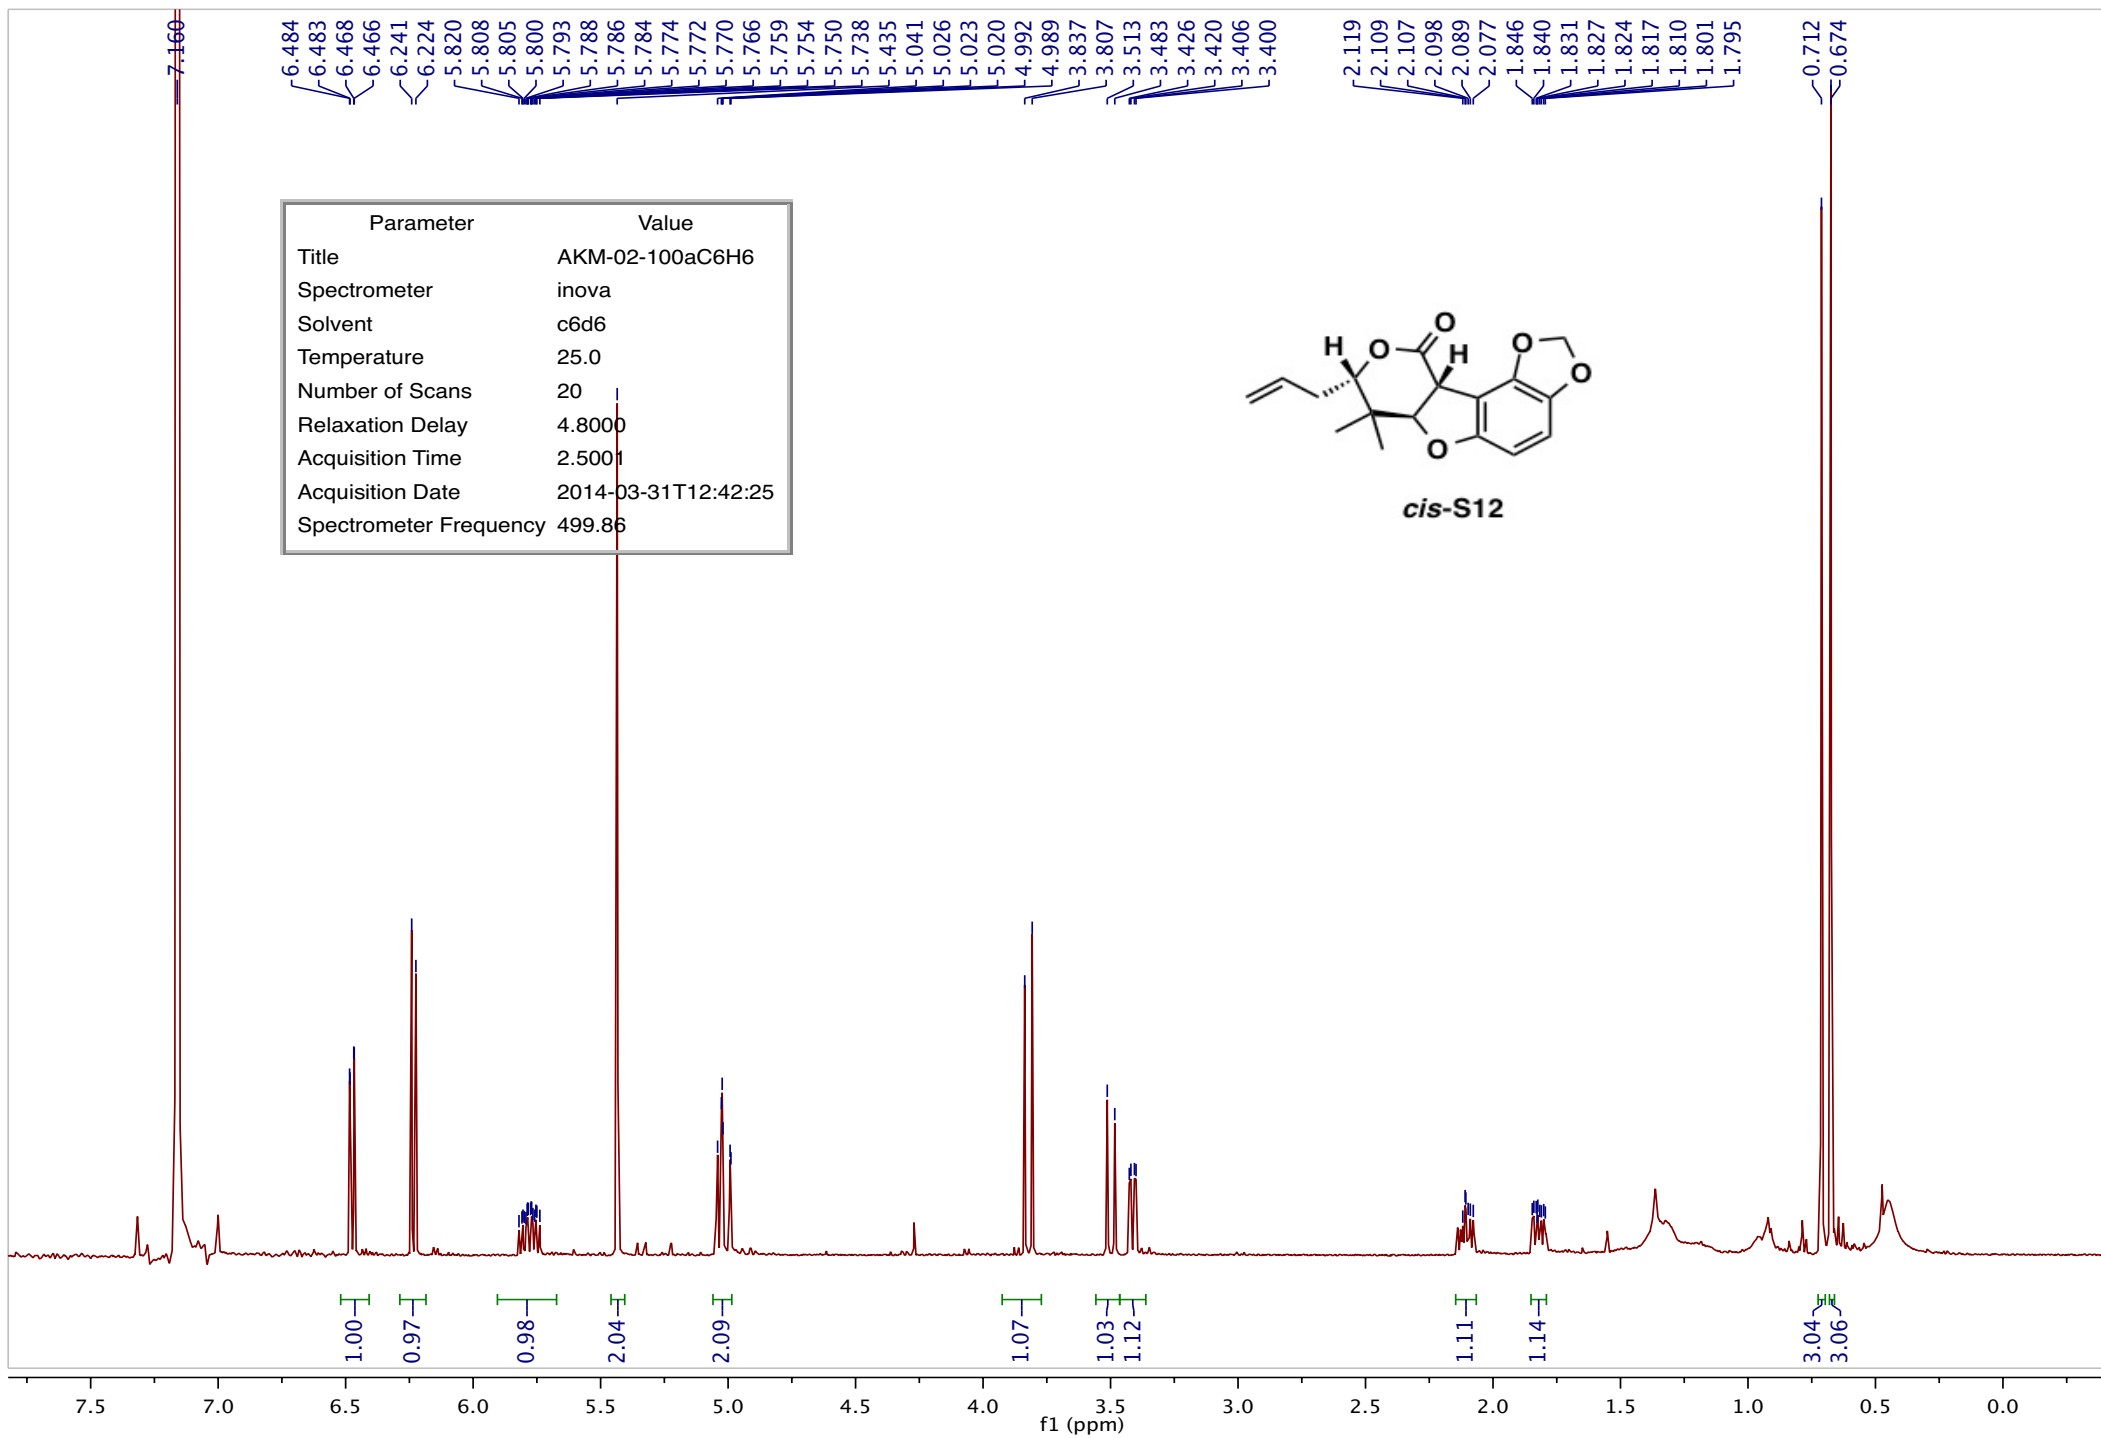

| Parameter              | Value               |
|------------------------|---------------------|
| Title                  | AKM-02-100aC6H6     |
| Spectrometer           | inova               |
| Solvent                | c6d6                |
| Temperature            | 25.0                |
| Number of Scans        | 20                  |
| Relaxation Delay       | 4.8000              |
| Acquisition Time       | 2.5001              |
| Acquisition Date       | 2014-03-31T12:42:25 |
| Spectrometer Frequency | 499.86              |

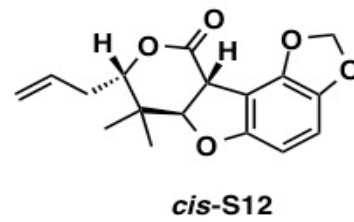

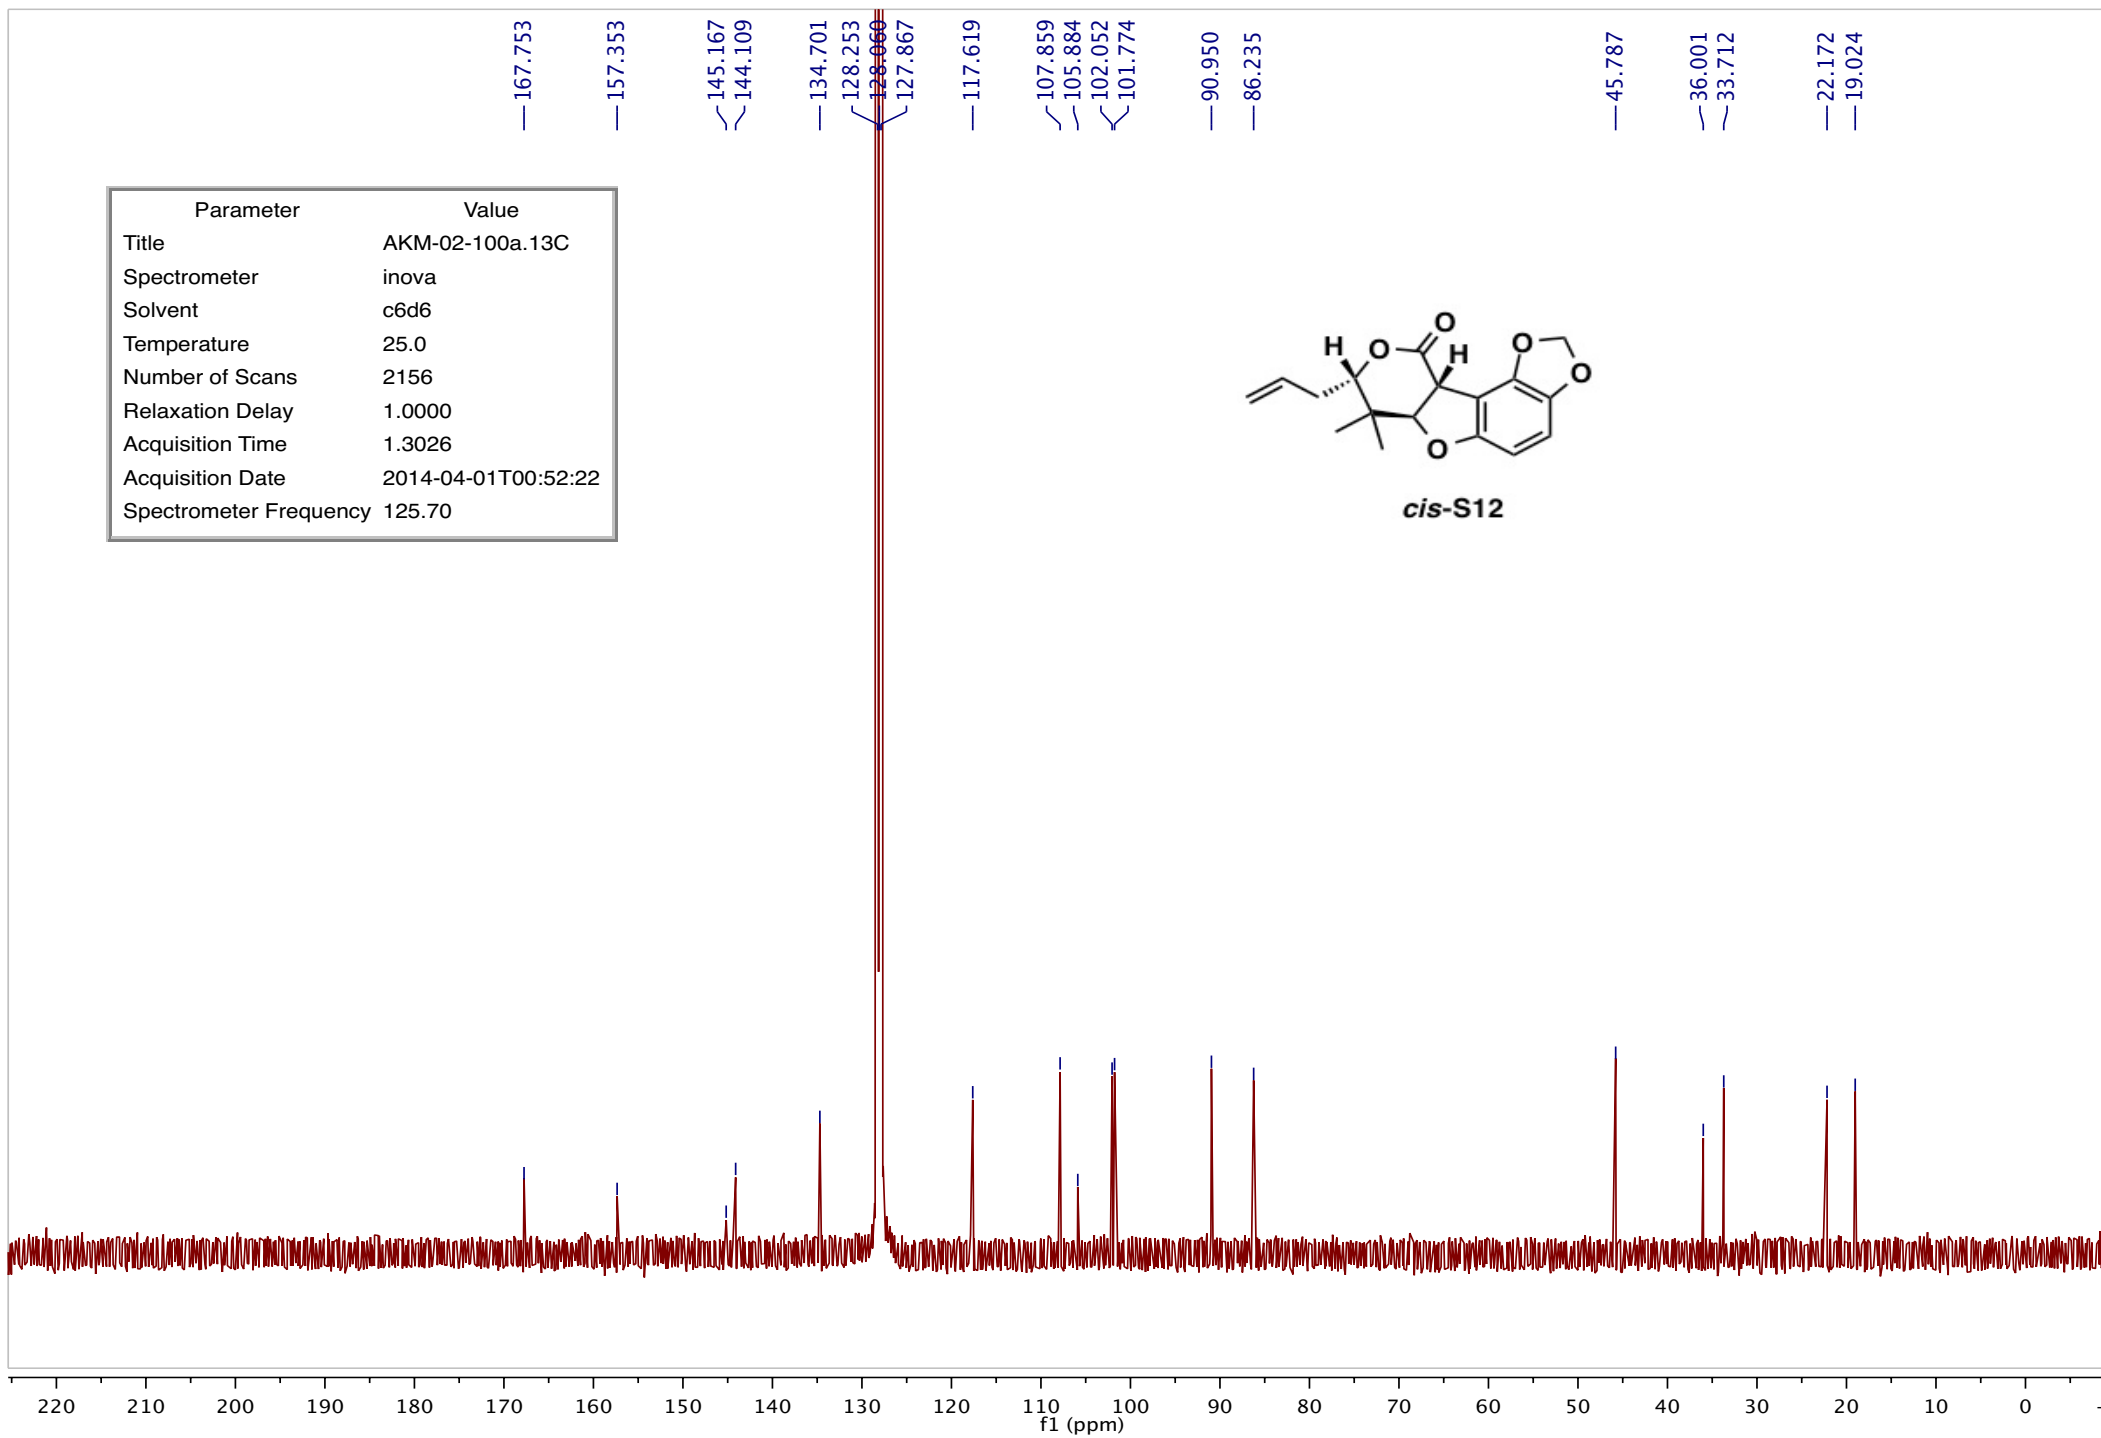

| Parameter              | Value               |
|------------------------|---------------------|
| Title                  | AKM-02-100a.13C     |
| Spectrometer           | inova               |
| Solvent                | c6d6                |
| Temperature            | 25.0                |
| Number of Scans        | 2156                |
| Relaxation Delay       | 1.0000              |
| Acquisition Time       | 1.3026              |
| Acquisition Date       | 2014-04-01T00:52:22 |
| Spectrometer Frequency | 125.70              |

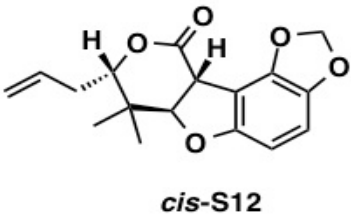

| Parameter              | Value (f2, f1)      |
|------------------------|---------------------|
| Title                  | akm-02-100acosy     |
| Spectrometer           | inova               |
| Solvent                | c6d6                |
| Temperature            | 30.0                |
| Number of Scans        | 8                   |
| Relaxation Delay       | 1.0000              |
| Acquisition Date       | 2014-04-02T21:53:59 |
| Spectrometer Frequency | (599.63, 599.63)    |
| Nucleus                | (1H, 1H)            |

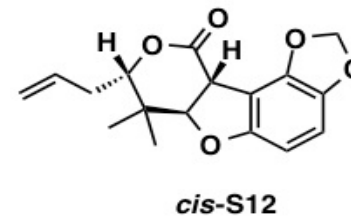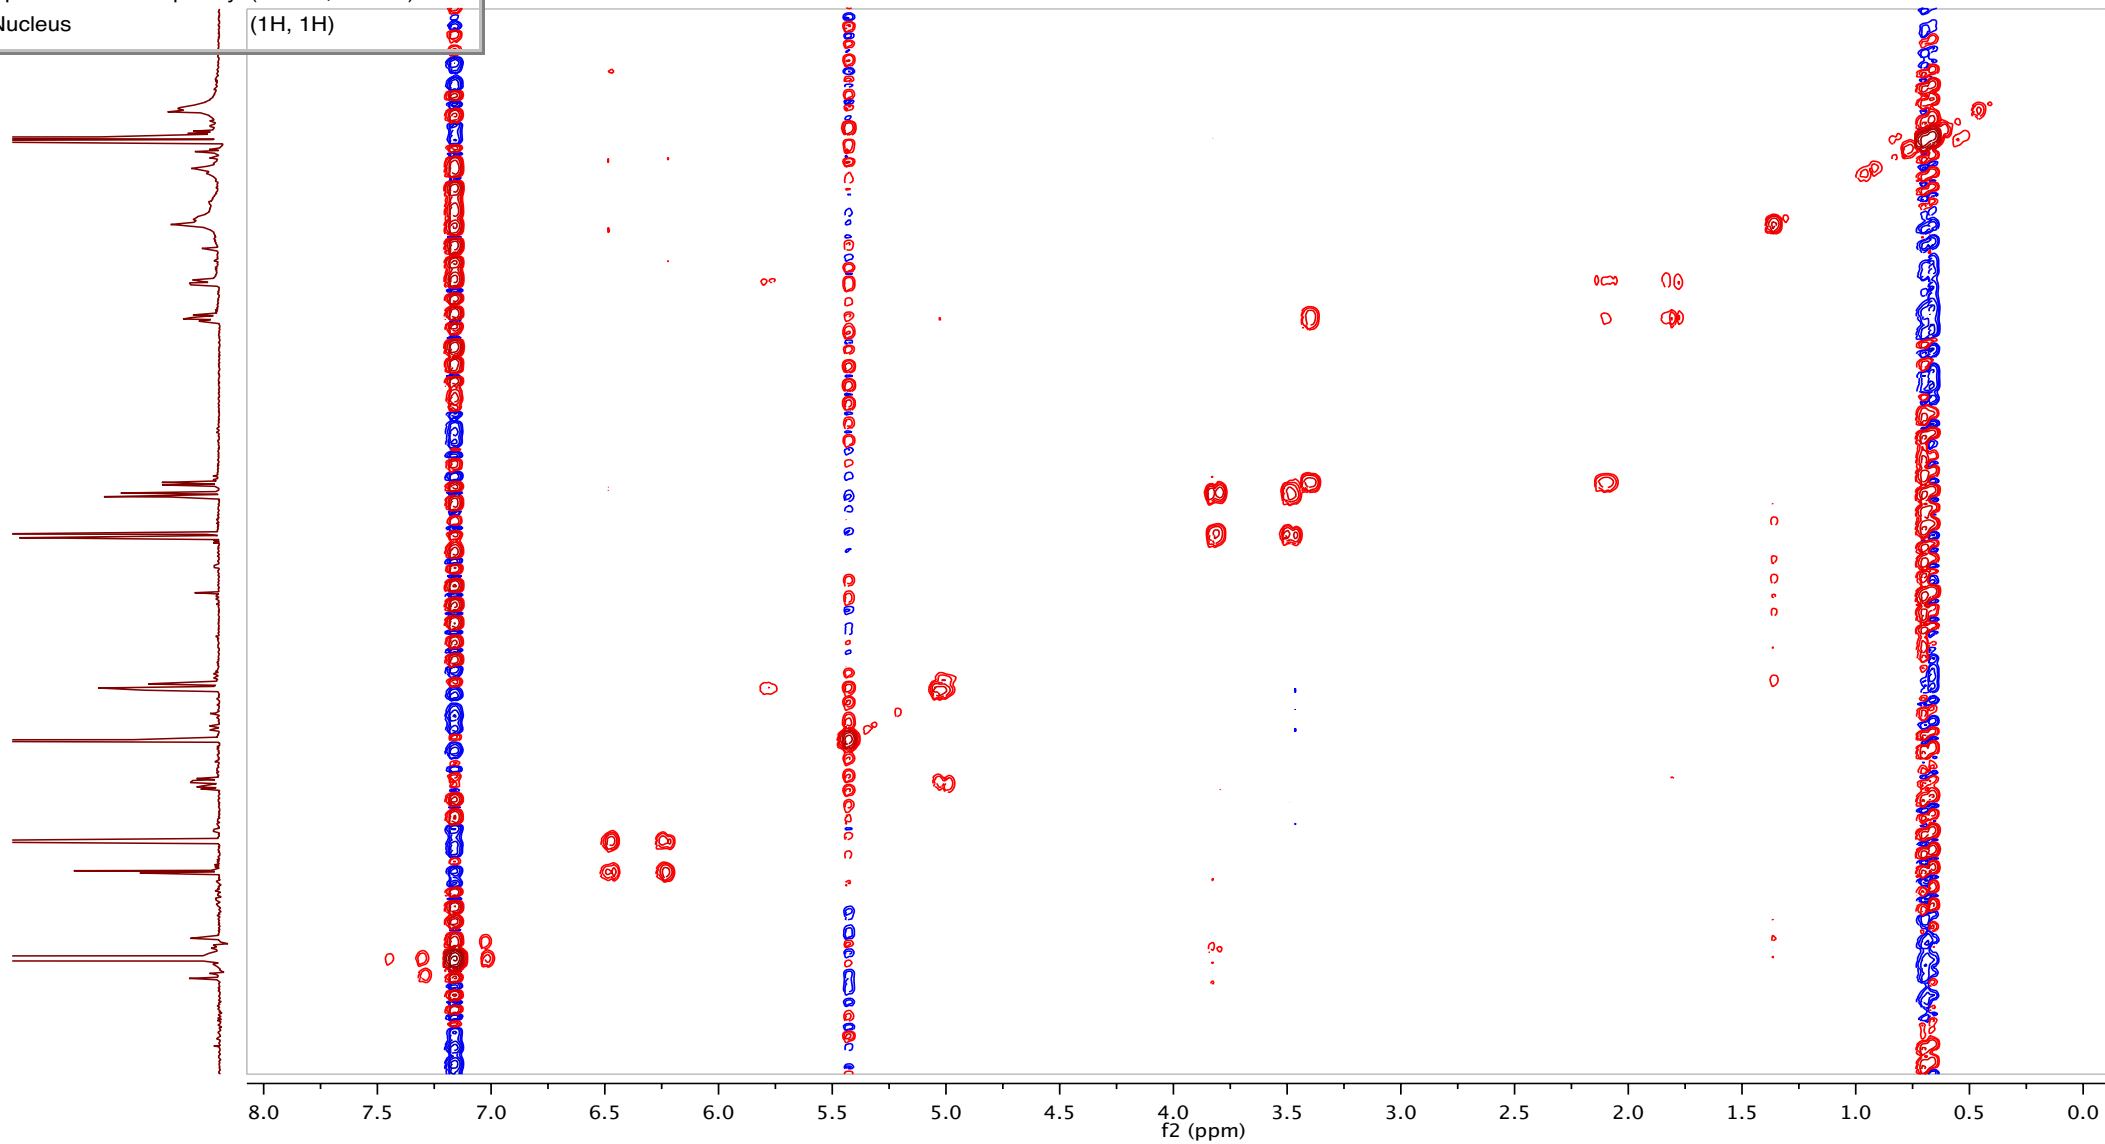

| Parameter              | Value (f2, f1)      |
|------------------------|---------------------|
| Title                  | akm-02-100ahsqc     |
| Spectrometer           | inova               |
| Solvent                | c6d6                |
| Temperature            | 30.0                |
| Number of Scans        | 32                  |
| Relaxation Delay       | 1.0000              |
| Acquisition Date       | 2014-04-03T00:30:00 |
| Spectrometer Frequency | (599.63, 150.79)    |
| Nucleus                | (1H, 13C)           |

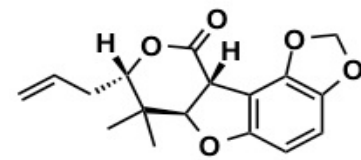

*cis*-S12

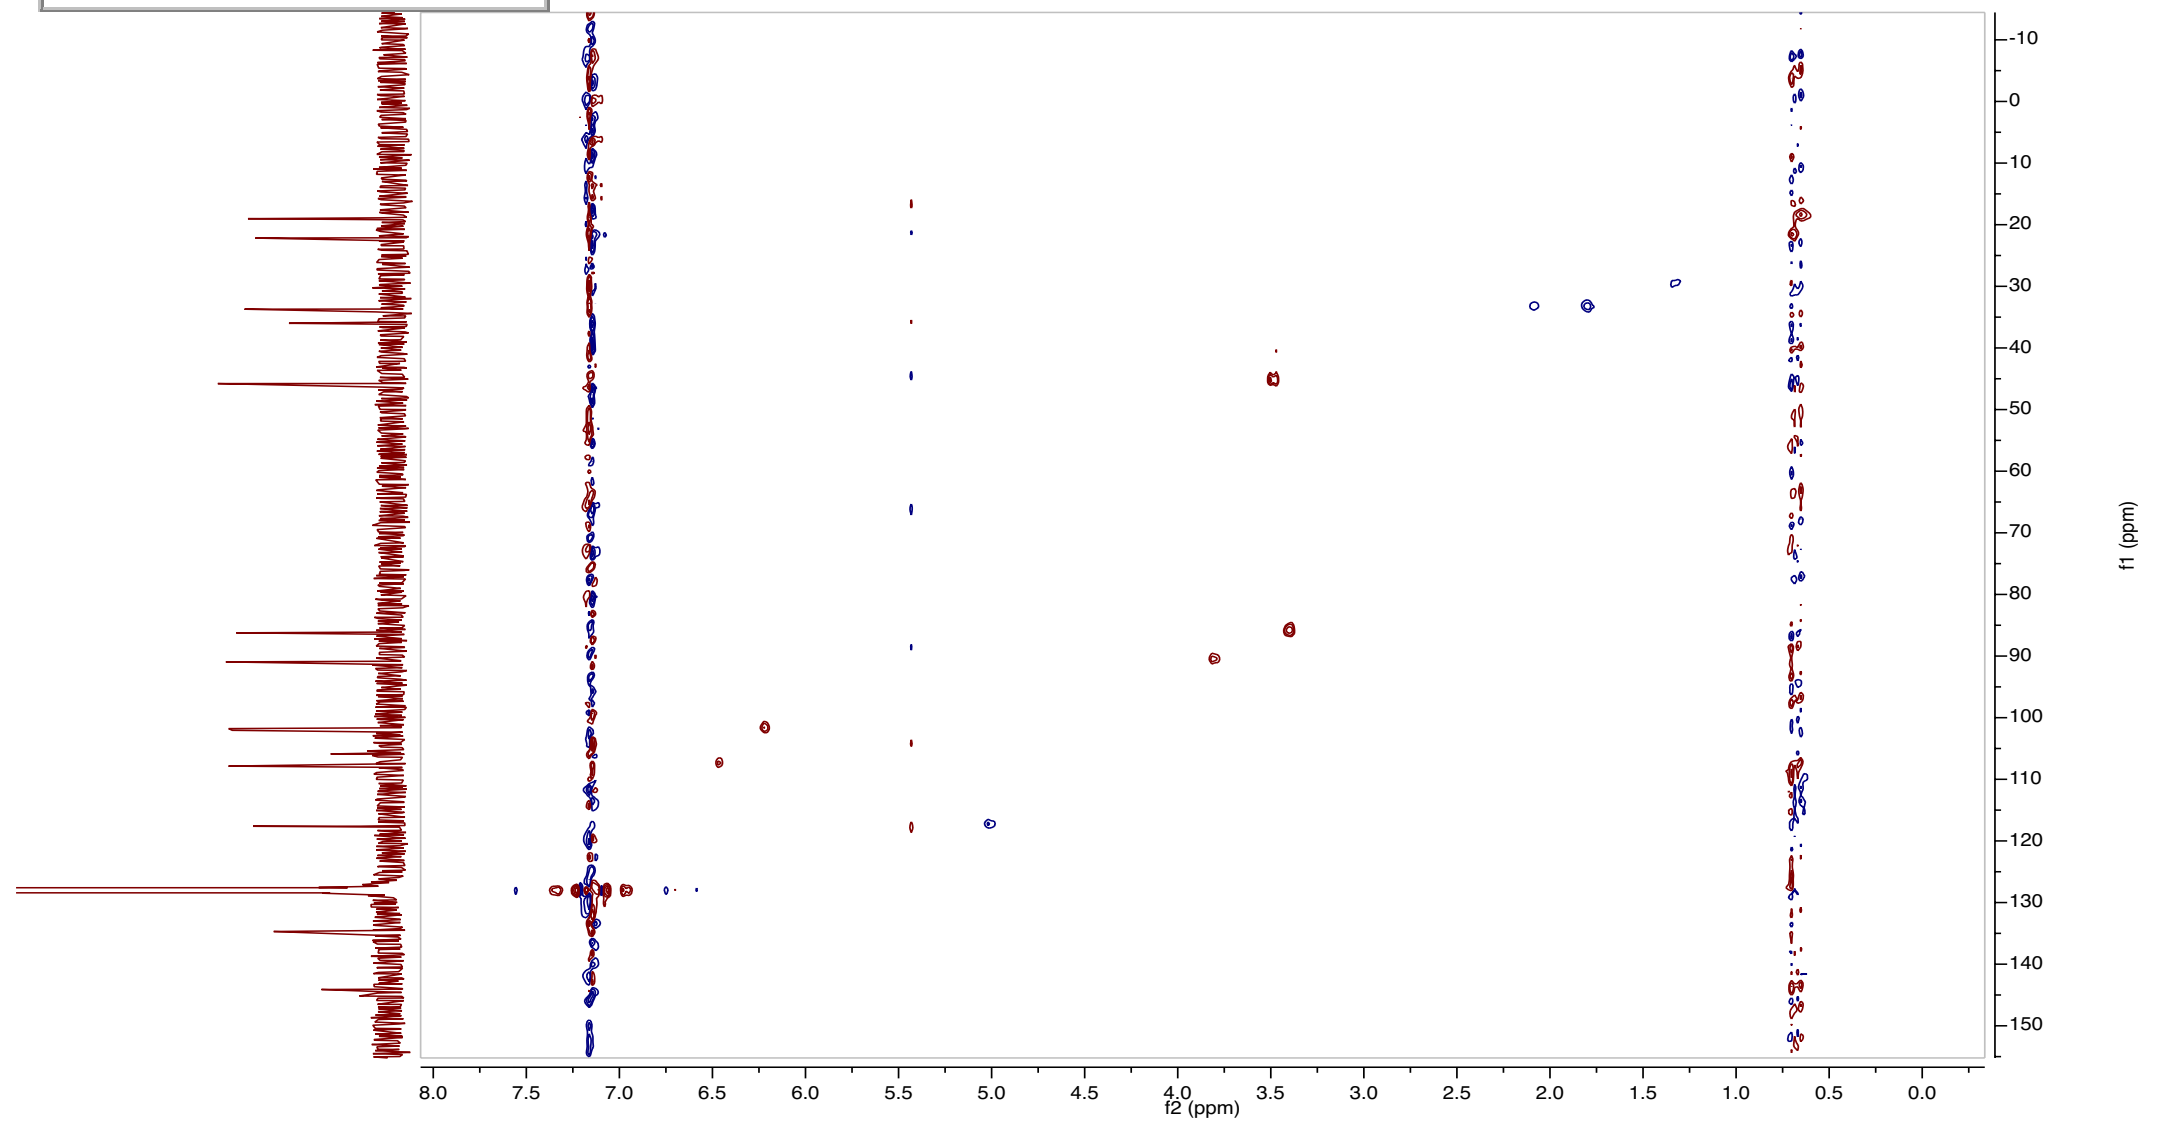

6.449  
6.432  
6.206  
6.189

| Parameter              | Value                         |
|------------------------|-------------------------------|
| Title                  | akm-02-100-a-CYCLONOE-6_46PPM |
| Spectrometer           | inova                         |
| Solvent                | c6d6                          |
| Temperature            | 75.0                          |
| Number of Scans        | 64                            |
| Relaxation Delay       | 14.5000                       |
| Acquisition Date       | 2014-04-01T23:20:51           |
| Spectrometer Frequency | 499.86                        |

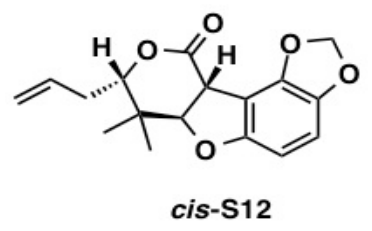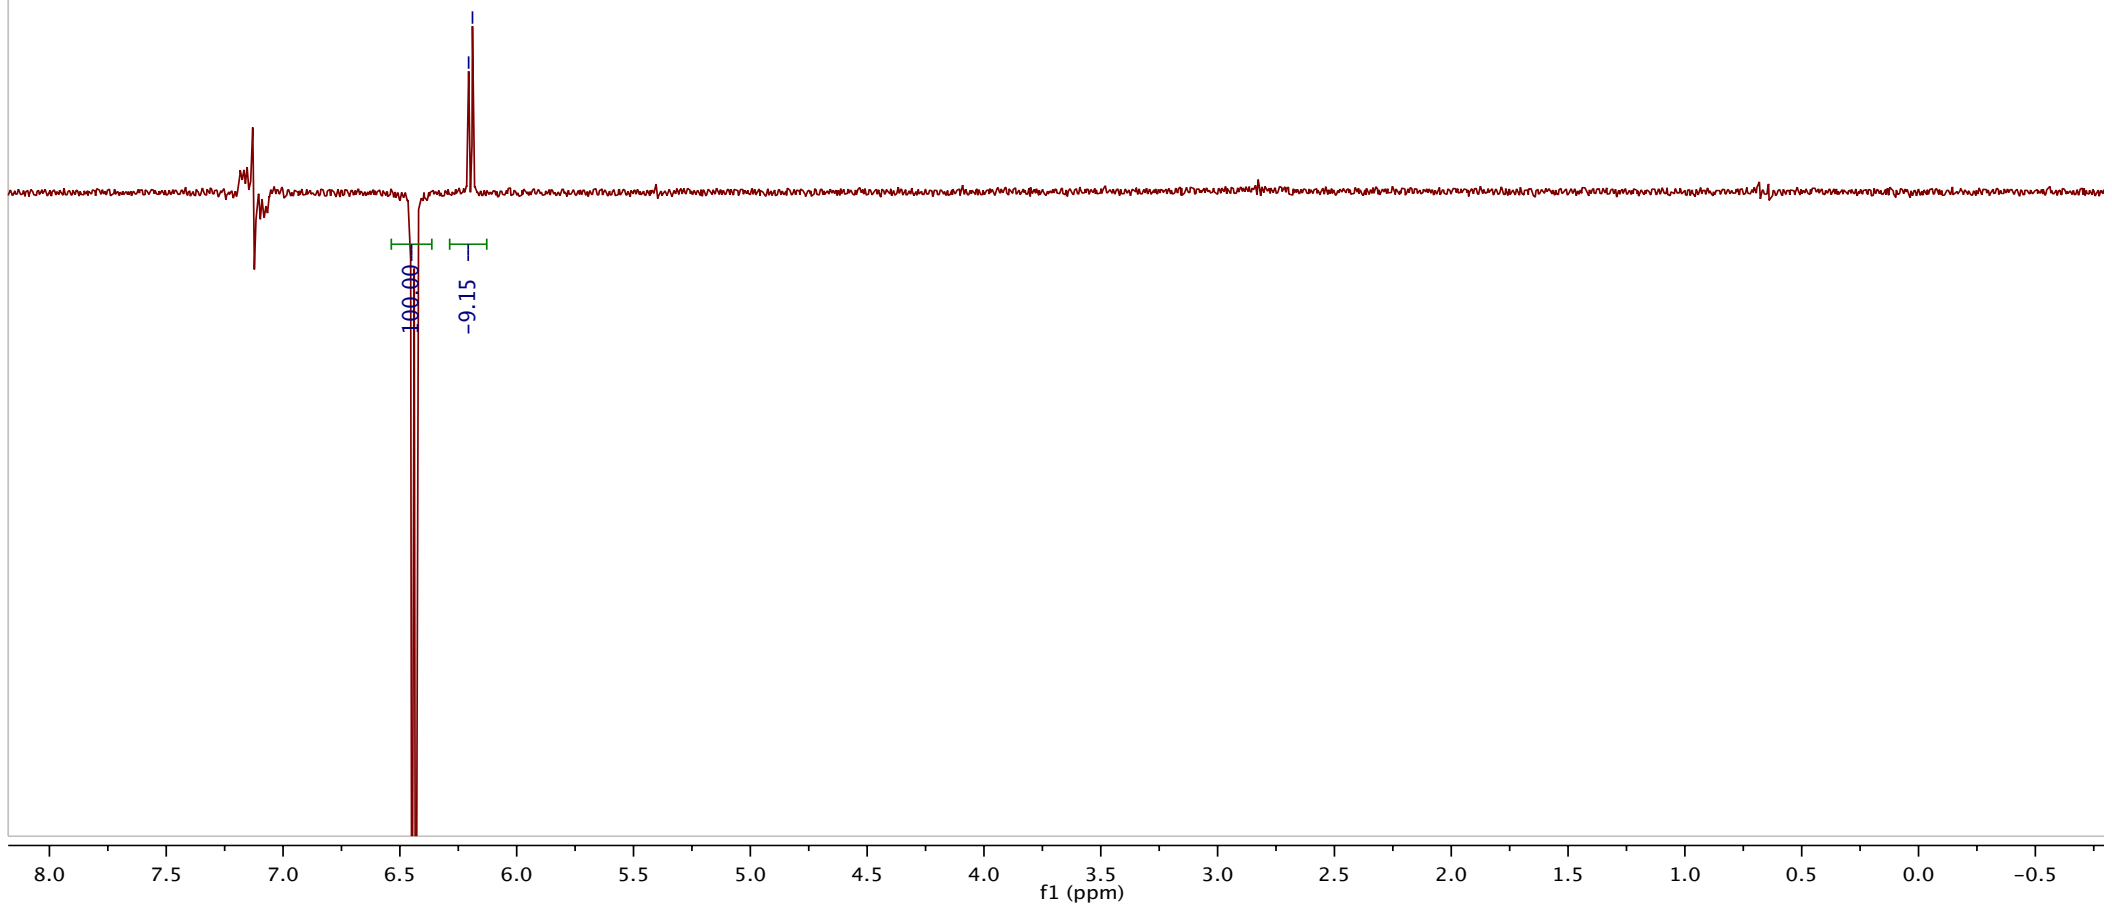

| Parameter              | Value                         |
|------------------------|-------------------------------|
| Title                  | akm-02-100-a-CYCLONOE-3_50PPM |
| Spectrometer           | inova                         |
| Solvent                | CDCl3                         |
| Temperature            | 25.0                          |
| Number of Scans        | 64                            |
| Relaxation Delay       | 14.5000                       |
| Acquisition Date       | 2014-03-31 T22:34:26          |
| Spectrometer Frequency | 499.86                        |

3.556  
3.526  
3.471  
3.464  
3.450  
3.444

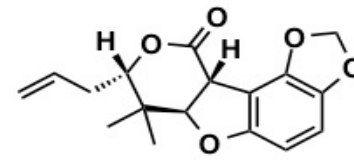

*cis*-S12

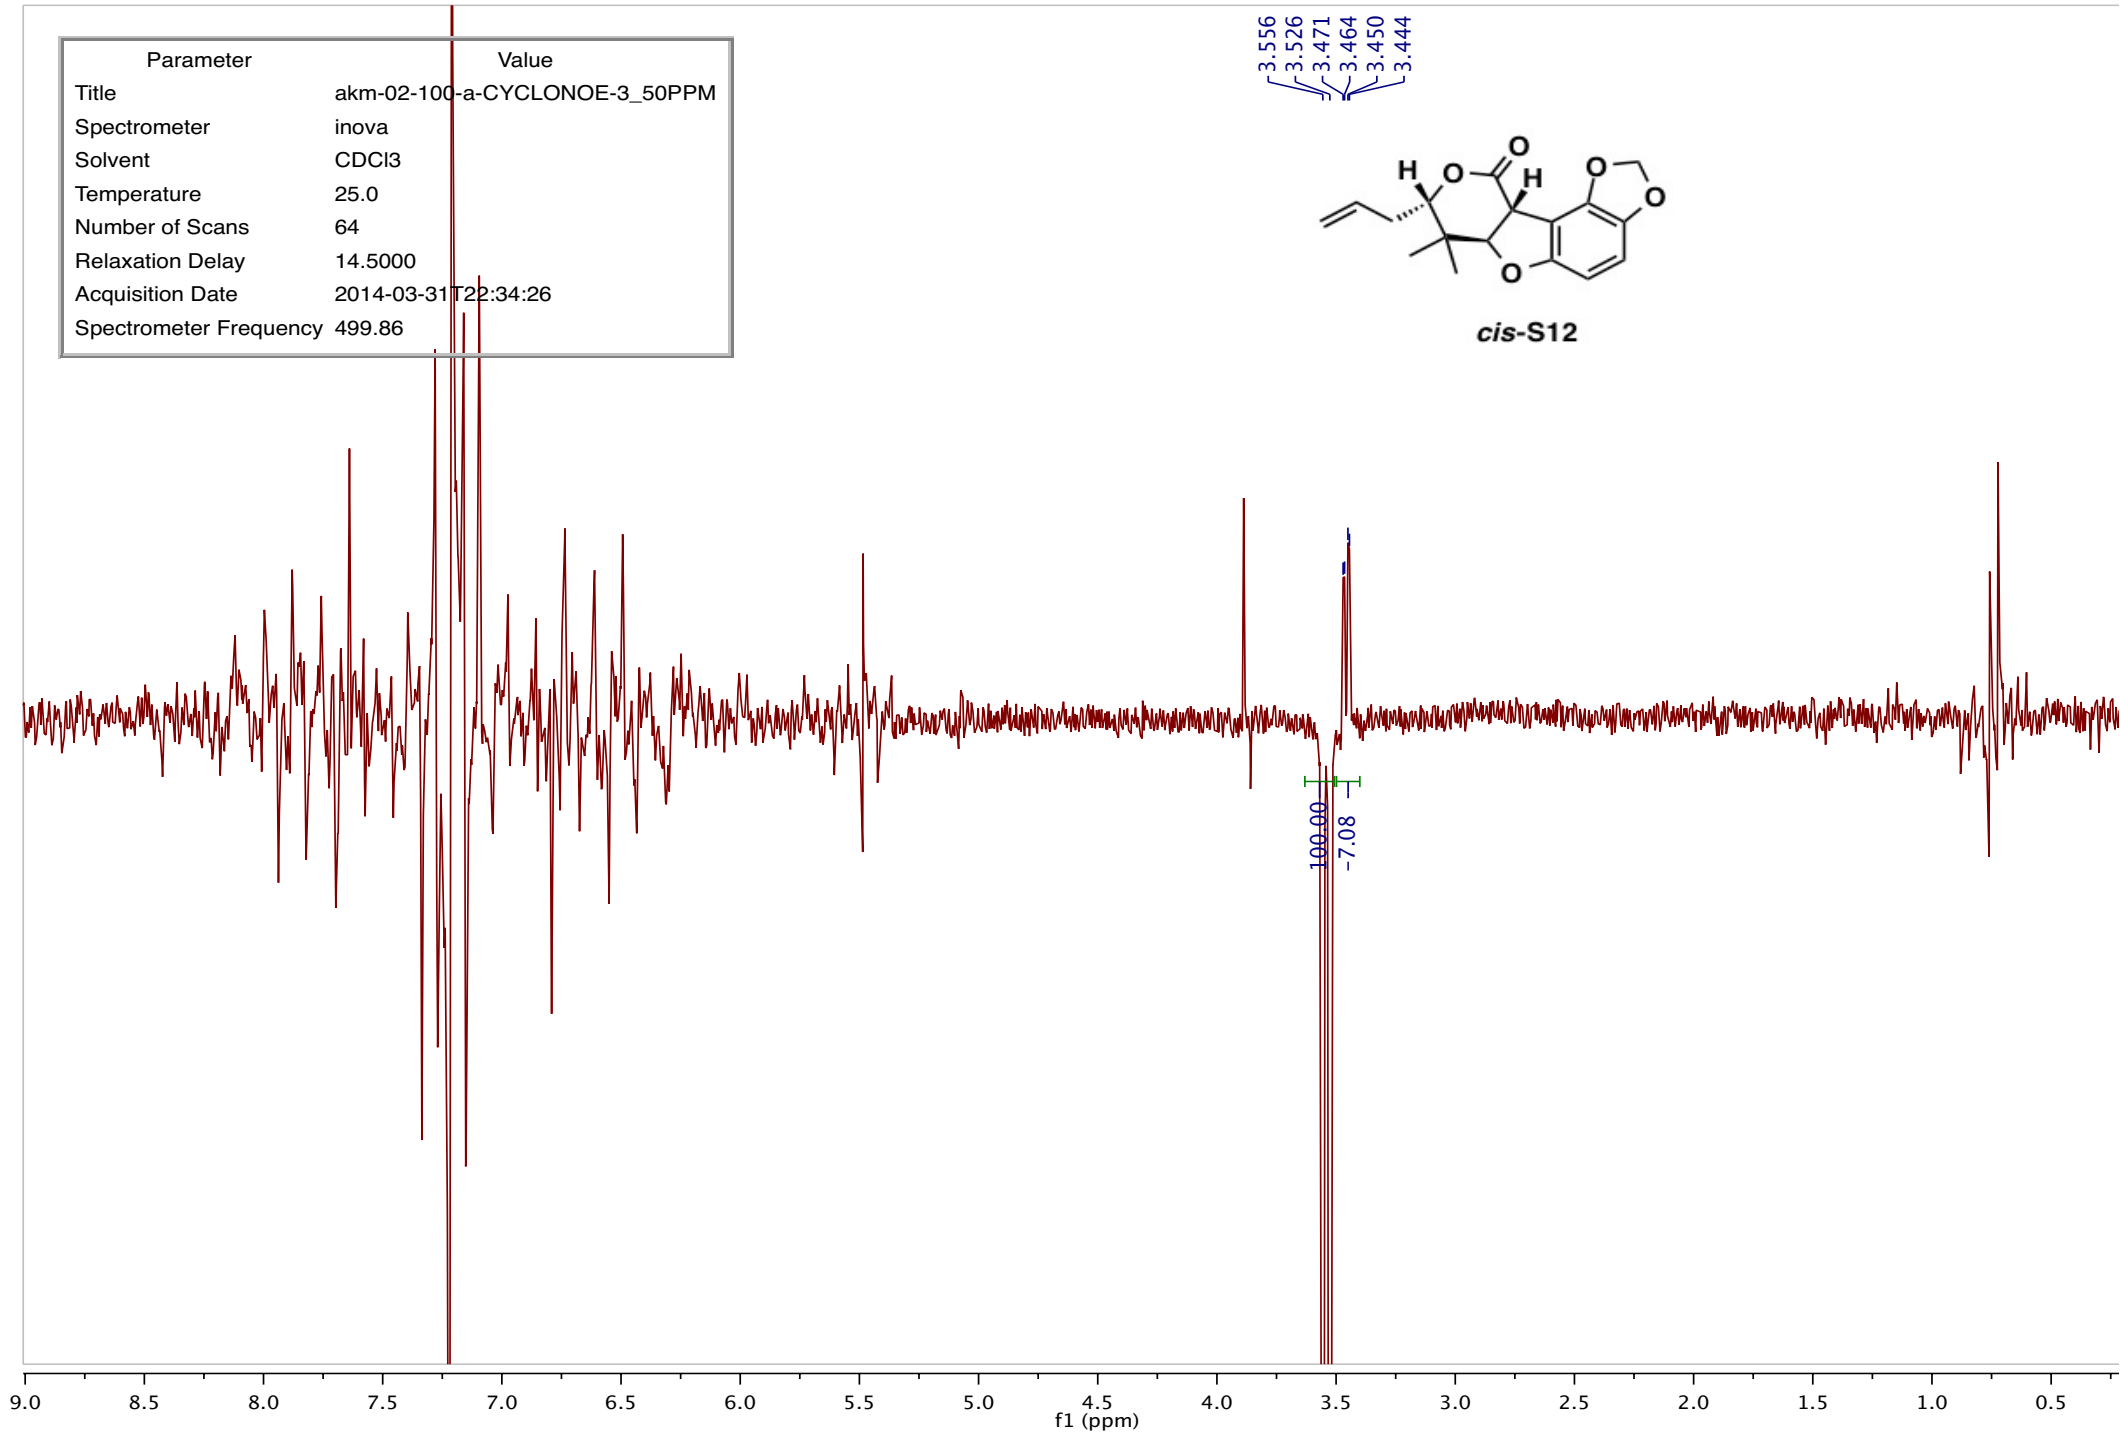



| Parameter              | Value                         |
|------------------------|-------------------------------|
| Title                  | akm-02-100-a-CYCLONOE-3_41PPM |
| Spectrometer           | inova                         |
| Solvent                | CDCl3                         |
| Temperature            | 25.0                          |
| Number of Scans        | 64                            |
| Relaxation Delay       | 14.5000                       |
| Acquisition Date       | 2014-03-31T21:52:12           |
| Spectrometer Frequency | 499.86                        |

2.915  
2.885  
2.830  
2.824  
2.810  
2.804

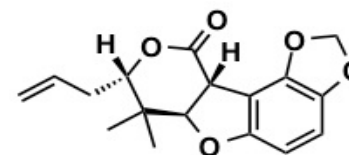

*cis*-S12

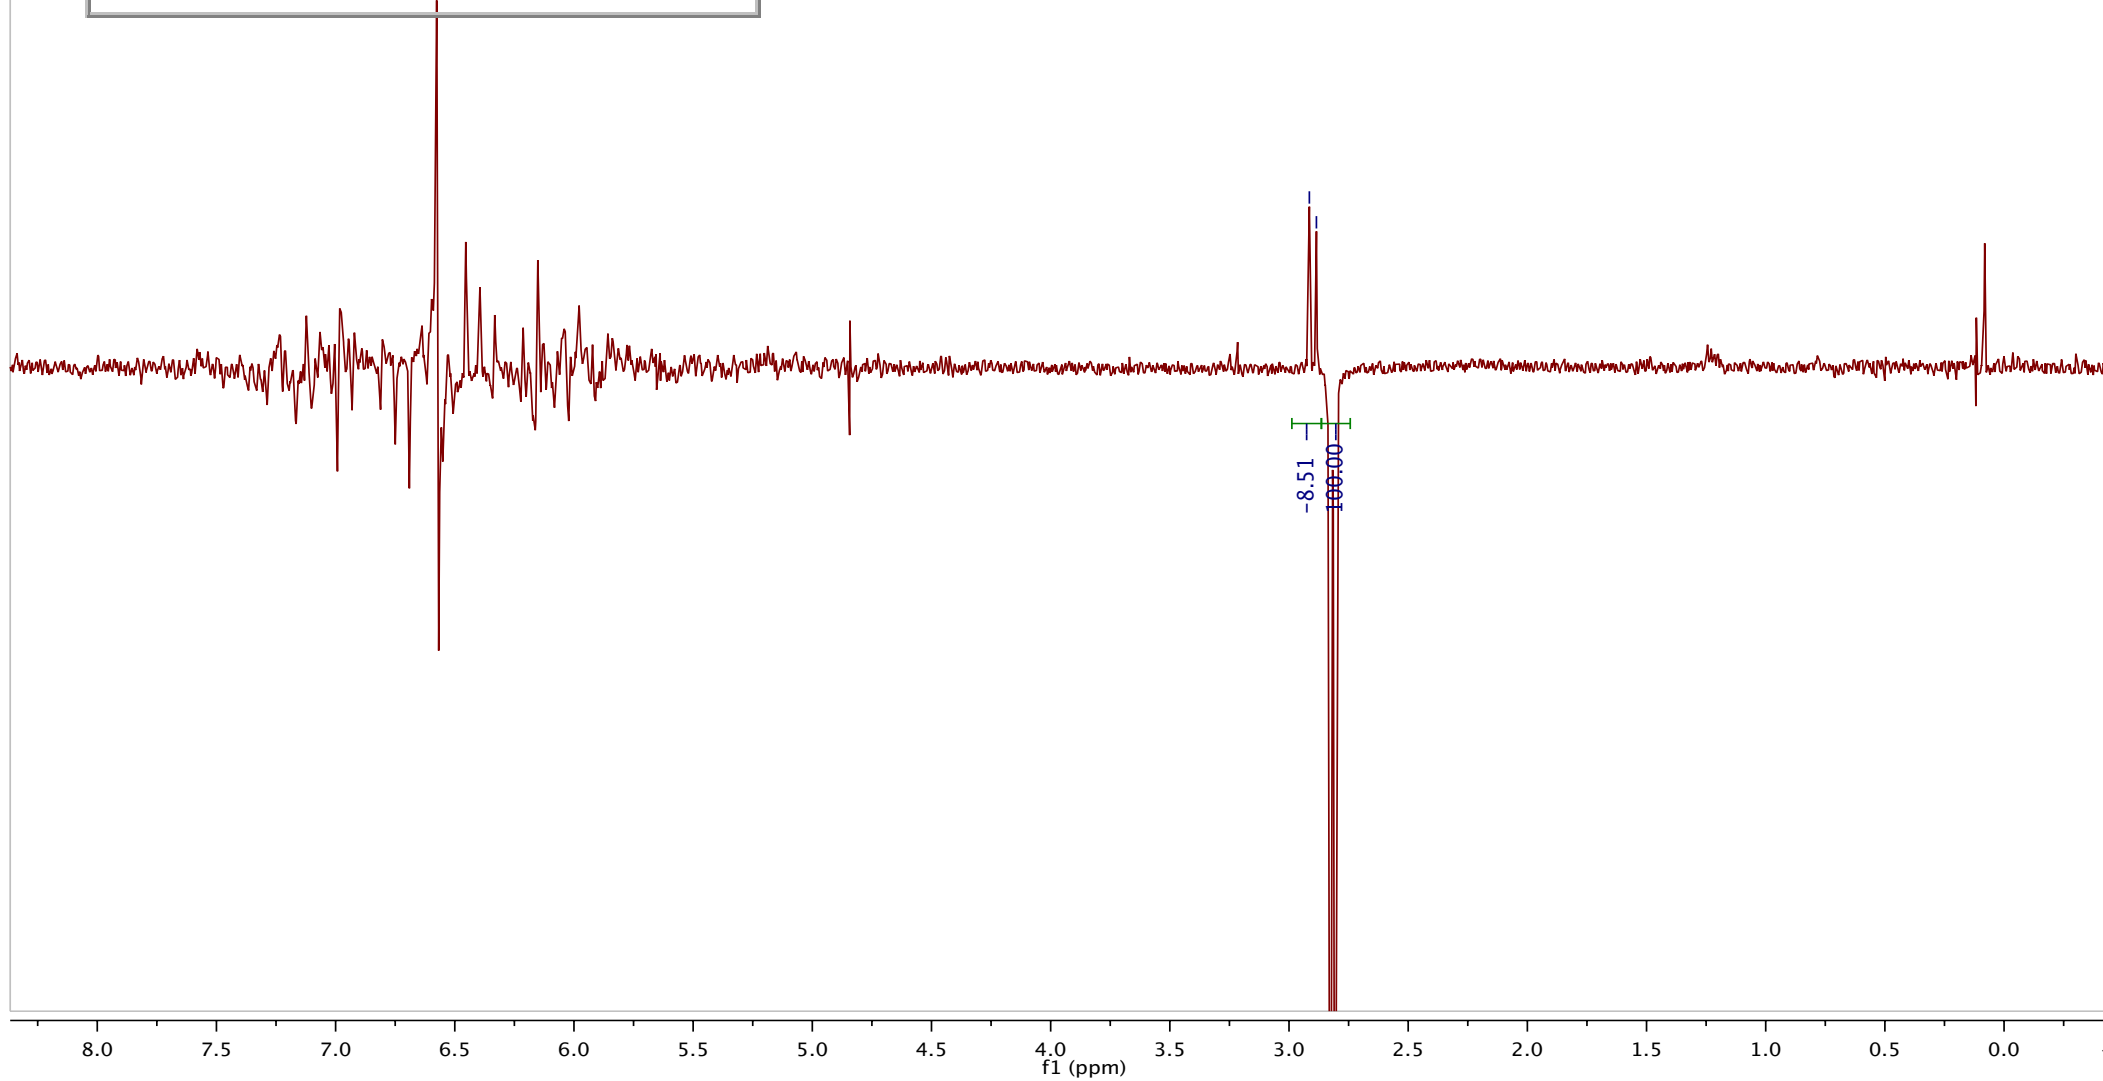

| Parameter              | Value                         |
|------------------------|-------------------------------|
| Title                  | akm-02-100-a-CYCLONOE-1_82PPM |
| Spectrometer           | inova                         |
| Solvent                | CDCl3                         |
| Temperature            | 25.0                          |
| Number of Scans        | 64                            |
| Relaxation Delay       | 14.5000                       |
| Acquisition Date       | 2014-04-01T00:41:35           |
| Spectrometer Frequency | 499.86                        |

3.461  
3.440  
2.159  
2.147  
2.138  
2.127  
1.889  
1.883  
1.873  
1.867  
1.860  
1.854  
1.844  
0.757  
0.722

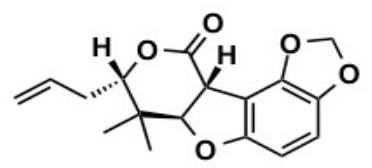

*cis*-S12

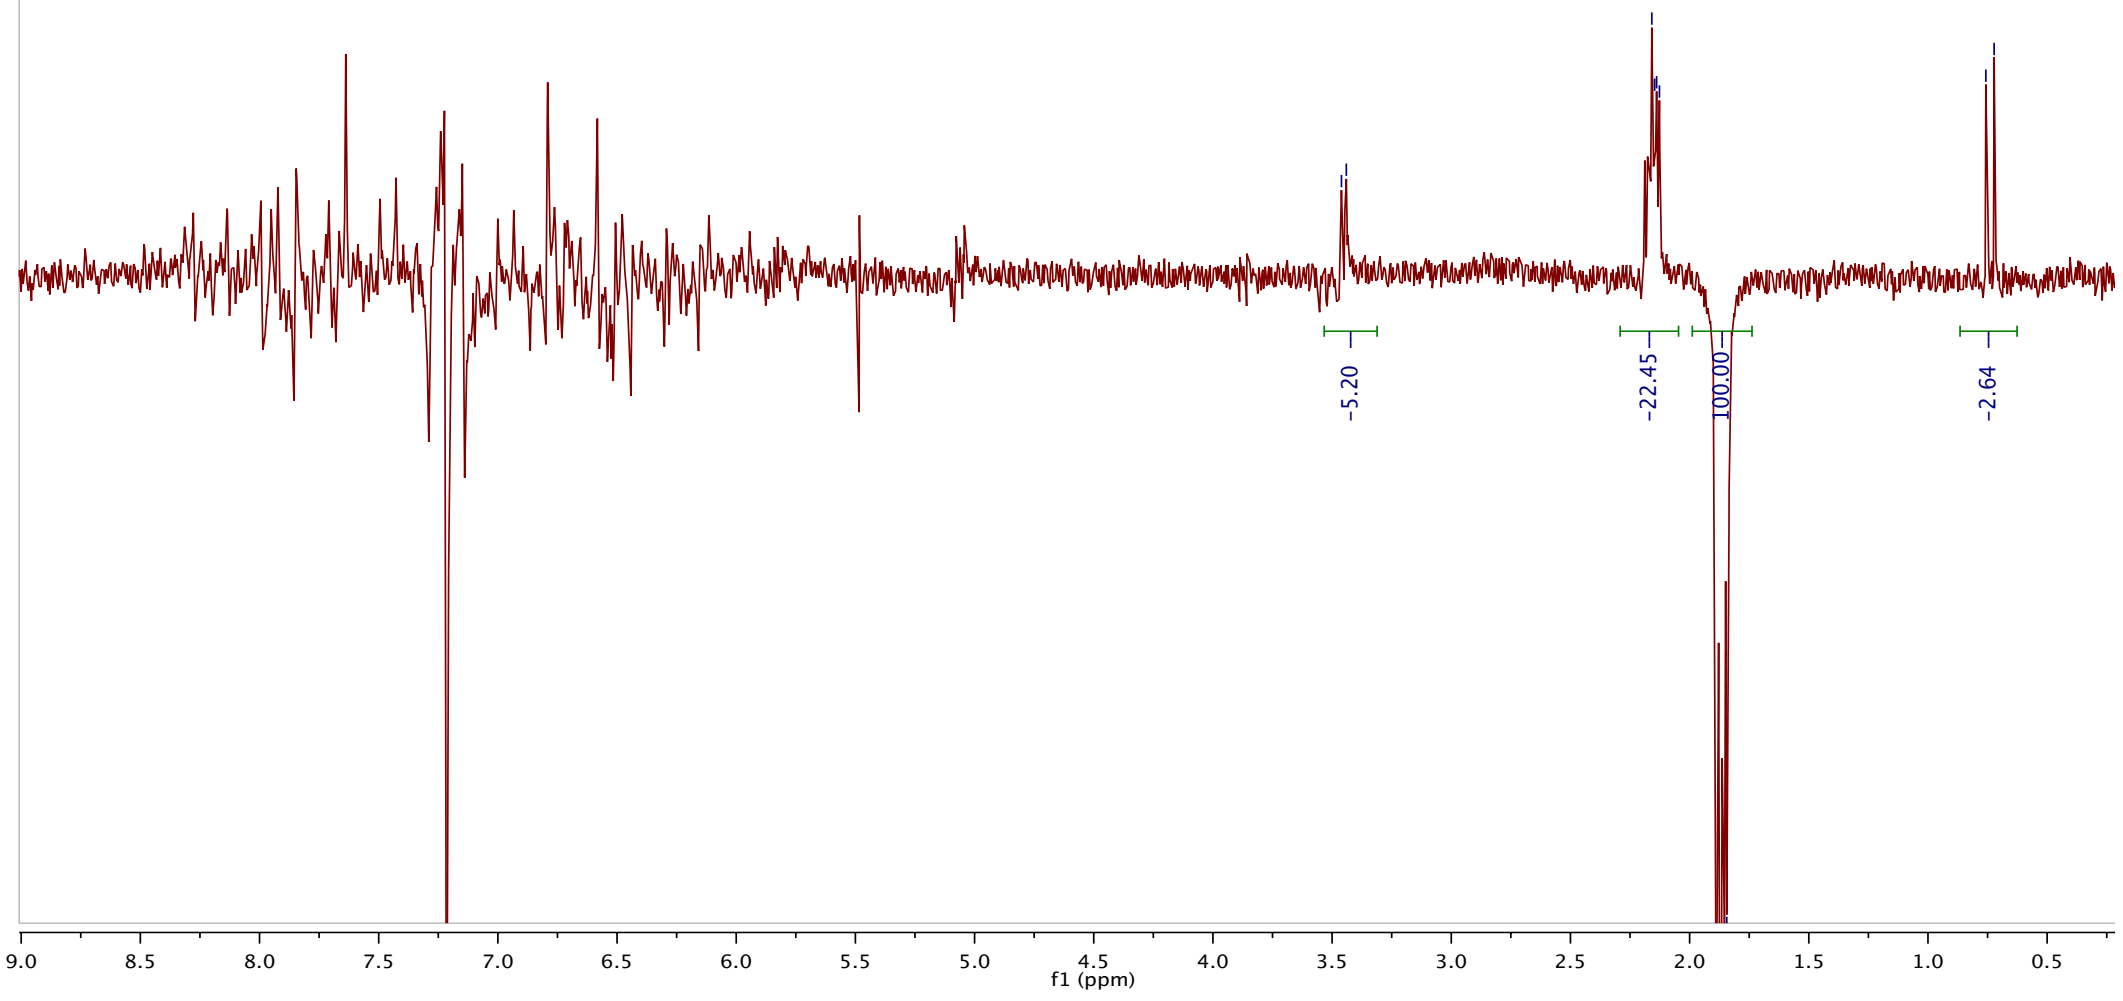

| Parameter              | Value                         |
|------------------------|-------------------------------|
| Title                  | akm-02-100-a-CYCLONOE-0_68PPM |
| Spectrometer           | inova                         |
| Solvent                | c6d6                          |
| Temperature            | 75.0                          |
| Number of Scans        | 64                            |
| Relaxation Delay       | 14.5000                       |
| Acquisition Date       | 2014-04-02T02:55:53           |
| Spectrometer Frequency | 499.86                        |

compound **S11**



*cis*-**S12**

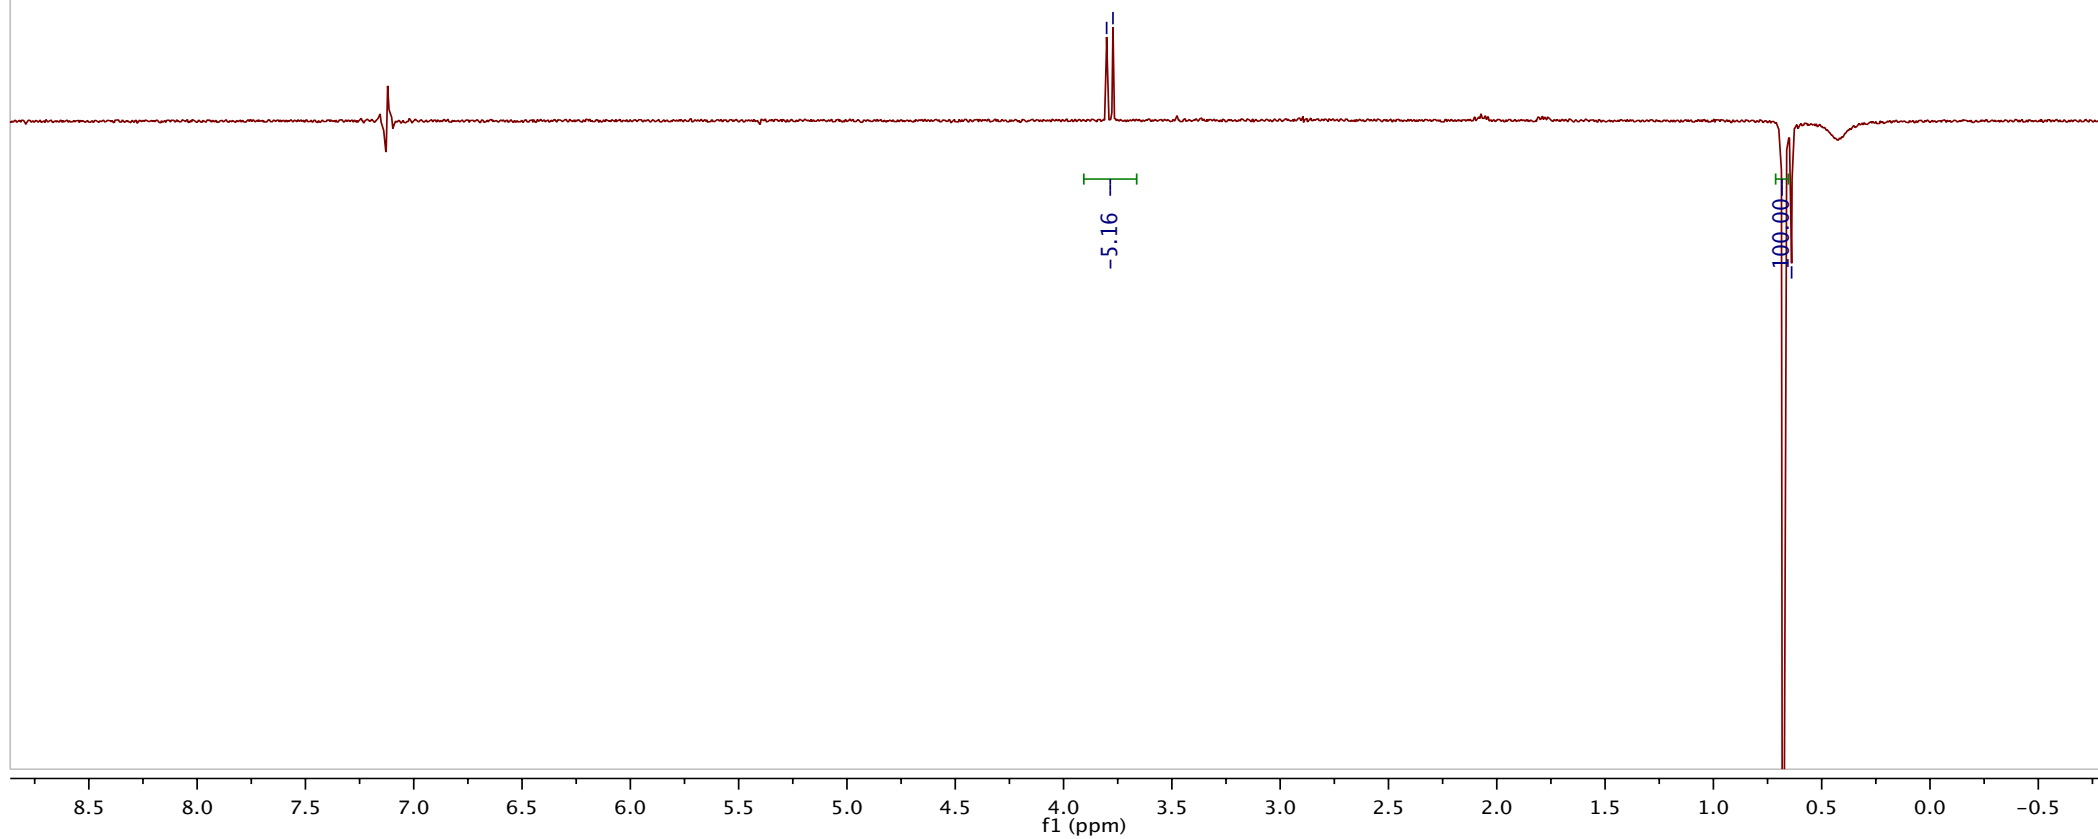

| Parameter              | Value                         |
|------------------------|-------------------------------|
| Title                  | akm-02-100-a-CYCLONOE-0_64PPM |
| Spectrometer           | inova                         |
| Solvent                | c6d6                          |
| Temperature            | 75.0                          |
| Number of Scans        | 64                            |
| Relaxation Delay       | 14.5000                       |
| Acquisition Date       | 2014-04-02T03:38:29           |
| Spectrometer Frequency | 499.86                        |

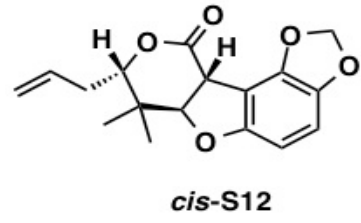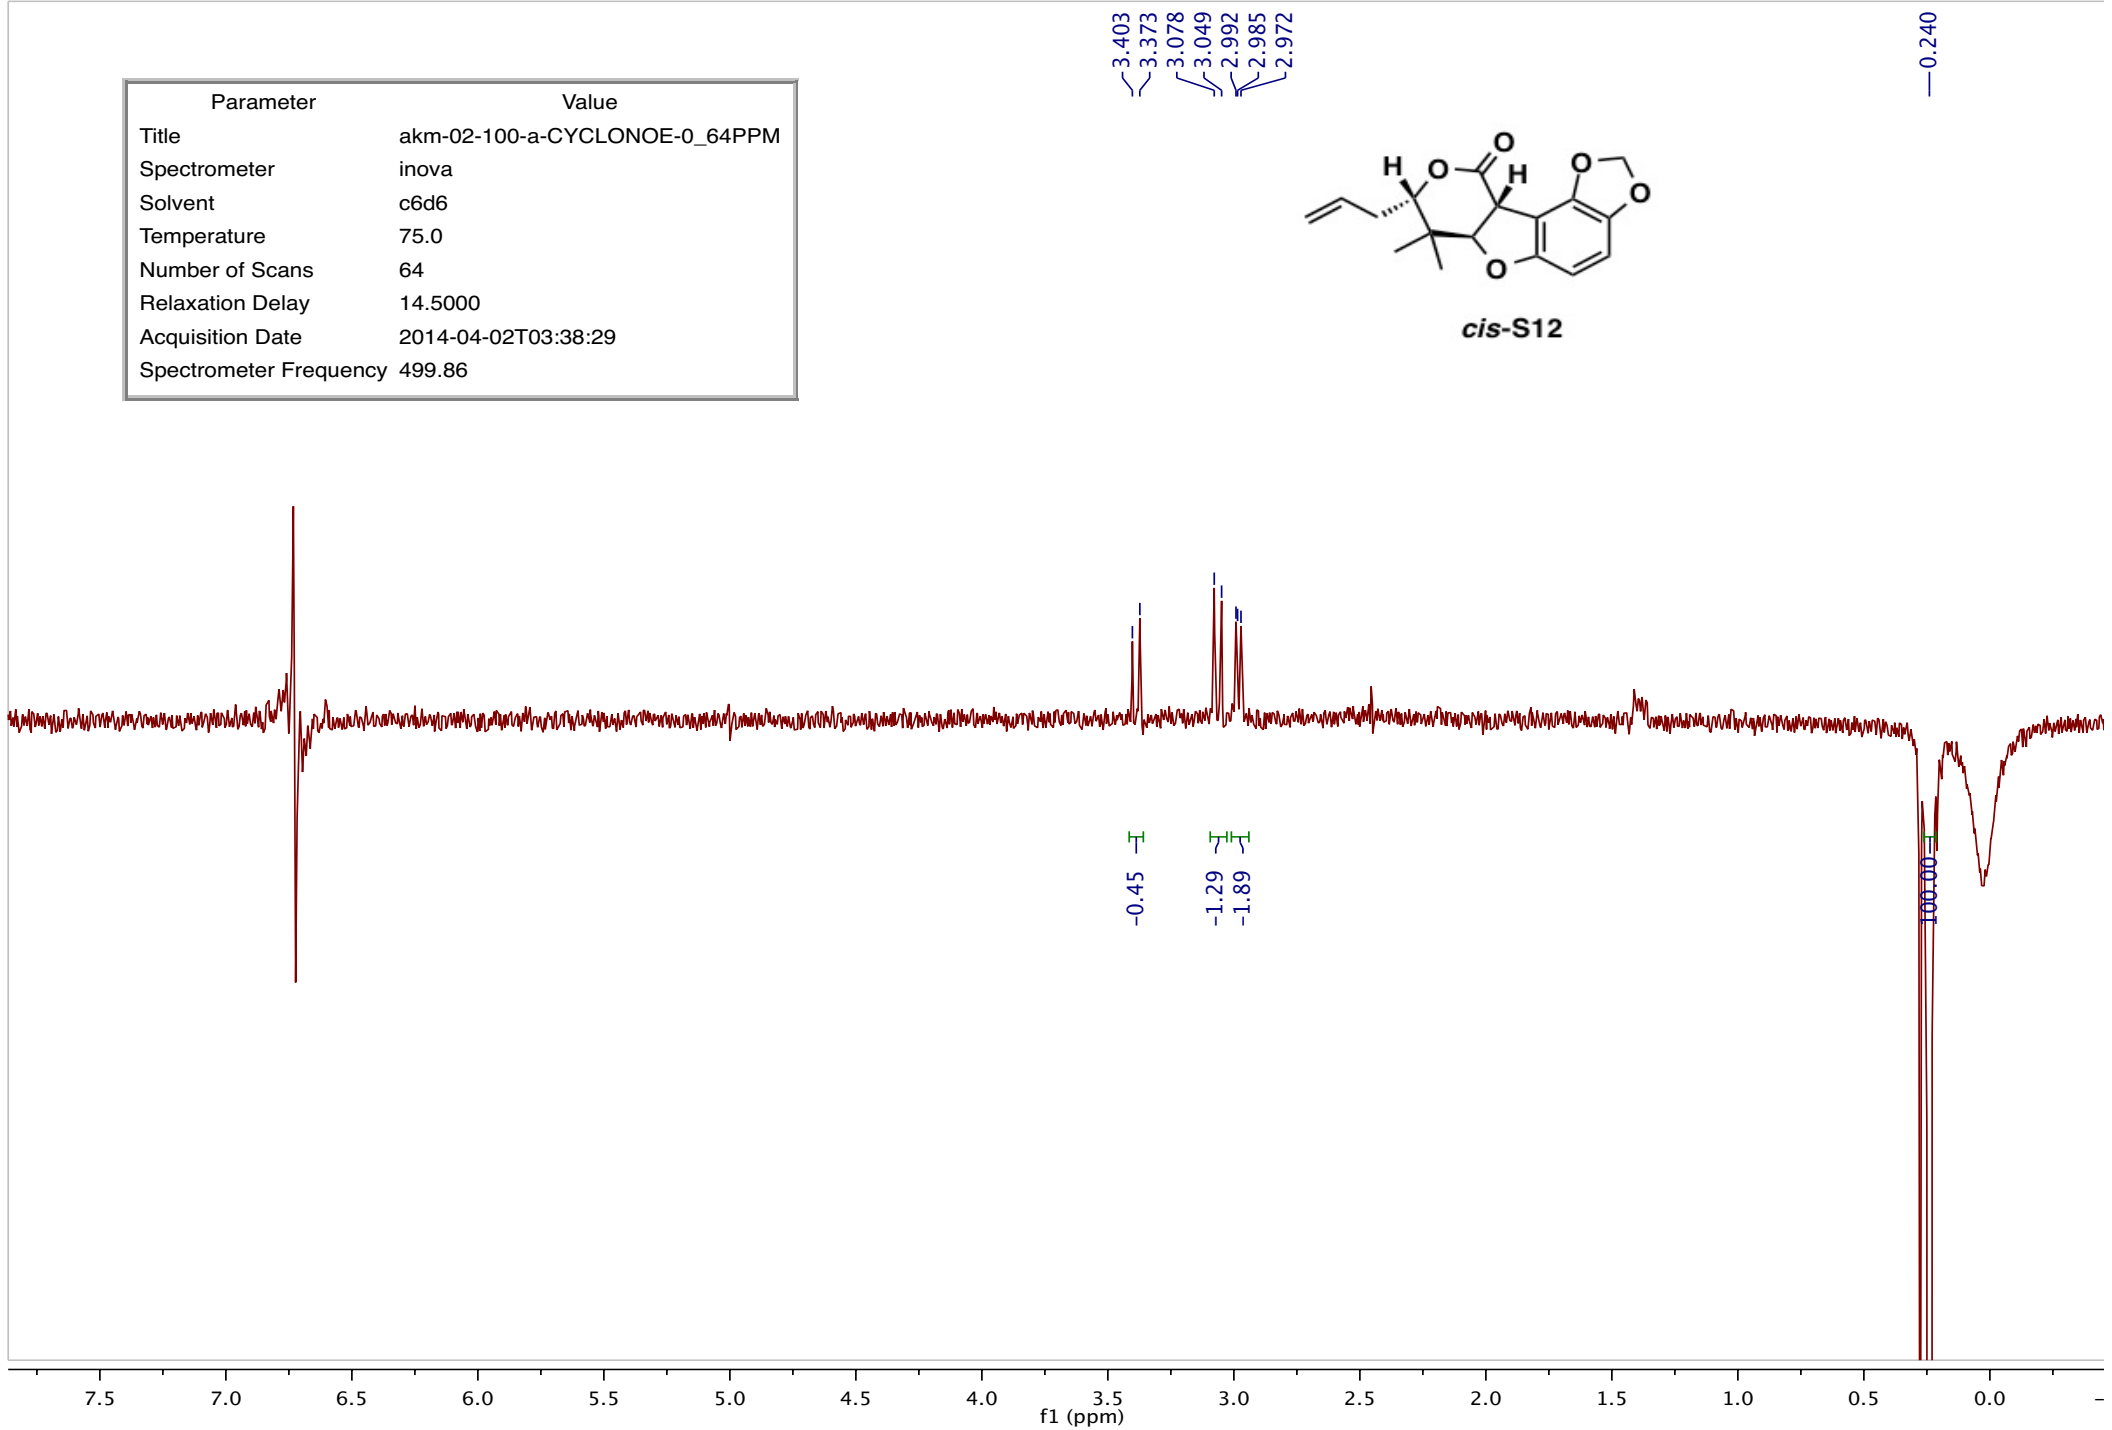

7.260  
6.643  
6.642  
6.627  
6.625  
6.236  
6.219  
6.006  
6.003  
5.952  
5.949  
5.909  
5.889  
5.876  
5.856  
5.855  
5.159  
5.156  
5.152  
5.149  
5.125  
5.121  
5.118  
5.115  
5.104  
5.102  
5.099  
5.096  
5.084  
5.081  
5.078  
5.076  
5.076  
4.602  
4.585  
4.443  
4.426  
4.410  
4.403  
4.391  
4.384  
2.388  
2.385  
2.375  
2.372  
2.369  
2.356  
2.353  
2.350  
2.347  
2.339  
2.336  
2.333

| Parameter              | Value               |
|------------------------|---------------------|
| Title                  | AKM-02-145.2        |
| Spectrometer           | inova               |
| Solvent                | CDCl3               |
| Temperature            | 80.0                |
| Number of Scans        | 24                  |
| Relaxation Delay       | 4.8000              |
| Acquisition Date       | 2014-04-25T11:52:39 |
| Spectrometer Frequency | 499.86              |

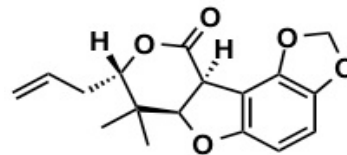

*trans*-S12

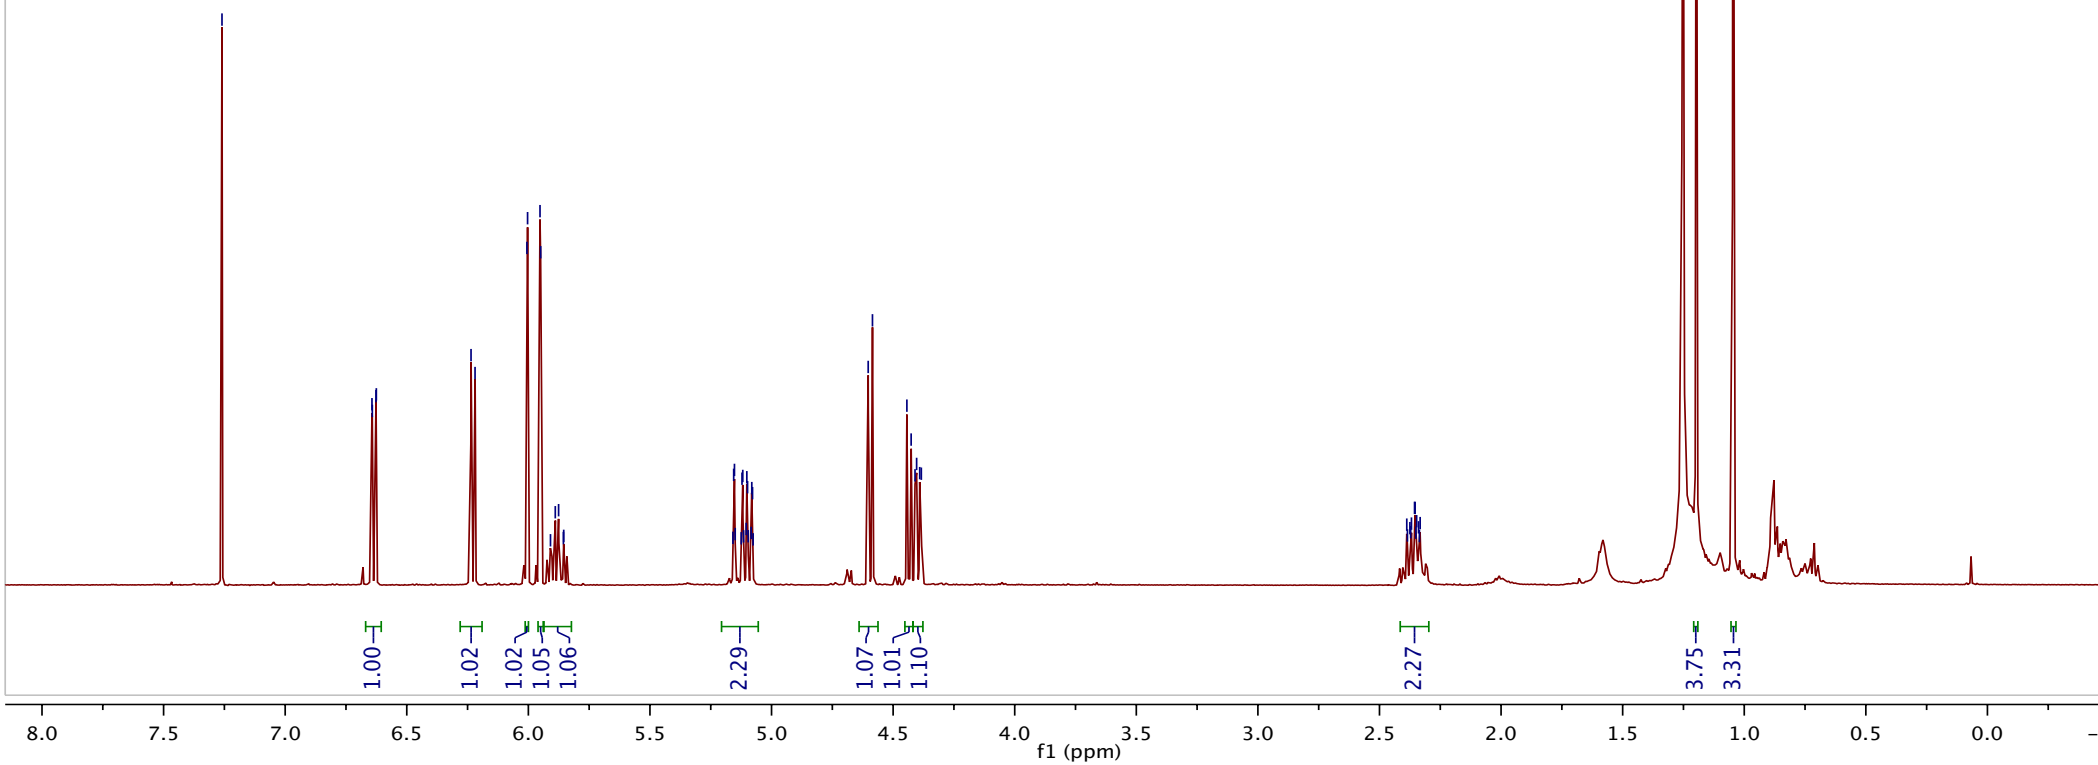

| Parameter              | Value               |
|------------------------|---------------------|
| Title                  | AKM-02-148.13C      |
| Spectrometer           | inova               |
| Solvent                | cdcl3               |
| Temperature            | 25.0                |
| Number of Scans        | 124                 |
| Relaxation Delay       | 1.0000              |
| Acquisition Date       | 2014-04-28T14:59:43 |
| Spectrometer Frequency | 150.79              |

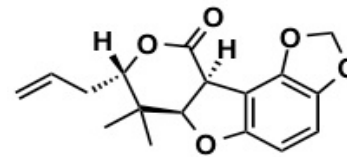

*trans*-S12

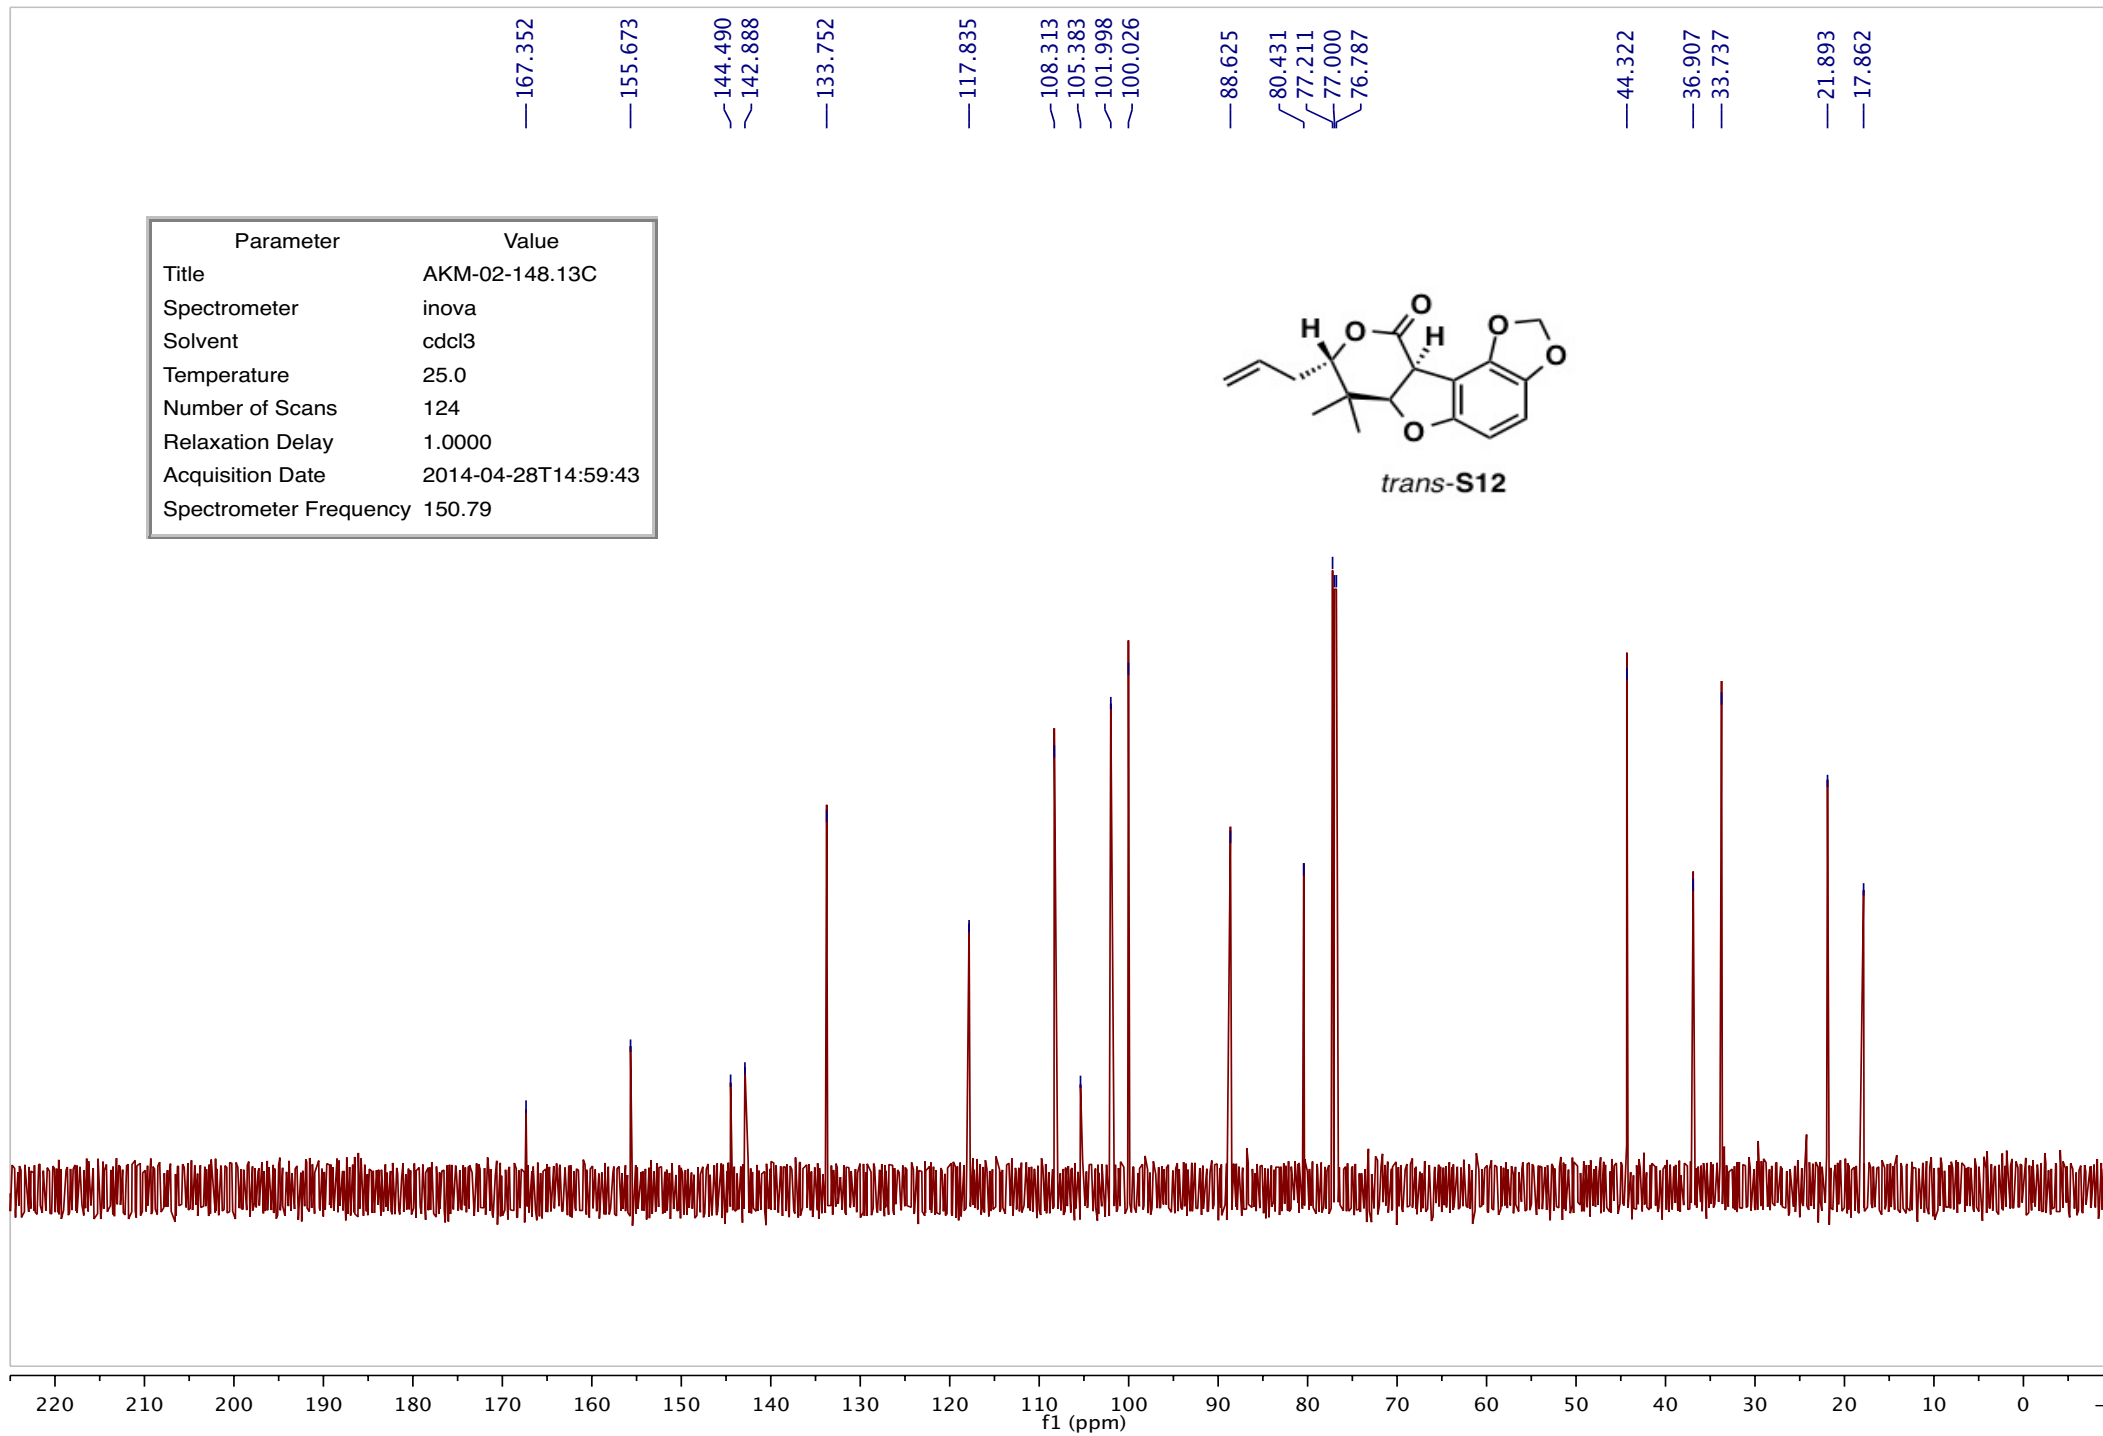

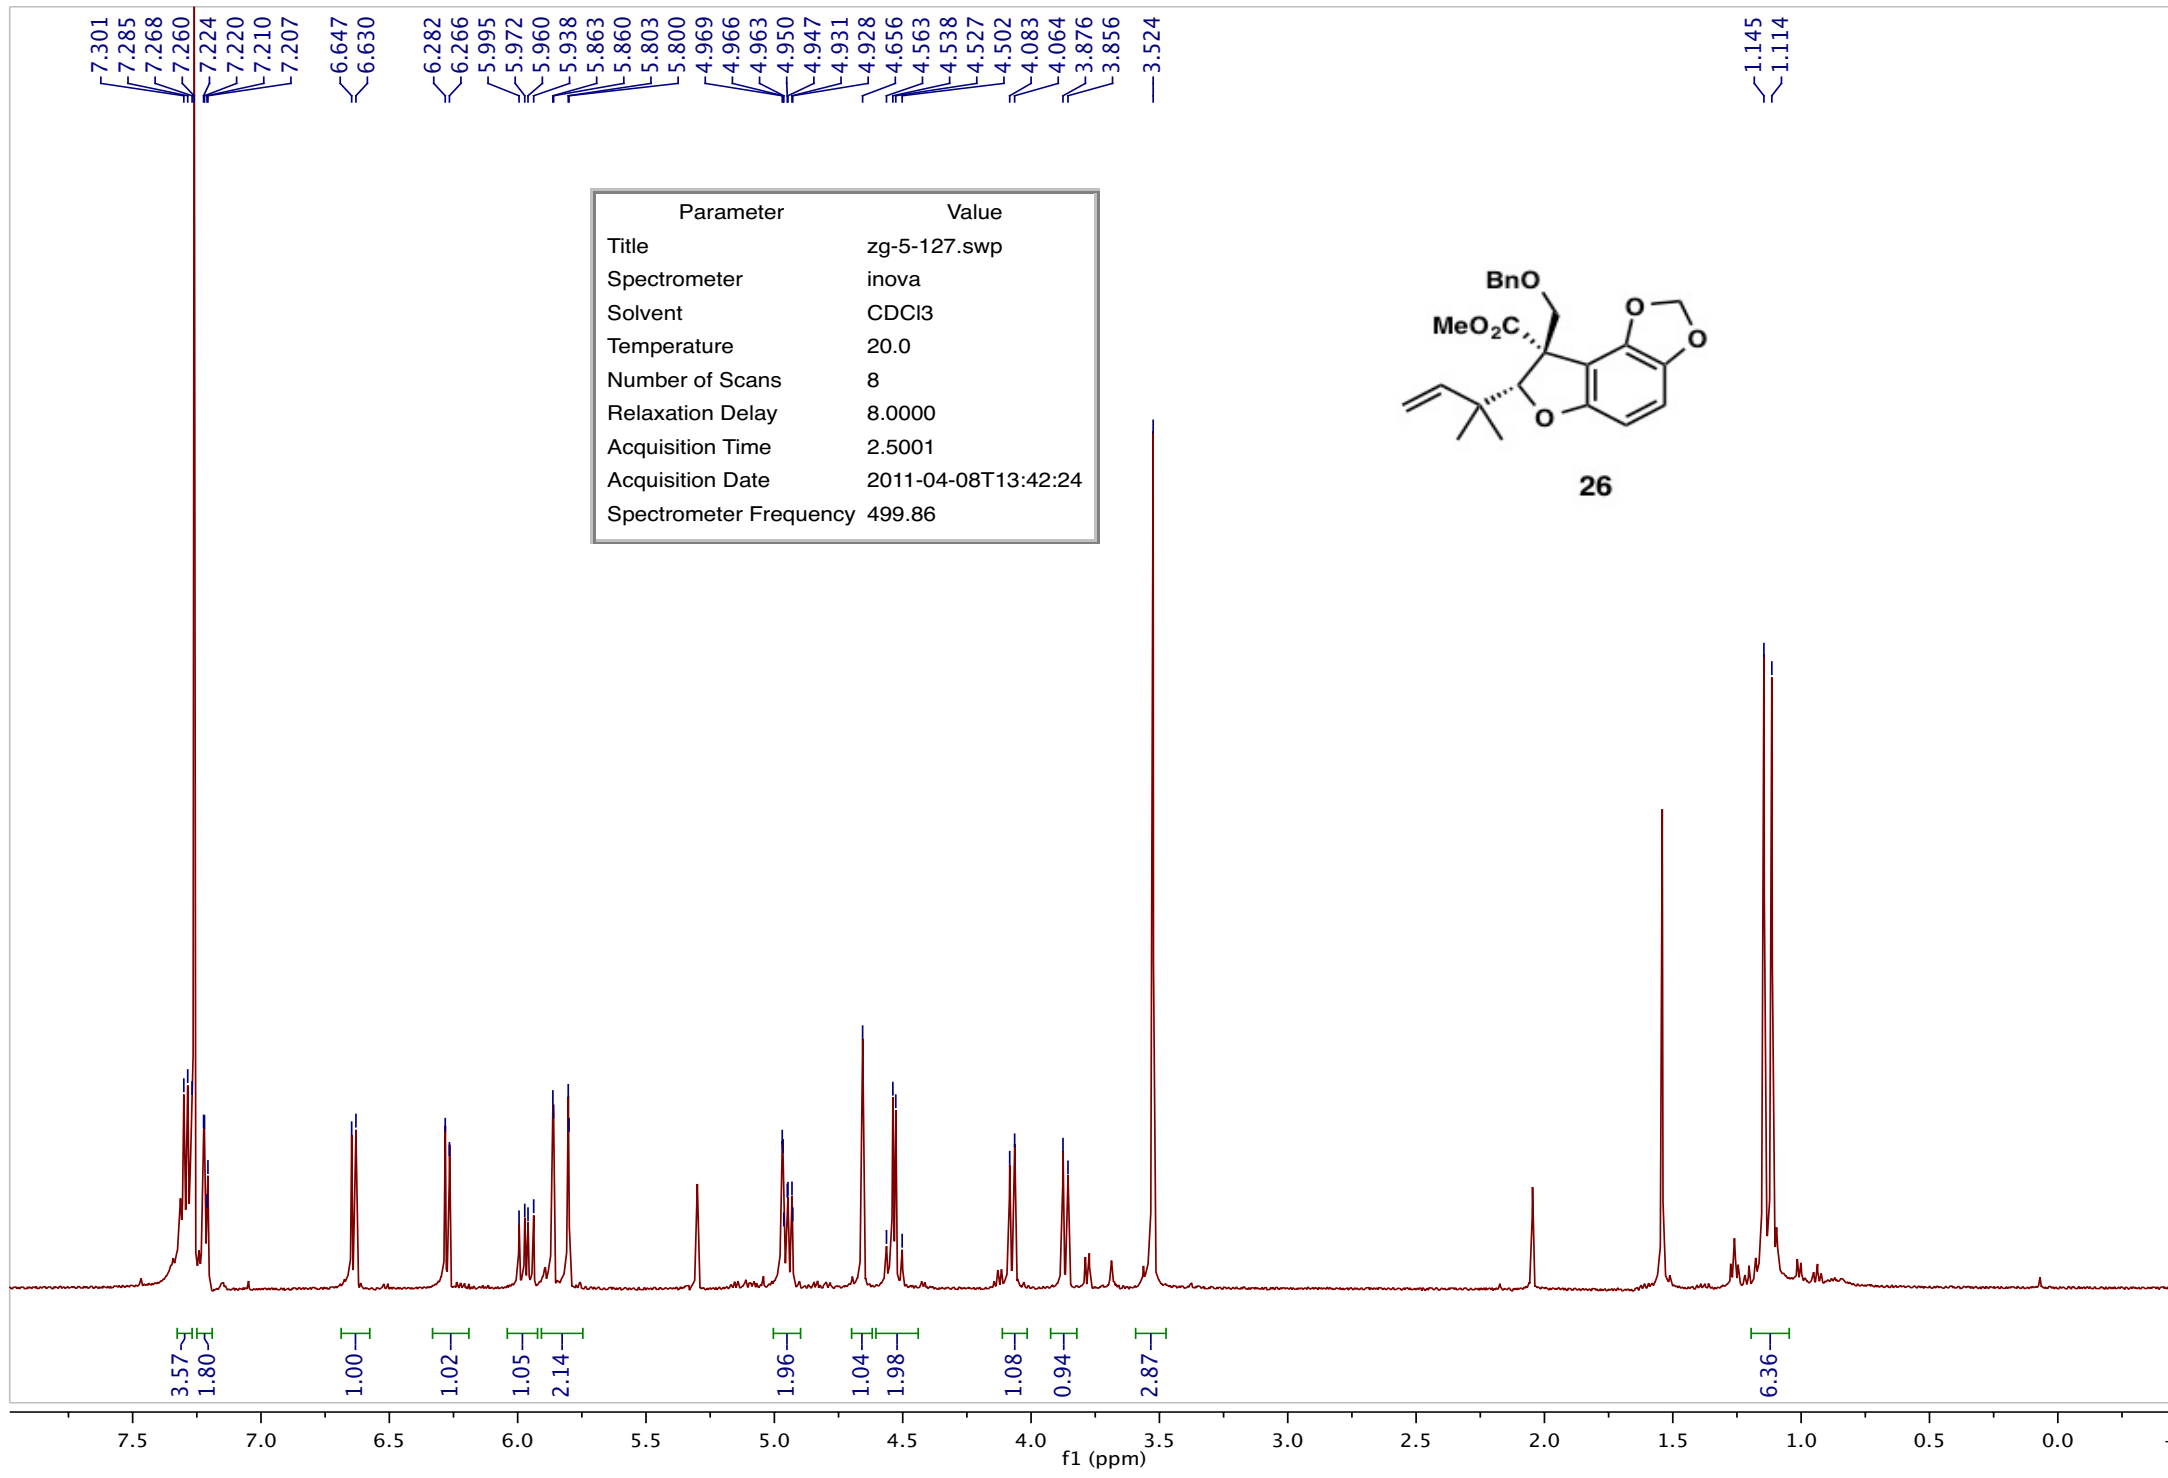

| Parameter              | Value               |
|------------------------|---------------------|
| Title                  | zg-5-127.swp        |
| Spectrometer           | inova               |
| Solvent                | CDCl <sub>3</sub>   |
| Temperature            | 20.0                |
| Number of Scans        | 8                   |
| Relaxation Delay       | 8.0000              |
| Acquisition Time       | 2.5001              |
| Acquisition Date       | 2011-04-08T13:42:24 |
| Spectrometer Frequency | 499.86              |

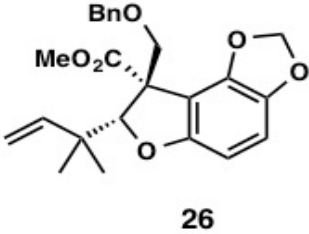

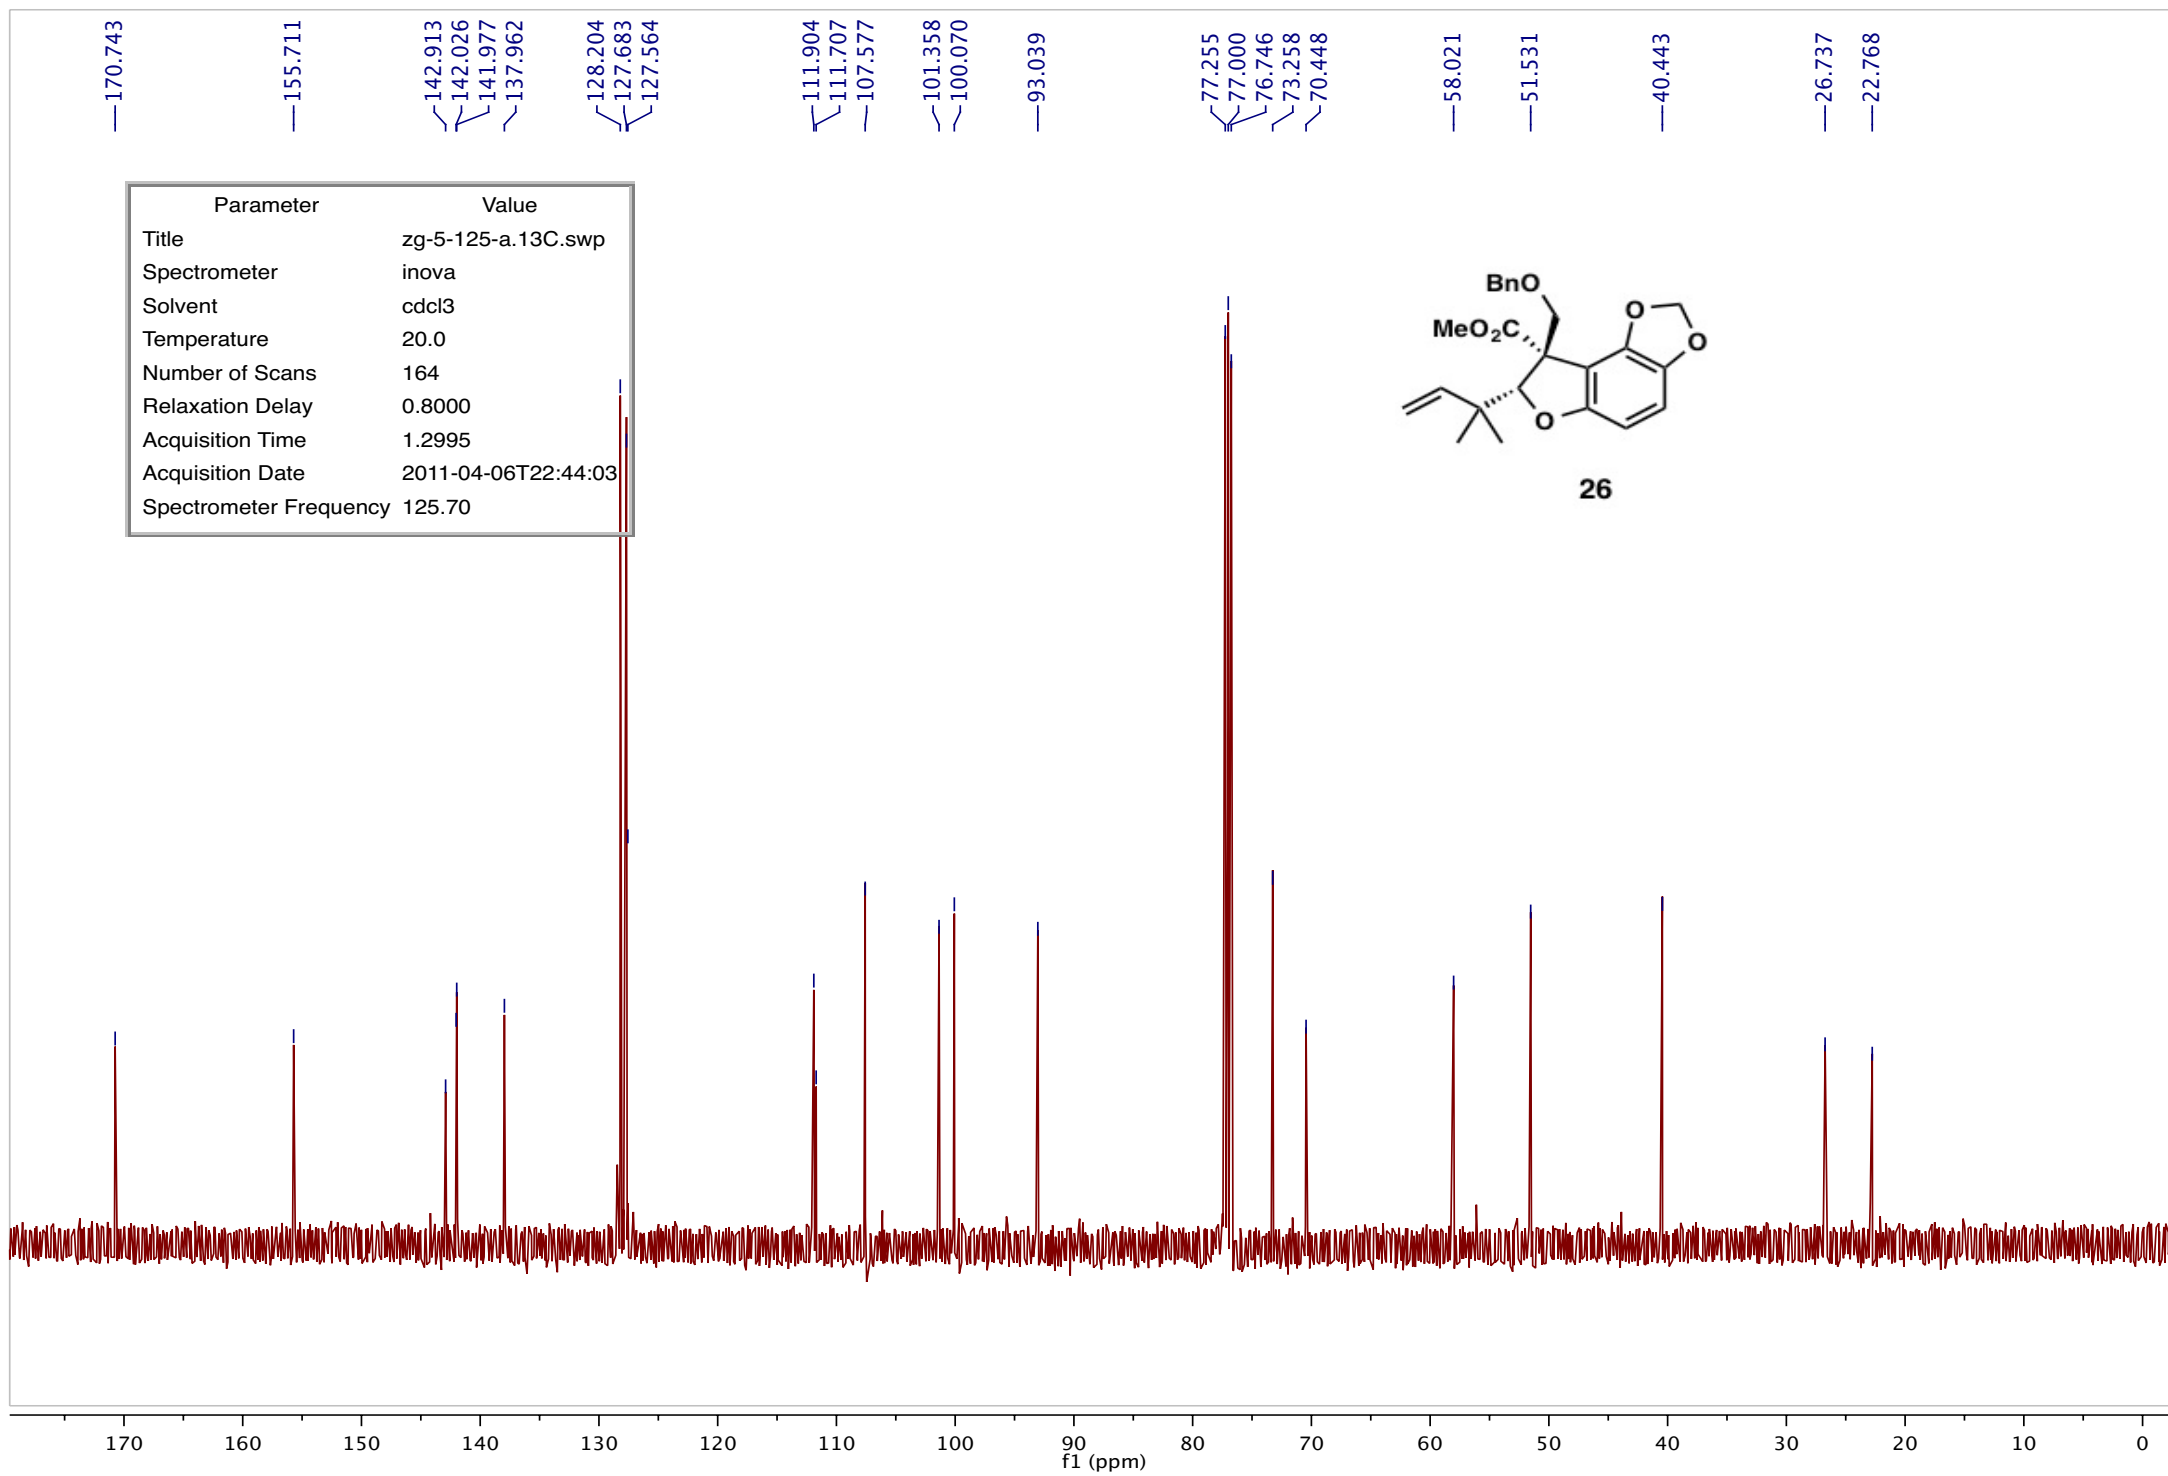



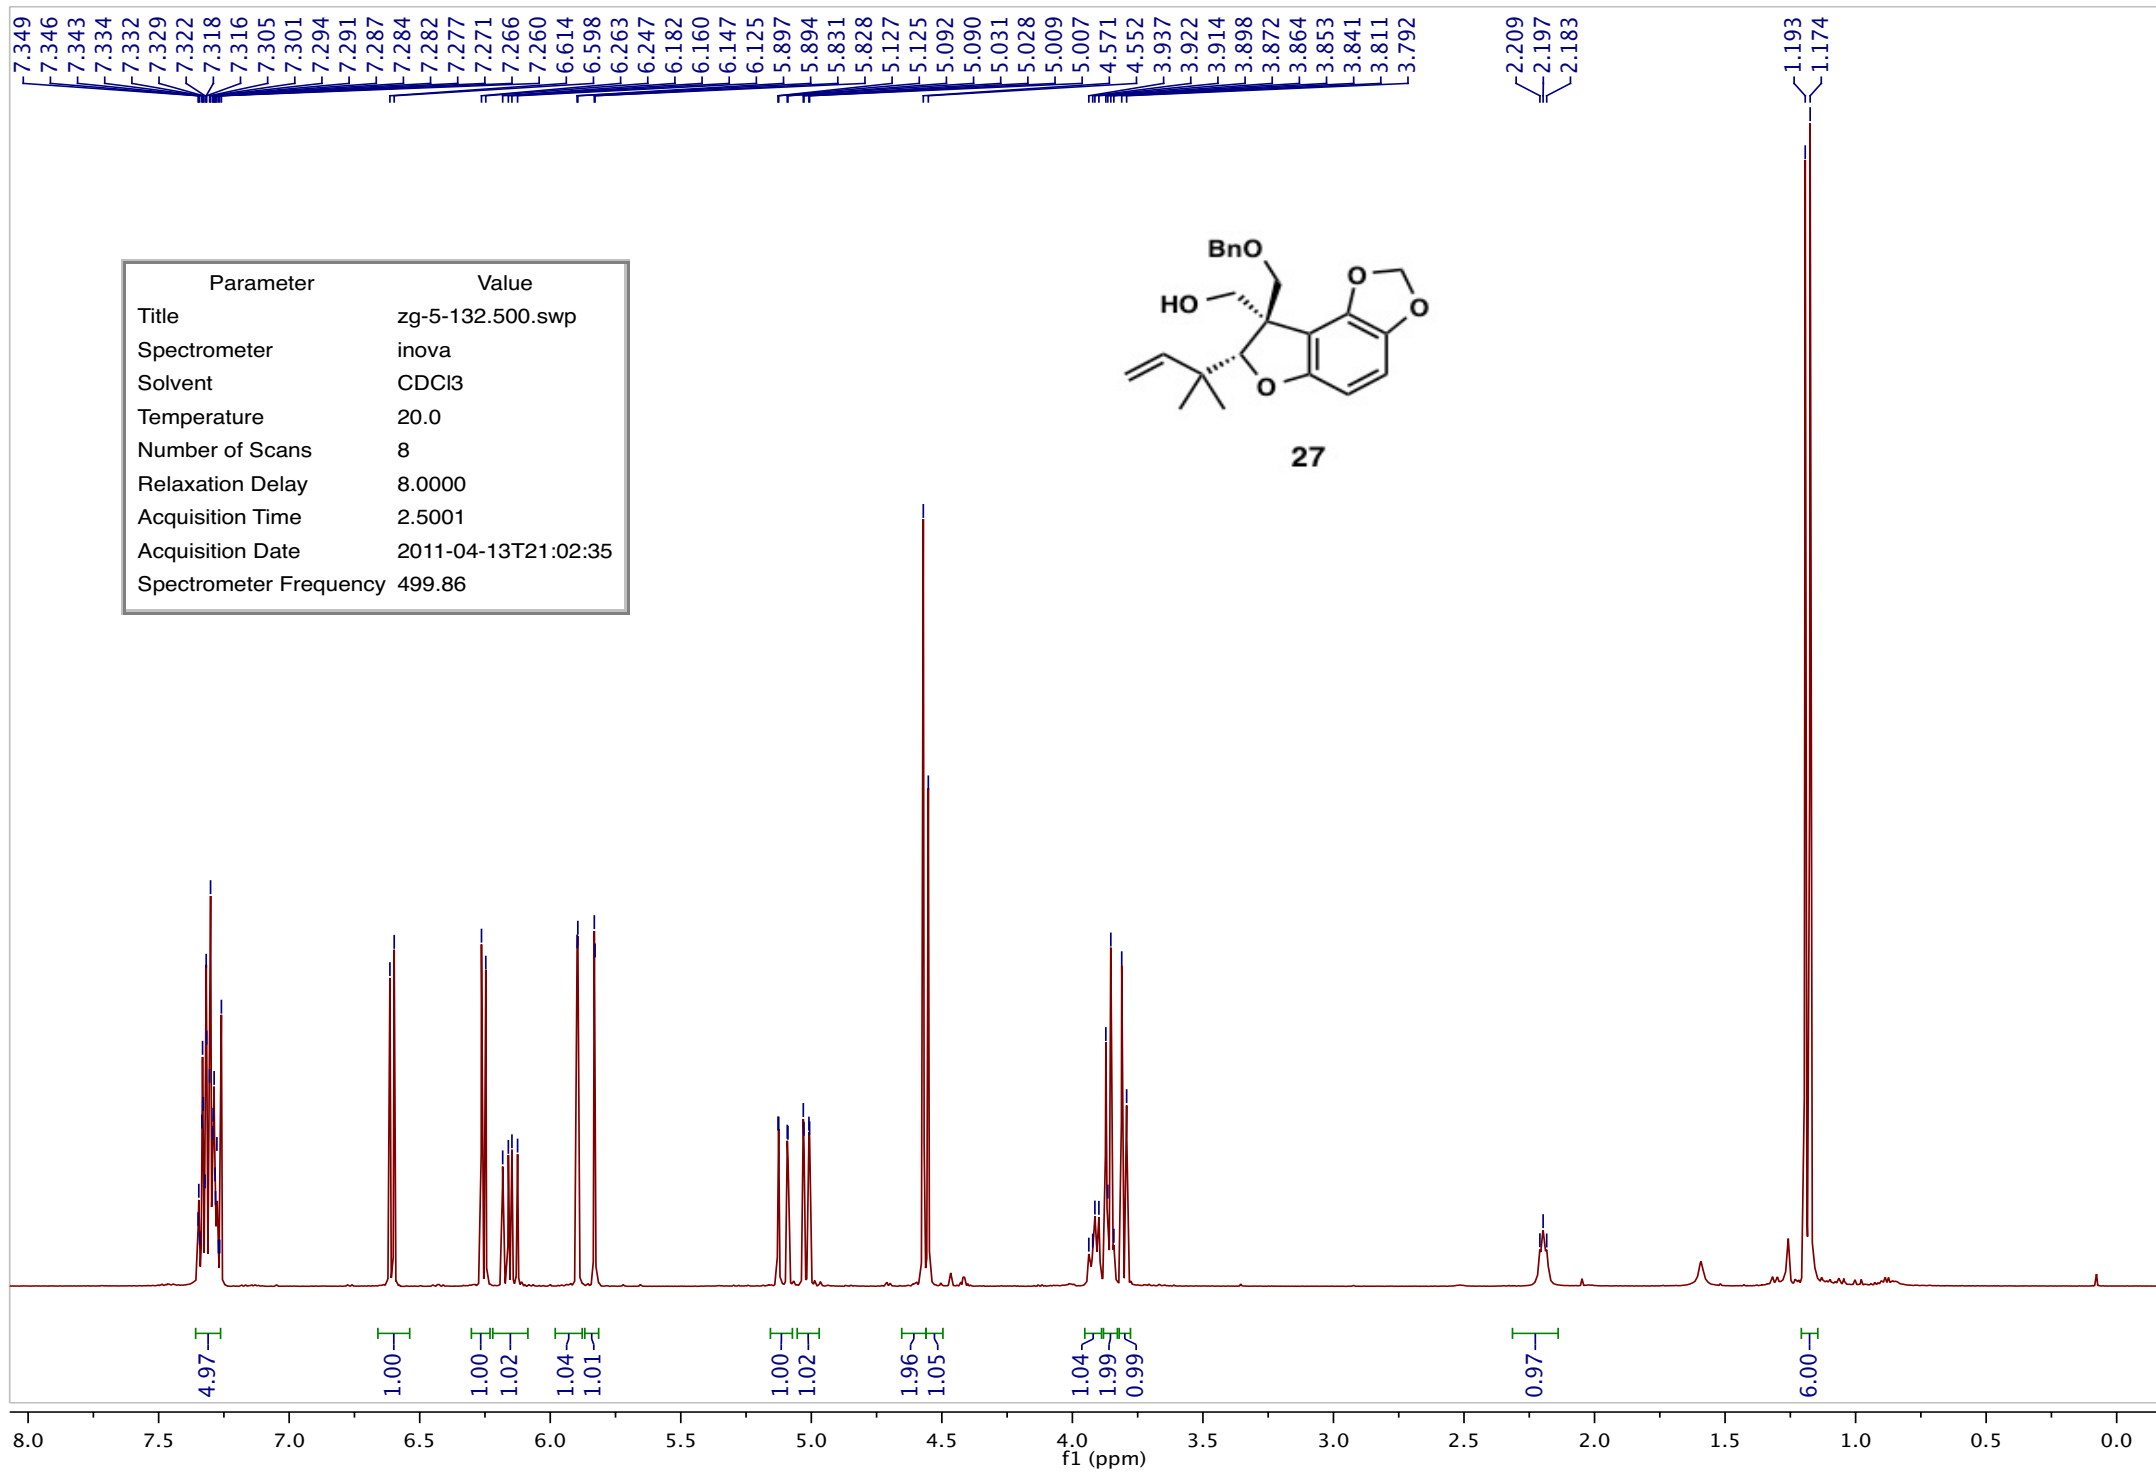

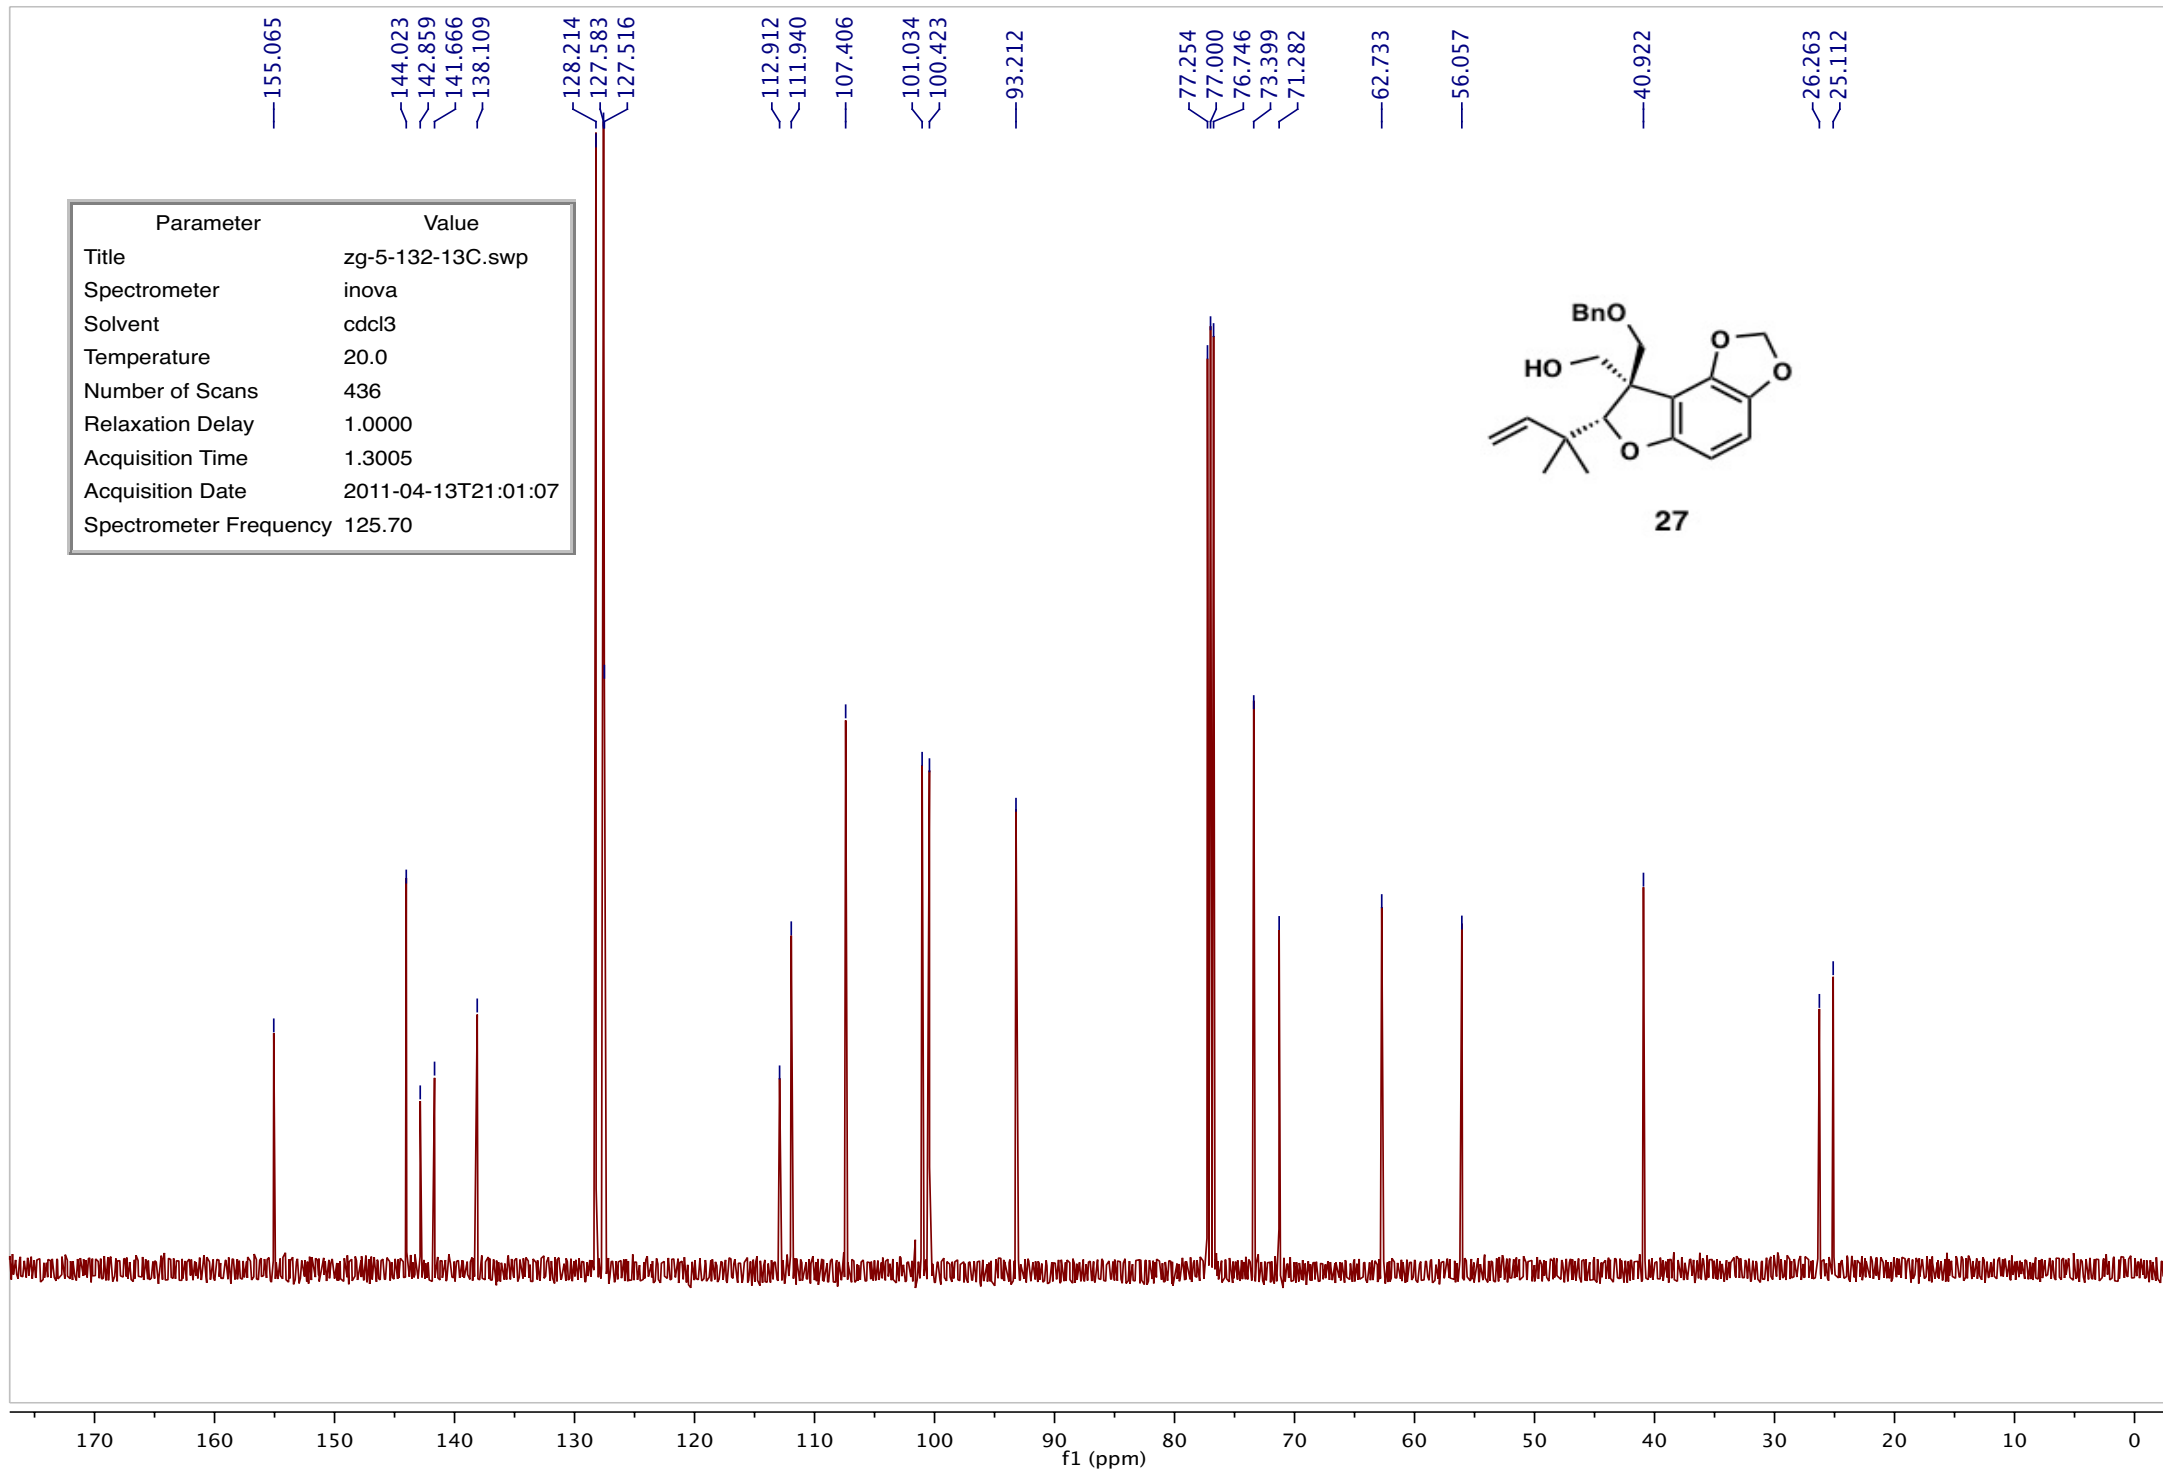

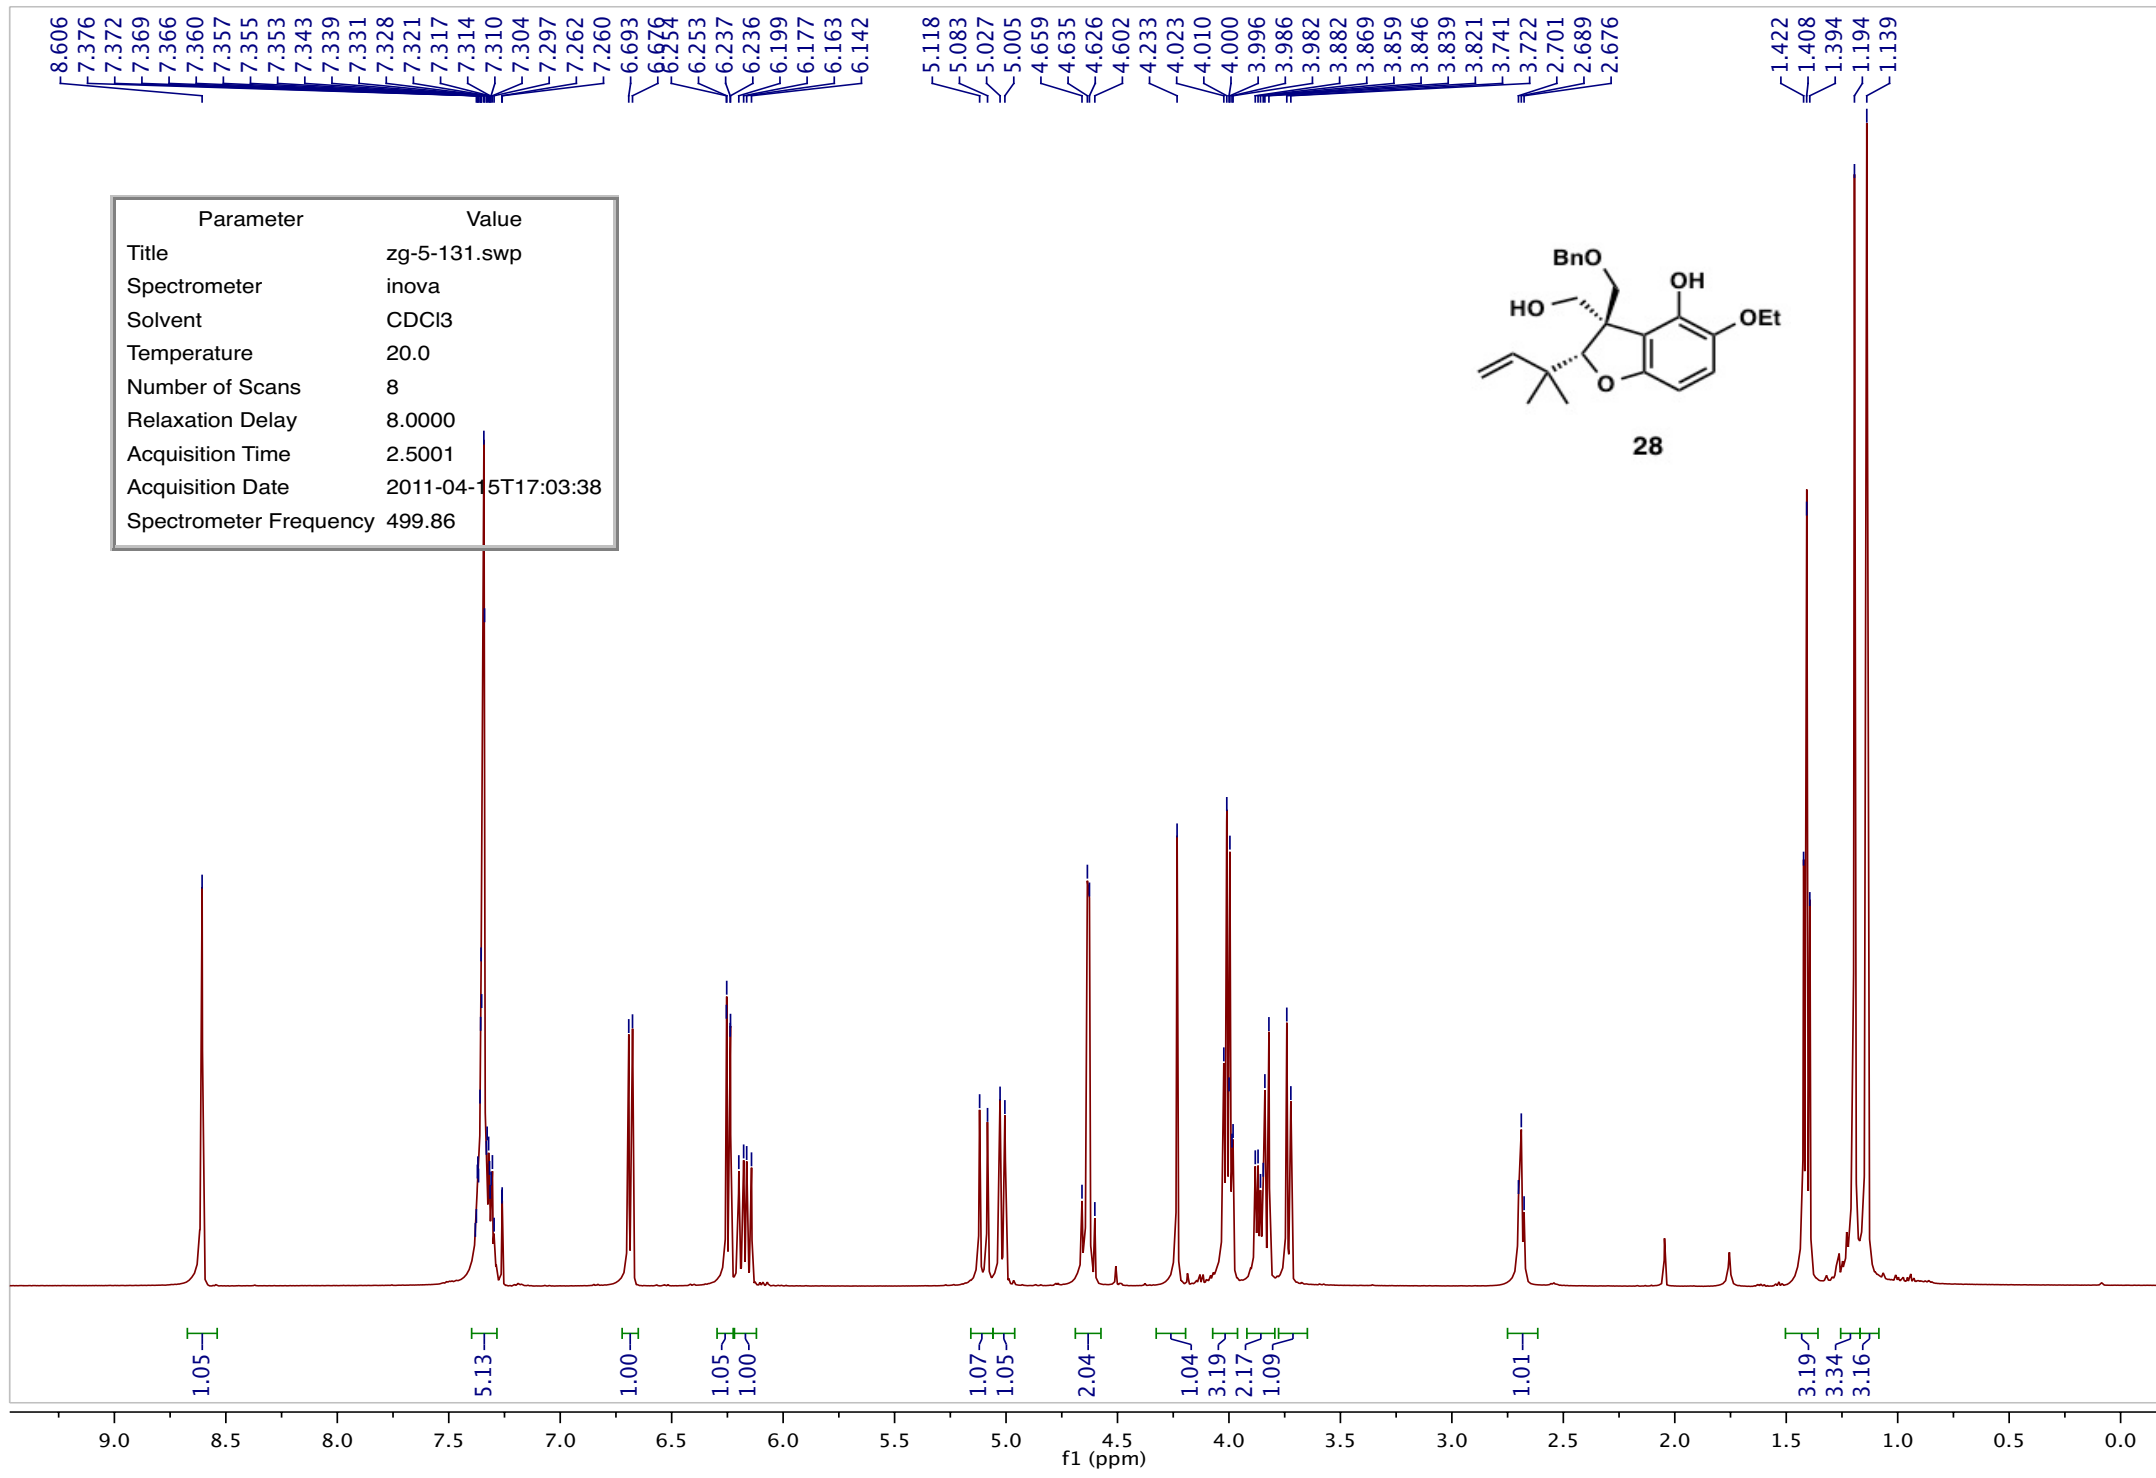

| Parameter              | Value               |
|------------------------|---------------------|
| Title                  | zg-5-131.swp        |
| Spectrometer           | inova               |
| Solvent                | CDCl3               |
| Temperature            | 20.0                |
| Number of Scans        | 8                   |
| Relaxation Delay       | 8.0000              |
| Acquisition Time       | 2.5001              |
| Acquisition Date       | 2011-04-15T17:03:38 |
| Spectrometer Frequency | 499.86              |

| Parameter              | Value               |
|------------------------|---------------------|
| Title                  | zg-5-131-13C.swp    |
| Spectrometer           | inova               |
| Solvent                | cdcl3               |
| Temperature            | 20.0                |
| Number of Scans        | 220                 |
| Relaxation Delay       | 1.0000              |
| Acquisition Time       | 1.3005              |
| Acquisition Date       | 2011-04-15T17:02:05 |
| Spectrometer Frequency | 125.70              |

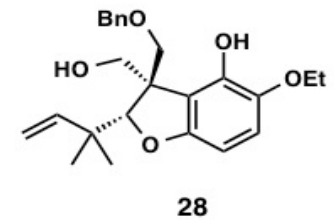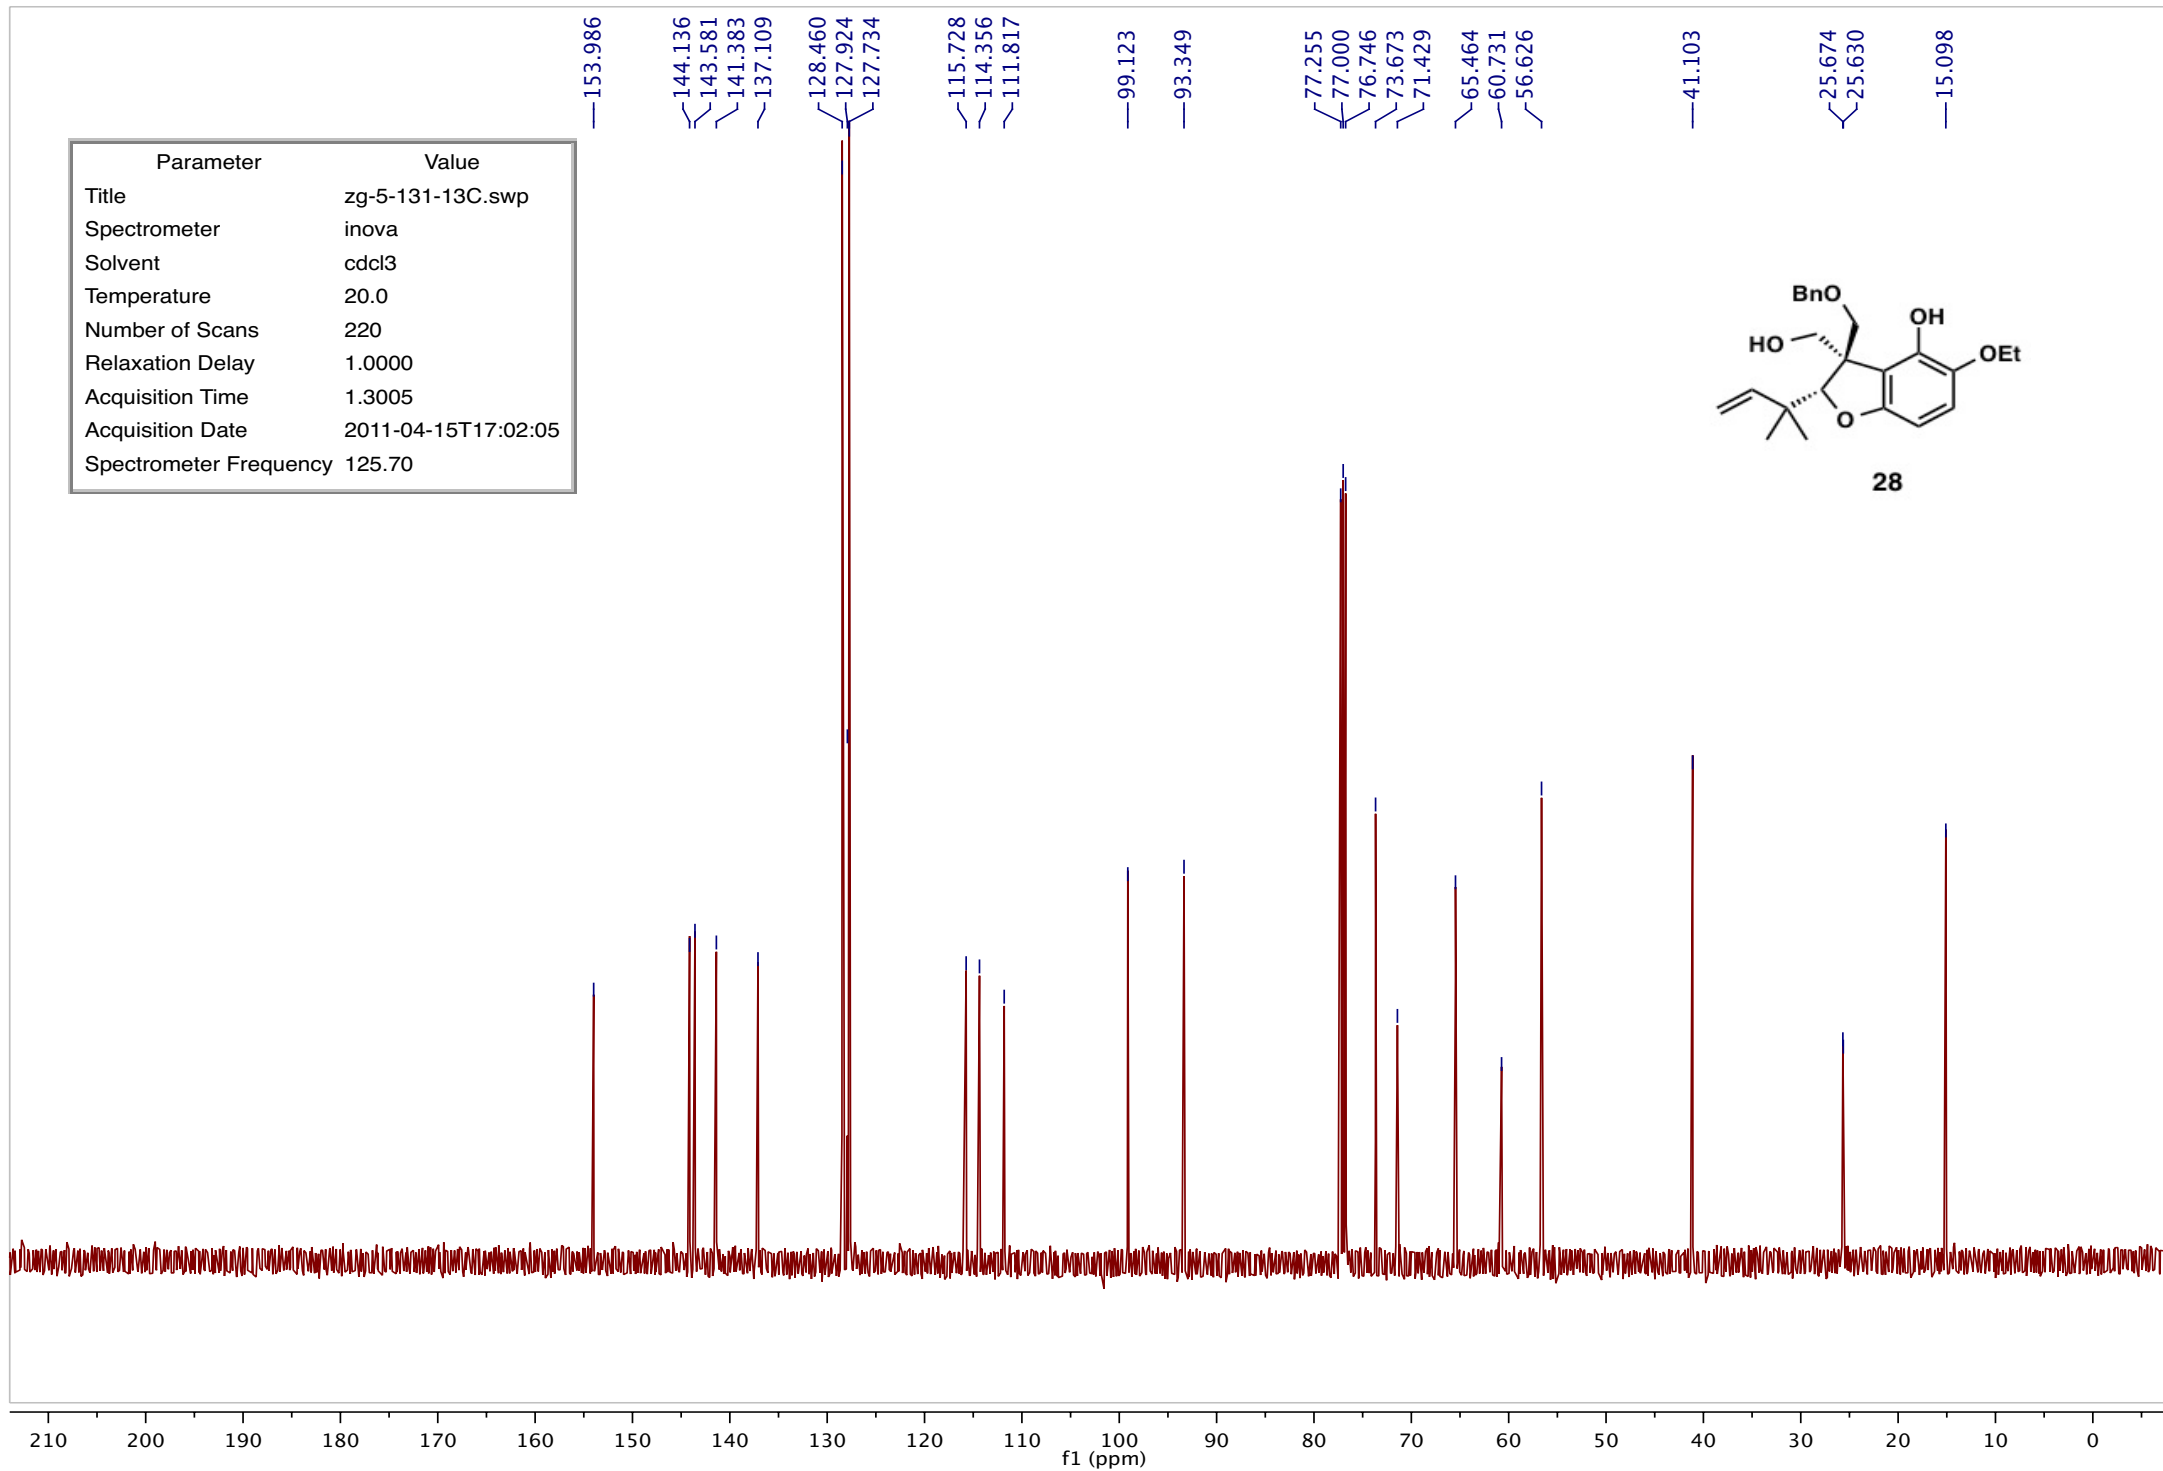

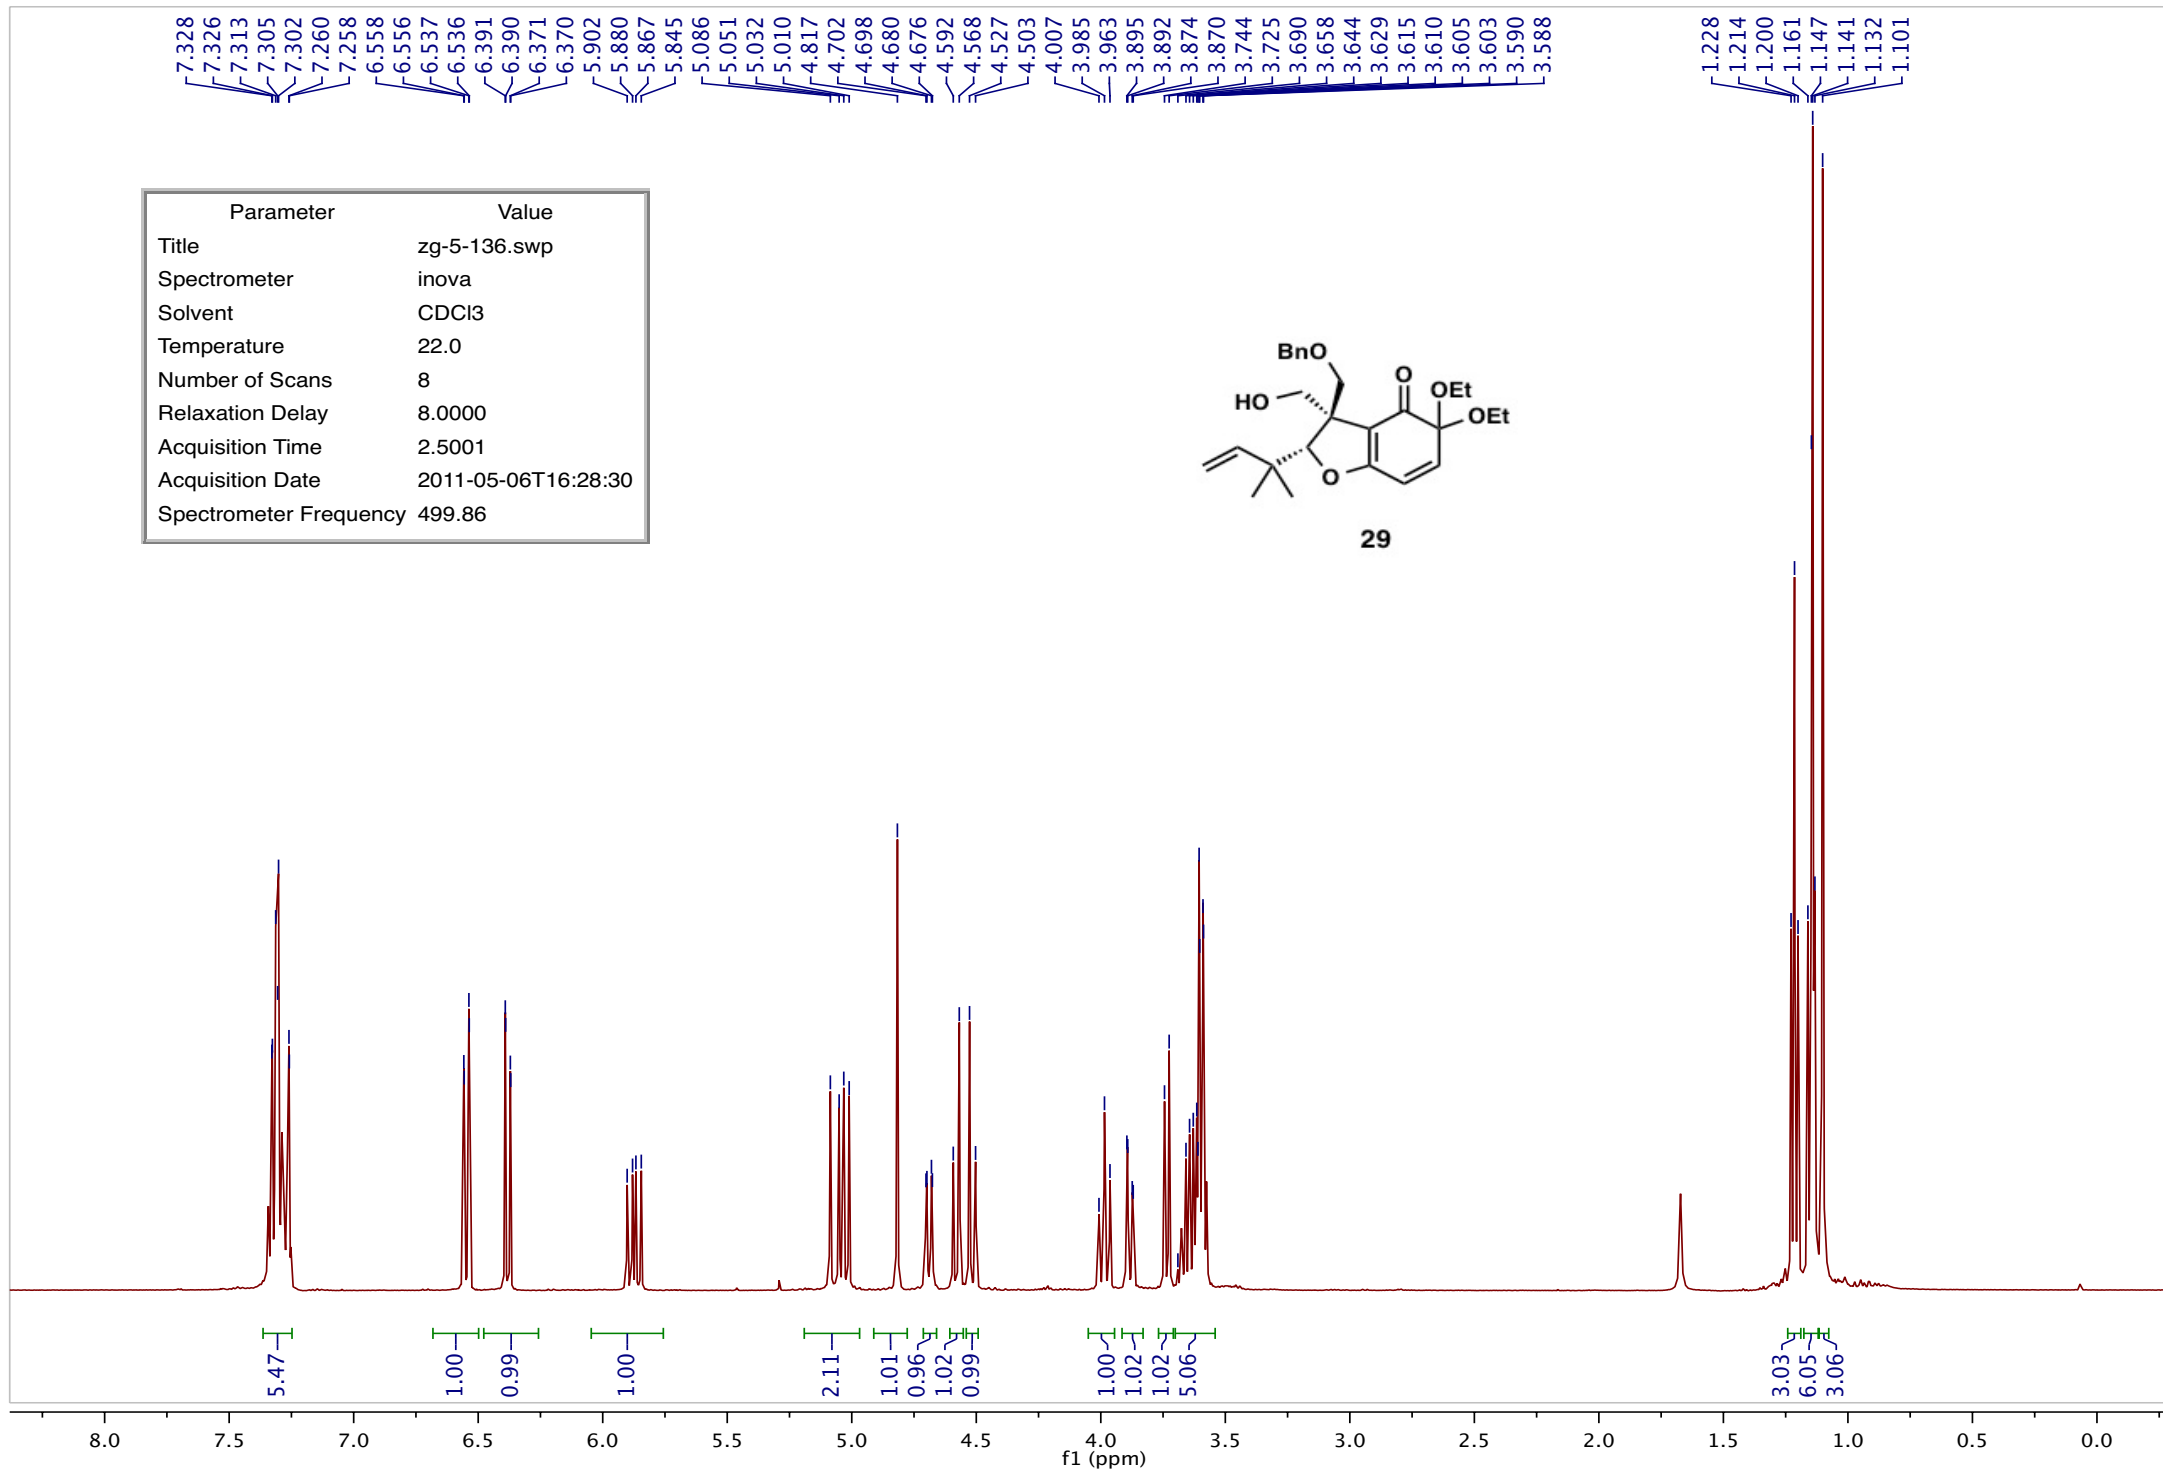

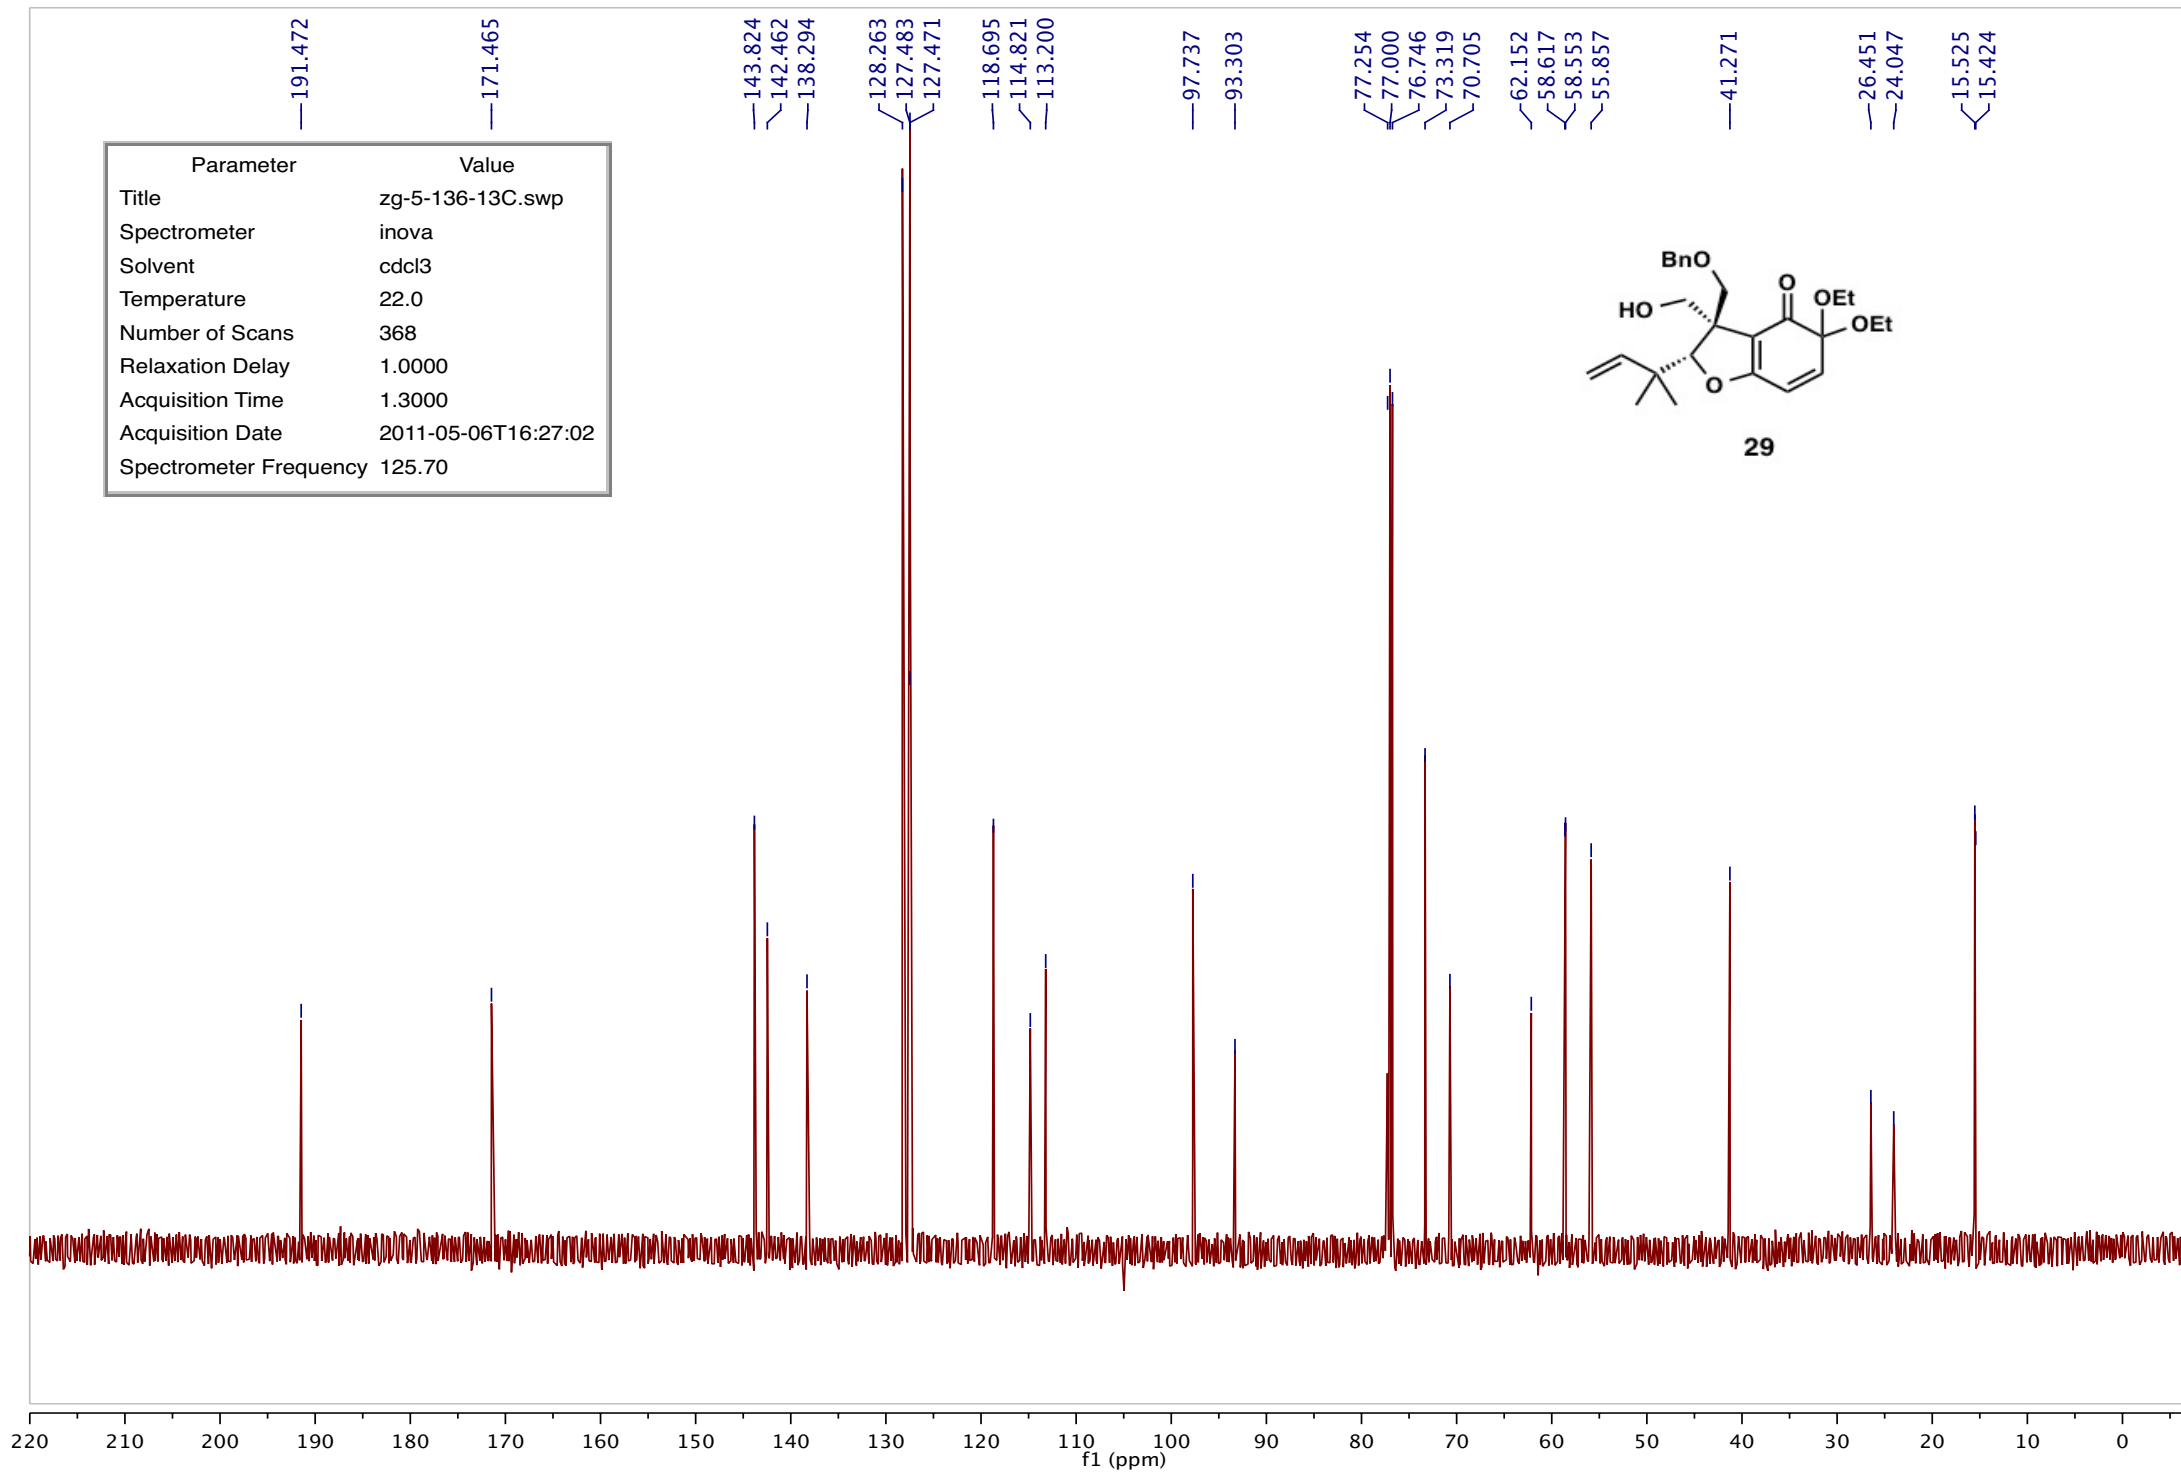

7.169  
7.140  
7.059  
7.046

6.356  
6.334  
6.320  
6.299

5.670  
5.663  
5.657

4.971  
4.935  
4.850  
4.829

4.535  
4.523  
4.314  
4.312  
4.170

4.146  
4.135  
4.111

3.823  
3.814  
3.800  
3.791

3.594  
3.576  
3.520  
3.506  
3.426

3.408  
3.302  
3.287  
3.282

2.500  
2.490  
2.480  
2.470

2.384  
2.374  
2.364  
2.185

2.179  
2.147  
2.141  
2.015

2.002  
1.989  
1.946  
1.939

1.936  
1.540  
1.520  
1.318

1.139  
0.994  
0.980  
0.966  
0.951  
0.936  
0.927

| Parameter              | Value               |
|------------------------|---------------------|
| Title                  | zg-5-137.swp        |
| Spectrometer           | inova               |
| Solvent                | c6d6                |
| Temperature            | 20.0                |
| Number of Scans        | 8                   |
| Relaxation Delay       | 8.0000              |
| Acquisition Time       | 2.5001              |
| Acquisition Date       | 2011-04-16T13:12:56 |
| Spectrometer Frequency | 499.86              |

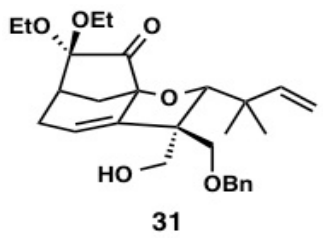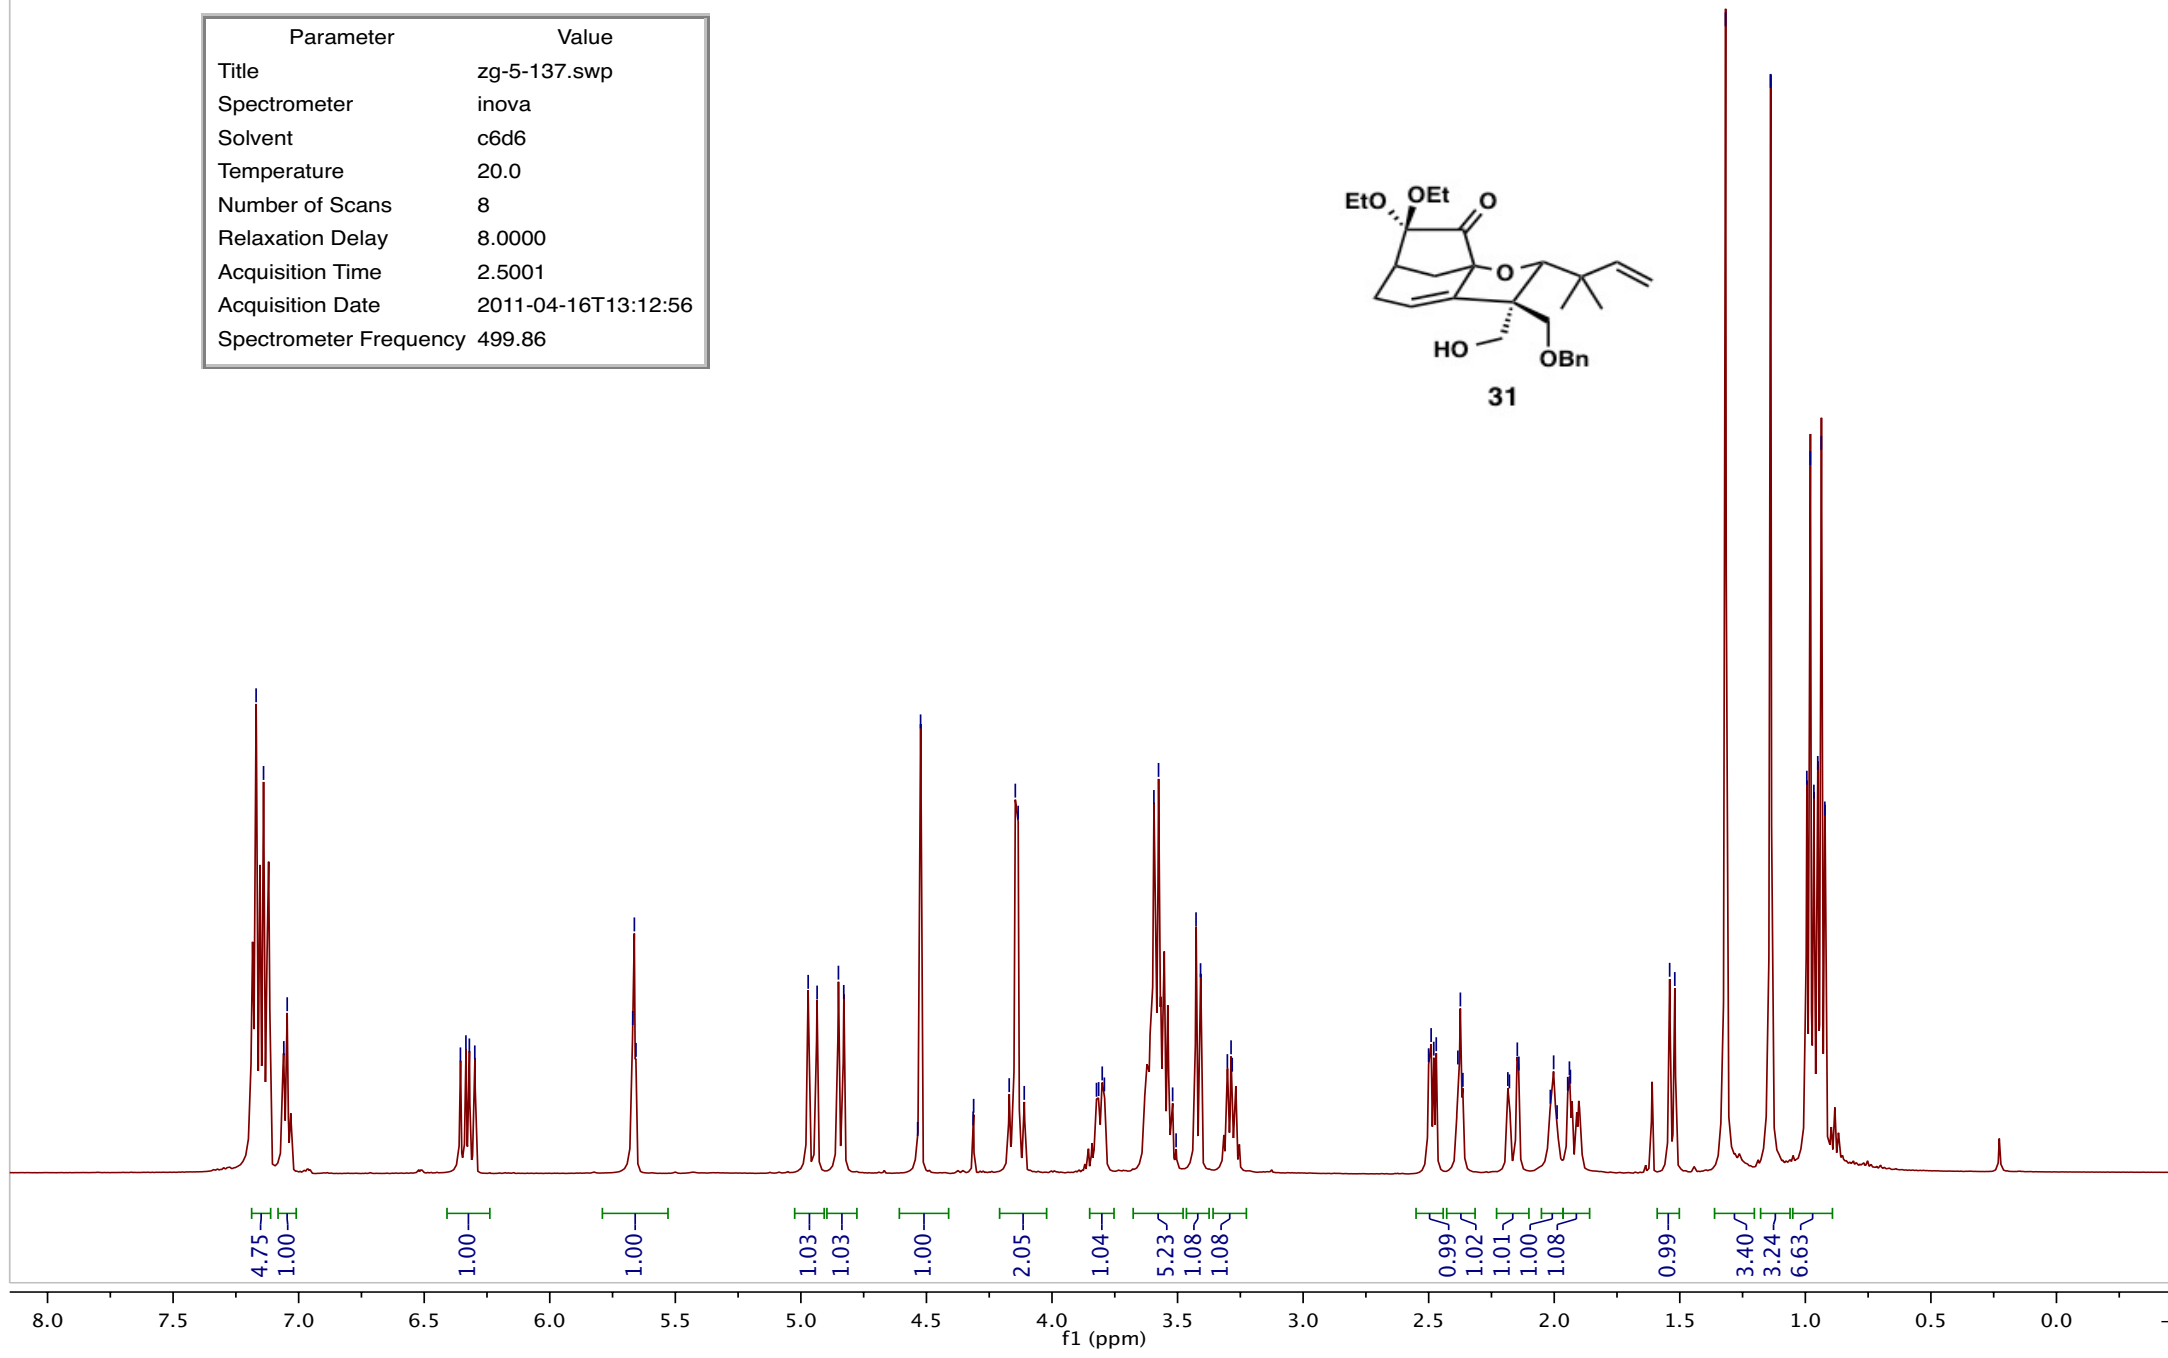

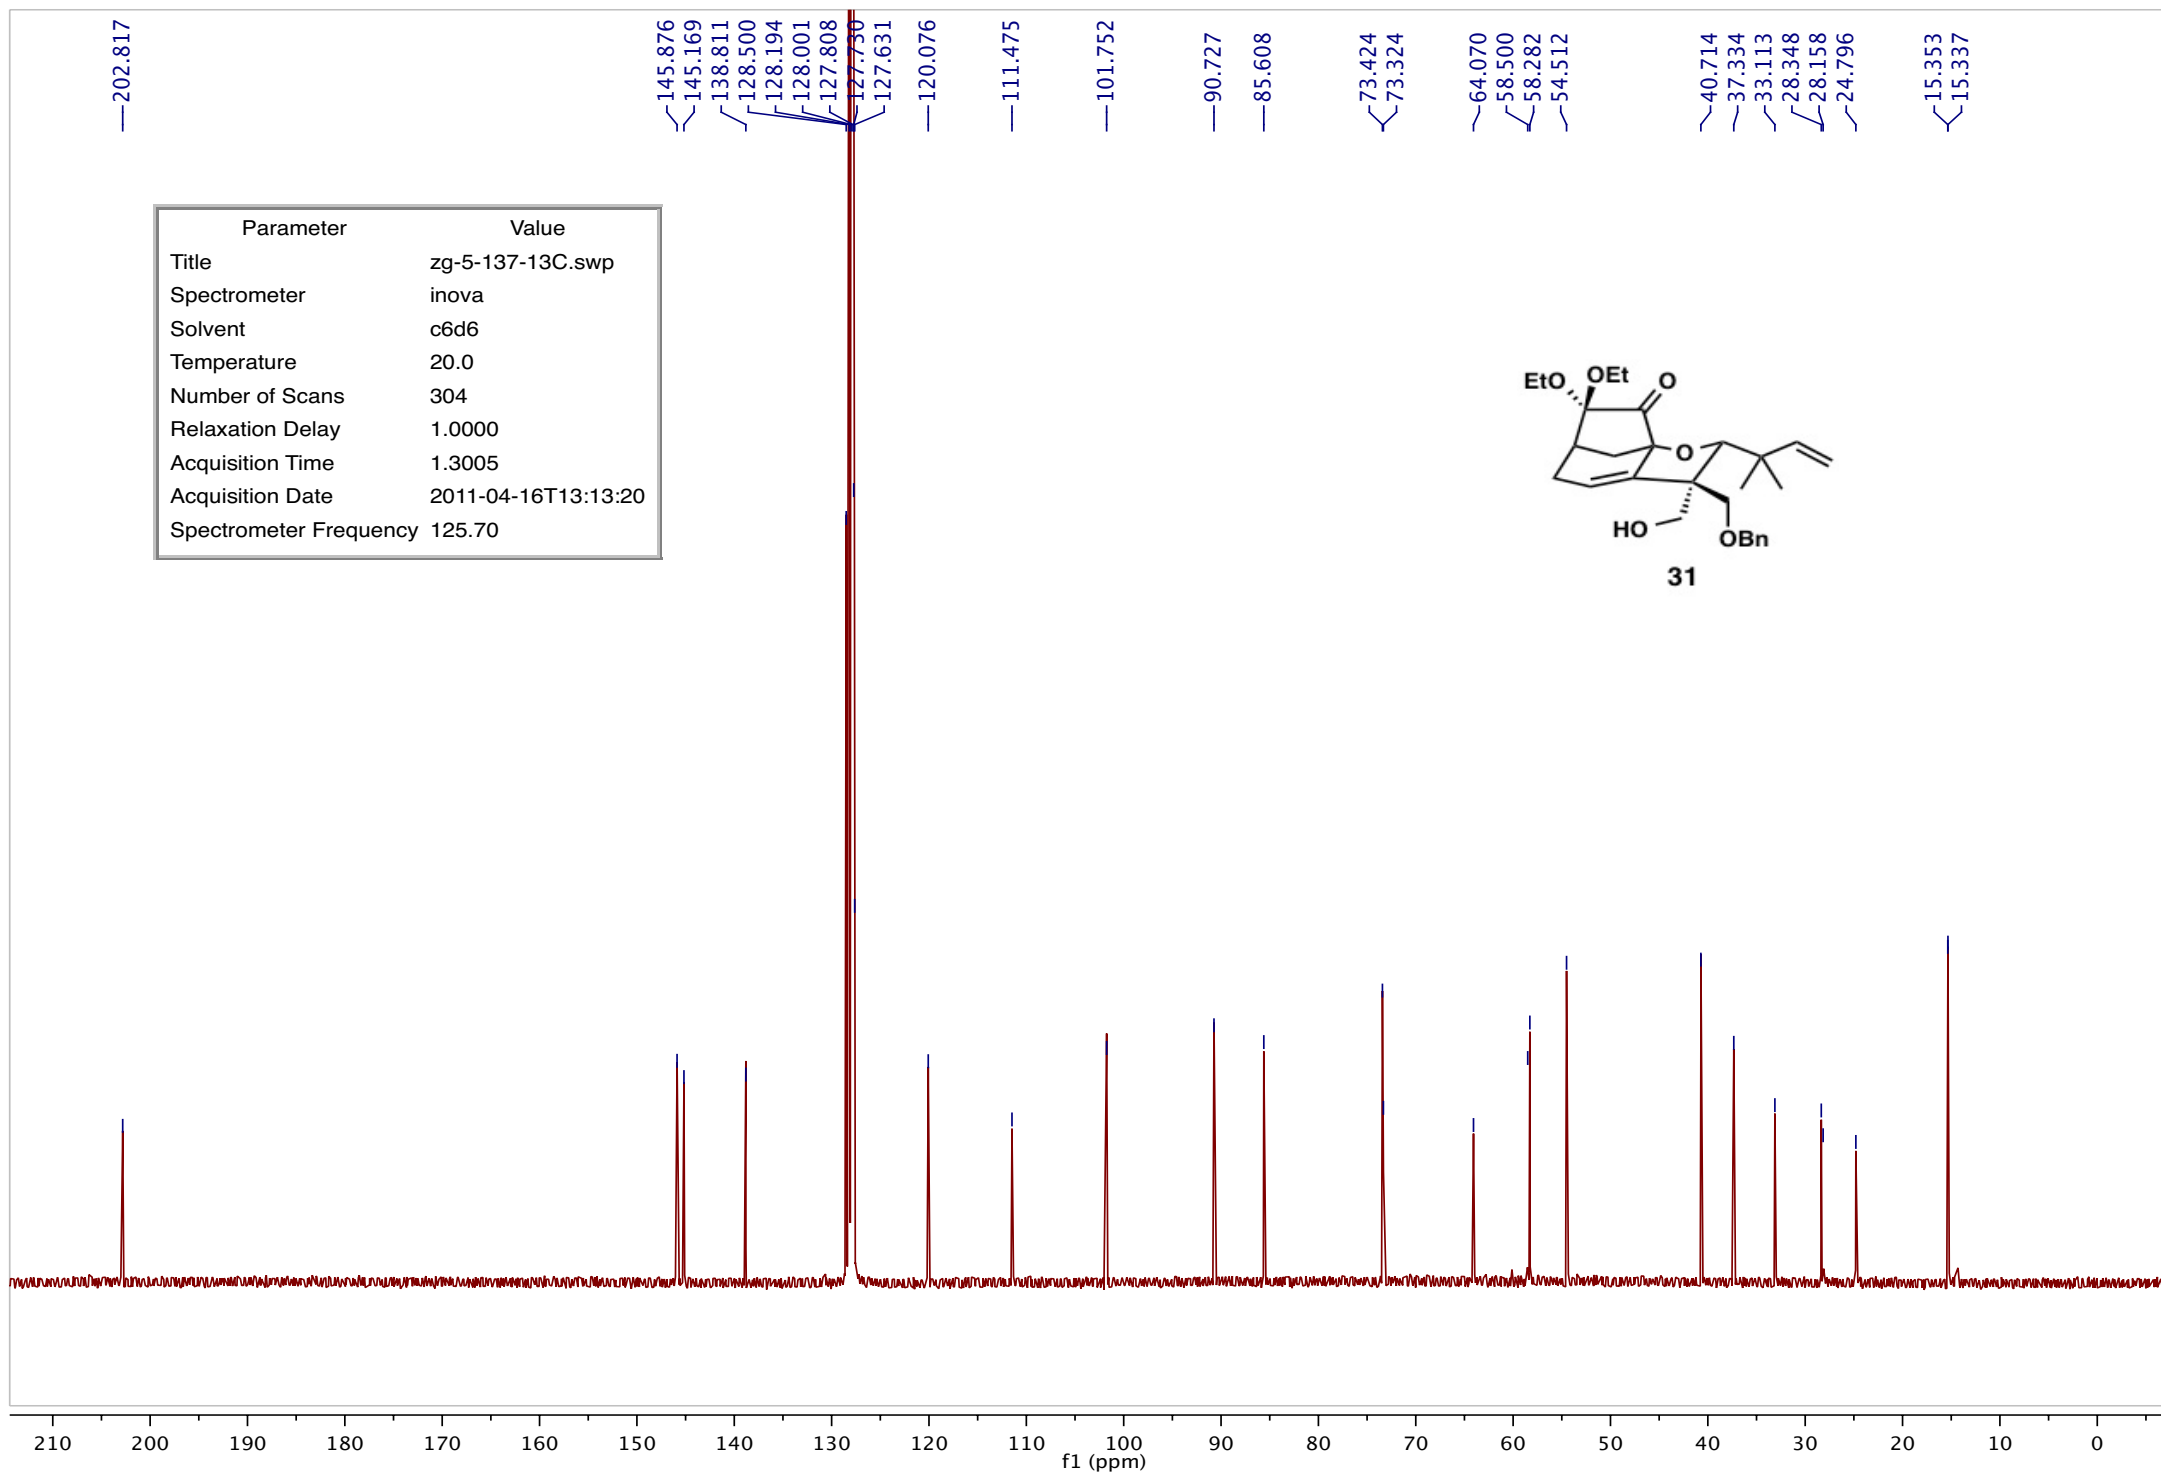



7.984  
 7.282 7.278 7.270 7.266 7.255 7.223 7.218 7.206 7.035  
 6.117 6.095 6.082 6.060  
 5.648 5.641 5.634  
 4.987 4.952 4.876 4.855 4.572 4.550 4.434 4.381 4.360 4.345  
 3.693 3.679 3.643 3.629 3.593 3.587 3.579 3.574 3.569 3.560 3.560 3.547 3.533 3.527 3.420 3.402 2.659 2.650 2.640 2.640 2.466 2.456 2.445 2.445 2.435 2.298 2.295 2.291 2.291 2.288 2.288 2.250 2.250 2.246 2.246 1.617 1.617 1.596 1.596 1.230 1.215 1.215 1.208 1.202 1.176 1.161 1.161 1.147

| Parameter              | Value               |
|------------------------|---------------------|
| Title                  | zg-5-138.swp        |
| Spectrometer           | inova               |
| Solvent                | CDCl3               |
| Temperature            | 20.0                |
| Number of Scans        | 8                   |
| Relaxation Delay       | 8.0000              |
| Acquisition Time       | 2.5001              |
| Acquisition Date       | 2011-04-18T09:54:06 |
| Spectrometer Frequency | 499.86              |

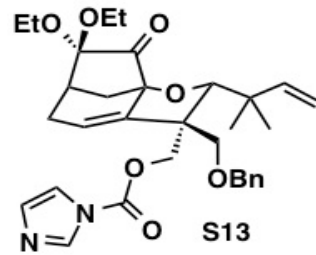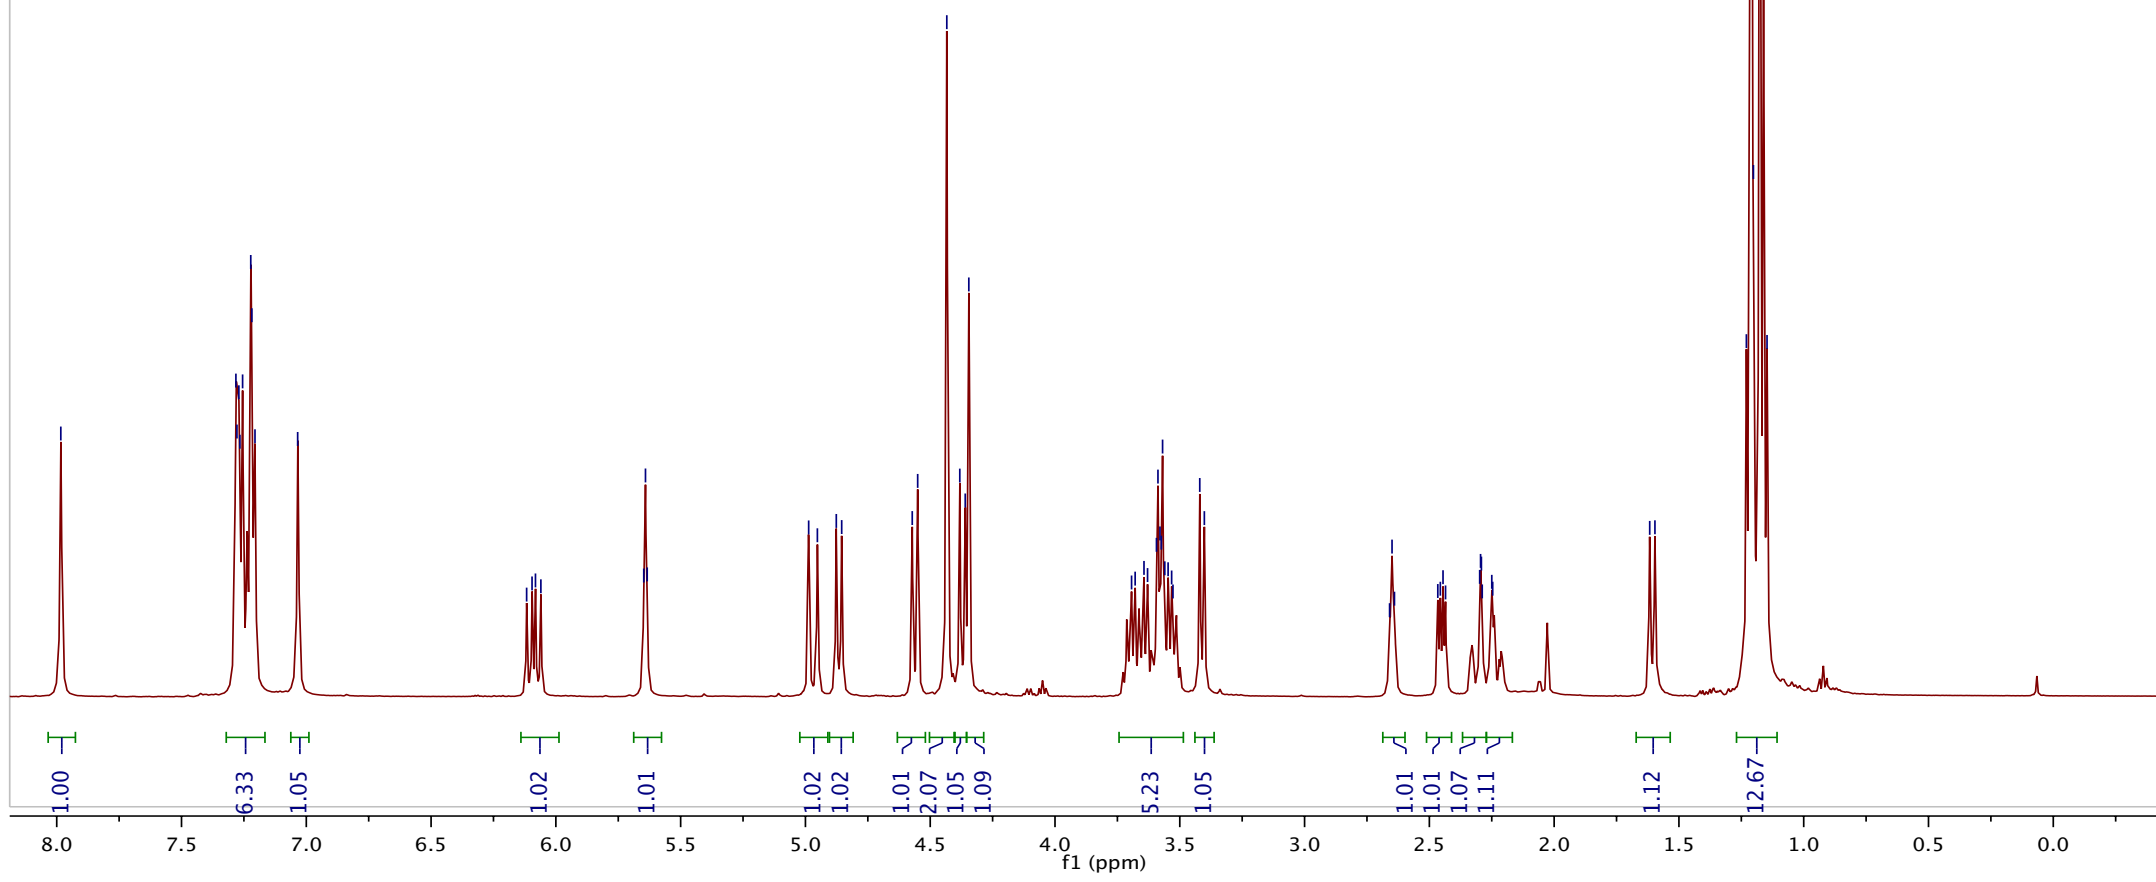

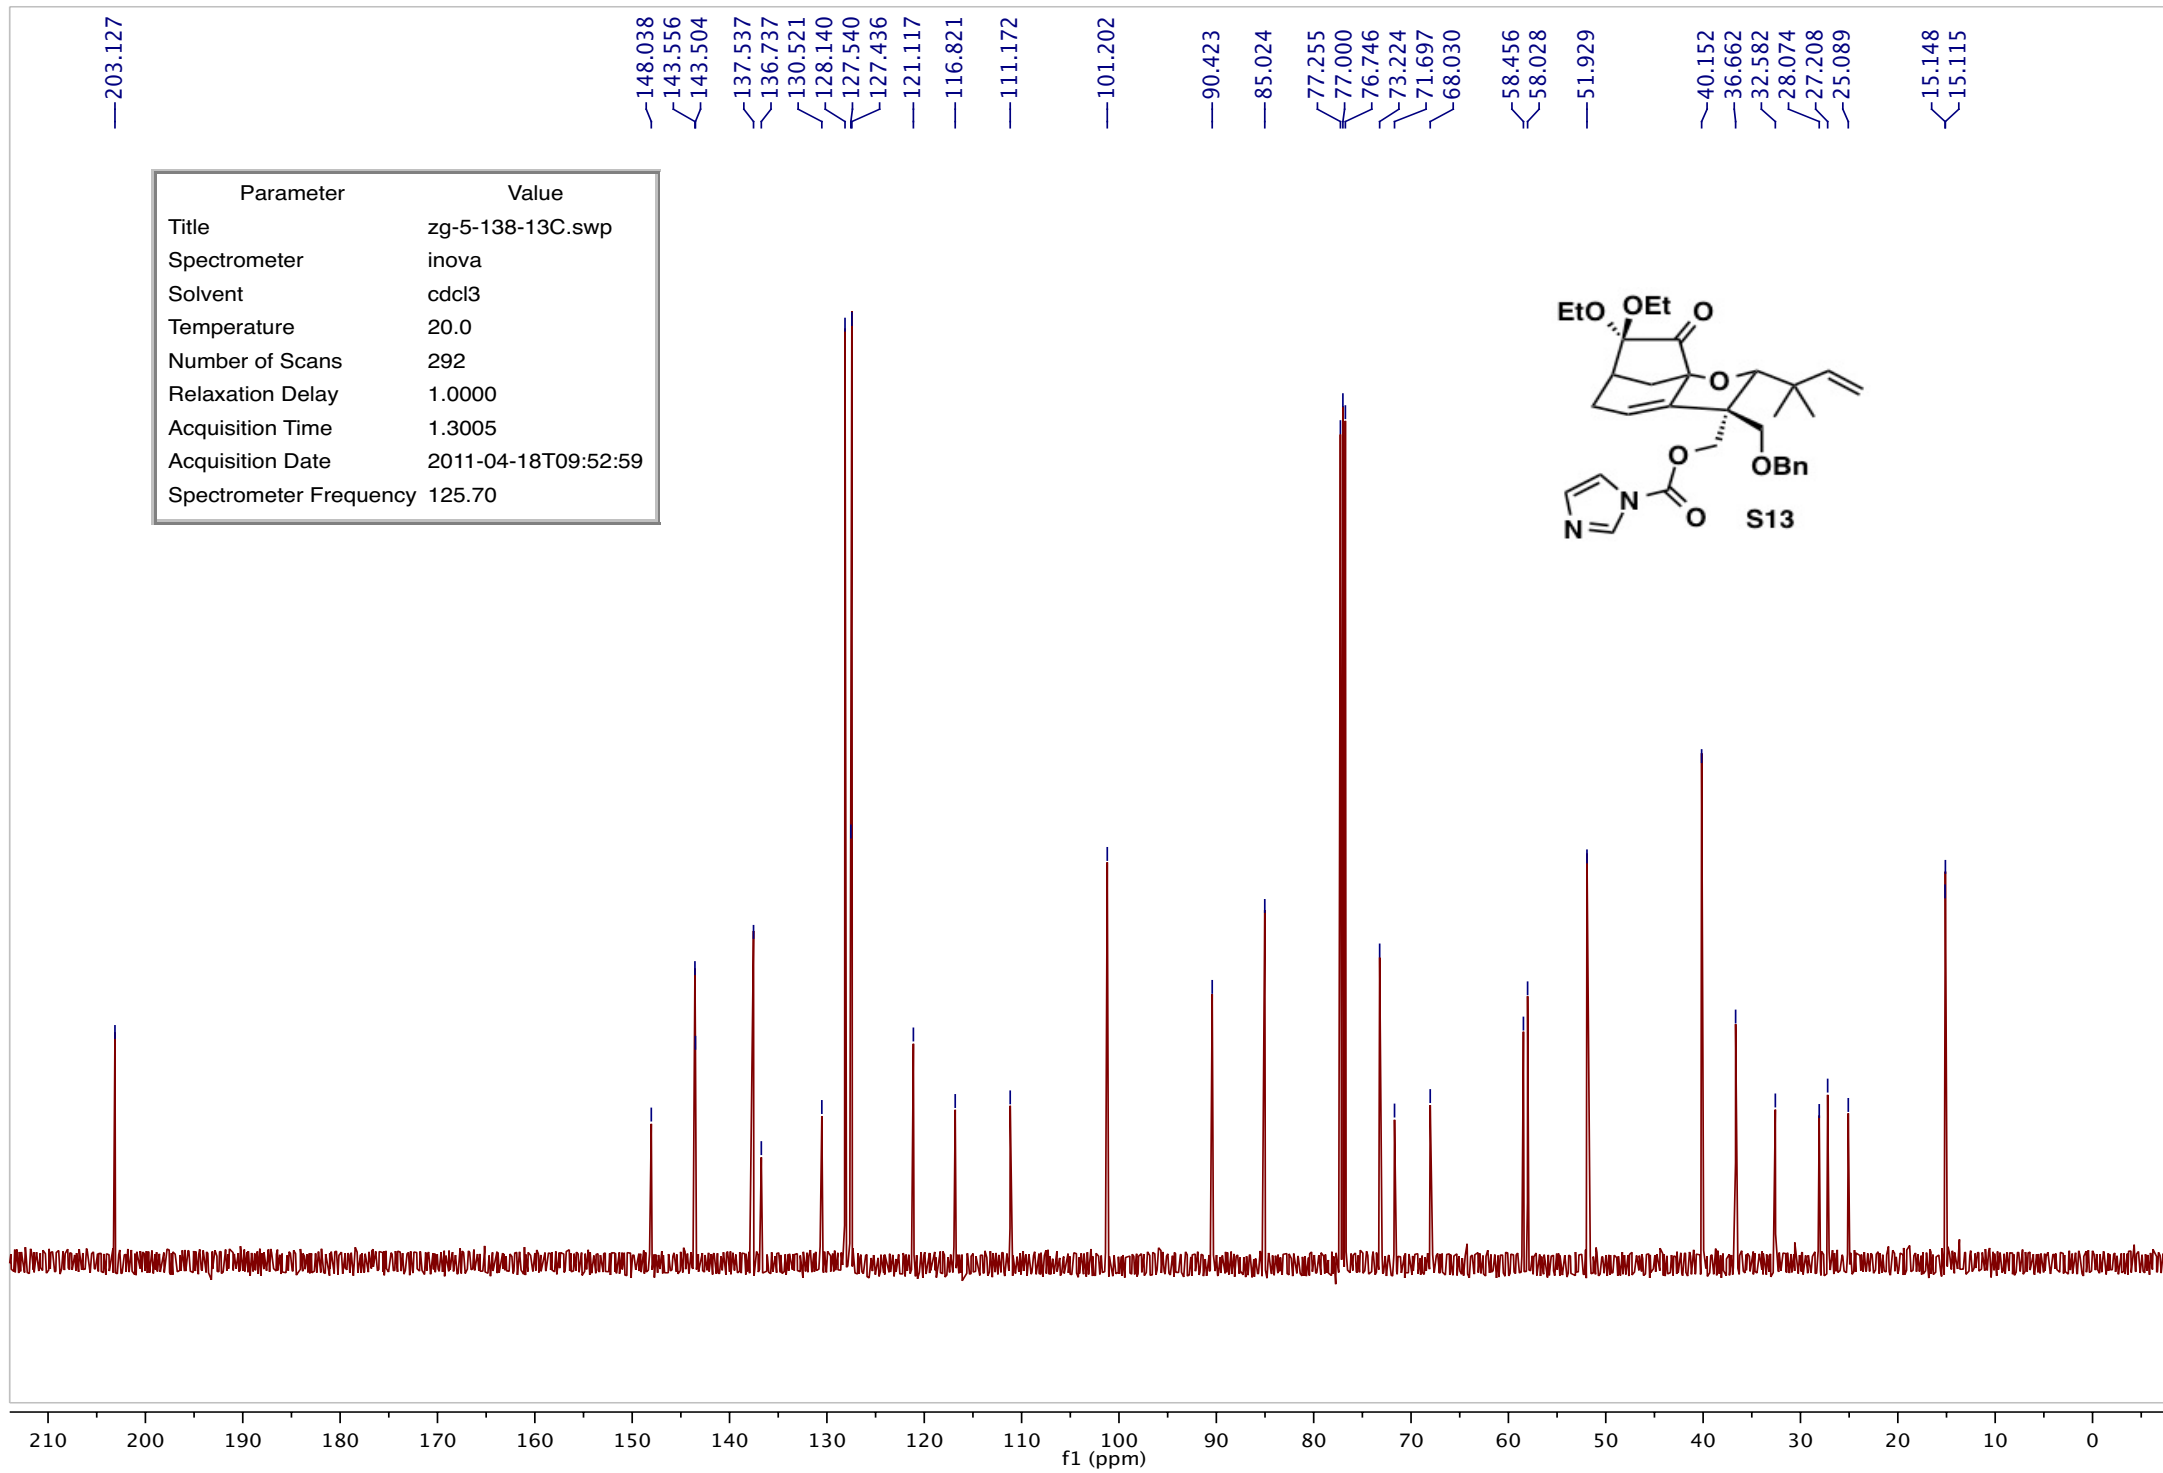

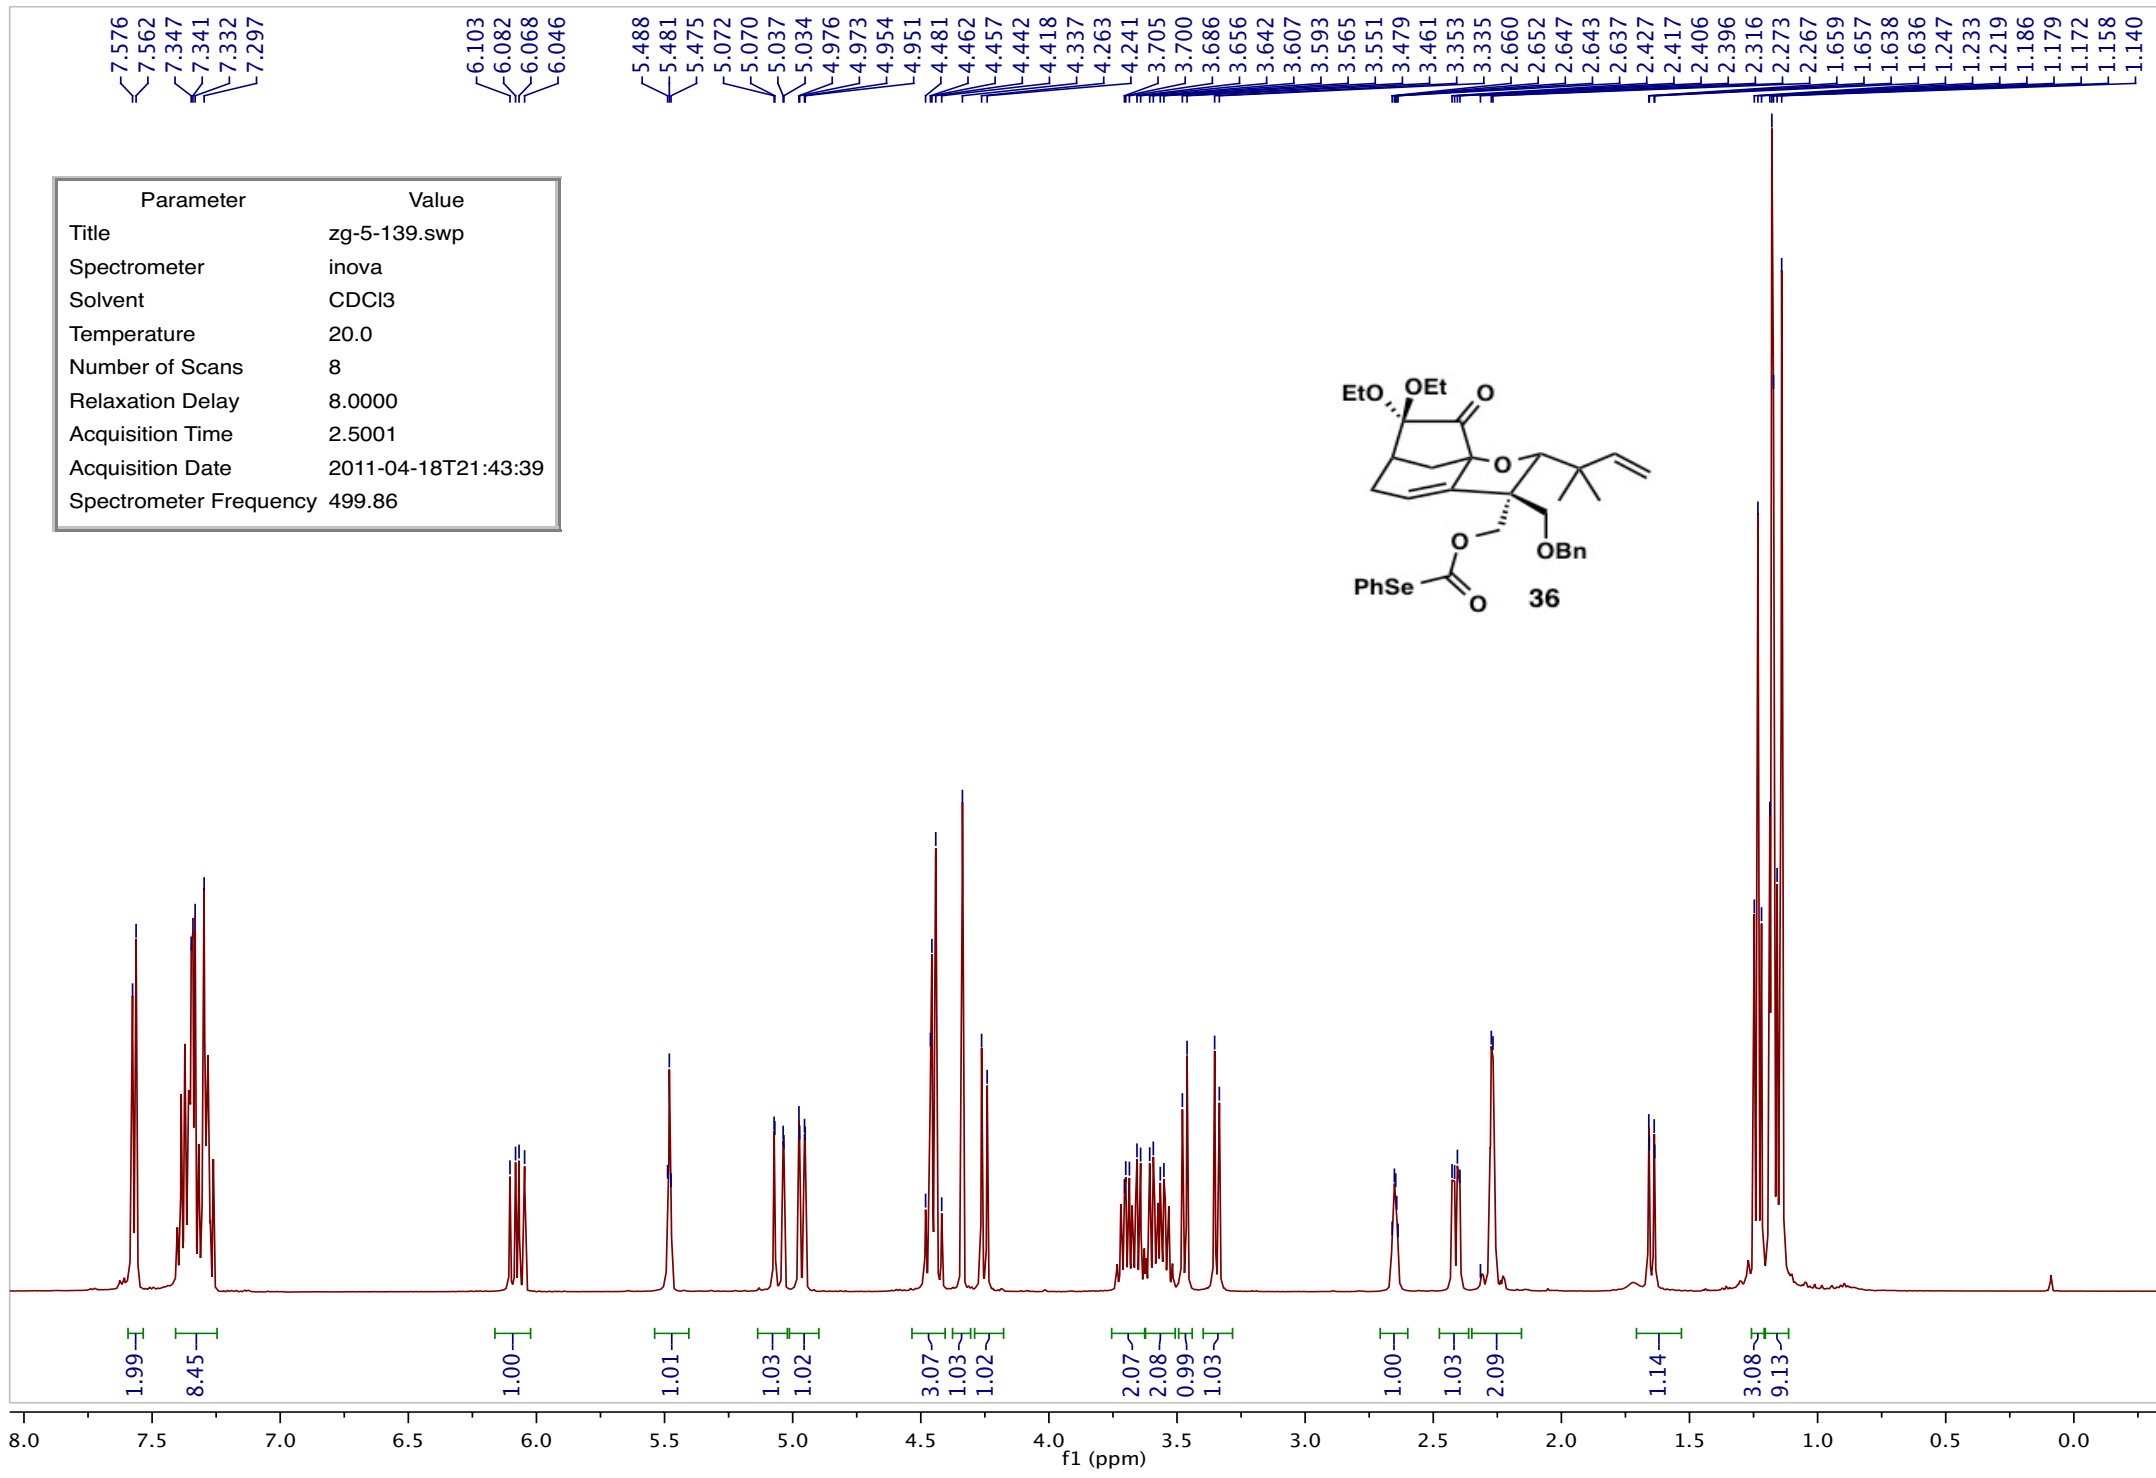

| Parameter              | Value               |
|------------------------|---------------------|
| Title                  | zg-5-139.swp        |
| Spectrometer           | inova               |
| Solvent                | CDCl3               |
| Temperature            | 20.0                |
| Number of Scans        | 8                   |
| Relaxation Delay       | 8.0000              |
| Acquisition Time       | 2.5001              |
| Acquisition Date       | 2011-04-18T21:43:39 |
| Spectrometer Frequency | 499.86              |

7.576  
7.562  
7.347  
7.341  
7.332  
7.297

6.103  
6.082  
6.068  
6.046

5.488  
5.481  
5.475

5.072  
5.070  
5.037  
5.034

4.976  
4.973  
4.954  
4.951

4.481  
4.462  
4.457  
4.442  
4.418  
4.337  
4.263

4.241  
3.705  
3.700  
3.686

3.656  
3.642  
3.607  
3.593  
3.565  
3.551  
3.479

3.461  
3.353  
3.335  
2.660  
2.652  
2.647  
2.643

2.637  
2.427  
2.417  
2.406  
2.396  
2.316  
2.273  
2.267

1.659  
1.657  
1.638  
1.636  
1.247  
1.233  
1.219  
1.186  
1.179  
1.172  
1.158  
1.140

1.99

8.45

1.00

1.01

1.03

1.02

3.07

1.03

1.02

2.07

2.08

0.99

1.03

1.00

1.03

2.09

1.14

3.08

9.13

8.0 7.5 7.0 6.5 6.0 5.5 5.0 4.5 4.0 3.5 3.0 2.5 2.0 1.5 1.0 0.5 0.0

f1 (ppm)

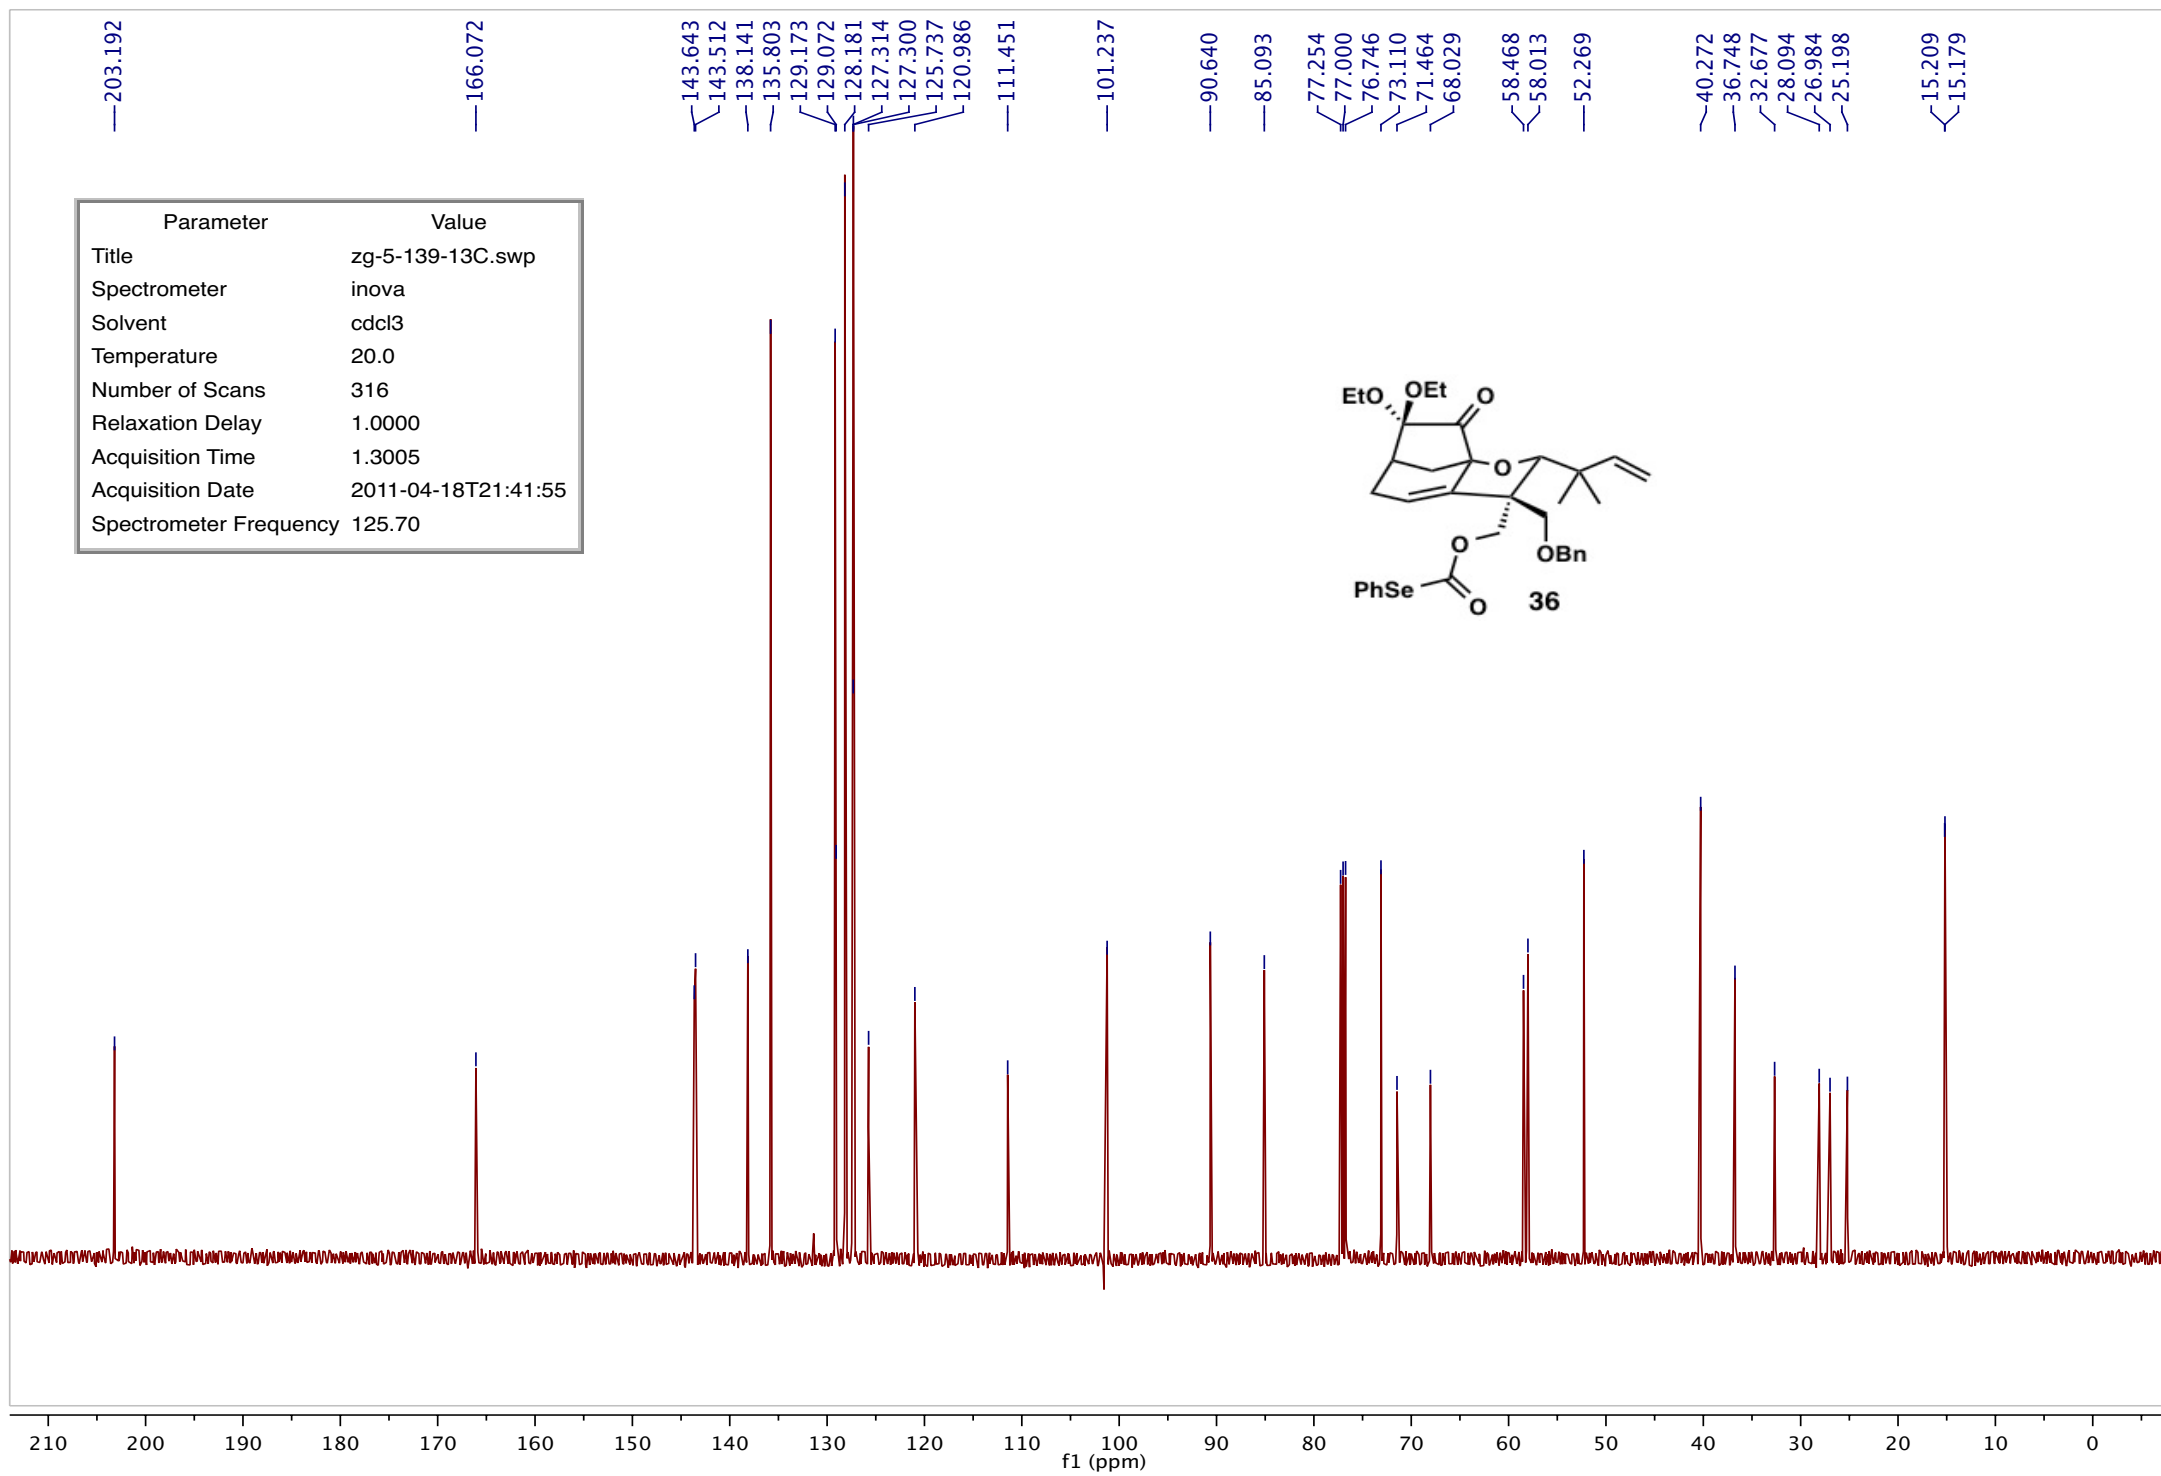

| Parameter              | Value               |
|------------------------|---------------------|
| Title                  | zg-5-139-13C.swp    |
| Spectrometer           | inova               |
| Solvent                | cdcl3               |
| Temperature            | 20.0                |
| Number of Scans        | 316                 |
| Relaxation Delay       | 1.0000              |
| Acquisition Time       | 1.3005              |
| Acquisition Date       | 2011-04-18T21:41:55 |
| Spectrometer Frequency | 125.70              |

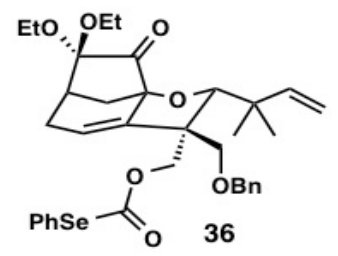

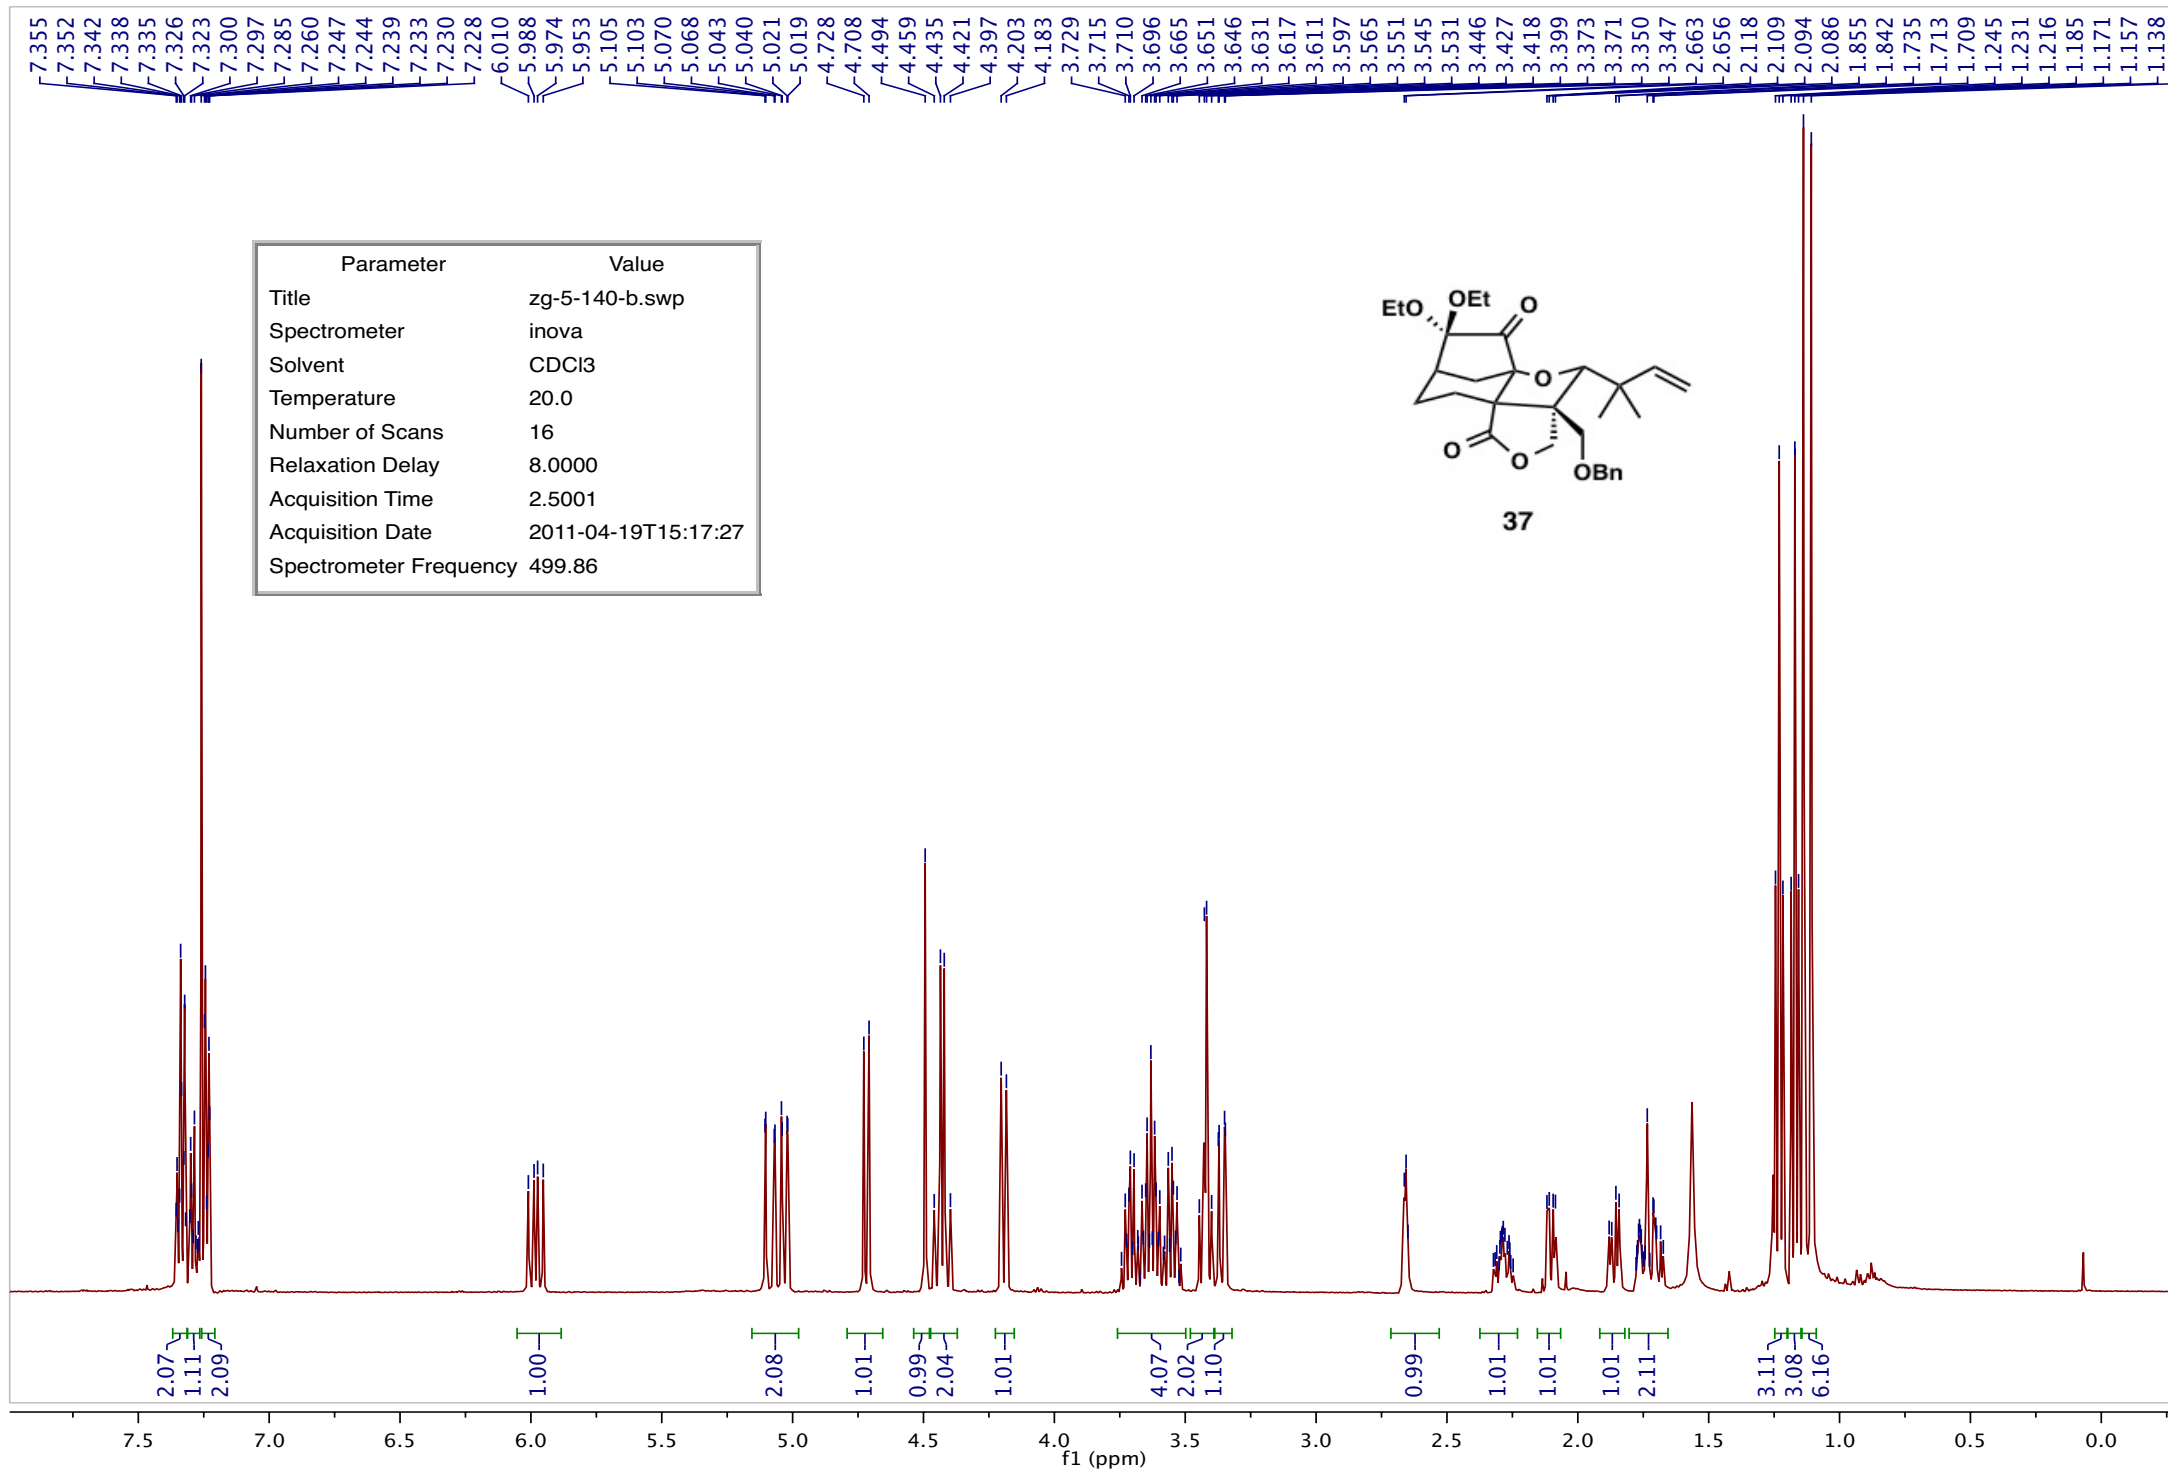

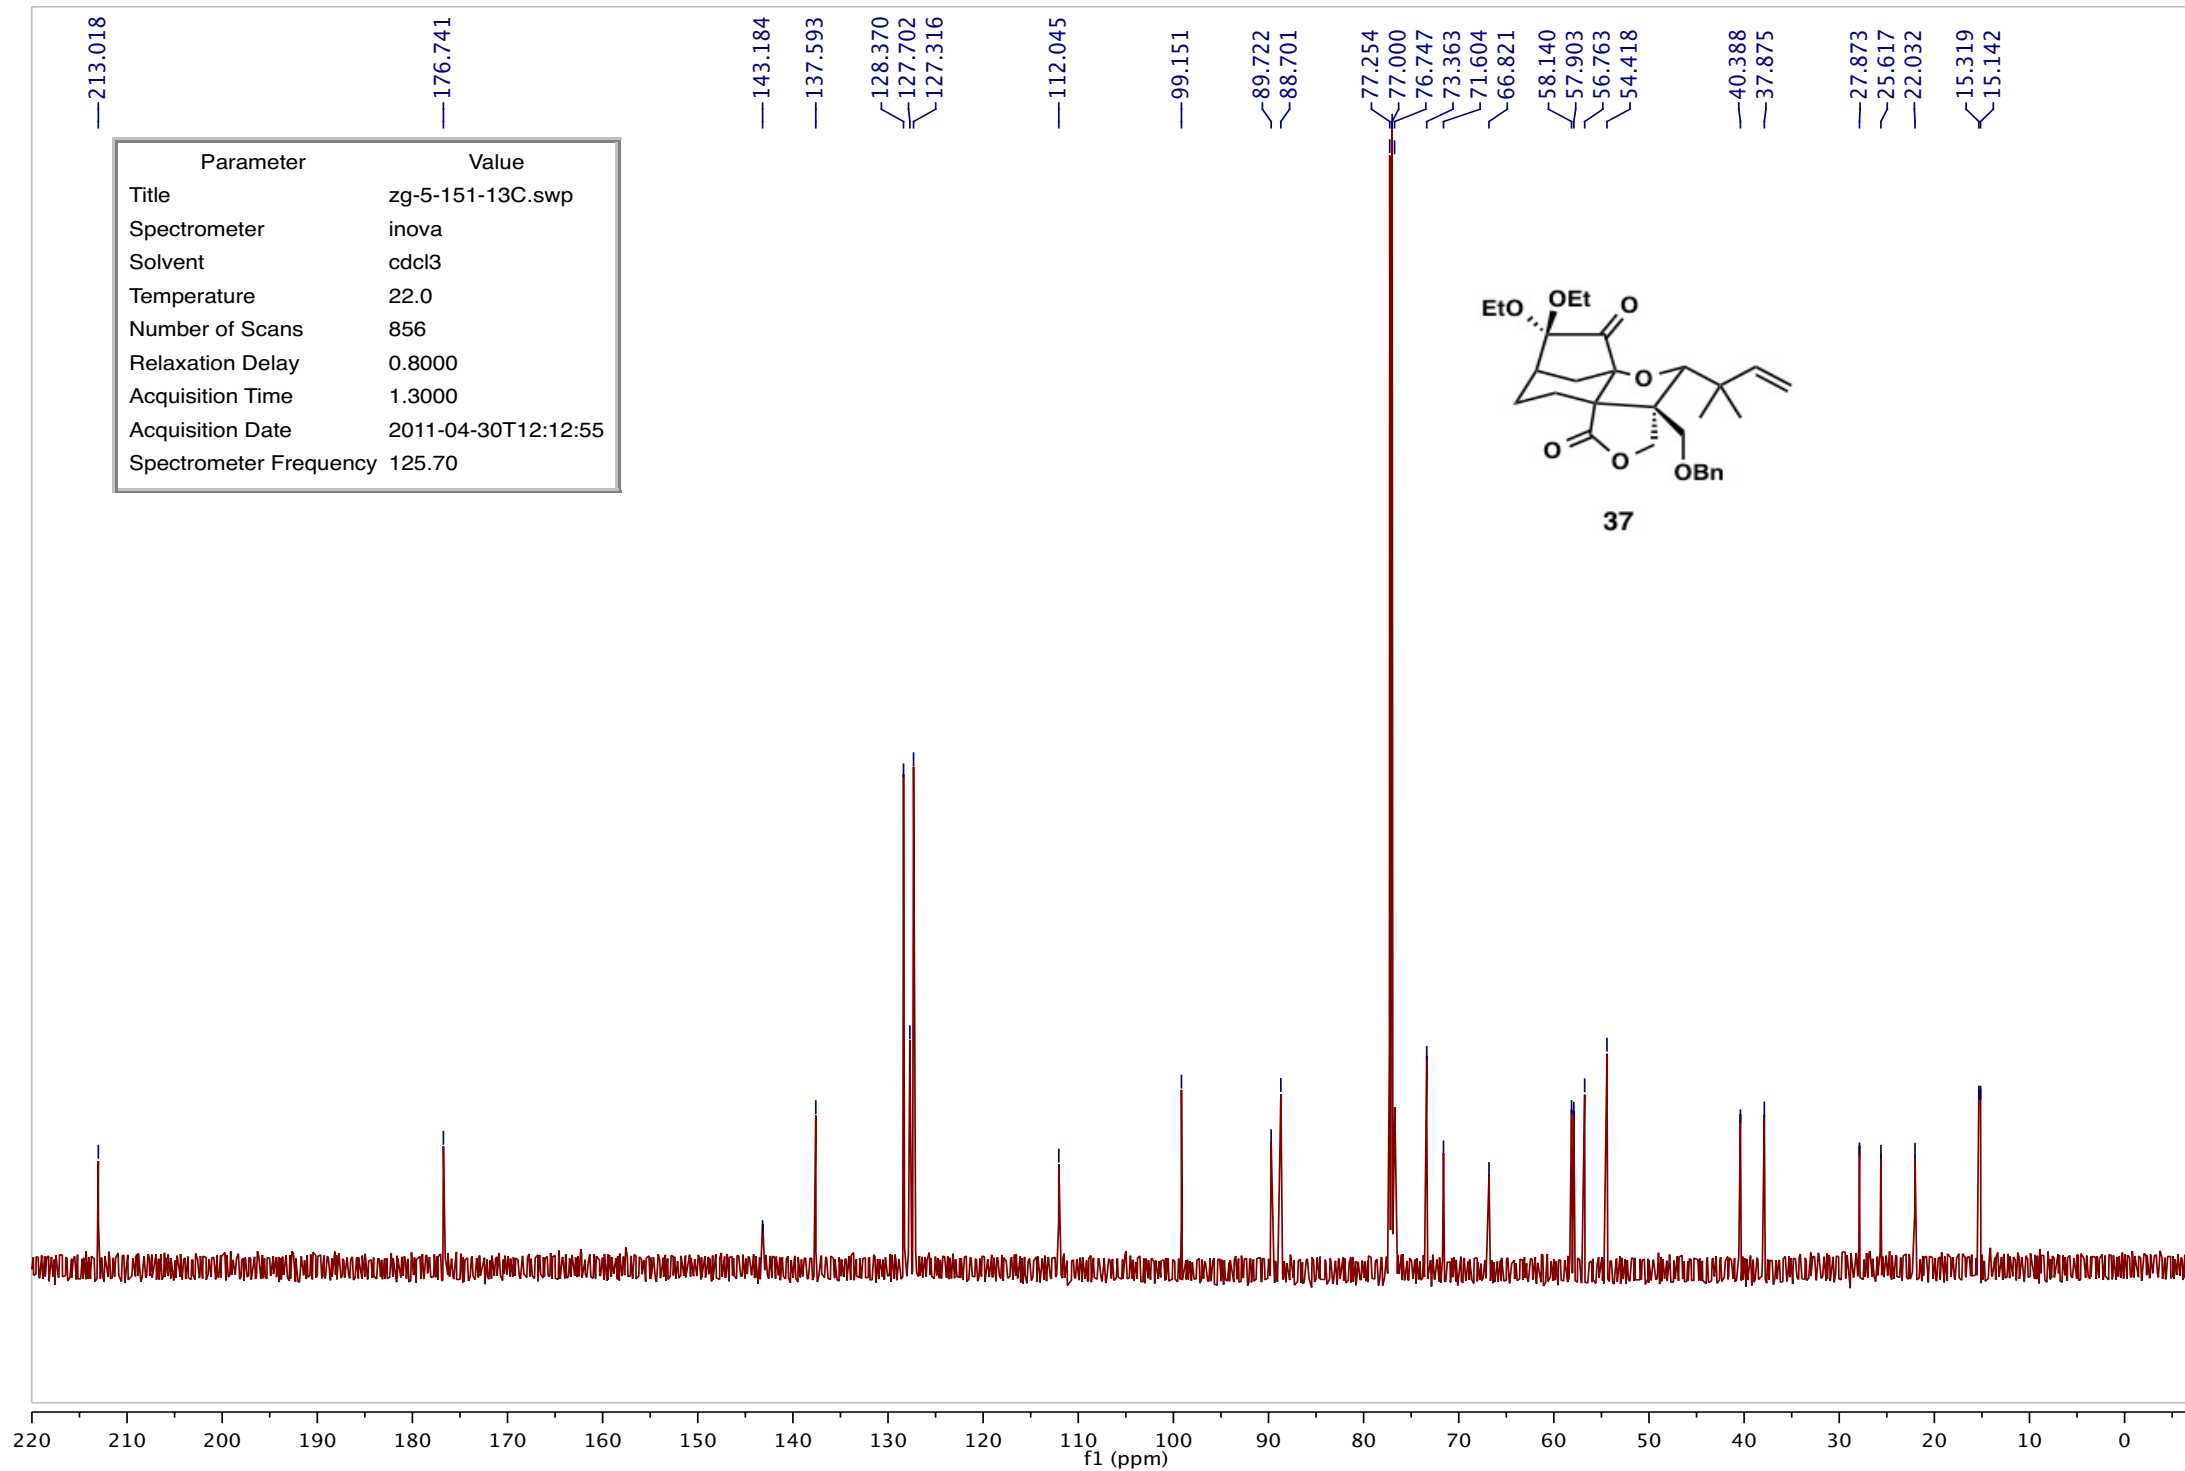

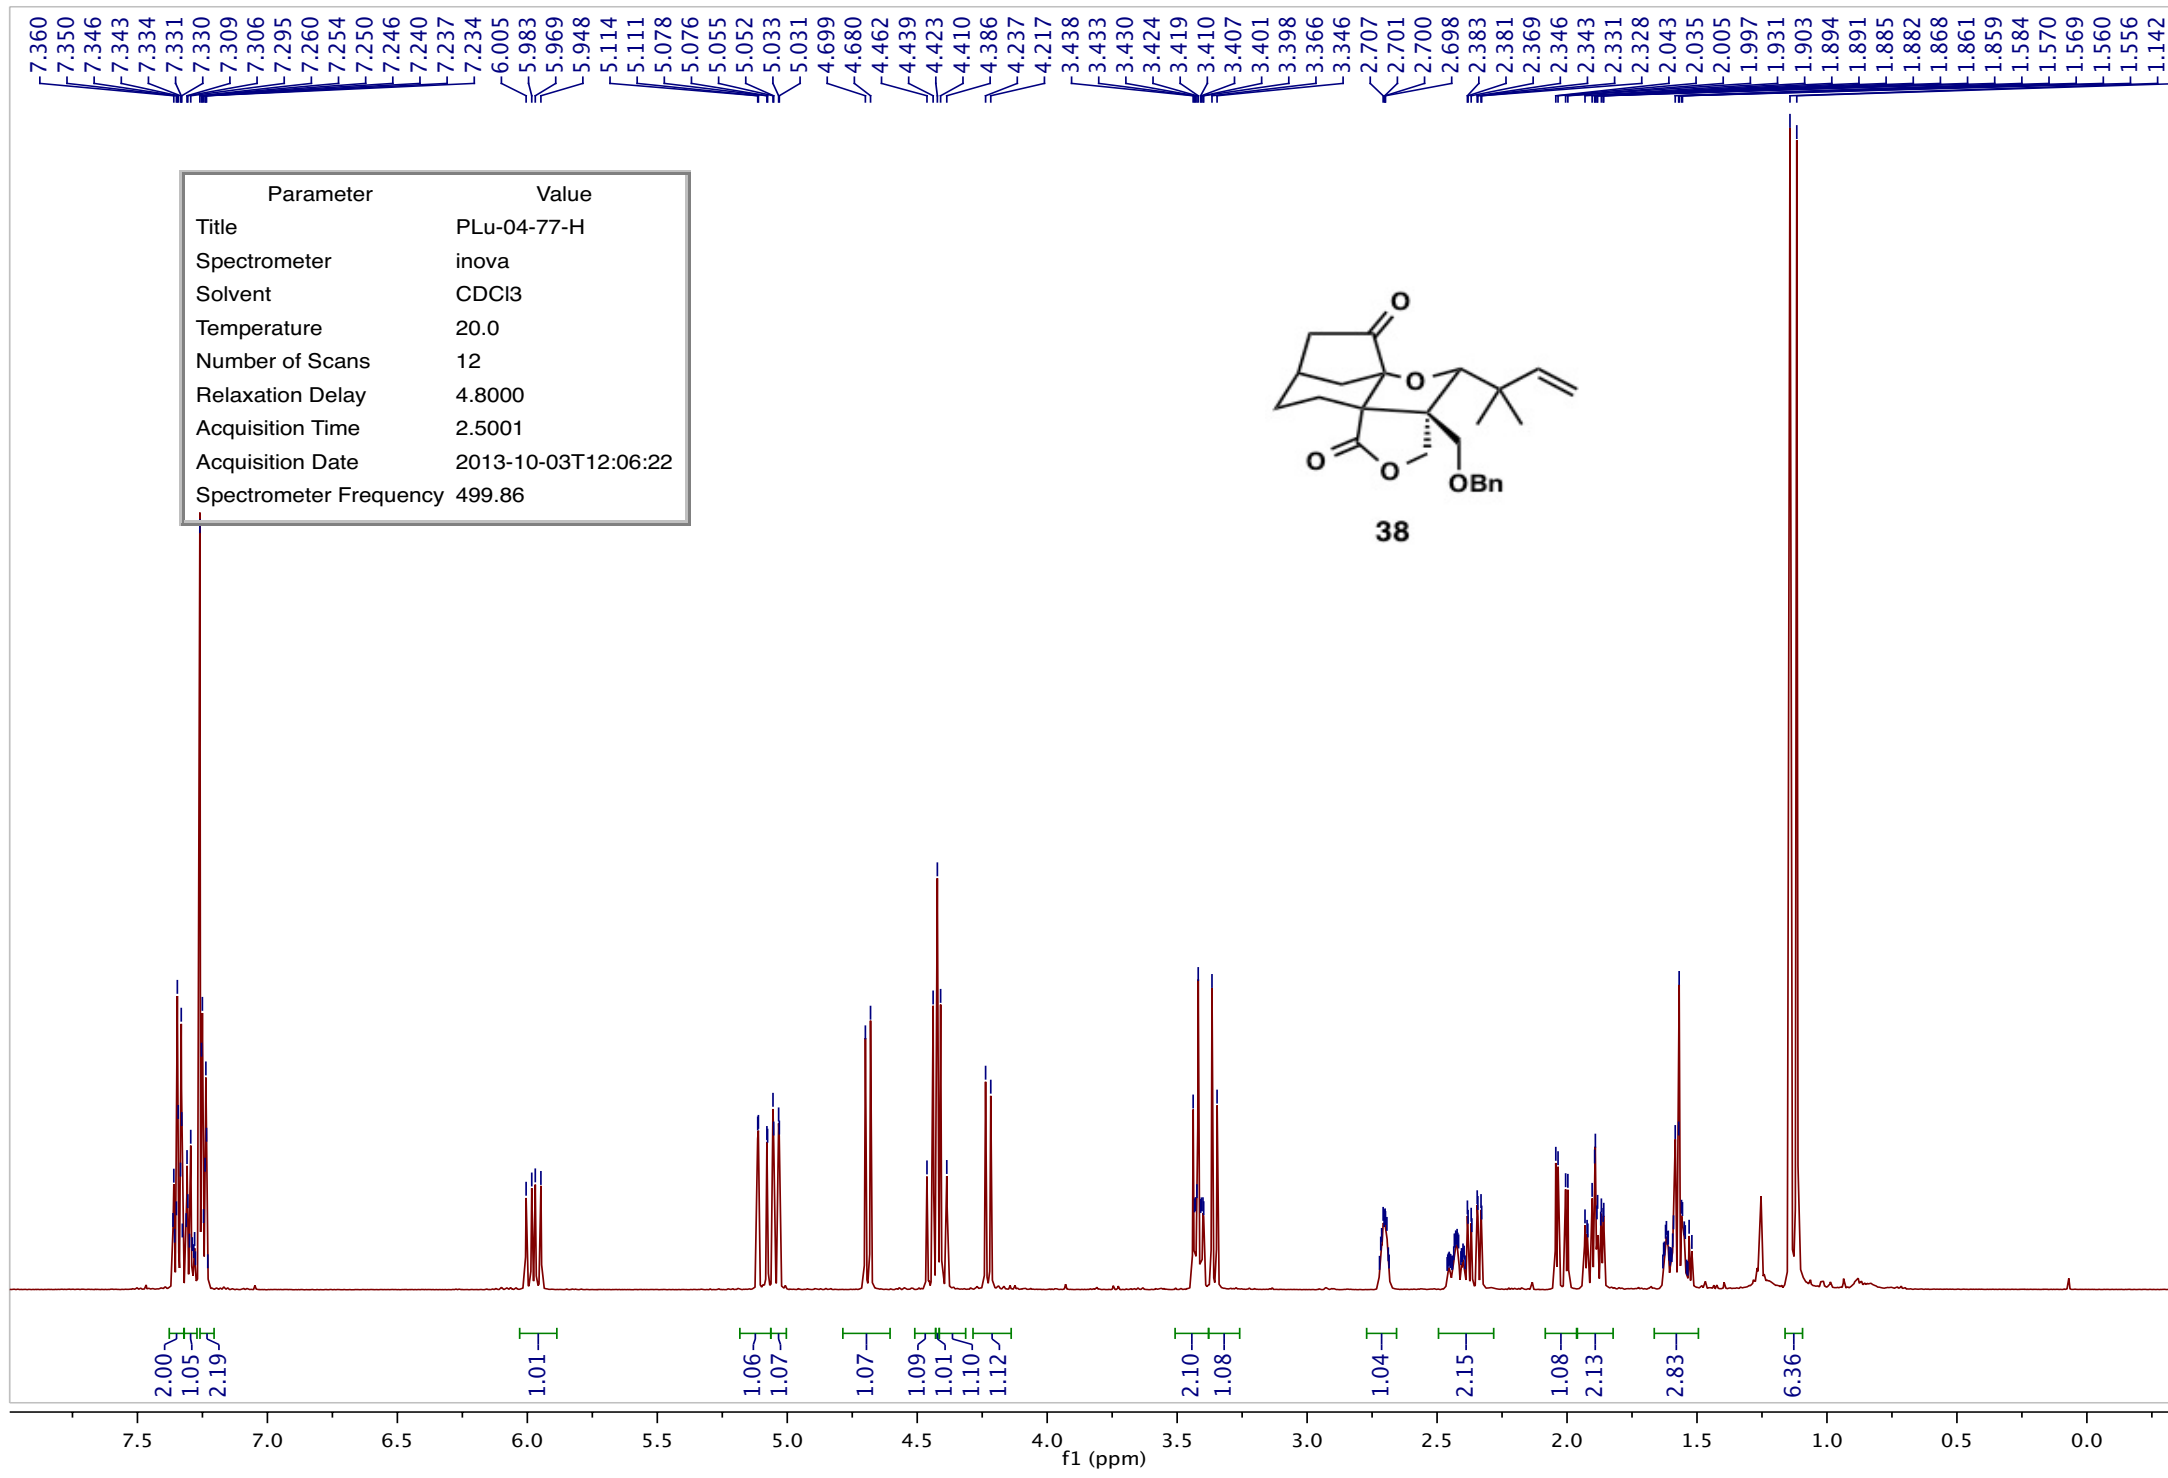

| Parameter              | Value               |
|------------------------|---------------------|
| Title                  | PLu-04-77-H         |
| Spectrometer           | inova               |
| Solvent                | CDCl3               |
| Temperature            | 20.0                |
| Number of Scans        | 12                  |
| Relaxation Delay       | 4.8000              |
| Acquisition Time       | 2.5001              |
| Acquisition Date       | 2013-10-03T12:06:22 |
| Spectrometer Frequency | 499.86              |

7.360  
7.350  
7.346  
7.343  
7.334  
7.331  
7.330  
7.309  
7.306  
7.295  
7.260  
7.254  
7.250  
7.246  
7.240  
7.237  
7.234  
6.005  
5.983  
5.969  
5.948  
5.114  
5.111  
5.078  
5.076  
5.055  
5.052  
5.033  
5.031  
4.699  
4.680  
4.462  
4.439  
4.423  
4.410  
4.386  
4.237  
4.217  
3.438  
3.433  
3.430  
3.424  
3.419  
3.410  
3.407  
3.401  
3.398  
3.366  
3.346  
2.707  
2.701  
2.700  
2.698  
2.383  
2.381  
2.369  
2.346  
2.343  
2.331  
2.328  
2.043  
2.035  
2.005  
1.997  
1.931  
1.903  
1.894  
1.891  
1.885  
1.882  
1.868  
1.861  
1.859  
1.584  
1.570  
1.569  
1.560  
1.556  
1.142

2.00  
1.05  
2.19

1.01

1.06  
1.07

1.07

1.09  
1.01  
1.10  
1.12

2.10  
1.08

1.04

2.15

1.08  
2.13

2.83

6.36

f1 (ppm)

7.5  
7.0  
6.5  
6.0  
5.5  
5.0  
4.5  
4.0  
3.5  
3.0  
2.5  
2.0  
1.5  
1.0  
0.5  
0.0

—218.770

—176.344

—143.136

—137.389

—128.392

—127.804

—127.512

—112.149

—89.304

—88.915

—77.254

—77.000

—76.745

—73.275

—70.952

—66.401

—56.168

—54.351

—42.336

—40.312

—32.780

—28.606

—25.900

—24.374

| Parameter              | Value               |
|------------------------|---------------------|
| Title                  | PLu-04-77-C         |
| Spectrometer           | inova               |
| Solvent                | cdcl3               |
| Temperature            | 20.0                |
| Number of Scans        | 320                 |
| Relaxation Delay       | 1.0000              |
| Acquisition Time       | 1.3026              |
| Acquisition Date       | 2013-10-03T12:09:11 |
| Spectrometer Frequency | 125.70              |

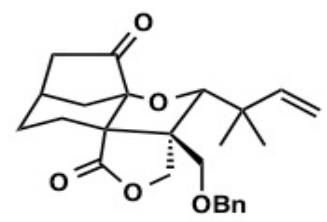

38

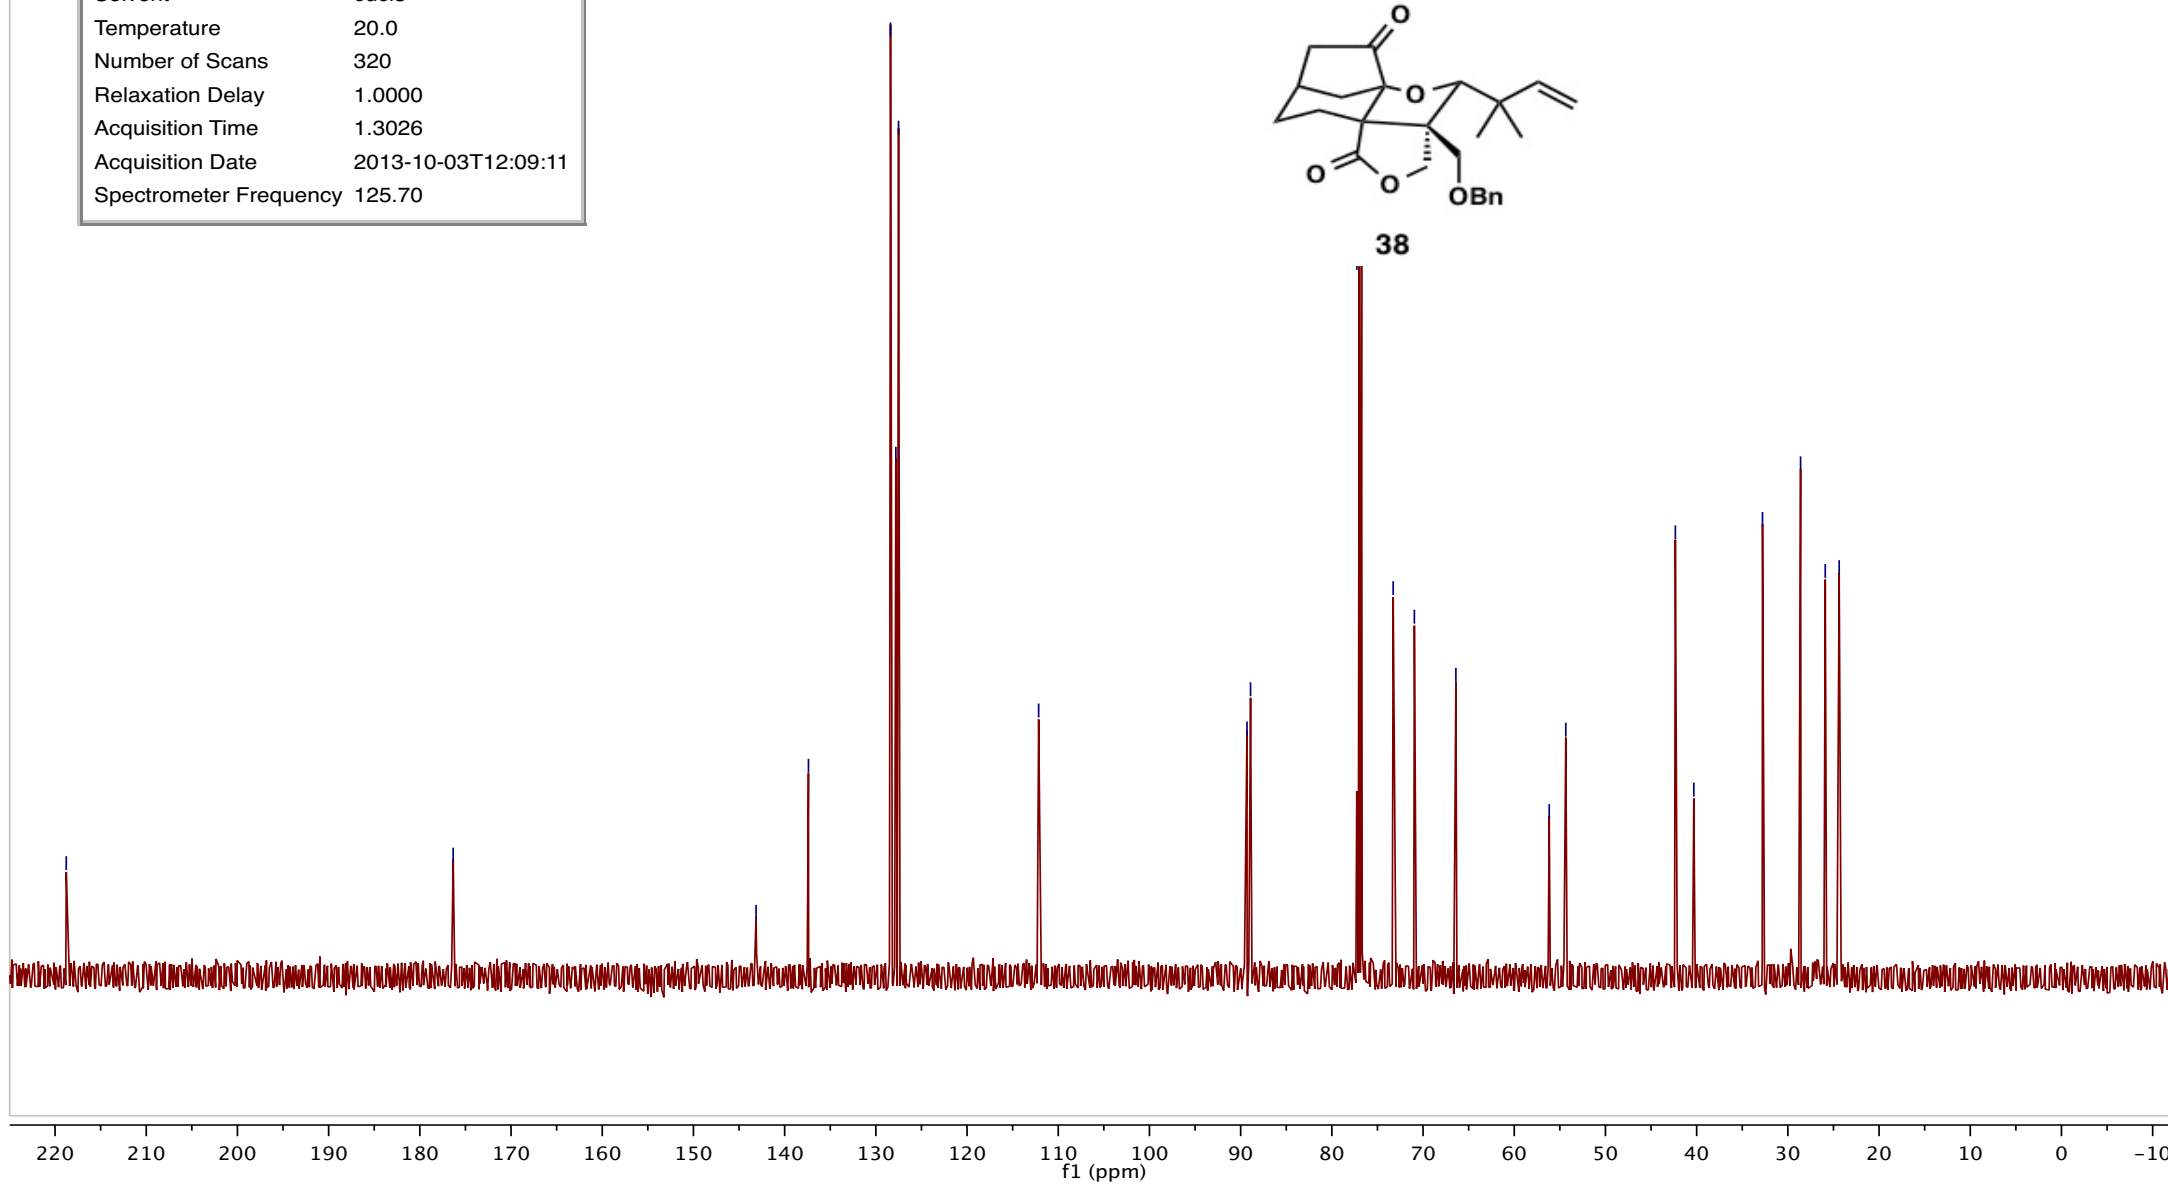



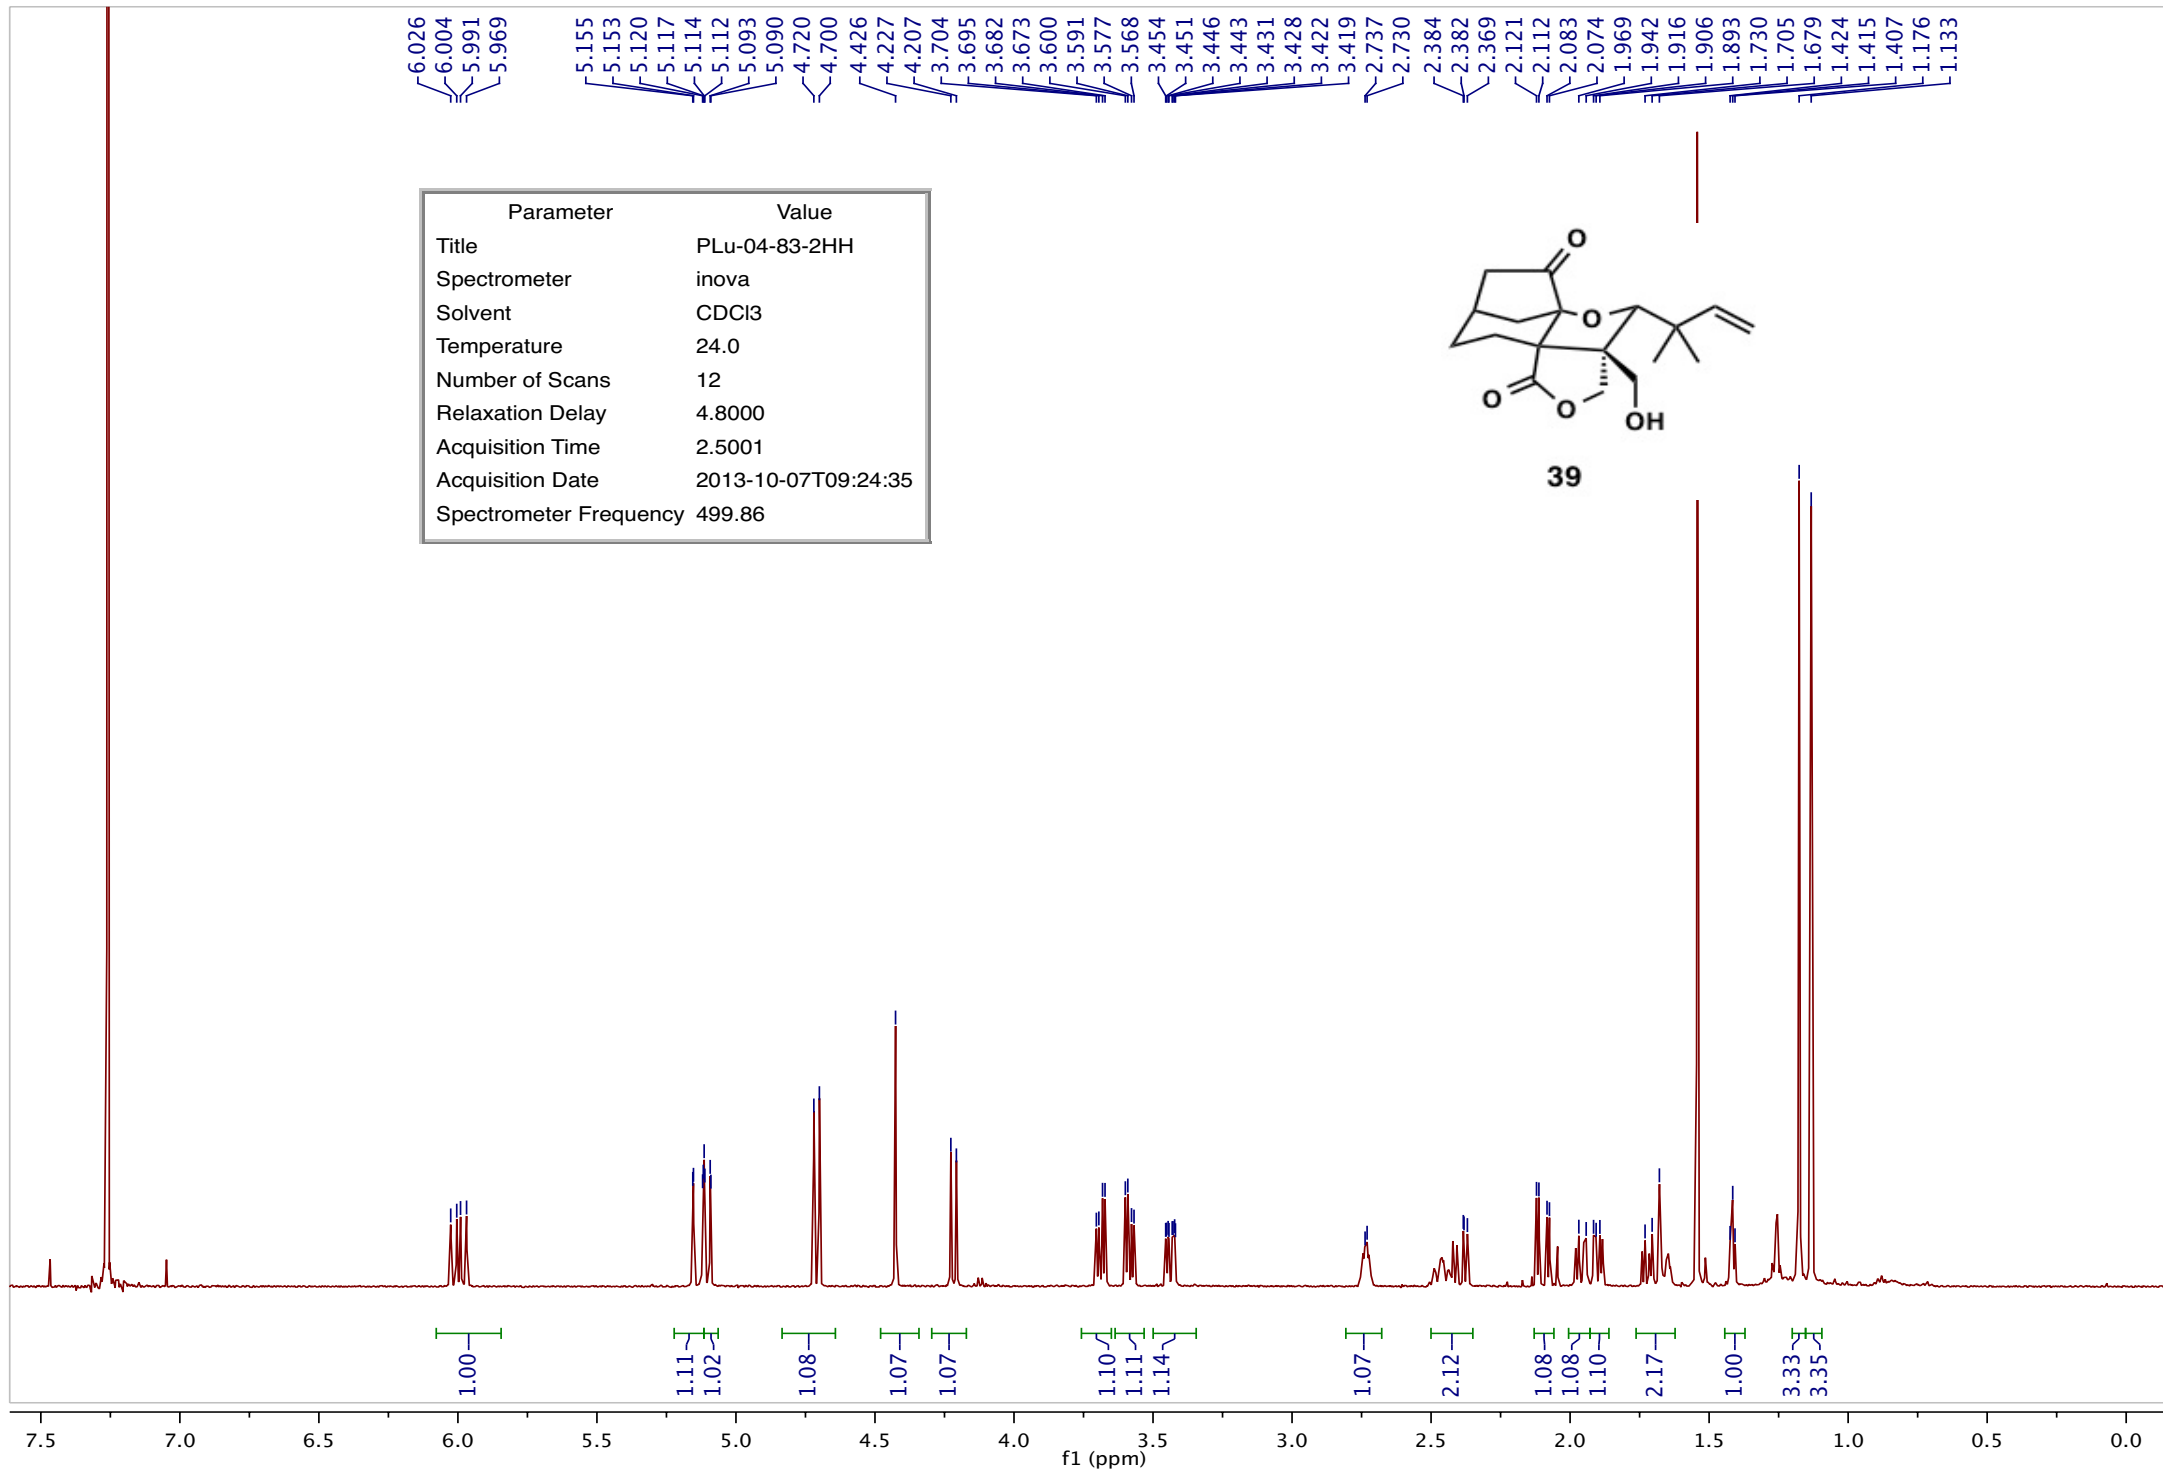

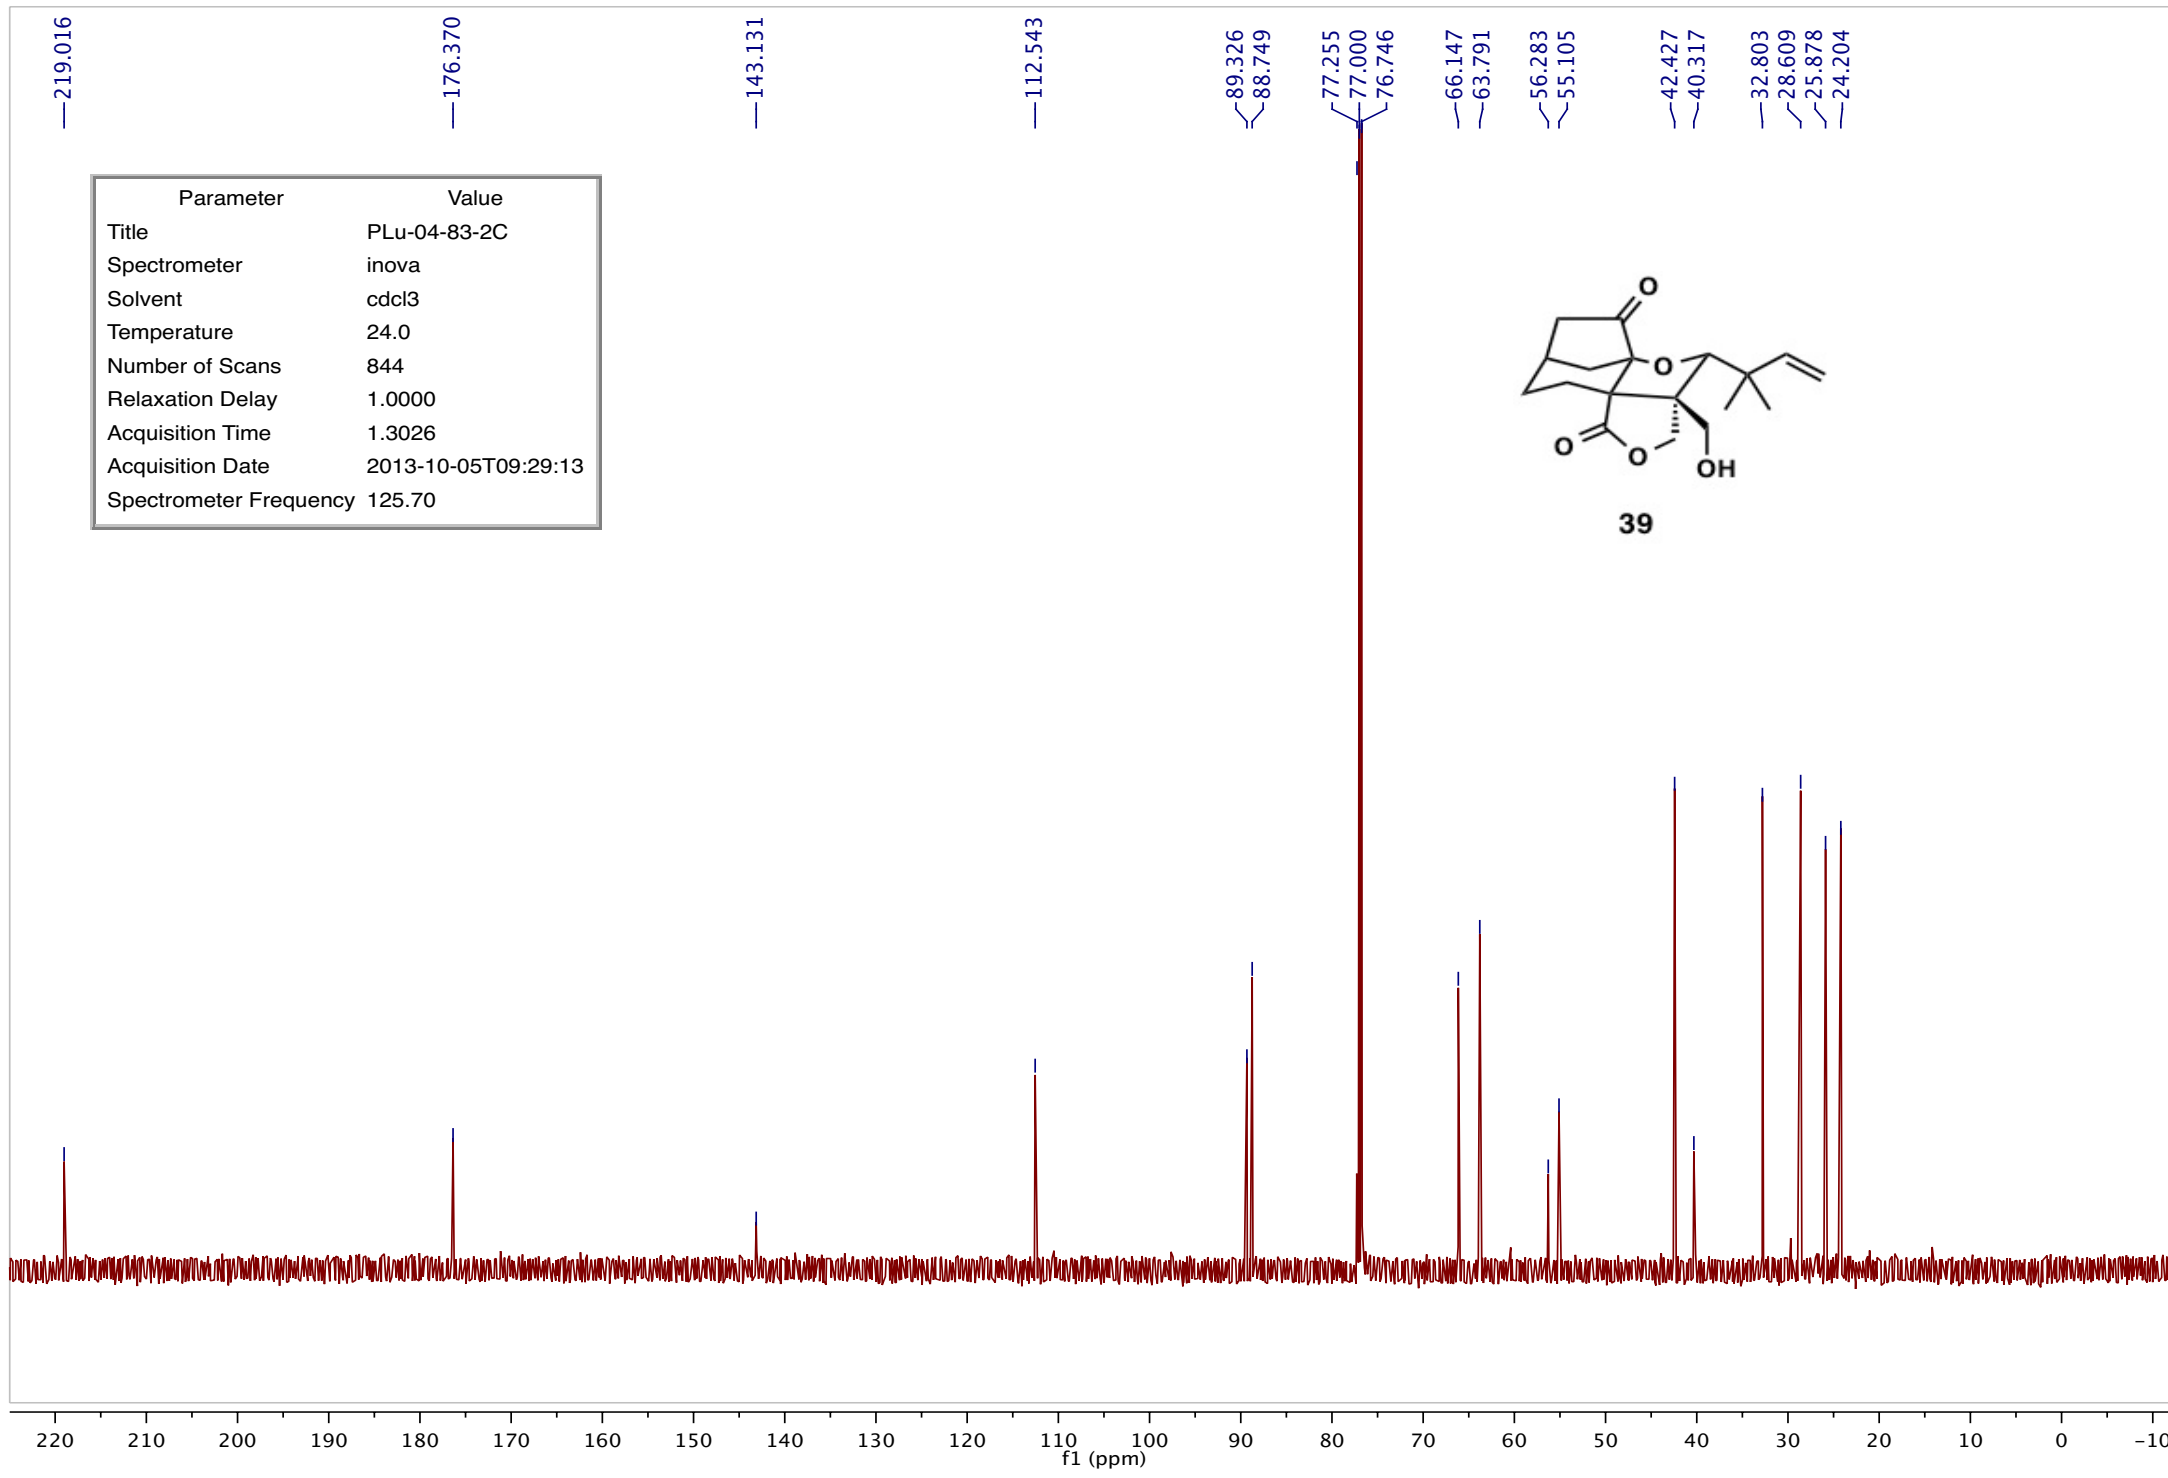

| Parameter              | Value               |
|------------------------|---------------------|
| Title                  | PLu-04-83-2C        |
| Spectrometer           | inova               |
| Solvent                | cdcl3               |
| Temperature            | 24.0                |
| Number of Scans        | 844                 |
| Relaxation Delay       | 1.0000              |
| Acquisition Time       | 1.3026              |
| Acquisition Date       | 2013-10-05T09:29:13 |
| Spectrometer Frequency | 125.70              |

219.016

176.370

143.131

112.543

89.326  
88.749

77.255  
77.000  
76.746

66.147  
63.791

56.283  
55.105

42.427  
40.317

32.803  
28.609  
25.878  
24.204

39

| Parameter              | Value               |
|------------------------|---------------------|
| Title                  | PLu-04-86-H         |
| Spectrometer           | inova               |
| Solvent                | CDCl3               |
| Temperature            | 24.0                |
| Number of Scans        | 12                  |
| Relaxation Delay       | 4.8000              |
| Acquisition Time       | 2.5001              |
| Acquisition Date       | 2013-10-07T09:32:48 |
| Spectrometer Frequency | 499.86              |

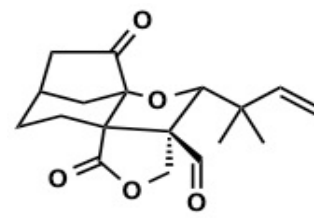

40

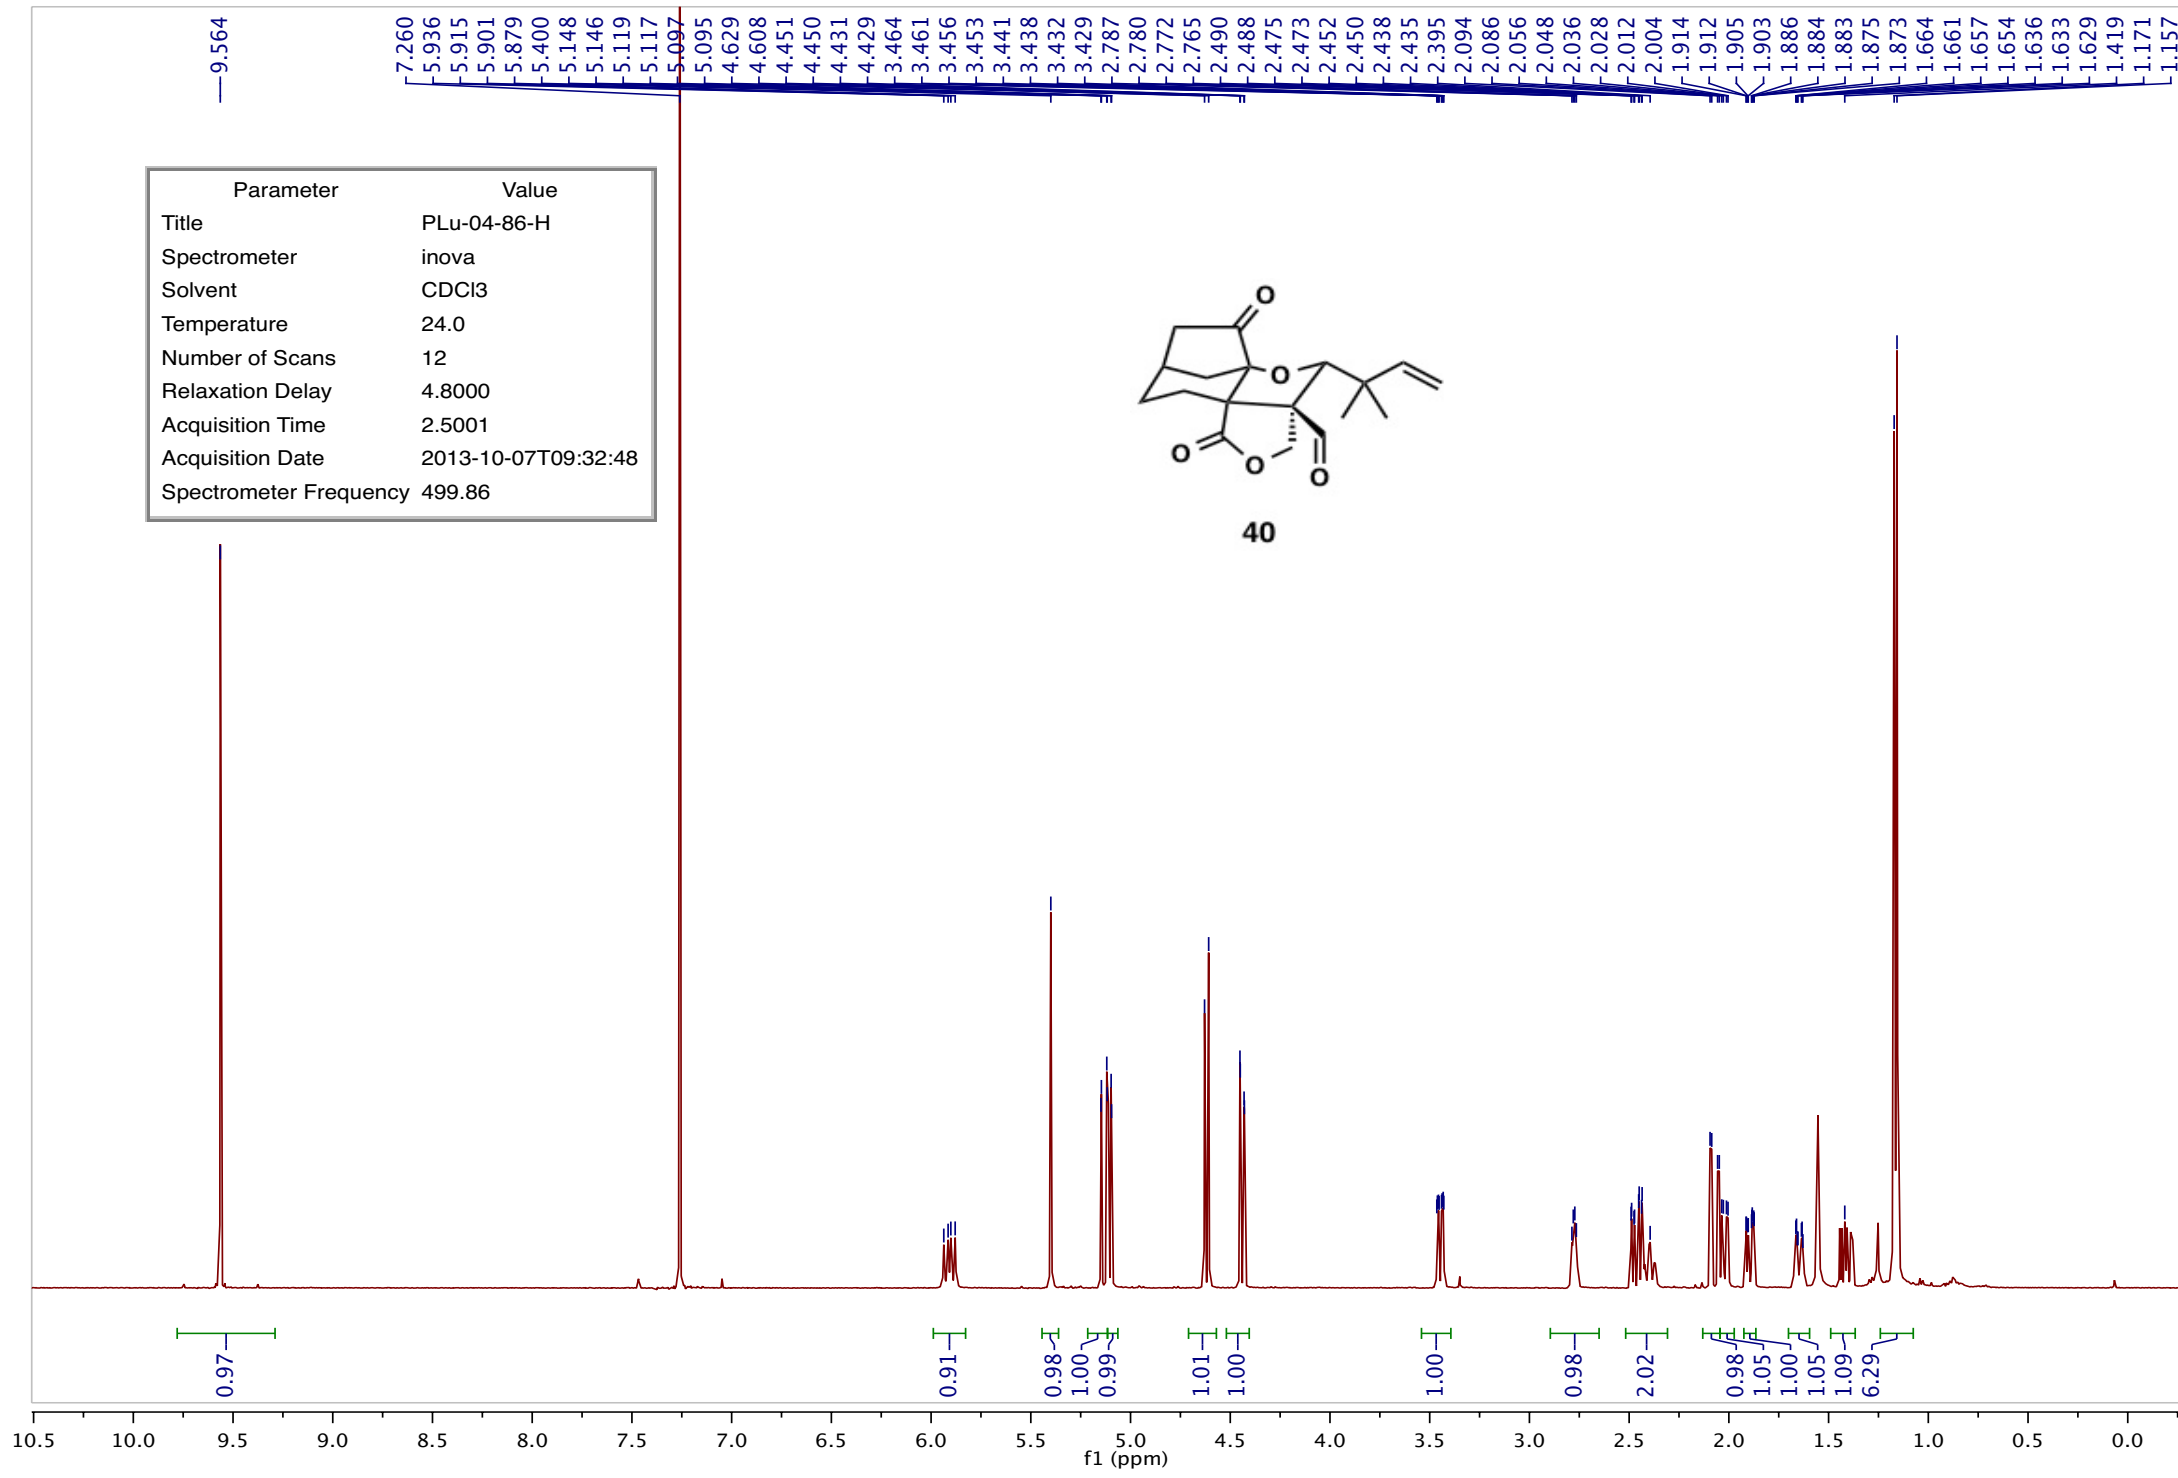

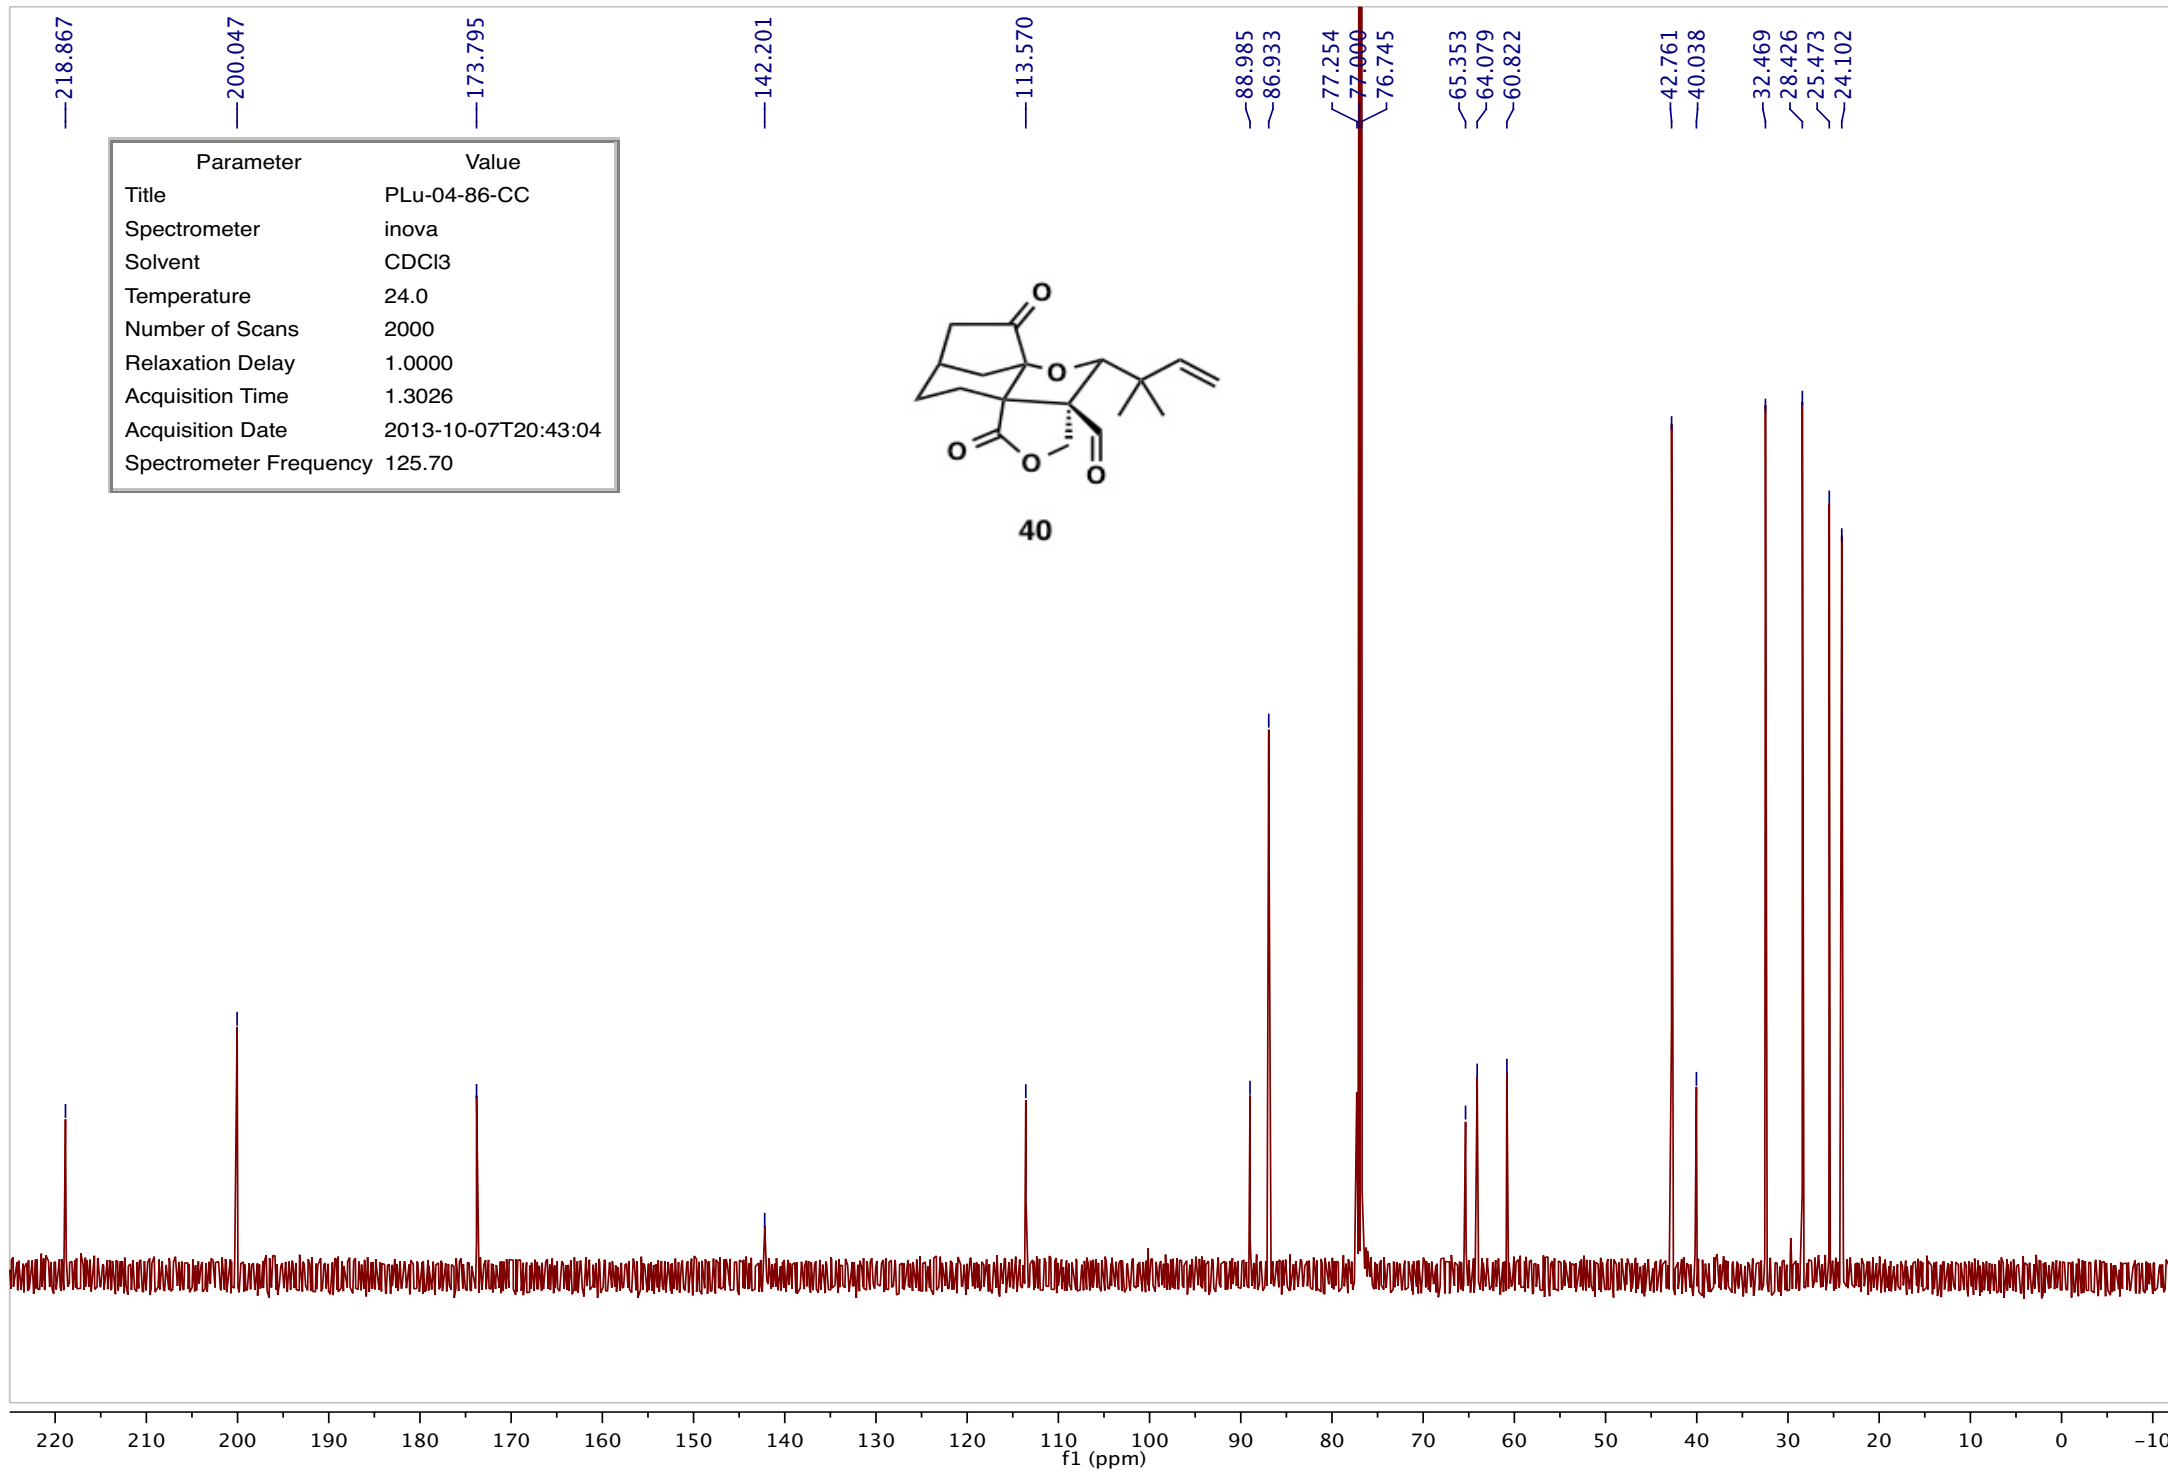

| Parameter              | Value               |
|------------------------|---------------------|
| Title                  | PLu-04-86-CC        |
| Spectrometer           | inova               |
| Solvent                | CDCl3               |
| Temperature            | 24.0                |
| Number of Scans        | 2000                |
| Relaxation Delay       | 1.0000              |
| Acquisition Time       | 1.3026              |
| Acquisition Date       | 2013-10-07T20:43:04 |
| Spectrometer Frequency | 125.70              |

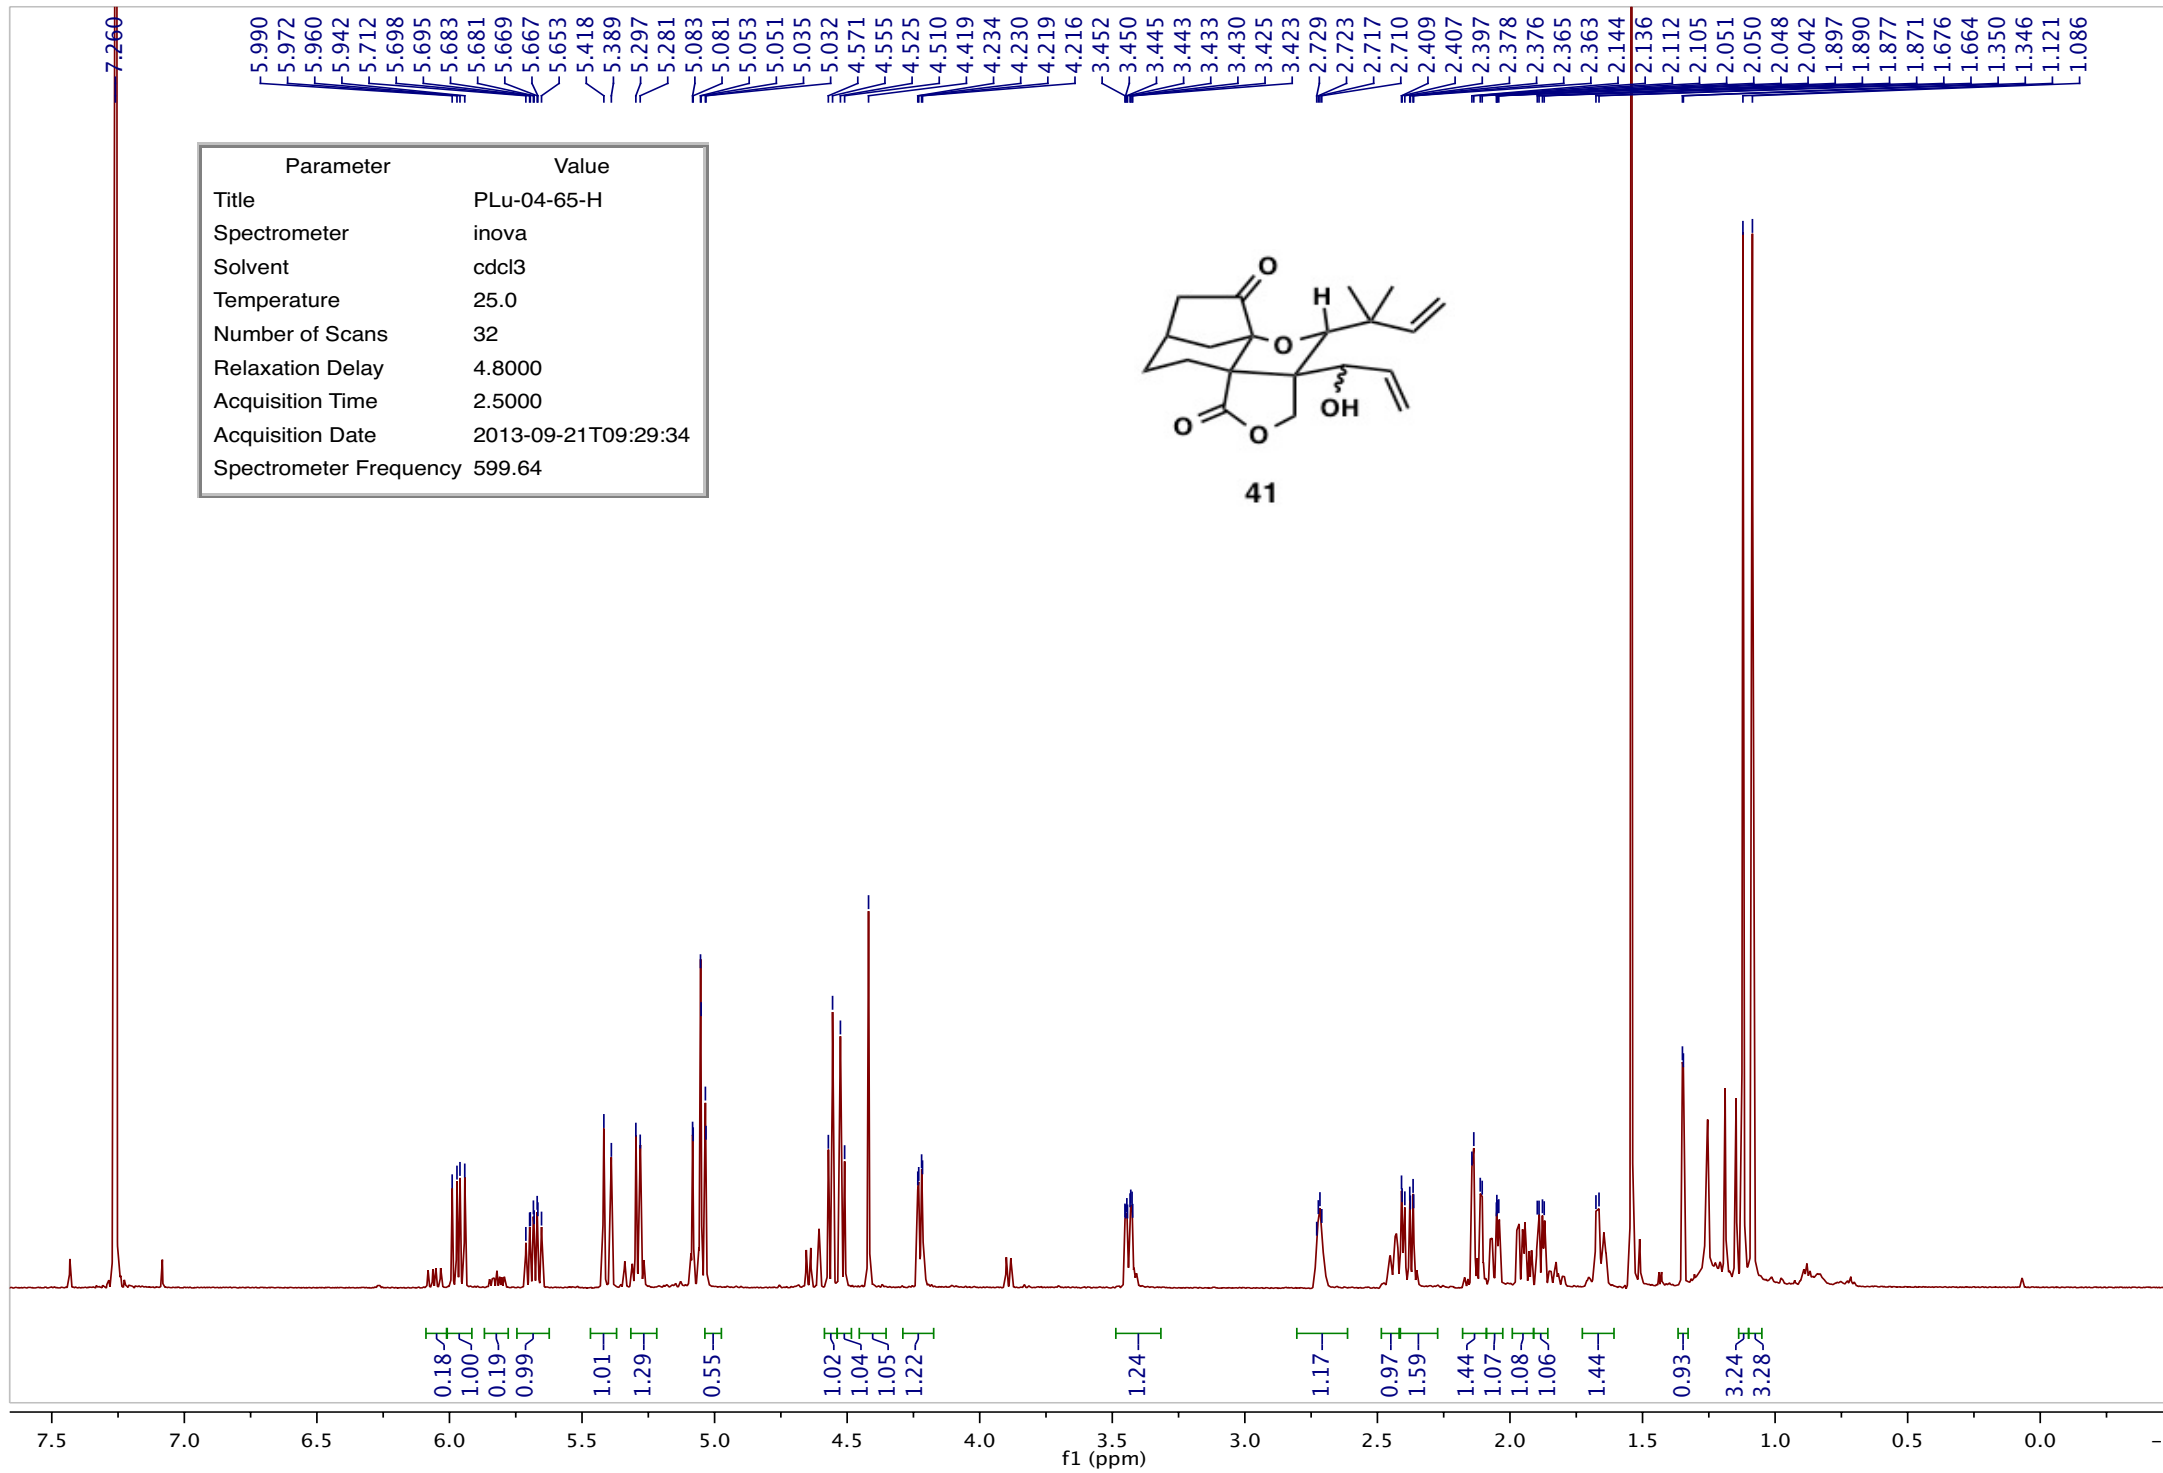

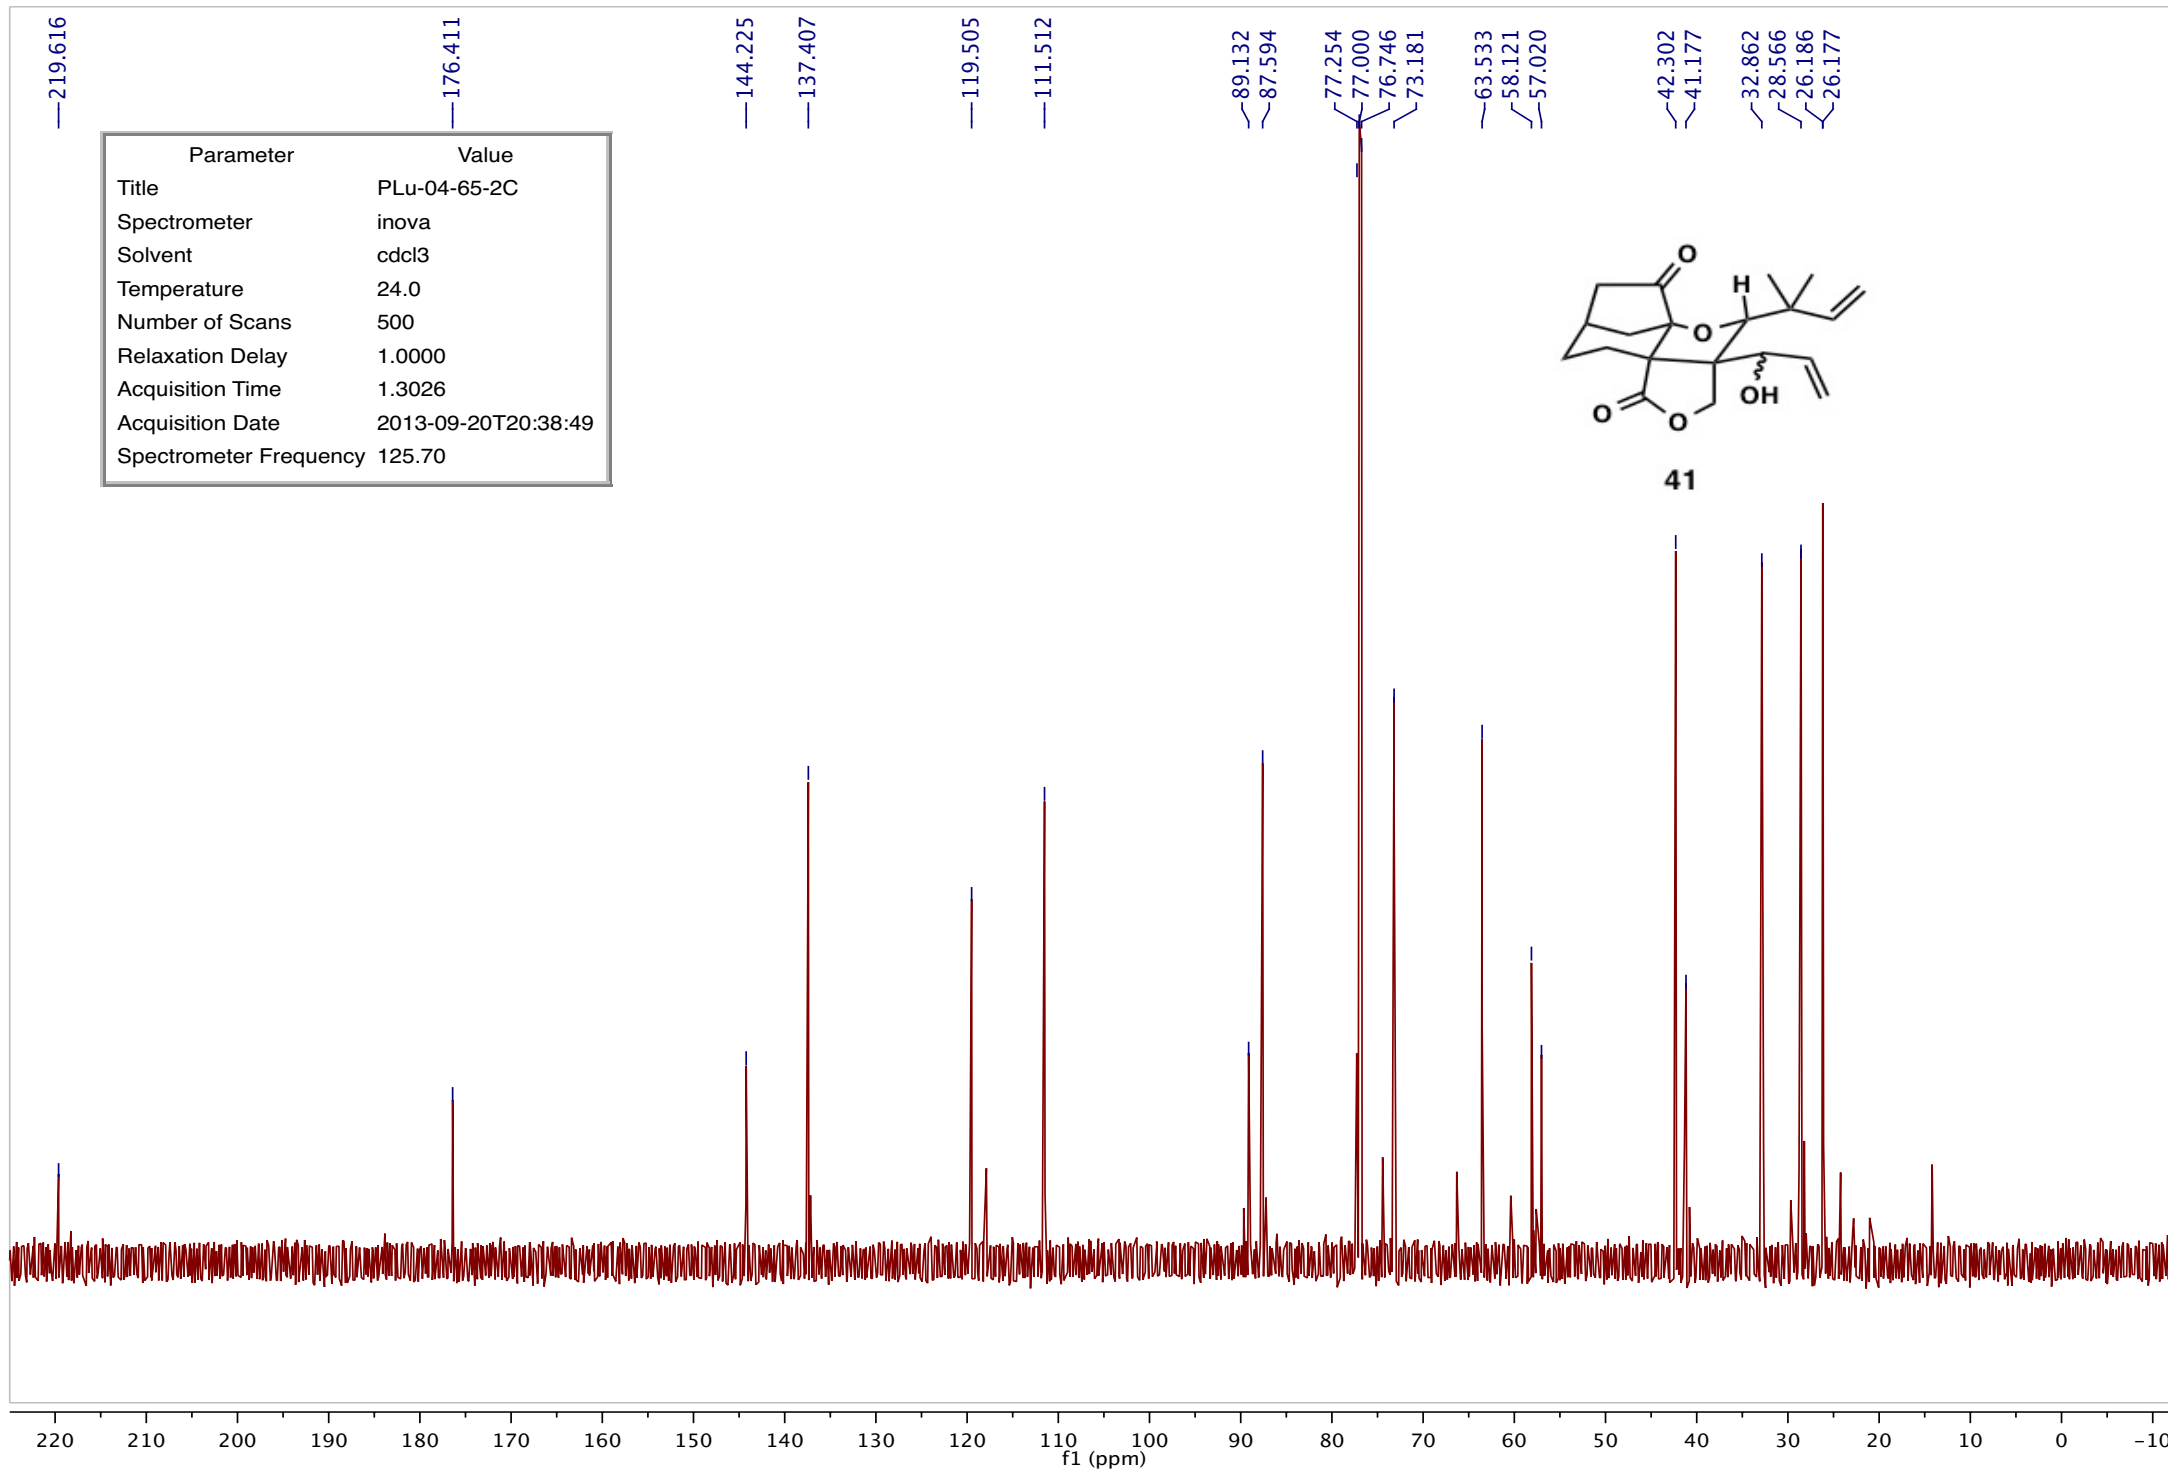

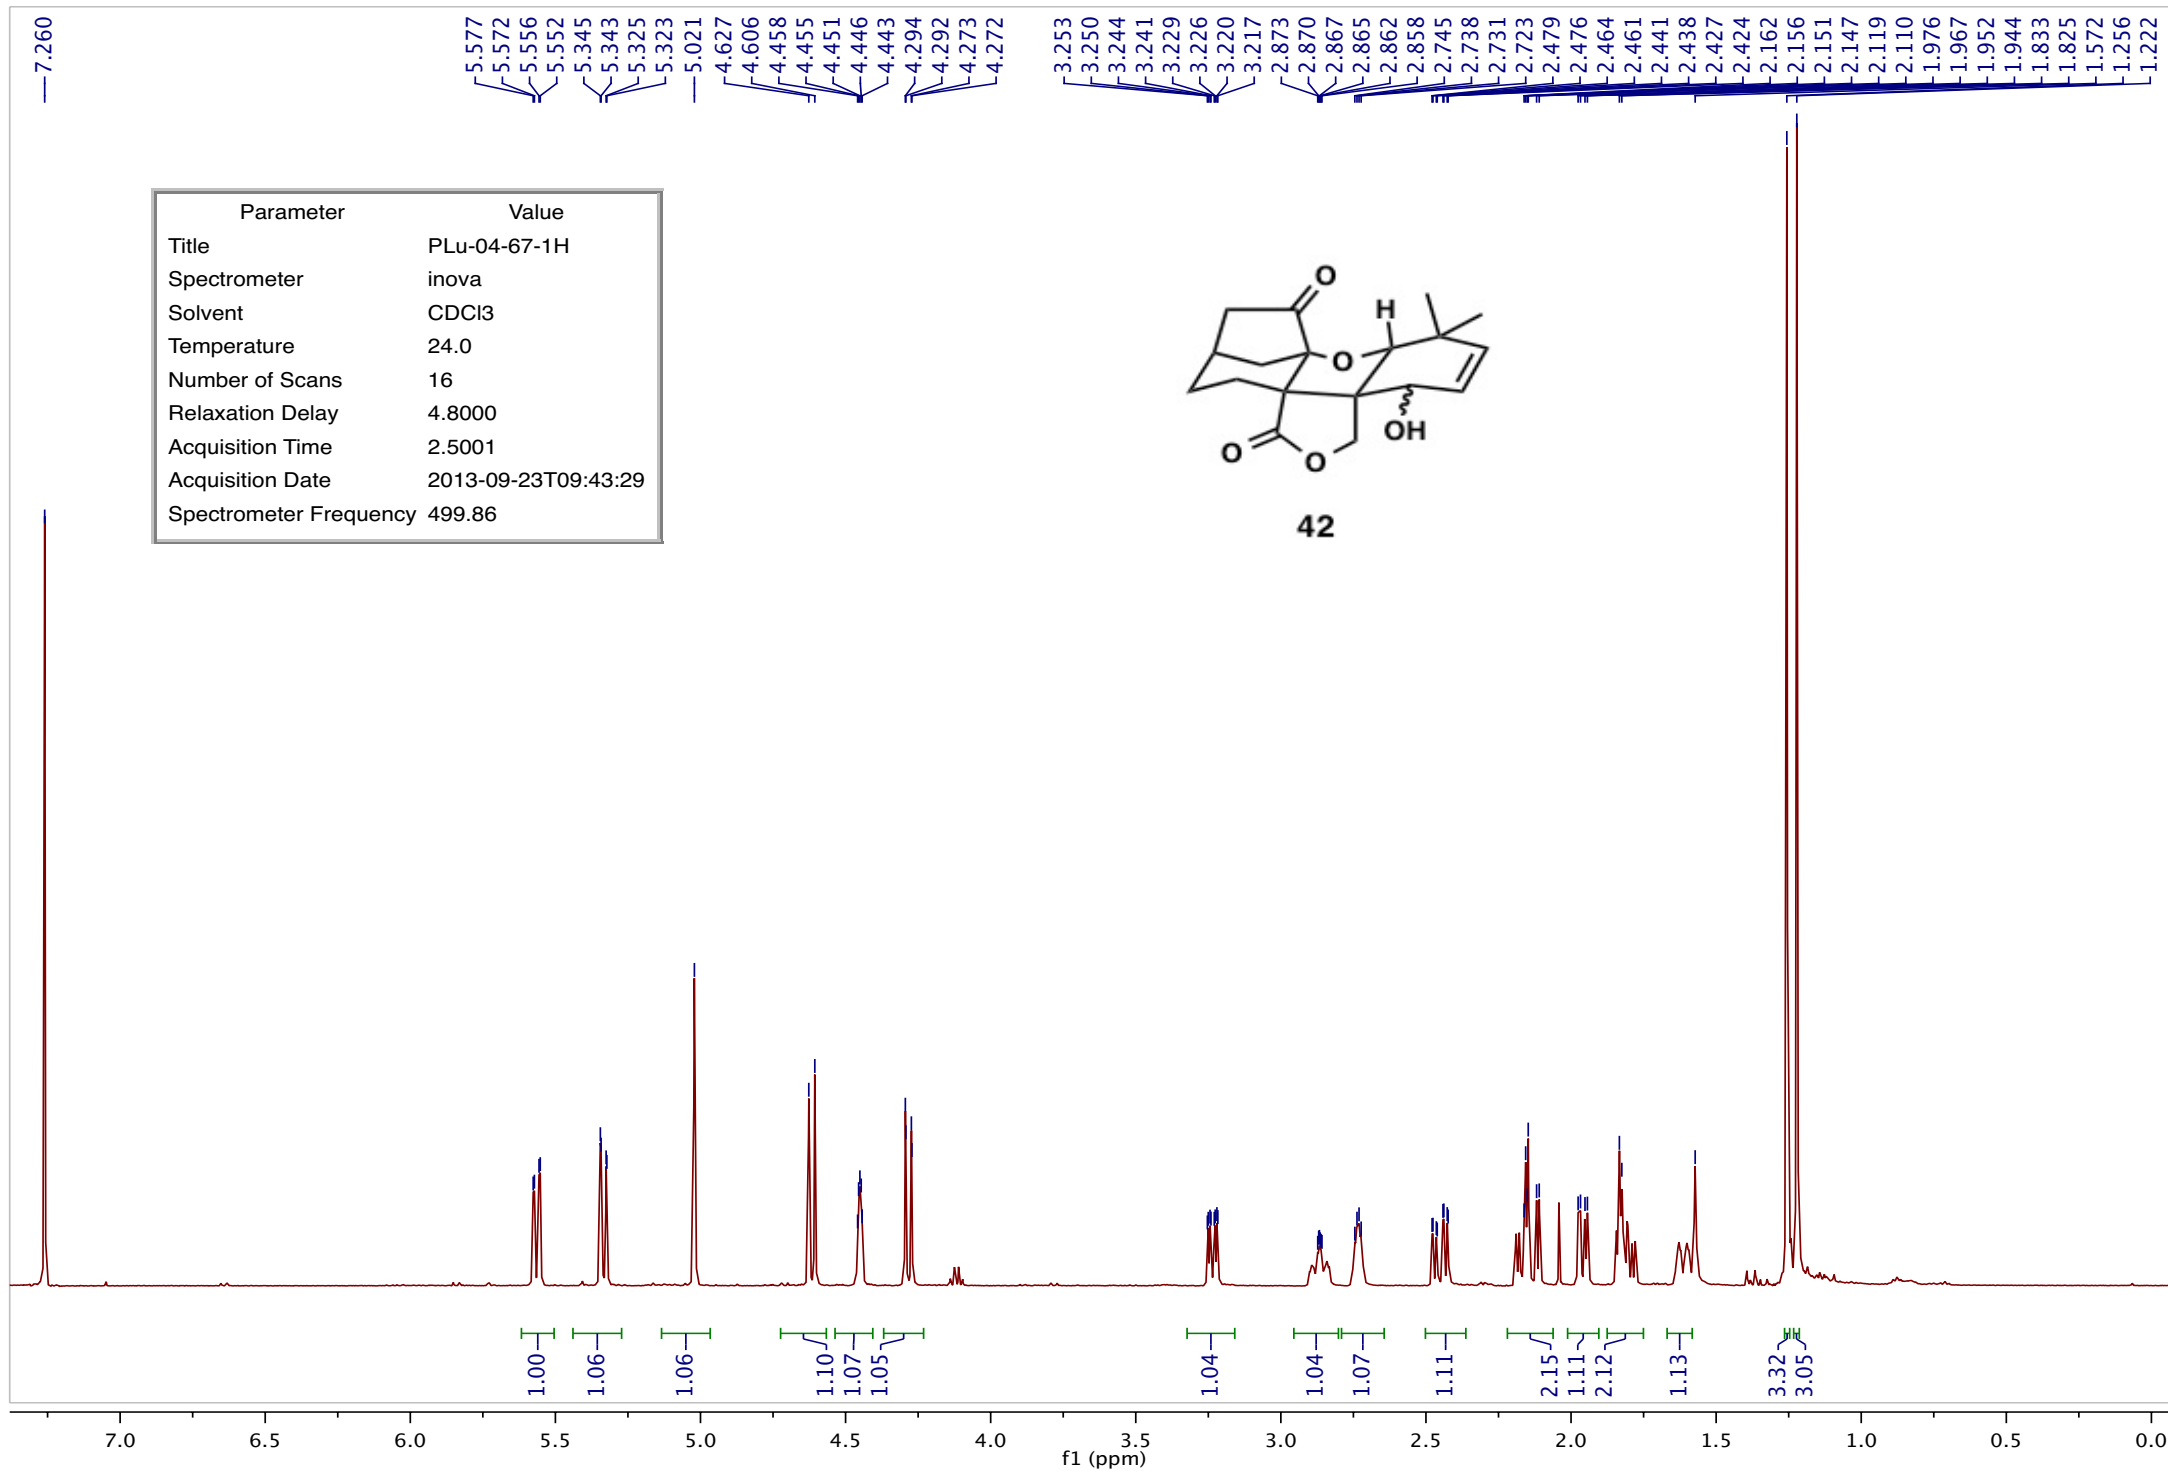

| Parameter              | Value               |
|------------------------|---------------------|
| Title                  | PLu-04-67-1H        |
| Spectrometer           | inova               |
| Solvent                | CDCl3               |
| Temperature            | 24.0                |
| Number of Scans        | 16                  |
| Relaxation Delay       | 4.8000              |
| Acquisition Time       | 2.5001              |
| Acquisition Date       | 2013-09-23T09:43:29 |
| Spectrometer Frequency | 499.86              |

7.260

5.577  
5.572  
5.556  
5.552  
5.345  
5.343  
5.325  
5.323  
5.021  
4.627  
4.606  
4.458  
4.455  
4.451  
4.446  
4.443  
4.294  
4.292  
4.273  
4.272

3.253  
3.250  
3.244  
3.241  
3.229  
3.226  
3.220  
3.217  
2.873  
2.870  
2.867  
2.865  
2.862  
2.858  
2.745  
2.738  
2.731  
2.723  
2.479  
2.476  
2.464  
2.461  
2.441  
2.438  
2.427  
2.424  
2.162  
2.156  
2.151  
2.147  
2.119  
2.110  
1.976  
1.967  
1.952  
1.944  
1.833  
1.825  
1.572  
1.256  
1.222

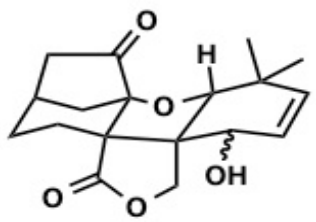

42

1.00  
1.06  
1.06

1.10  
1.07  
1.05

1.04  
1.04  
1.07

1.11  
2.15  
1.11  
2.12

1.13

3.32  
3.05

7.0 6.5 6.0 5.5 5.0 4.5 4.0 f1 (ppm) 3.5 3.0 2.5 2.0 1.5 1.0 0.5 0.0

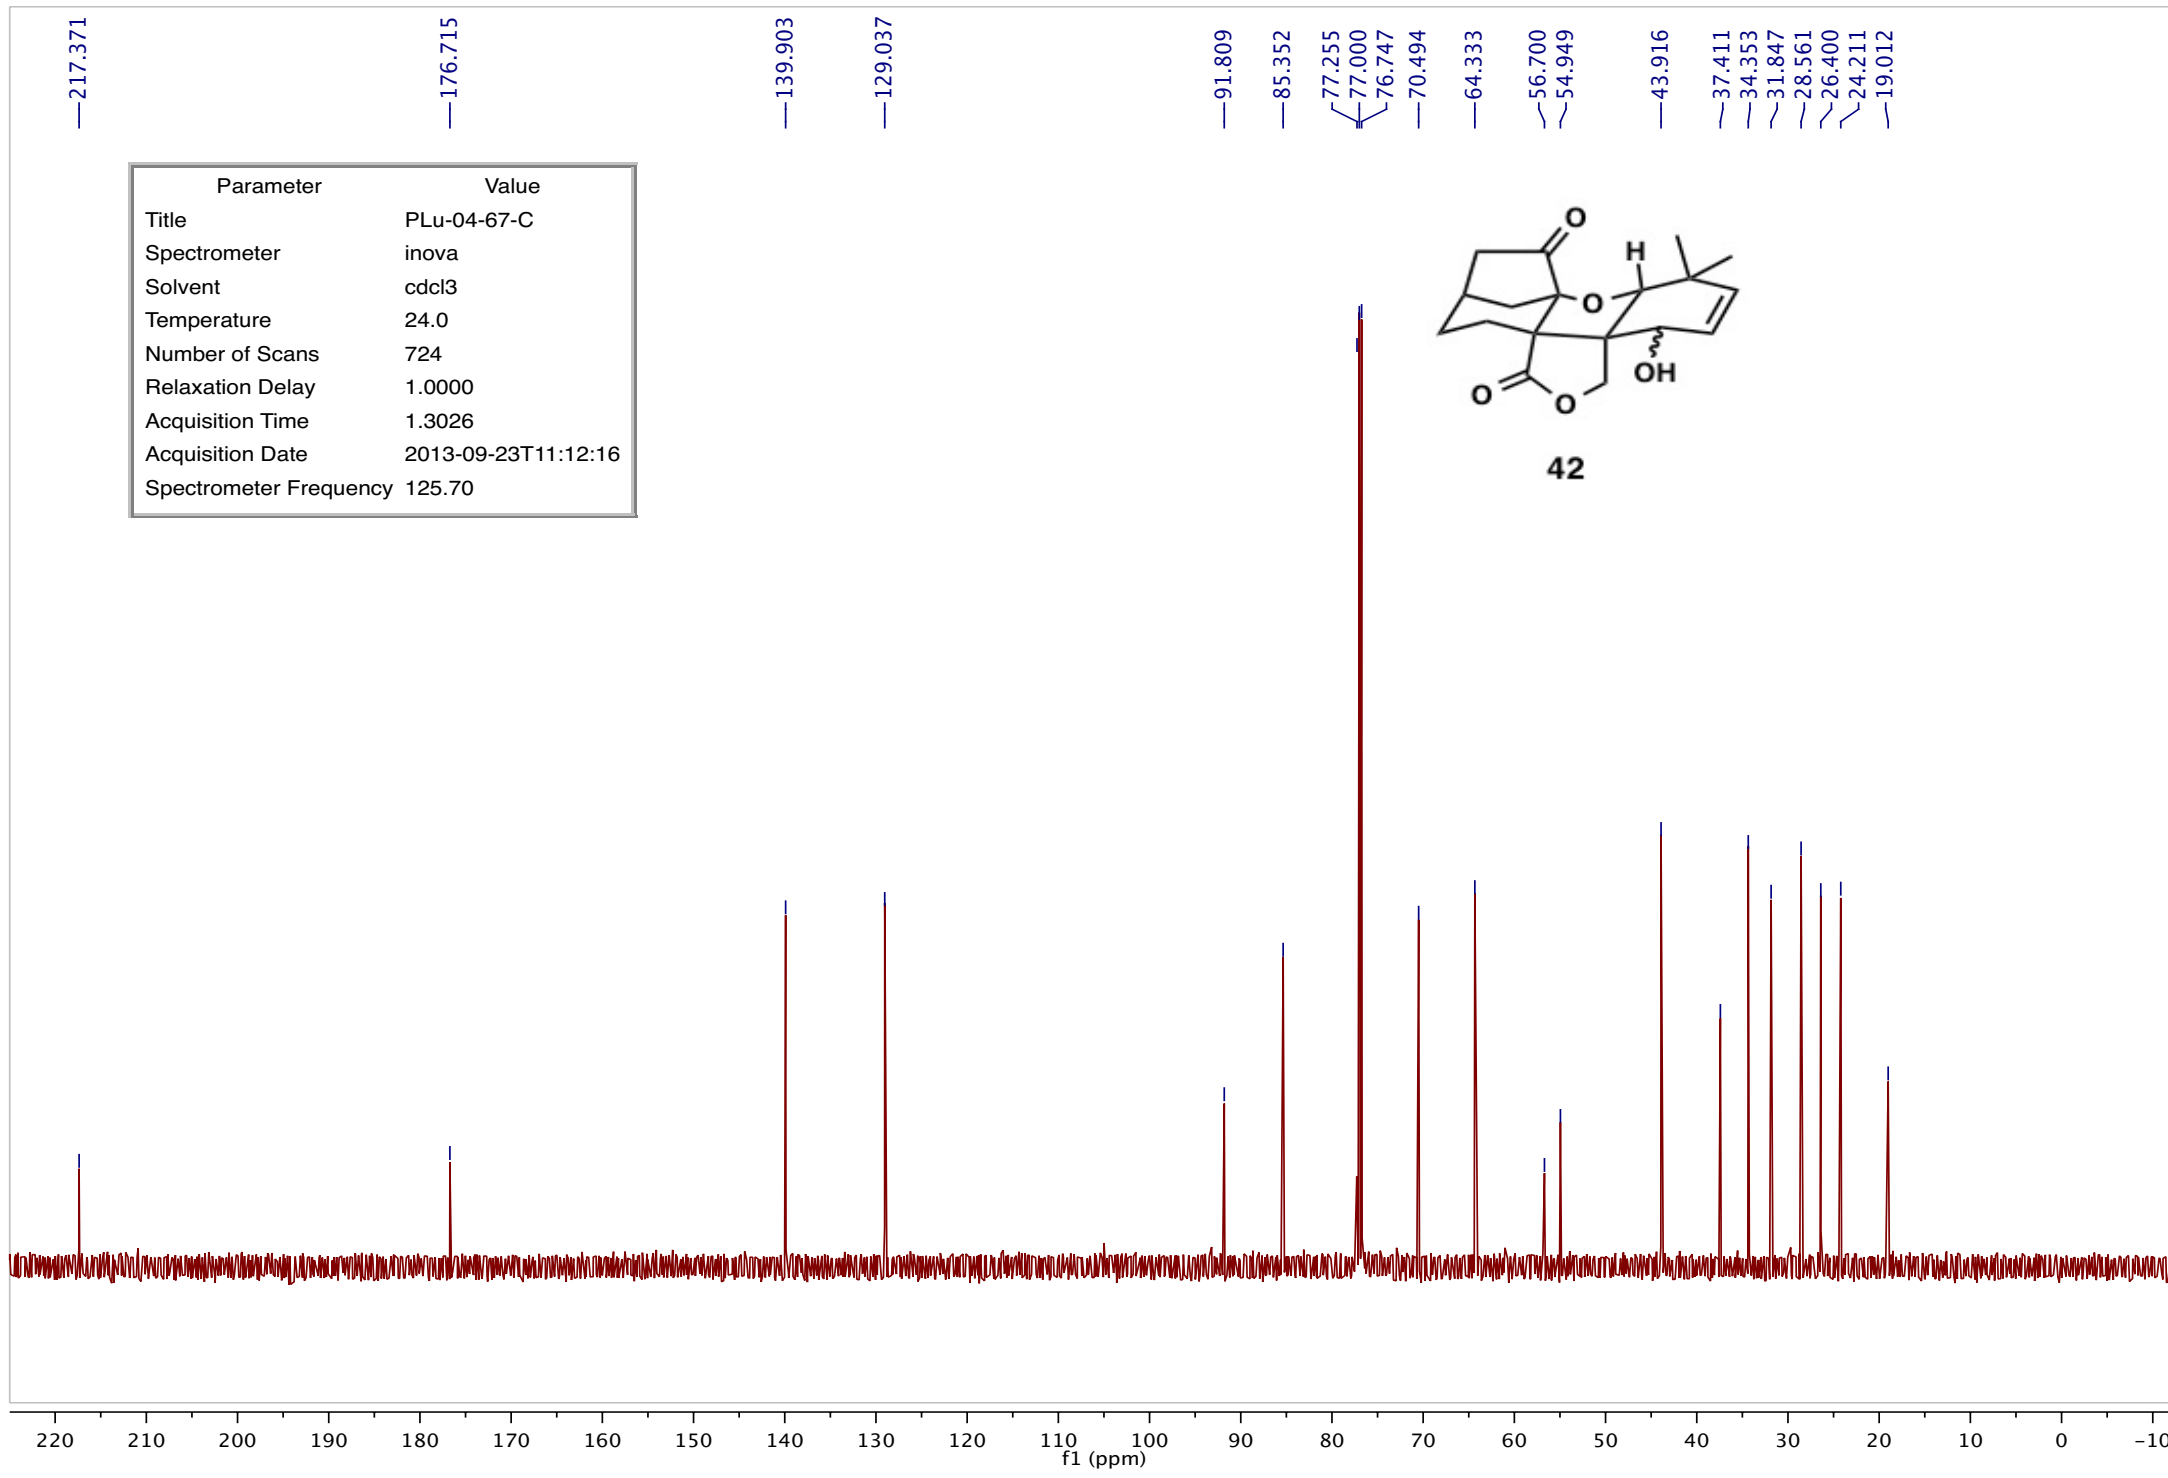

| Parameter              | Value               |
|------------------------|---------------------|
| Title                  | PLu-04-67-C         |
| Spectrometer           | inova               |
| Solvent                | cdcl3               |
| Temperature            | 24.0                |
| Number of Scans        | 724                 |
| Relaxation Delay       | 1.0000              |
| Acquisition Time       | 1.3026              |
| Acquisition Date       | 2013-09-23T11:12:16 |
| Spectrometer Frequency | 125.70              |

—217.371

—176.715

—139.903

—129.037

—91.809

—85.352

77.255

77.000

76.747

—70.494

—64.333

~56.700

~54.949

—43.916

~37.411

~34.353

~31.847

~28.561

~26.400

~24.211

~19.012

220 210 200 190 180 170 160 150 140 130 120 110 100 90 80 70 60 50 40 30 20 10 0 -10  
f1 (ppm)



| Parameter              | Value               |
|------------------------|---------------------|
| Title                  | PLu-04-68-H         |
| Spectrometer           | inova               |
| Solvent                | CDCl3               |
| Temperature            | 24.0                |
| Number of Scans        | 16                  |
| Relaxation Delay       | 4.8000              |
| Acquisition Time       | 2.5001              |
| Acquisition Date       | 2013-09-24T09:10:02 |
| Spectrometer Frequency | 499.86              |

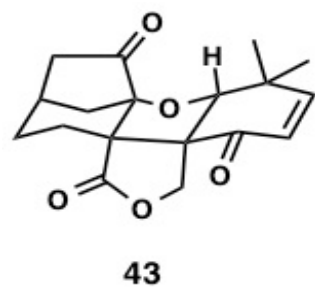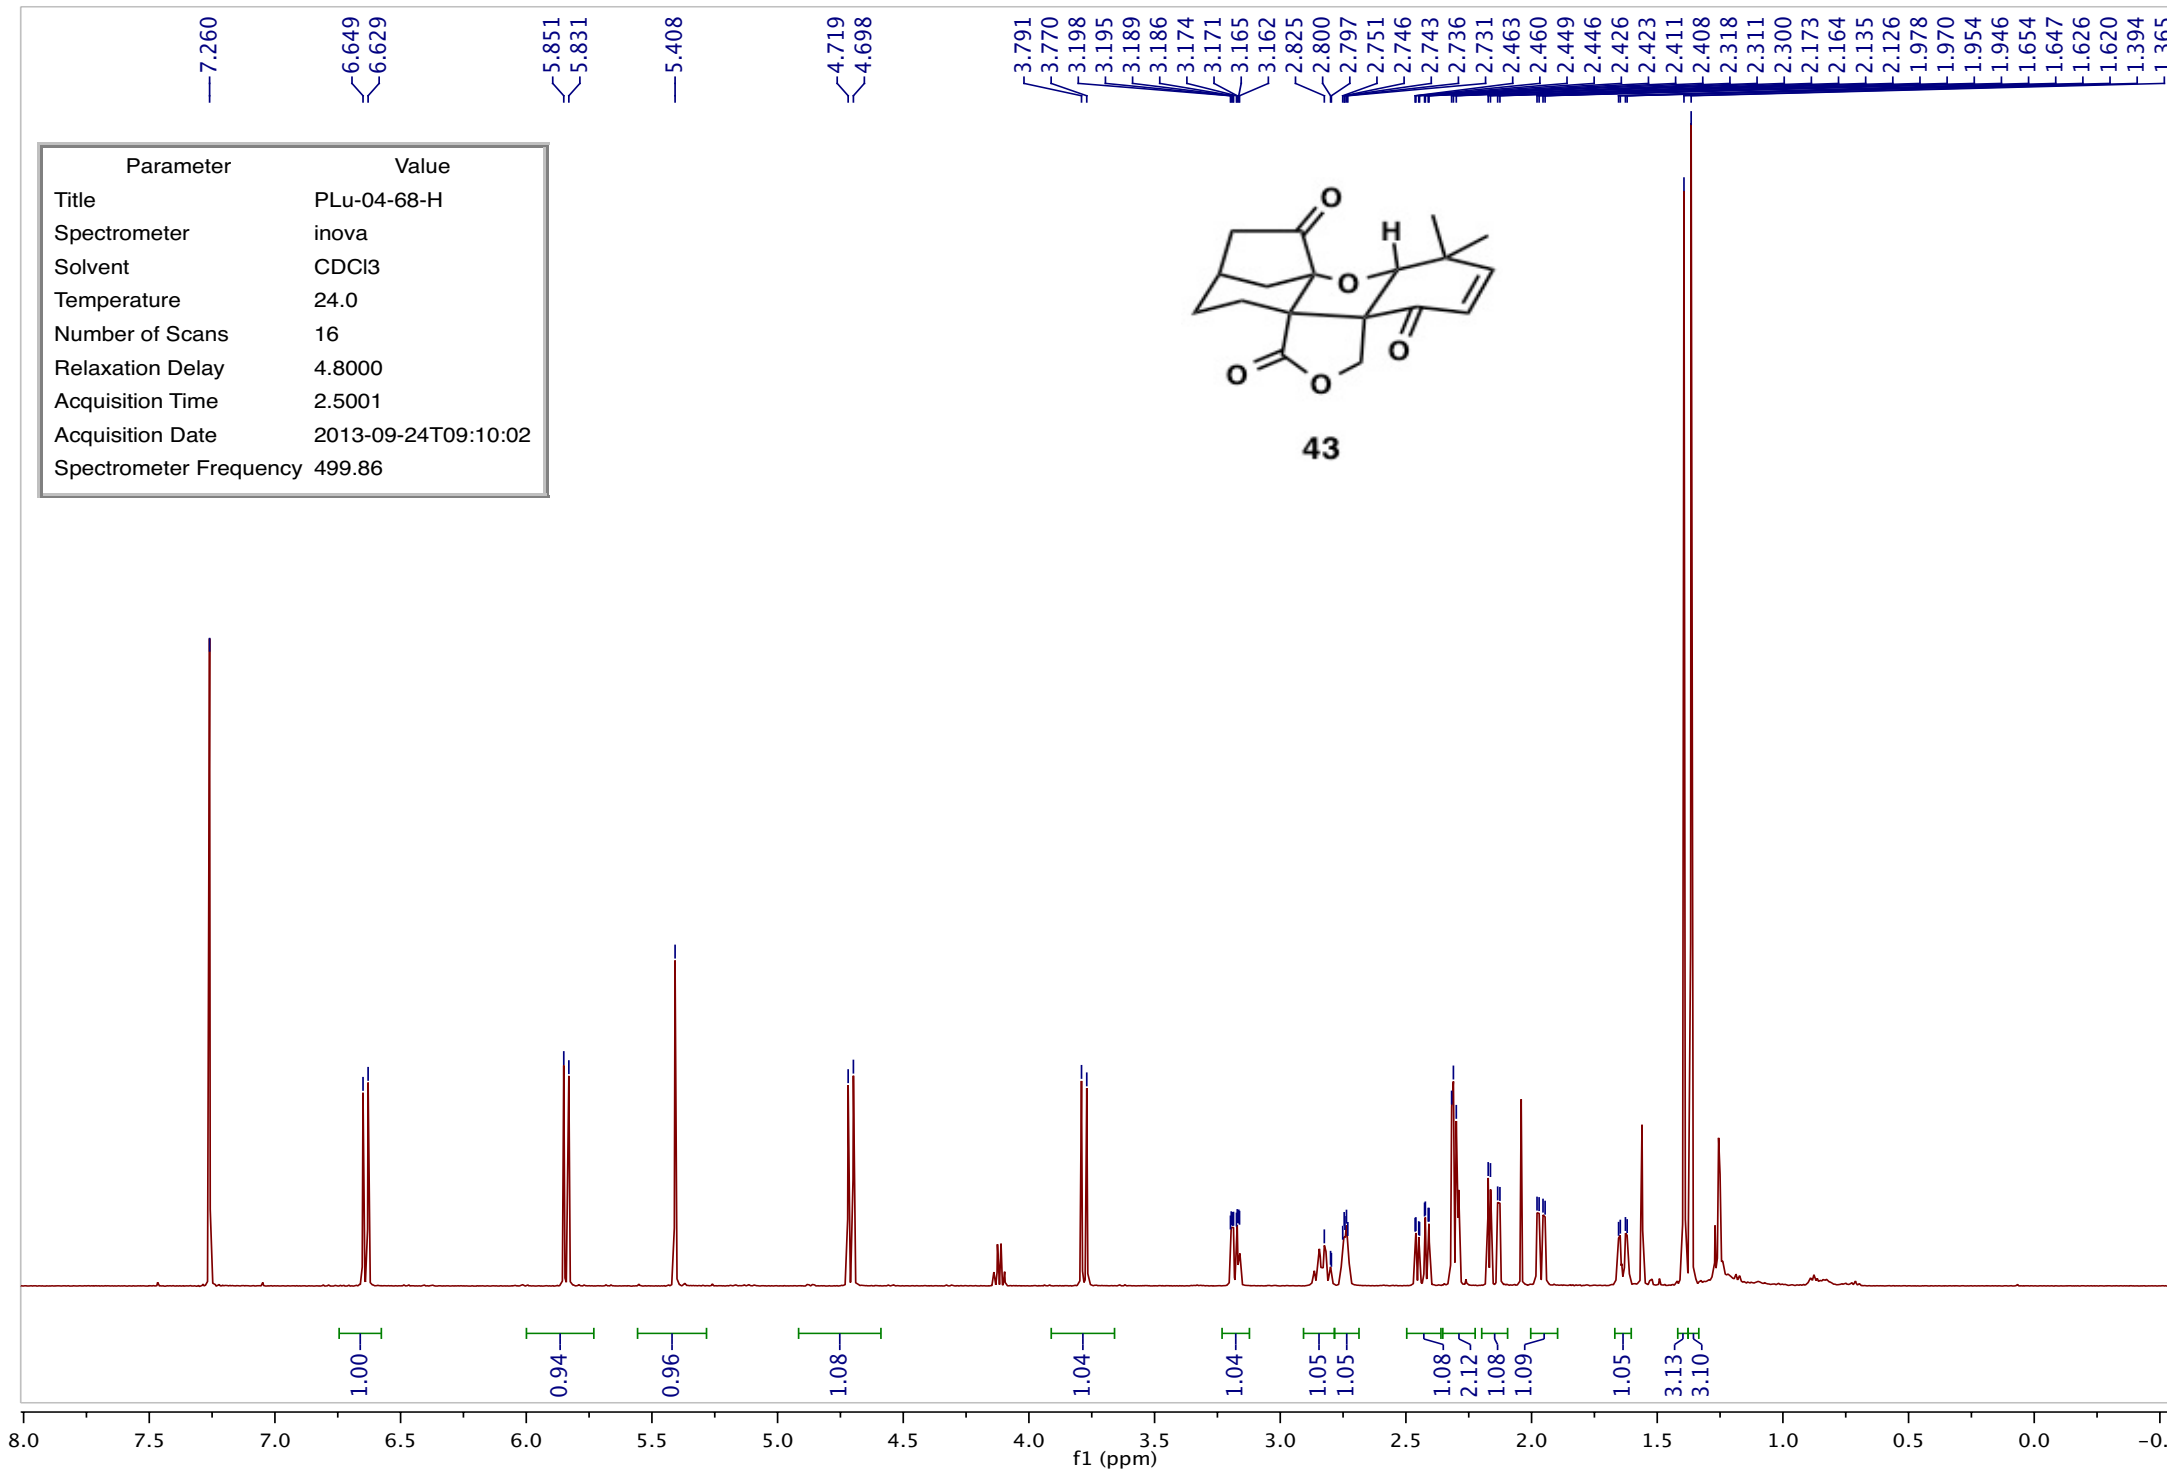

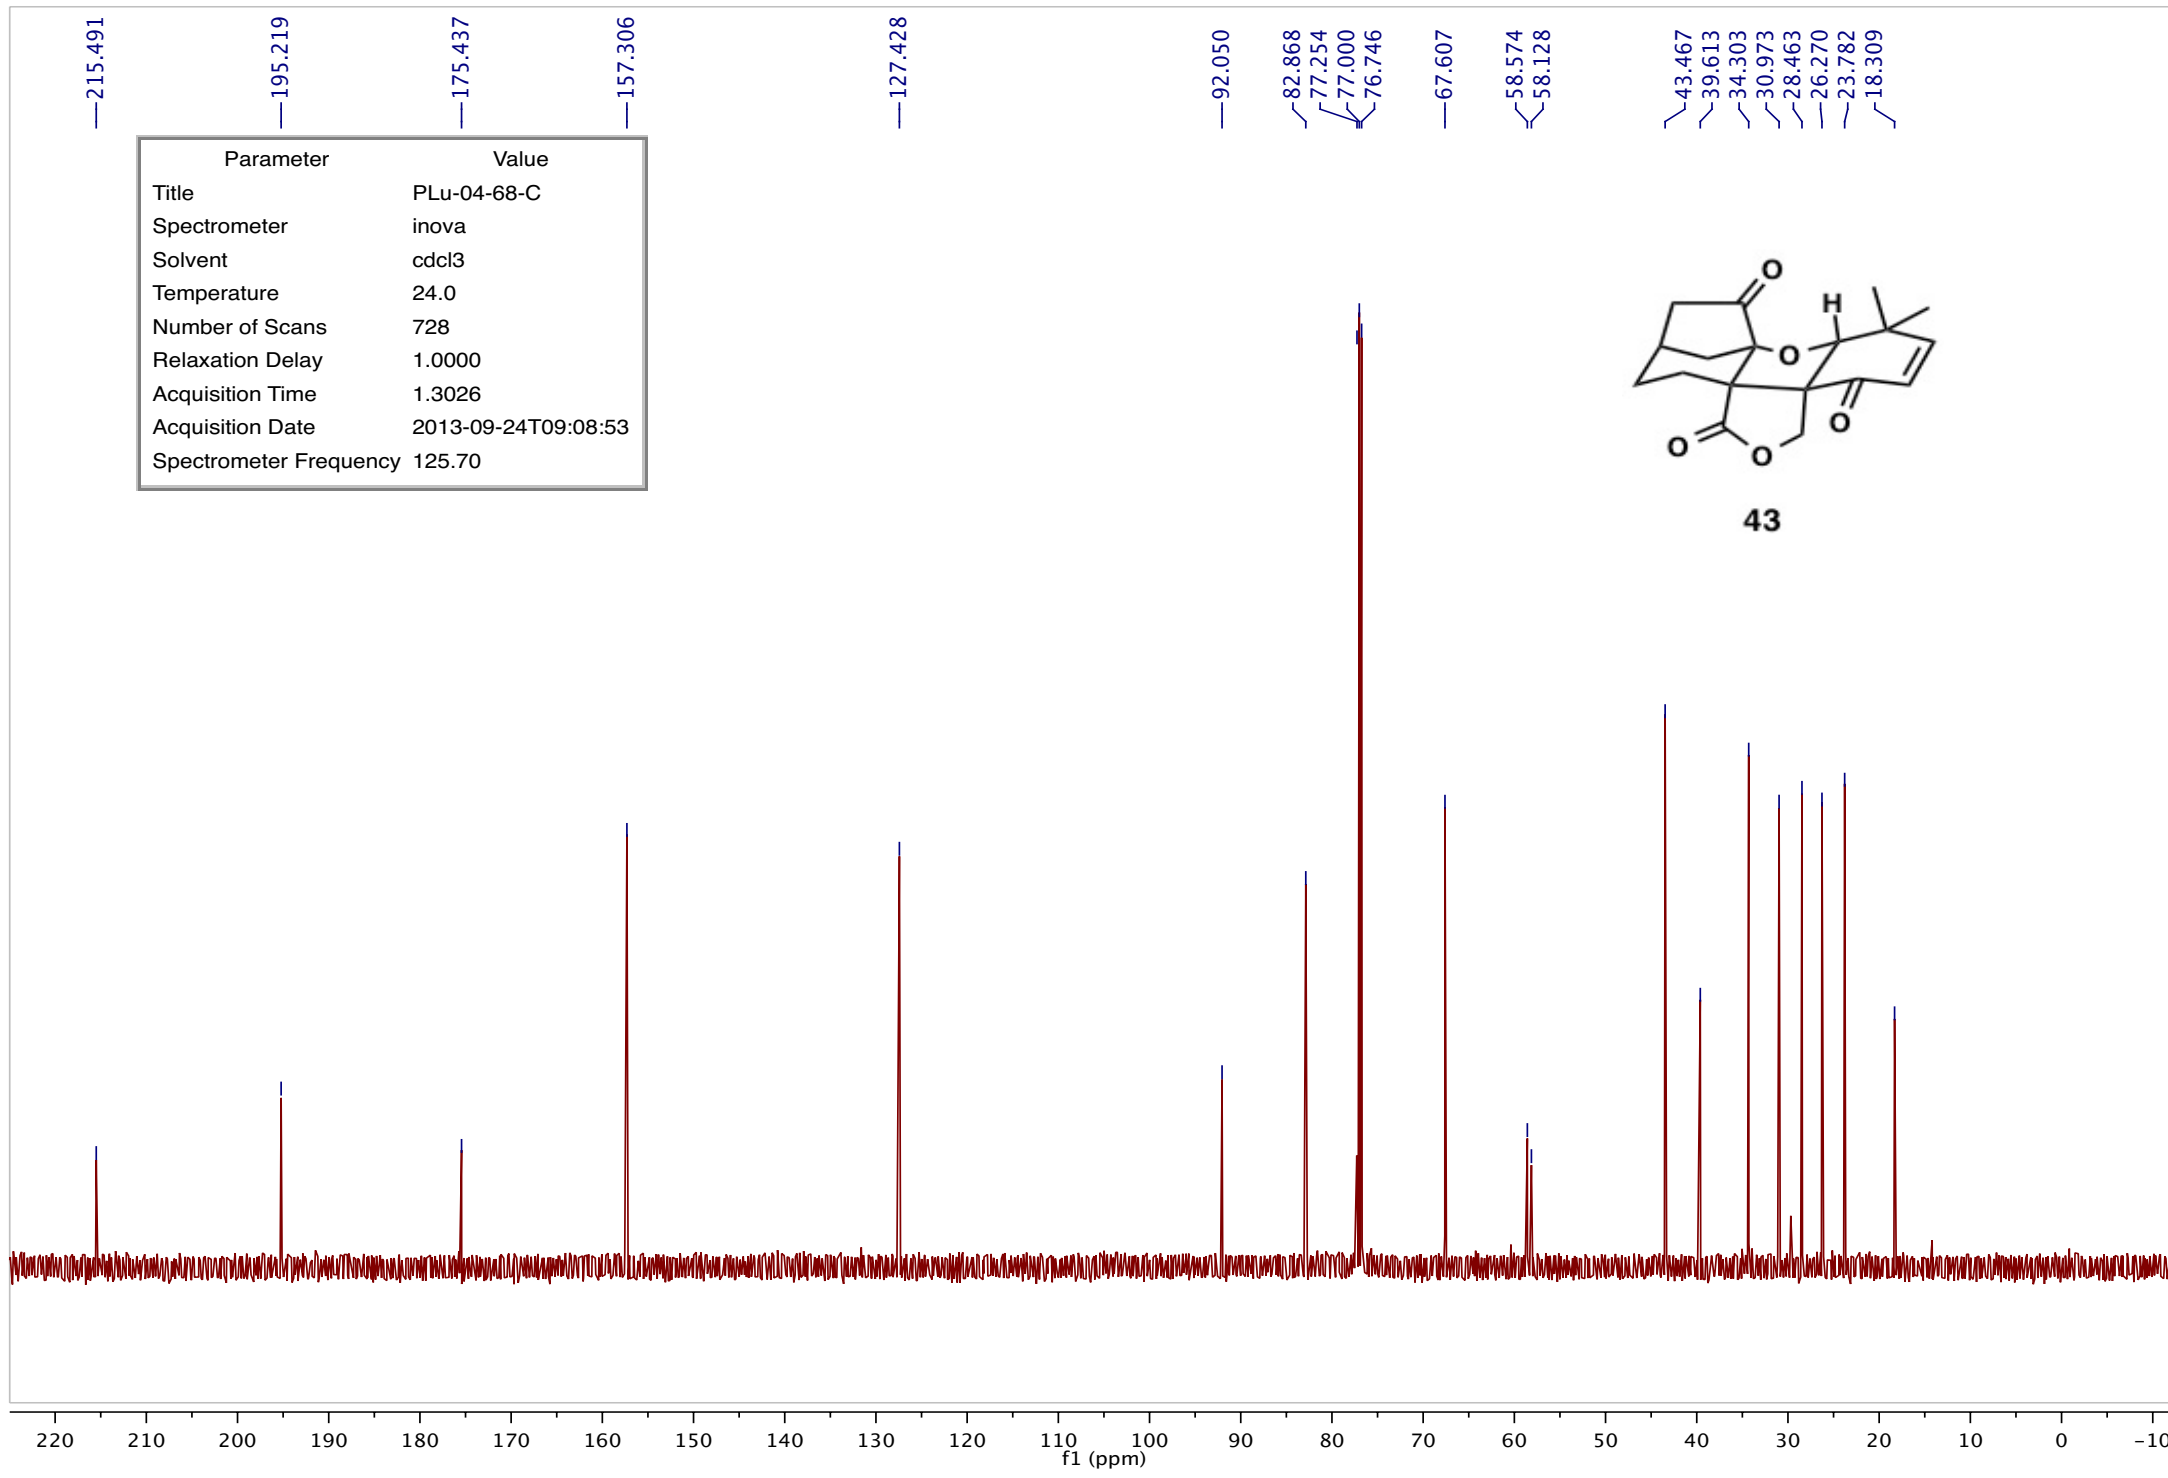

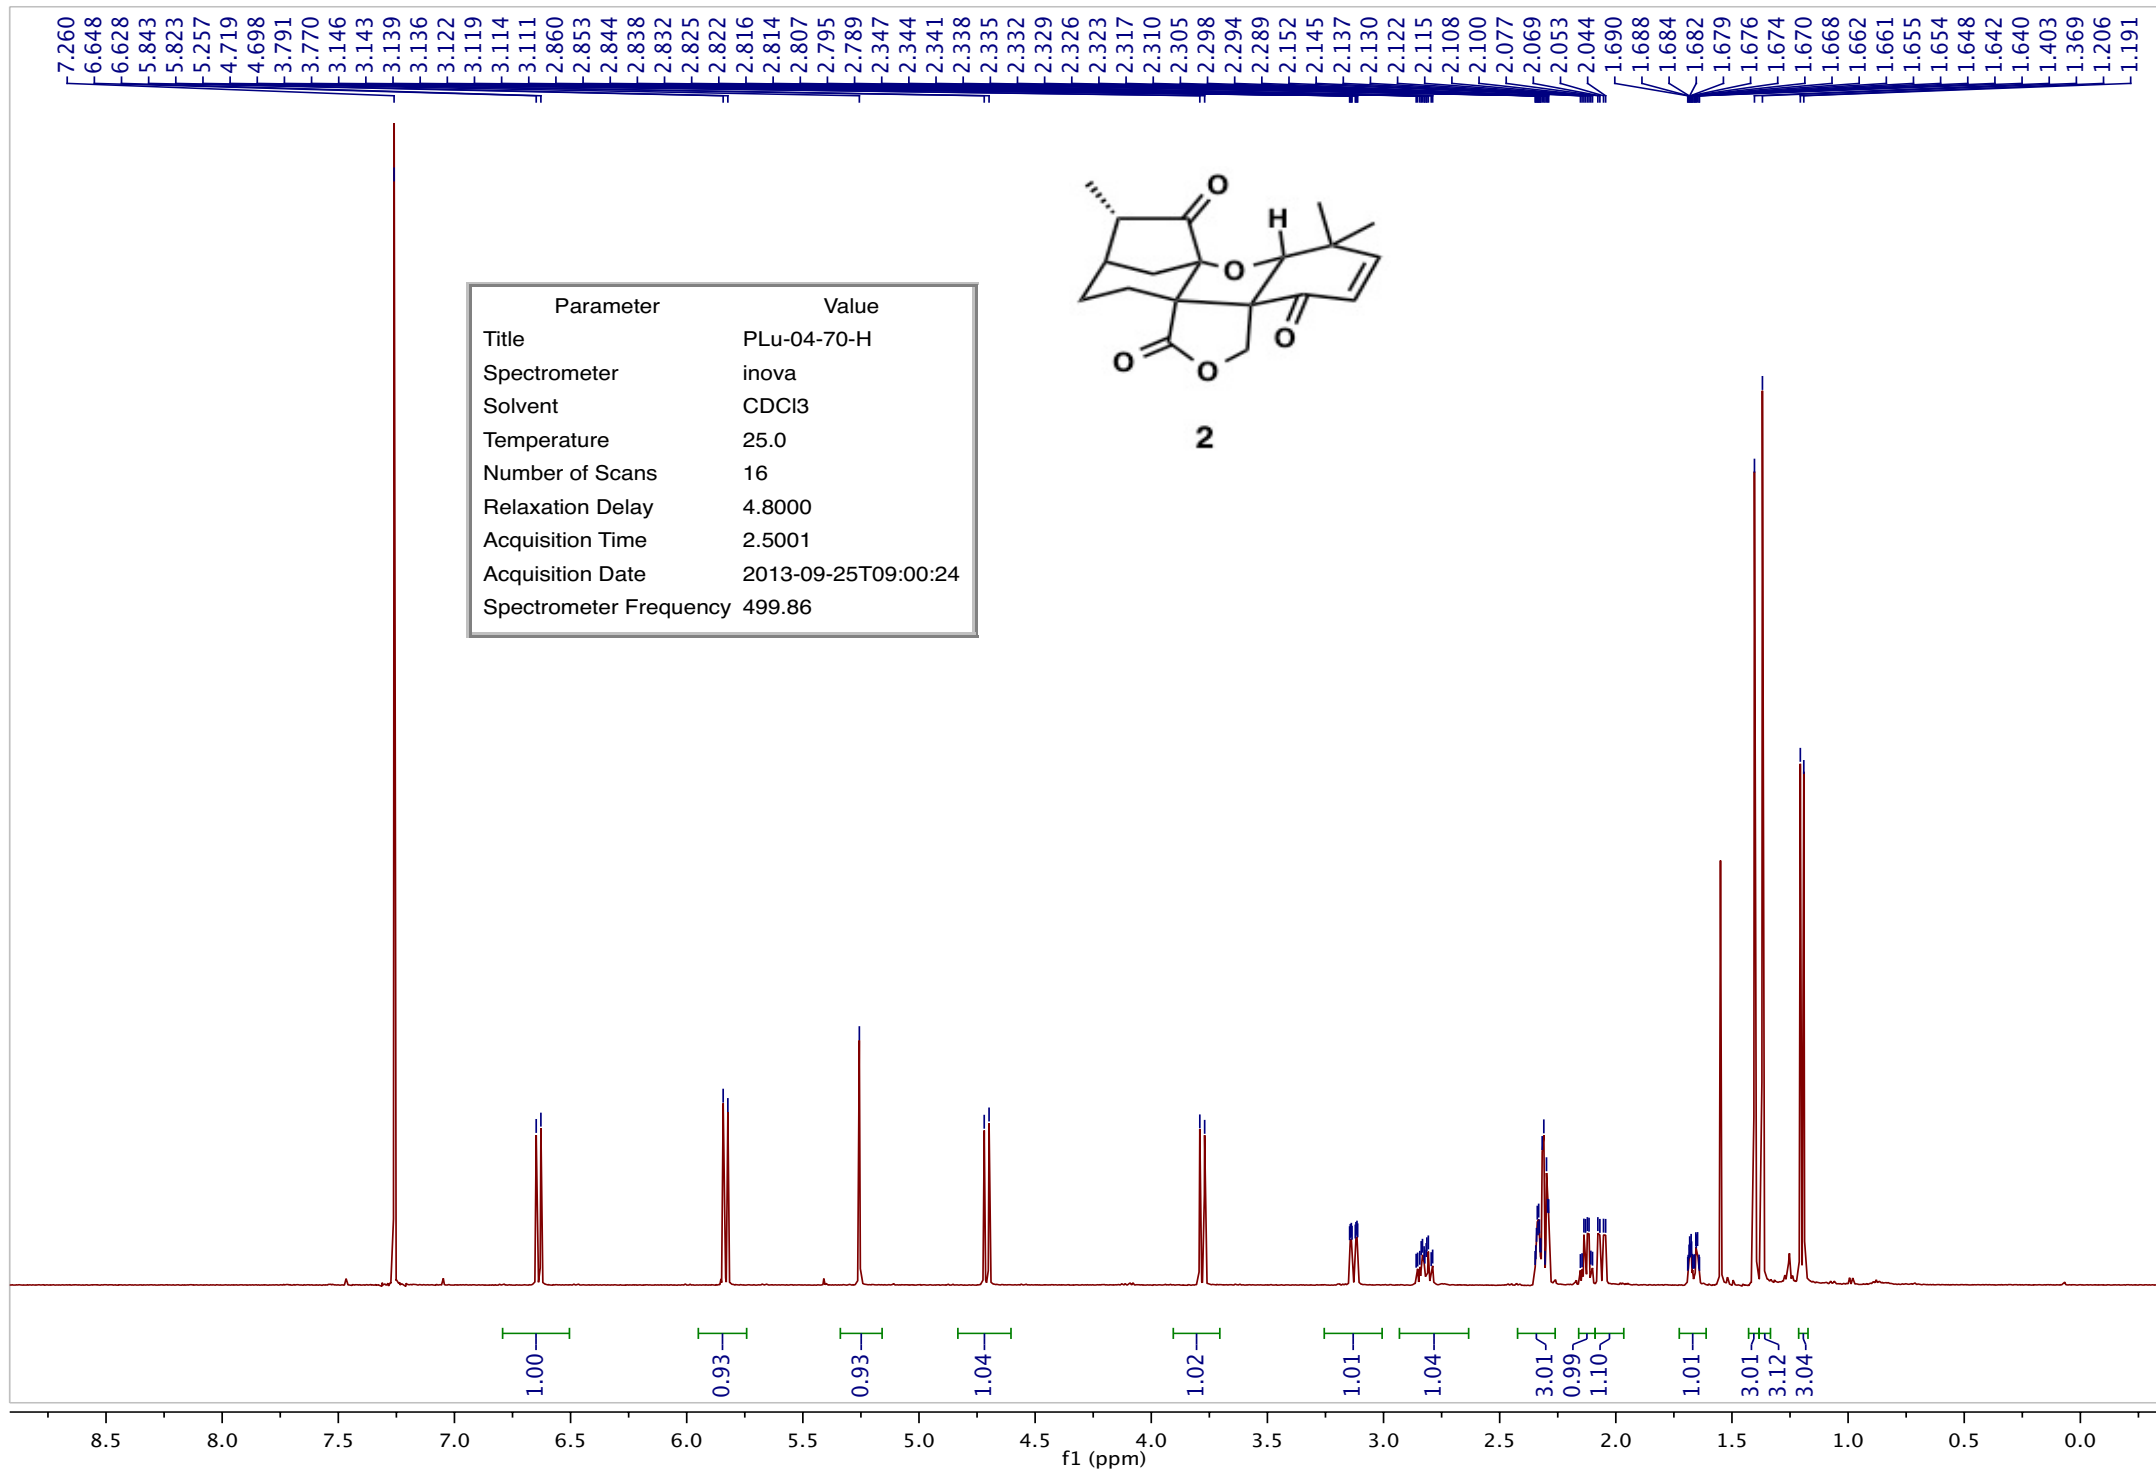

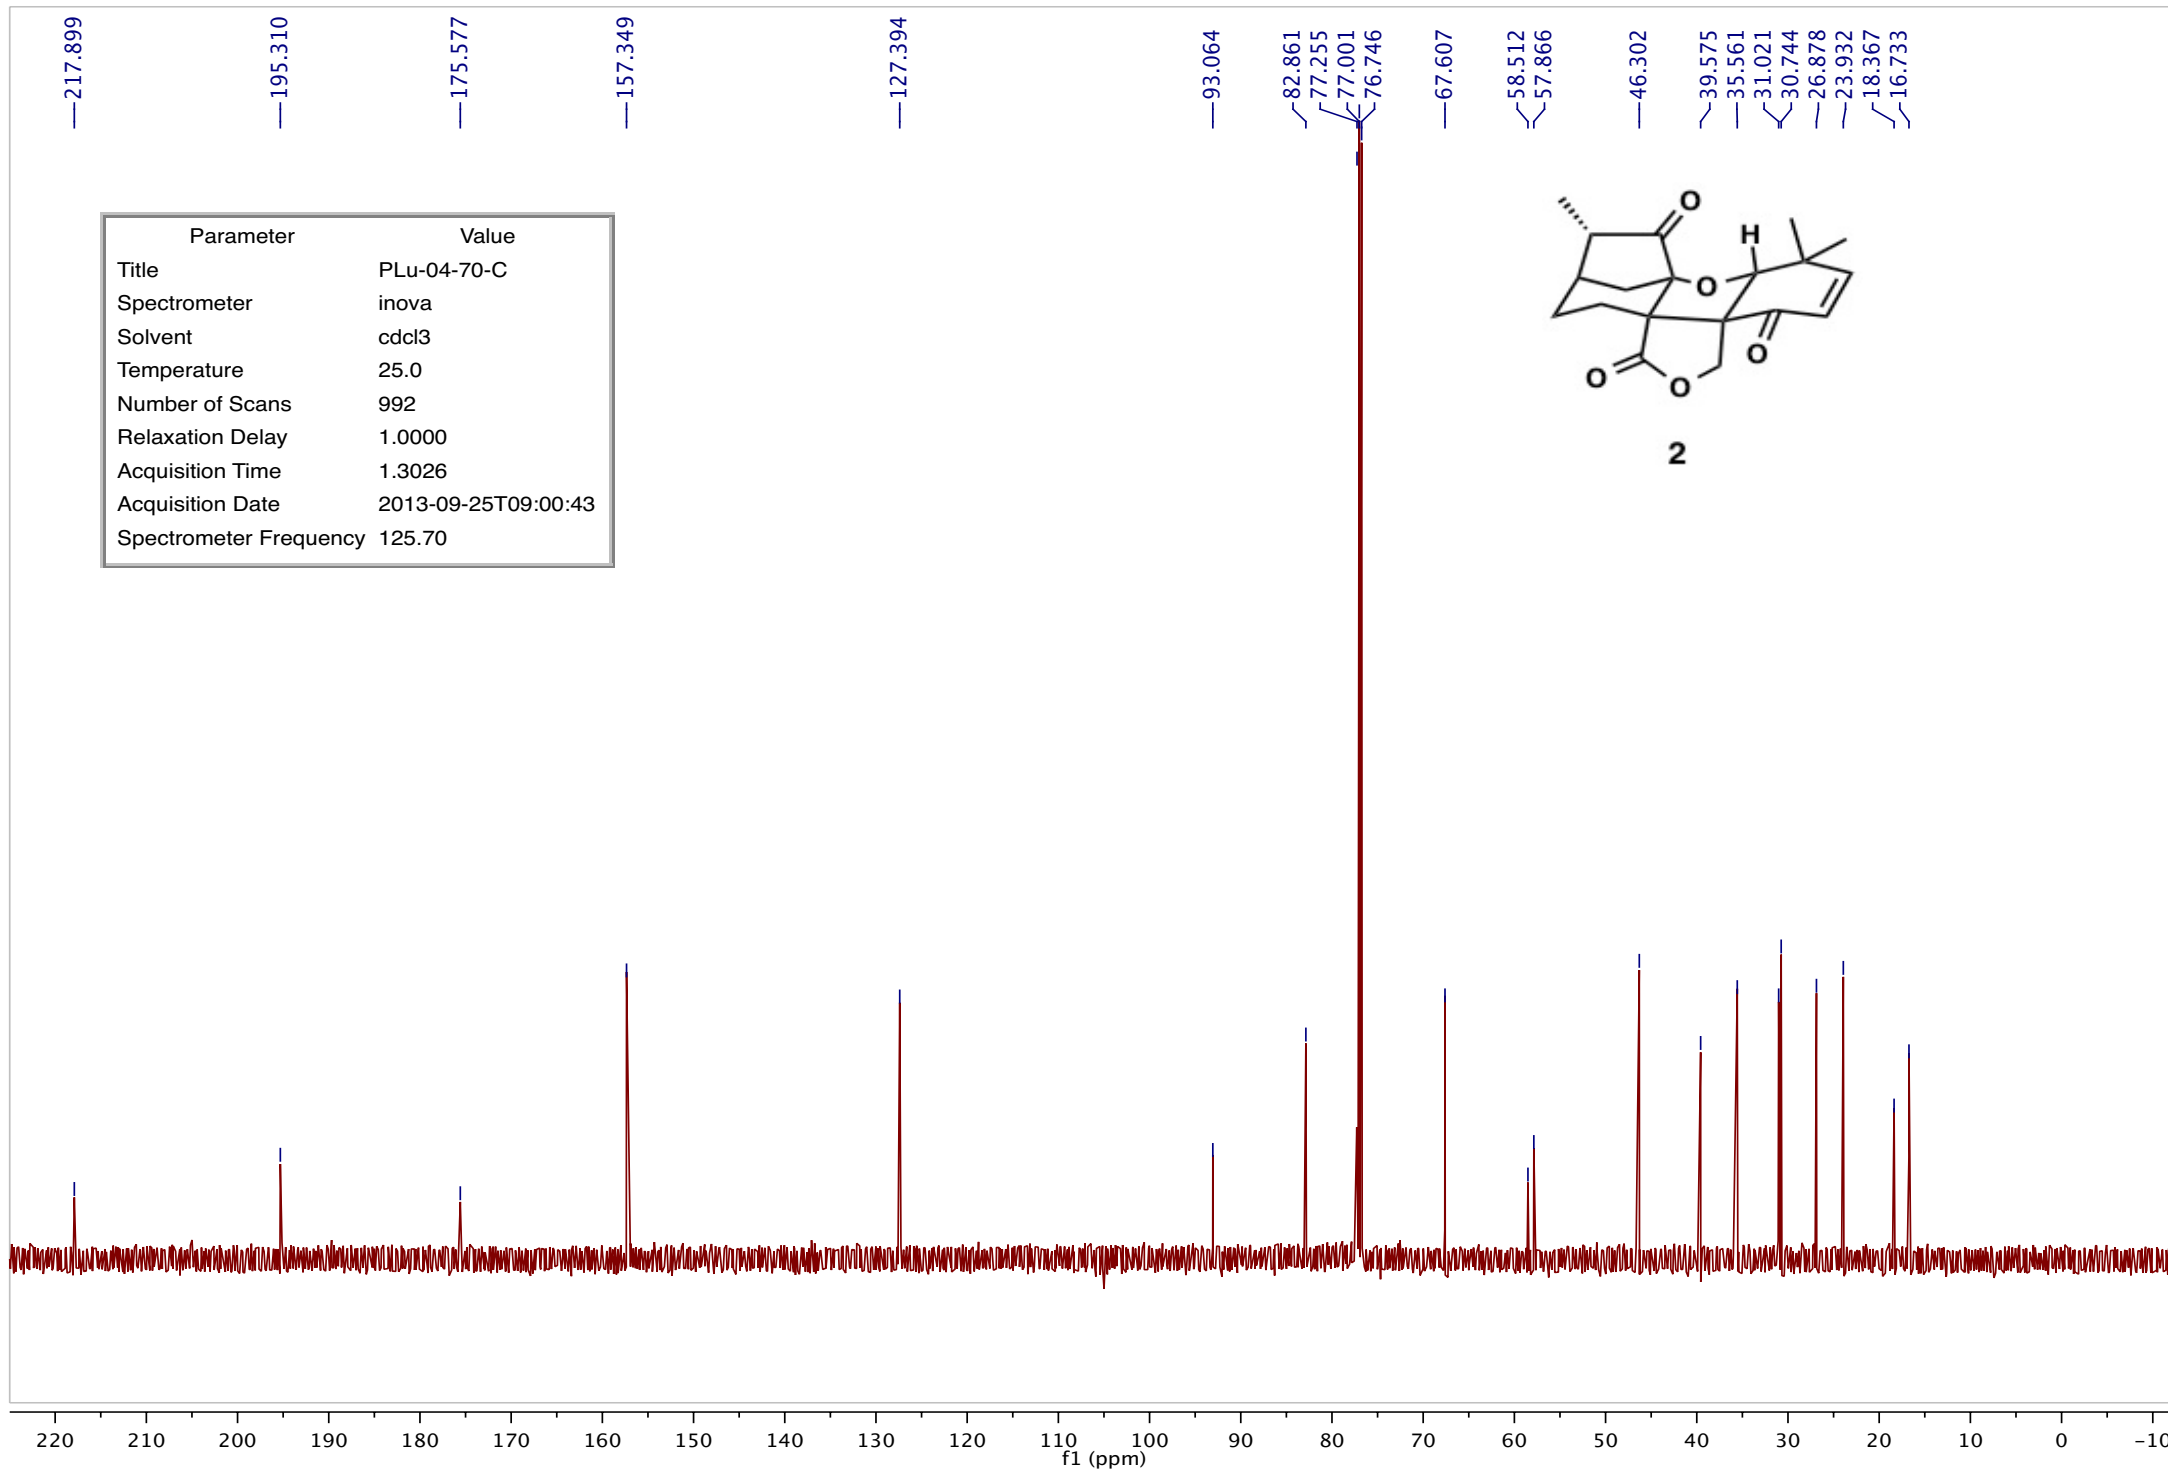

| Parameter              | Value               |
|------------------------|---------------------|
| Title                  | PLu-04-70-C         |
| Spectrometer           | inova               |
| Solvent                | cdcl3               |
| Temperature            | 25.0                |
| Number of Scans        | 992                 |
| Relaxation Delay       | 1.0000              |
| Acquisition Time       | 1.3026              |
| Acquisition Date       | 2013-09-25T09:00:43 |
| Spectrometer Frequency | 125.70              |

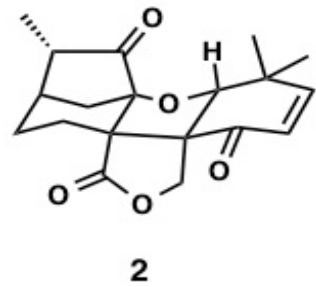

7.370  
7.359  
7.340  
7.328  
7.315  
7.286  
7.274  
7.260  
7.197  
7.183  
6.860  
6.846

4.623  
4.604  
4.465  
4.446  
4.337  
4.337  
4.158  
3.859  
3.852  
3.840  
3.833  
3.797  
3.742  
3.732  
3.723  
3.713  
3.609  
3.594  
3.578  
3.563

3.281  
3.265  
3.260  
3.245  
3.052  
3.045  
2.853  
2.691  
2.682  
2.588  
2.580  
2.559  
2.551  
2.347  
2.335  
2.316  
2.304  
2.181  
2.175  
2.150  
2.145  
2.017  
2.014  
2.014  
1.988  
1.985  
1.931  
1.923  
1.920  
1.911  
1.904  
1.664  
1.659  
1.645  
1.639  
1.625  
1.075

| Parameter              | Value               |
|------------------------|---------------------|
| Title                  | PLu-03-149-2H       |
| Spectrometer           | inova               |
| Solvent                | cdcl3               |
| Temperature            | 25.0                |
| Number of Scans        | 12                  |
| Relaxation Delay       | 4.8000              |
| Acquisition Date       | 2013-06-04T19:11:30 |
| Spectrometer Frequency | 599.64              |

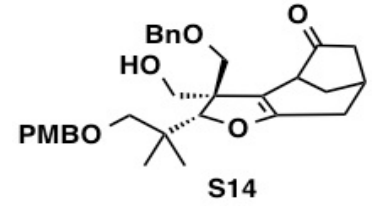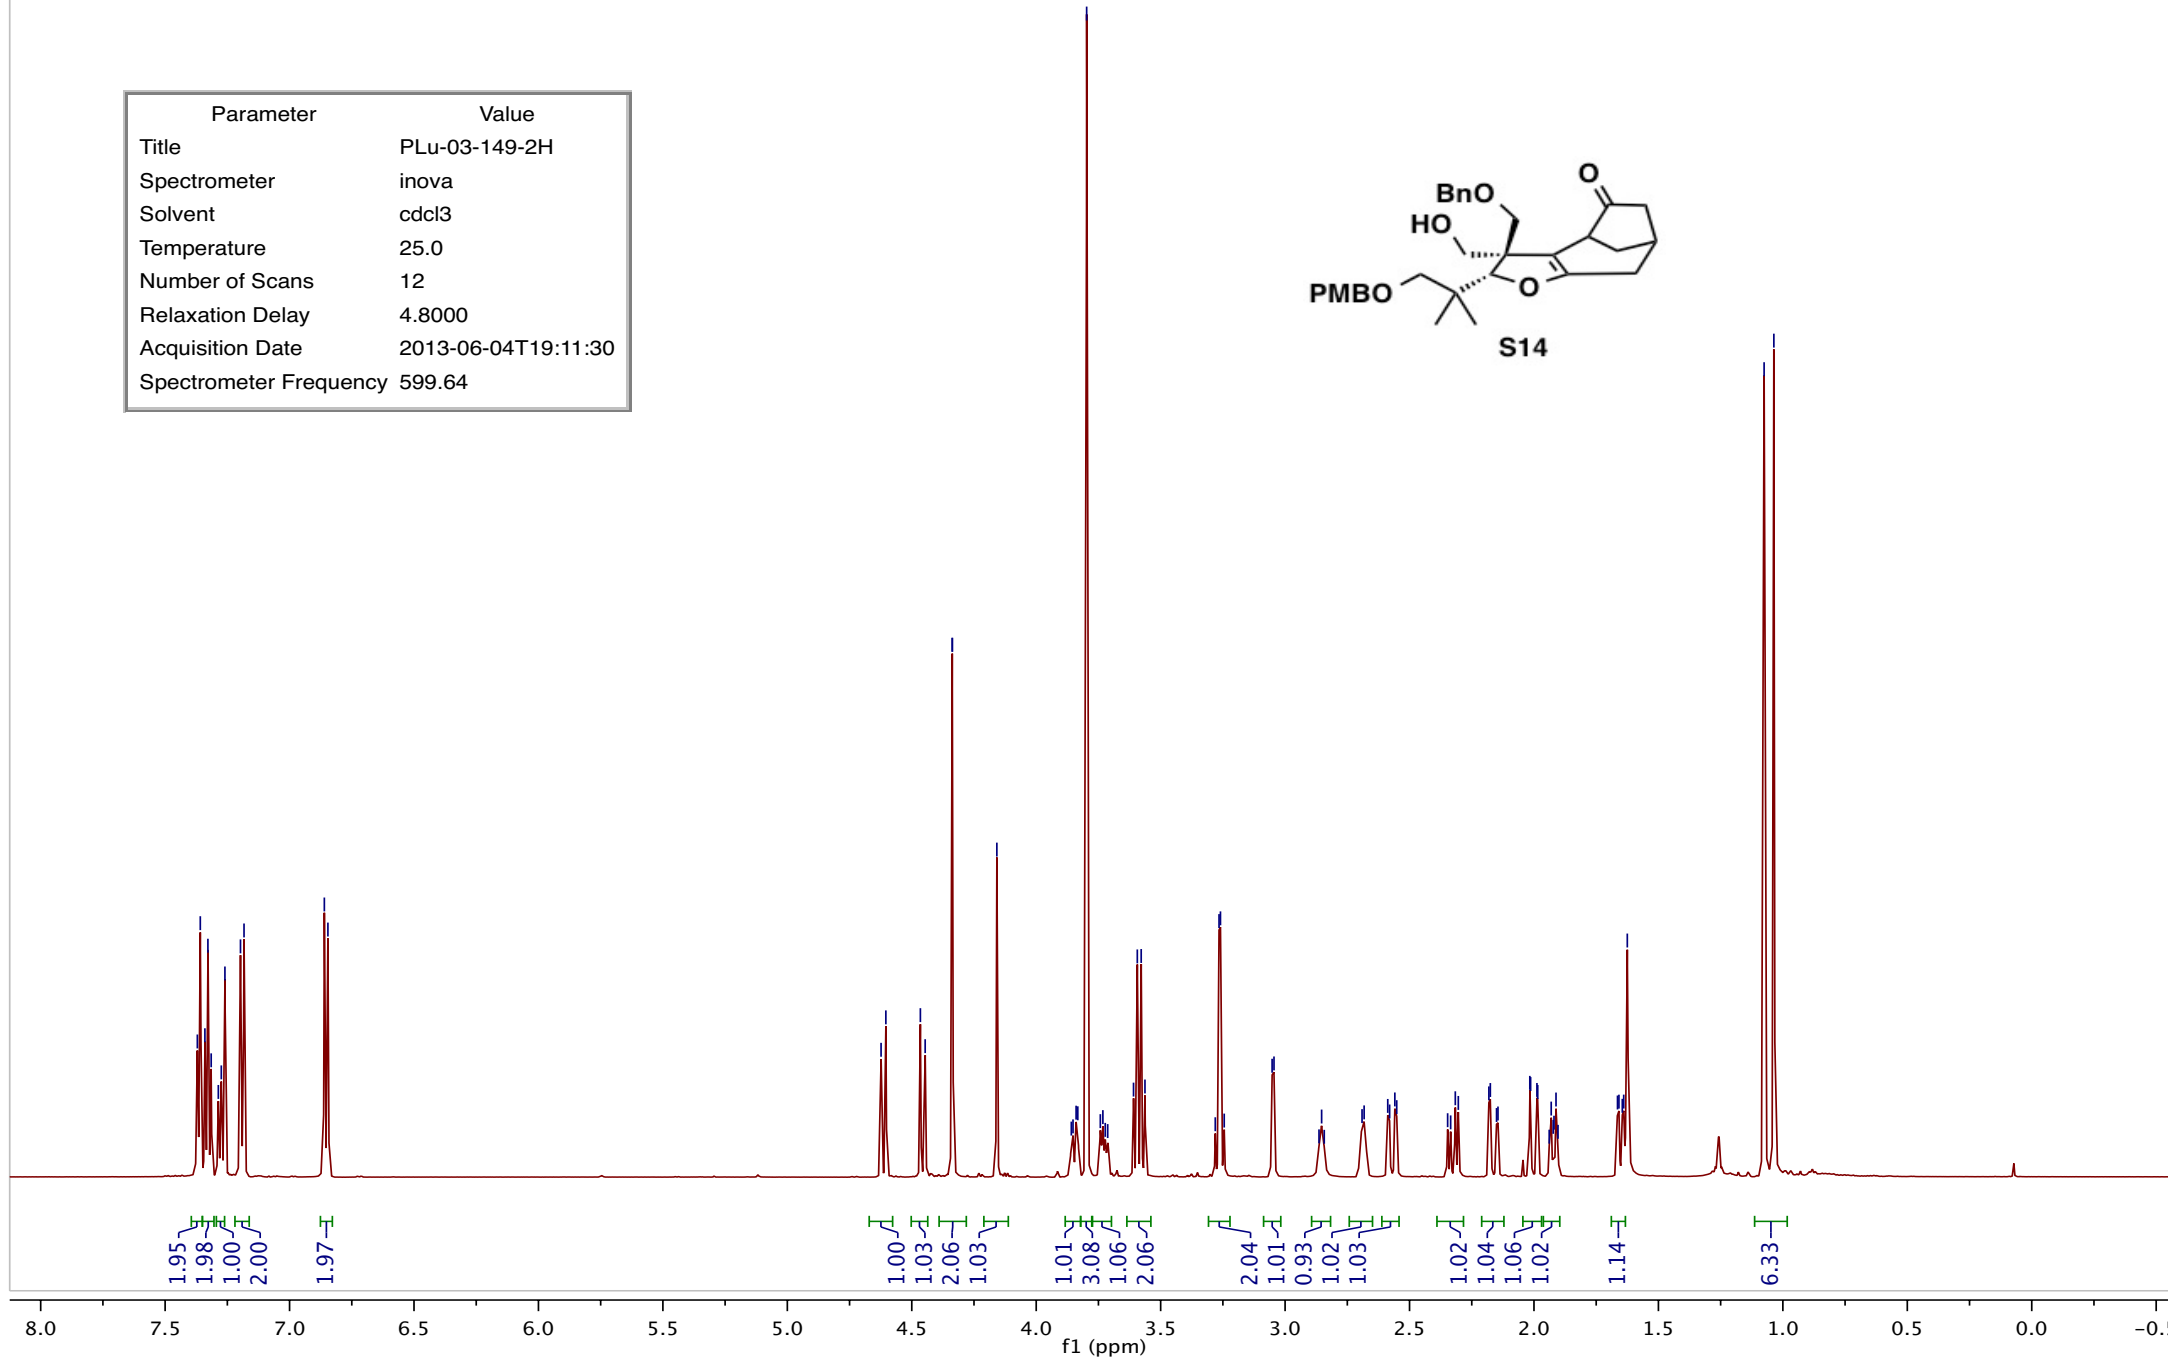

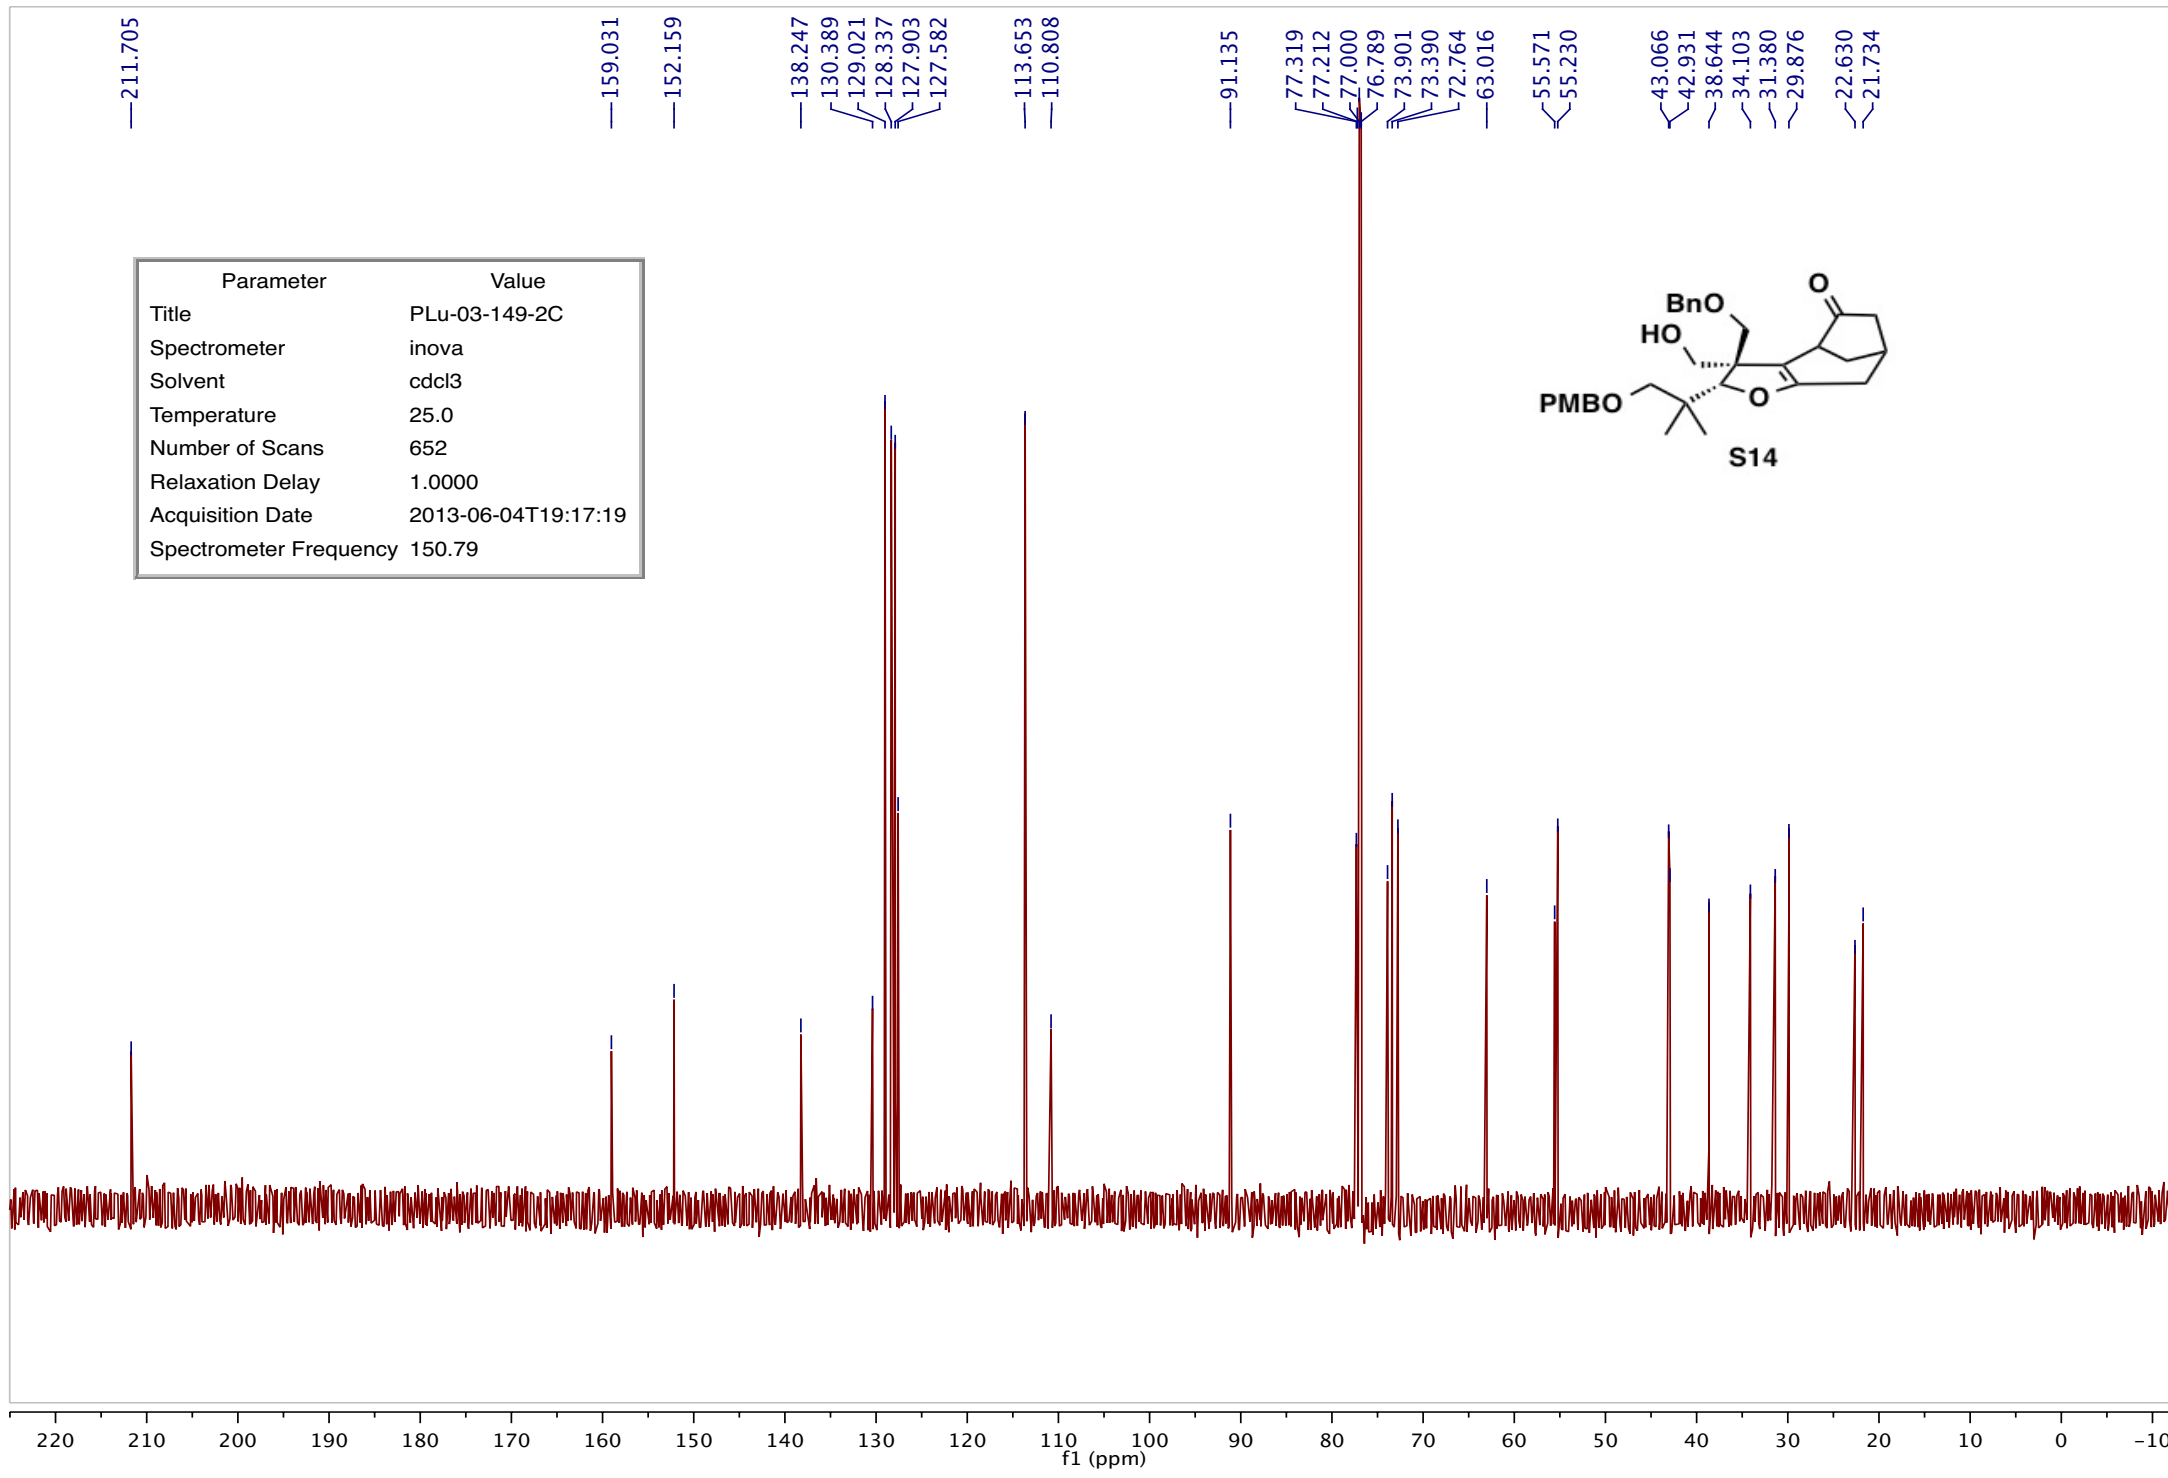

| Parameter              | Value               |
|------------------------|---------------------|
| Title                  | PLu-03-149-2C       |
| Spectrometer           | inova               |
| Solvent                | cdcl3               |
| Temperature            | 25.0                |
| Number of Scans        | 652                 |
| Relaxation Delay       | 1.0000              |
| Acquisition Date       | 2013-06-04T19:17:19 |
| Spectrometer Frequency | 150.79              |

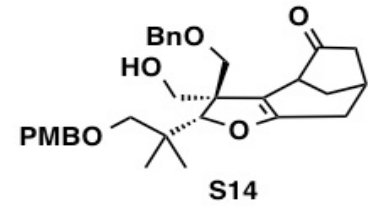

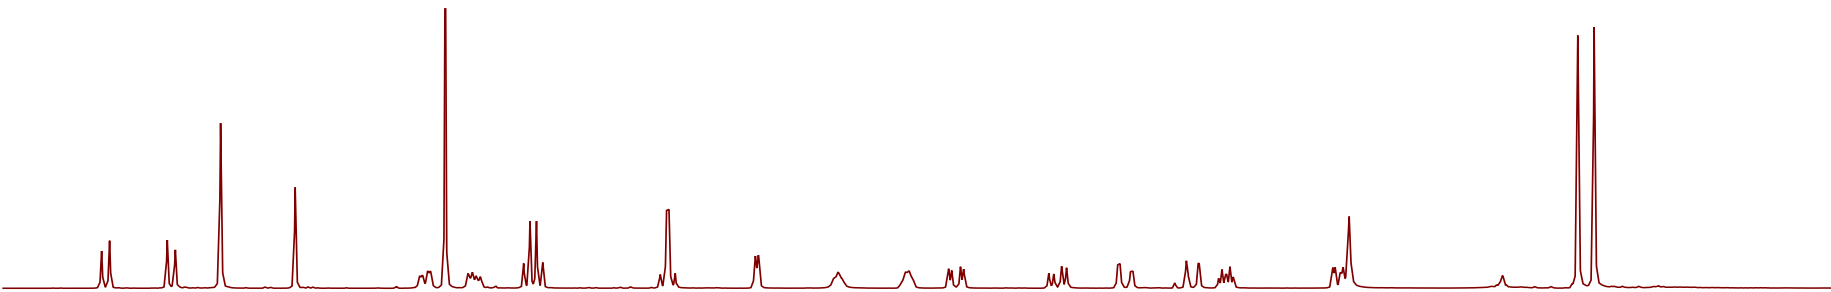

| Parameter              | Value (f2, f1)      |
|------------------------|---------------------|
| Title                  | PLu-03-149-2cosy    |
| Spectrometer           | inova               |
| Solvent                | cdcl3               |
| Temperature            | 25.0                |
| Number of Scans        | 4                   |
| Relaxation Delay       | 1.0000              |
| Acquisition Date       | 2013-06-04T19:35:09 |
| Spectrometer Frequency | (599.63, 599.63)    |
| Nucleus                | (1H, 1H)            |

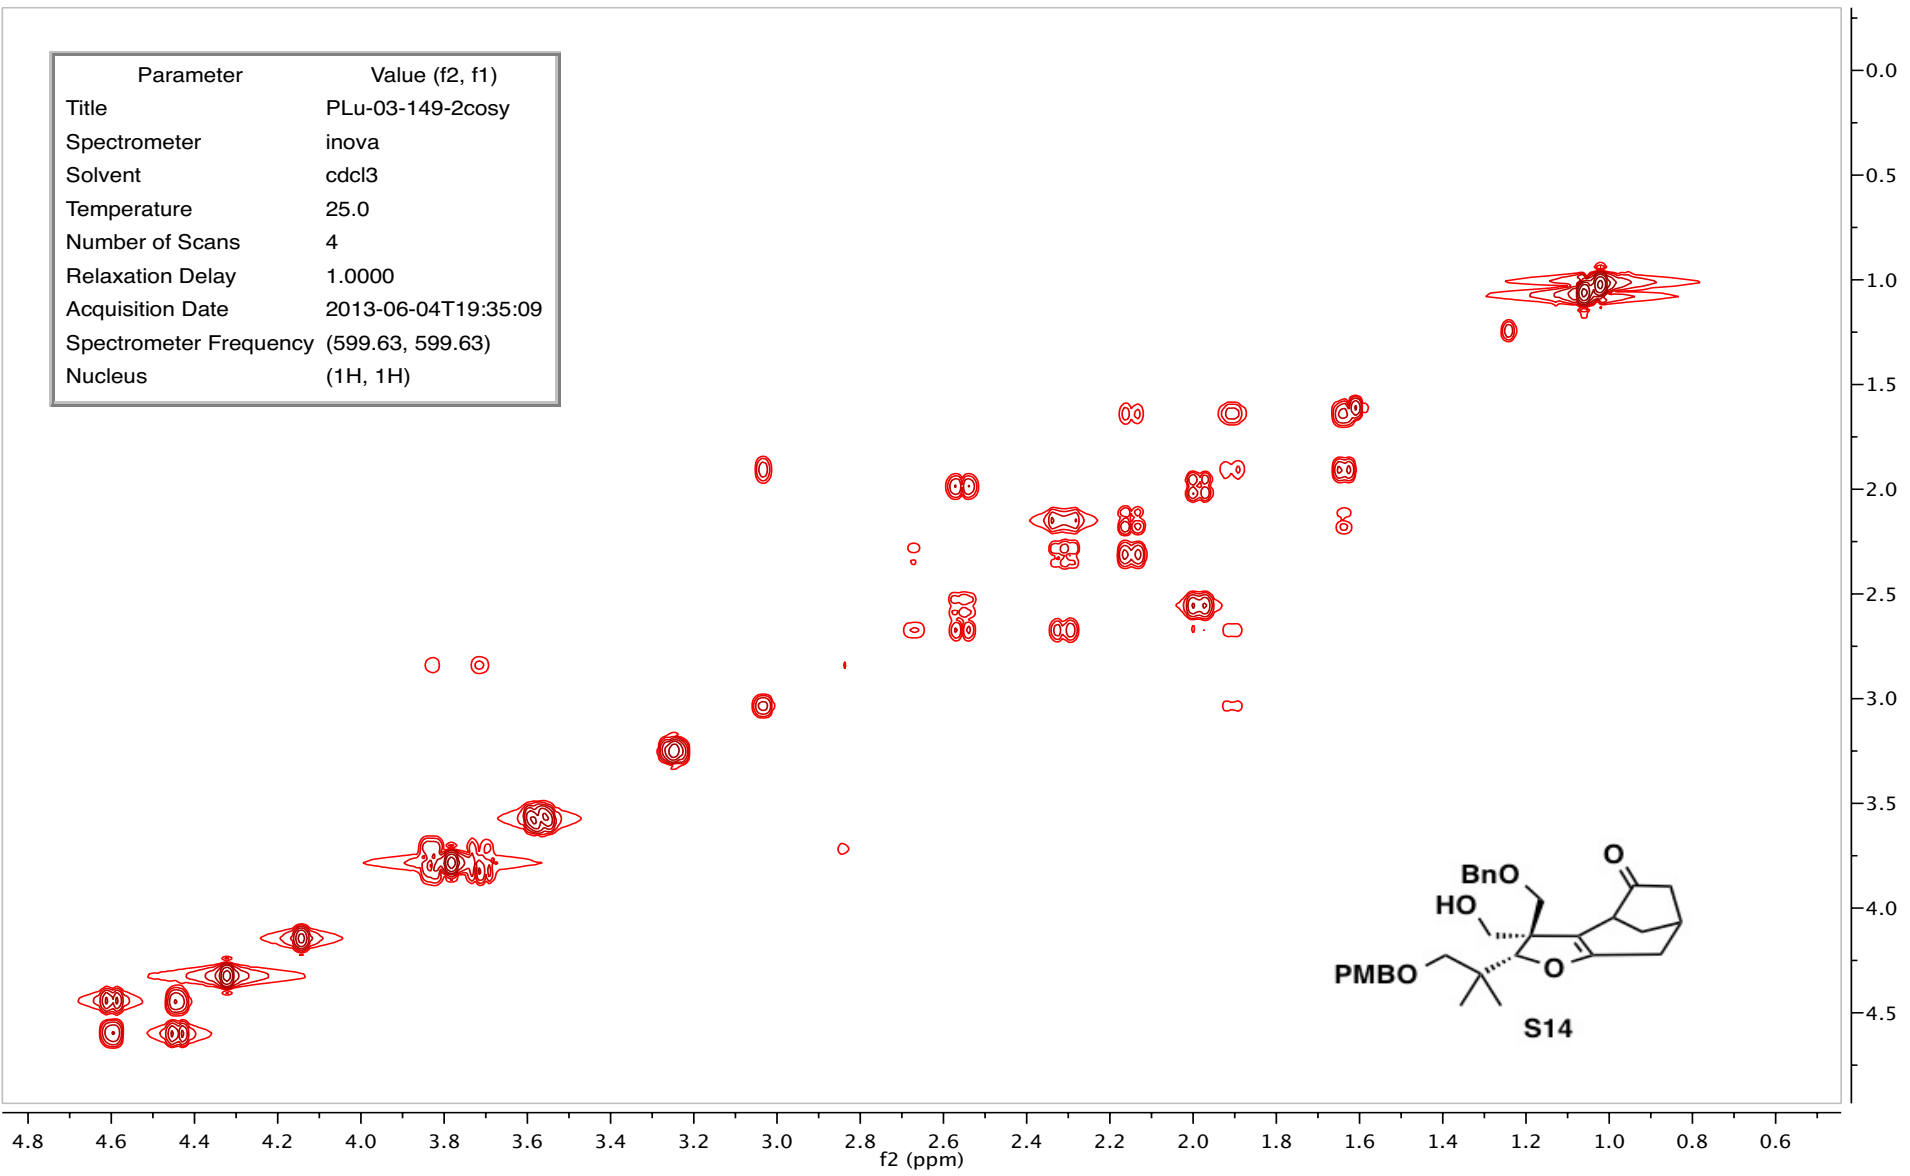

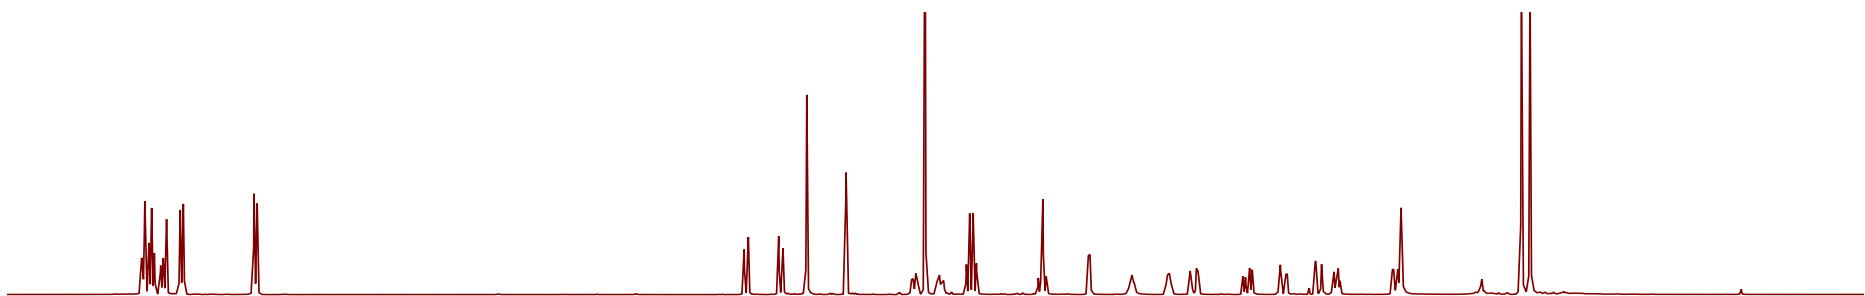

| Parameter                               | Value (f2, f1)                     |
|-----------------------------------------|------------------------------------|
| Title                                   | PLu-03-149-2hsqc                   |
| Spectrometer                            | inova                              |
| Solvent                                 | cdcl3                              |
| Temperature                             | 25.0                               |
| Number of Scans                         | 4                                  |
| Relaxation Delay                        | 1.0000                             |
| Acquisition Date                        | 2013-06-04T19:54:57                |
| Spectrometer Frequency (599.63, 150.79) |                                    |
| Nucleus                                 | ( <sup>1</sup> H, <sup>13</sup> C) |

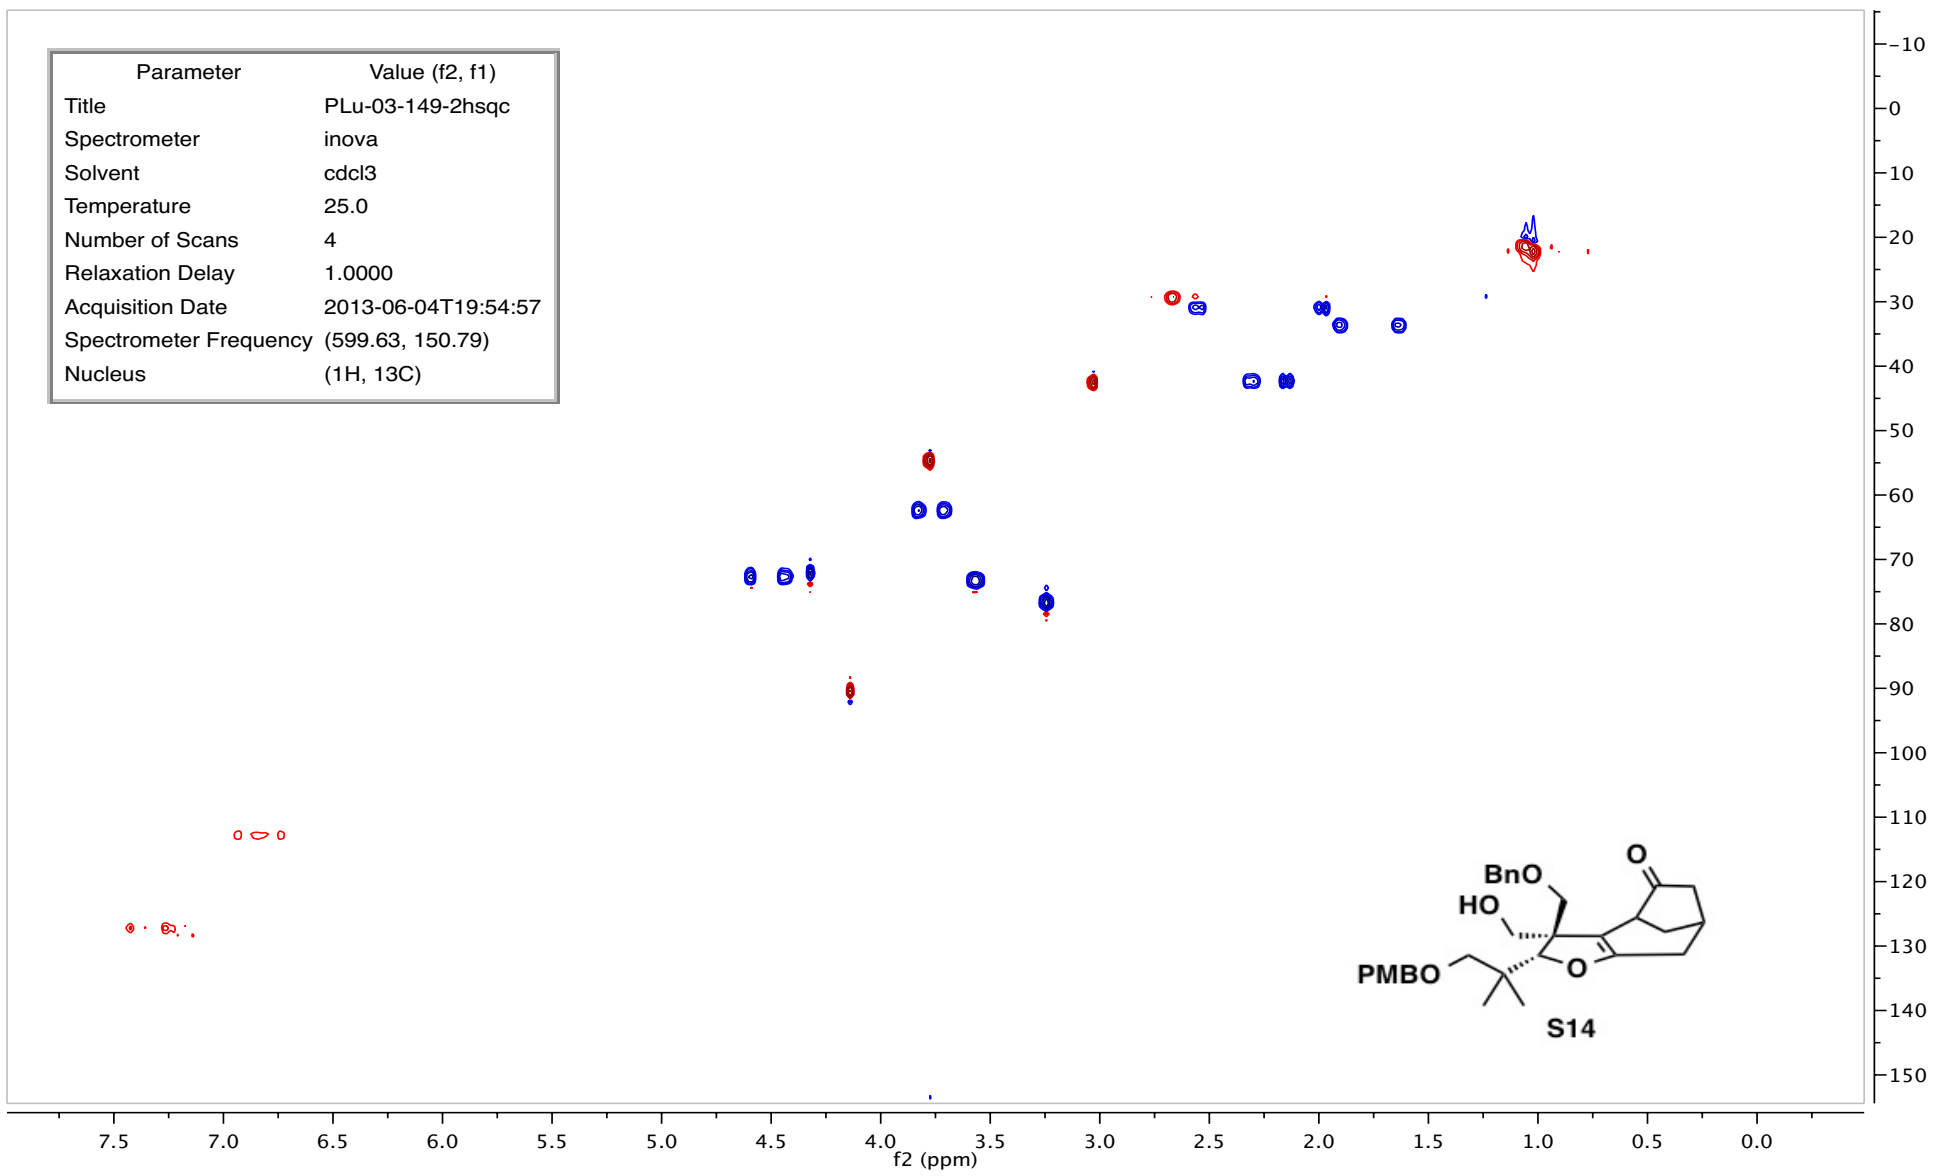



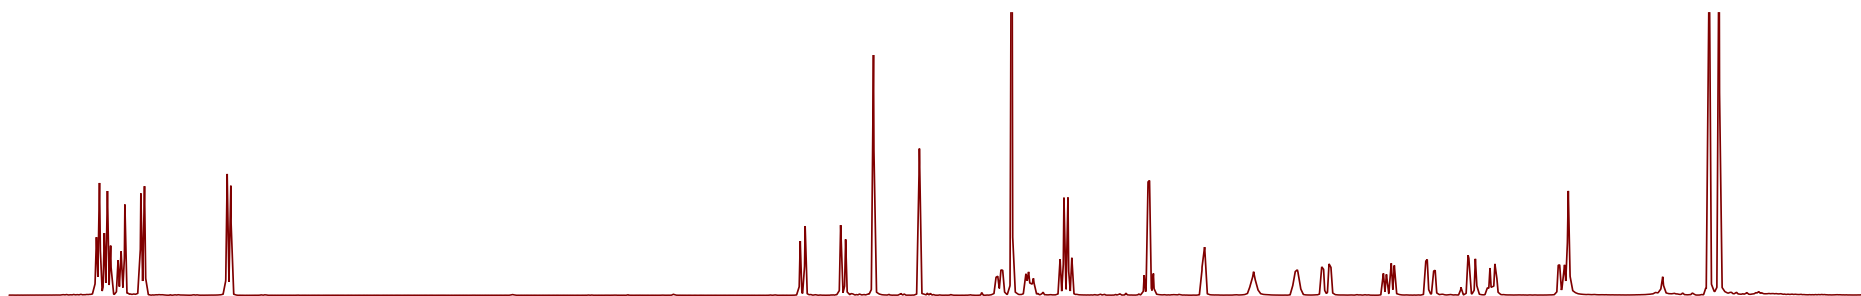

| Parameter              | Value (f2, f1)                     |
|------------------------|------------------------------------|
| Title                  | PLu-03-149-2hmbc                   |
| Spectrometer           | inova                              |
| Solvent                | cdcl3                              |
| Temperature            | 25.0                               |
| Number of Scans        | 8                                  |
| Relaxation Delay       | 1.0000                             |
| Acquisition Date       | 2013-06-04T20:36:55                |
| Spectrometer Frequency | (599.63, 150.79)                   |
| Nucleus                | ( <sup>1</sup> H, <sup>13</sup> C) |

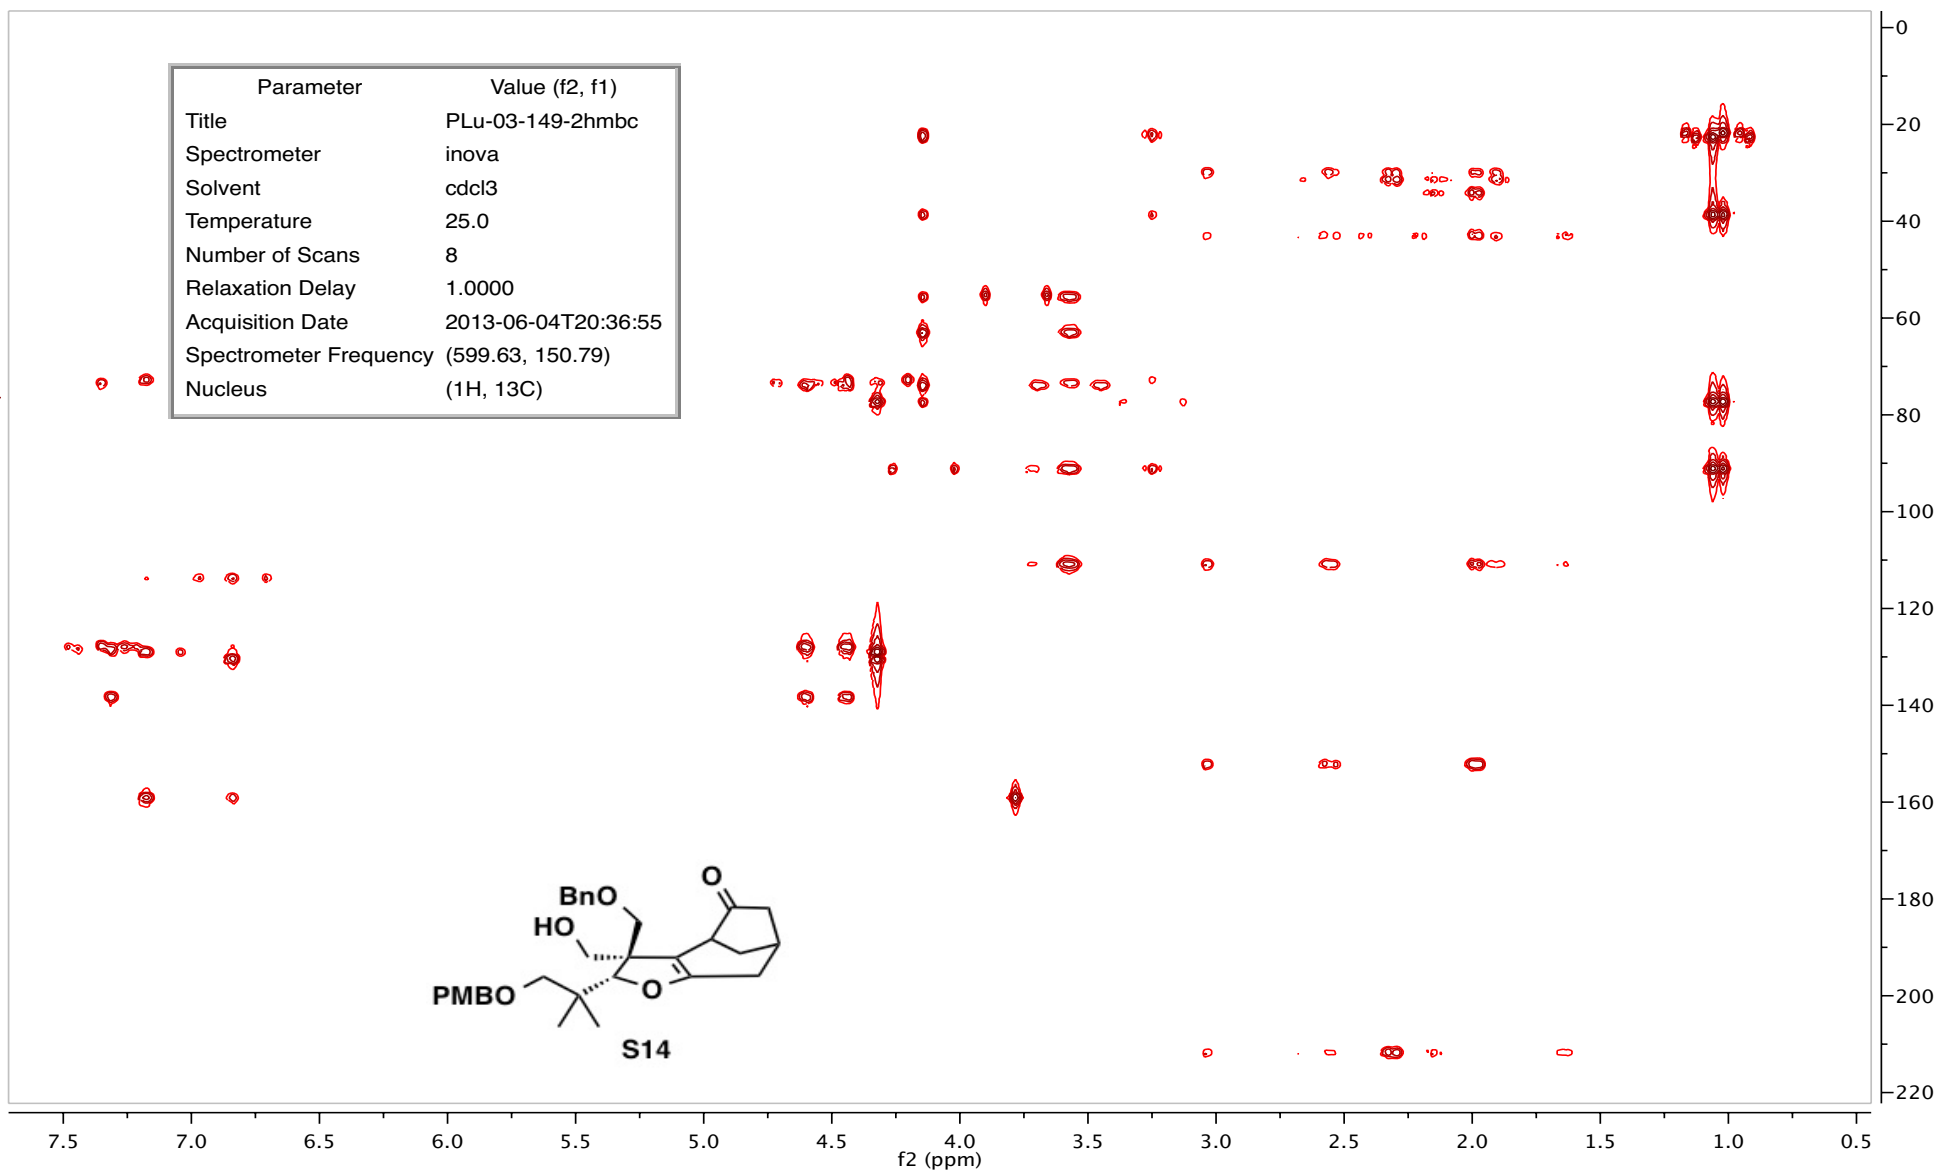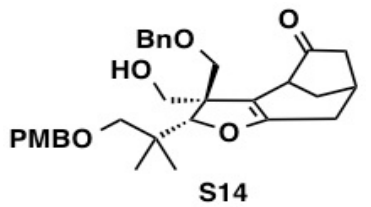



| Parameter              | Value               |
|------------------------|---------------------|
| Title                  | PLu-03-231-HH       |
| Spectrometer           | inova               |
| Solvent                | cdcl3               |
| Temperature            | 25.0                |
| Number of Scans        | 16                  |
| Relaxation Delay       | 4.8000              |
| Acquisition Date       | 2013-06-16T22:03:46 |
| Spectrometer Frequency | 599.64              |

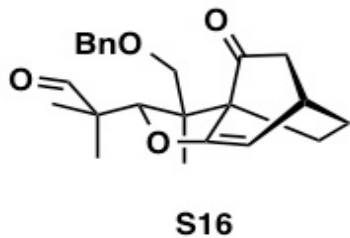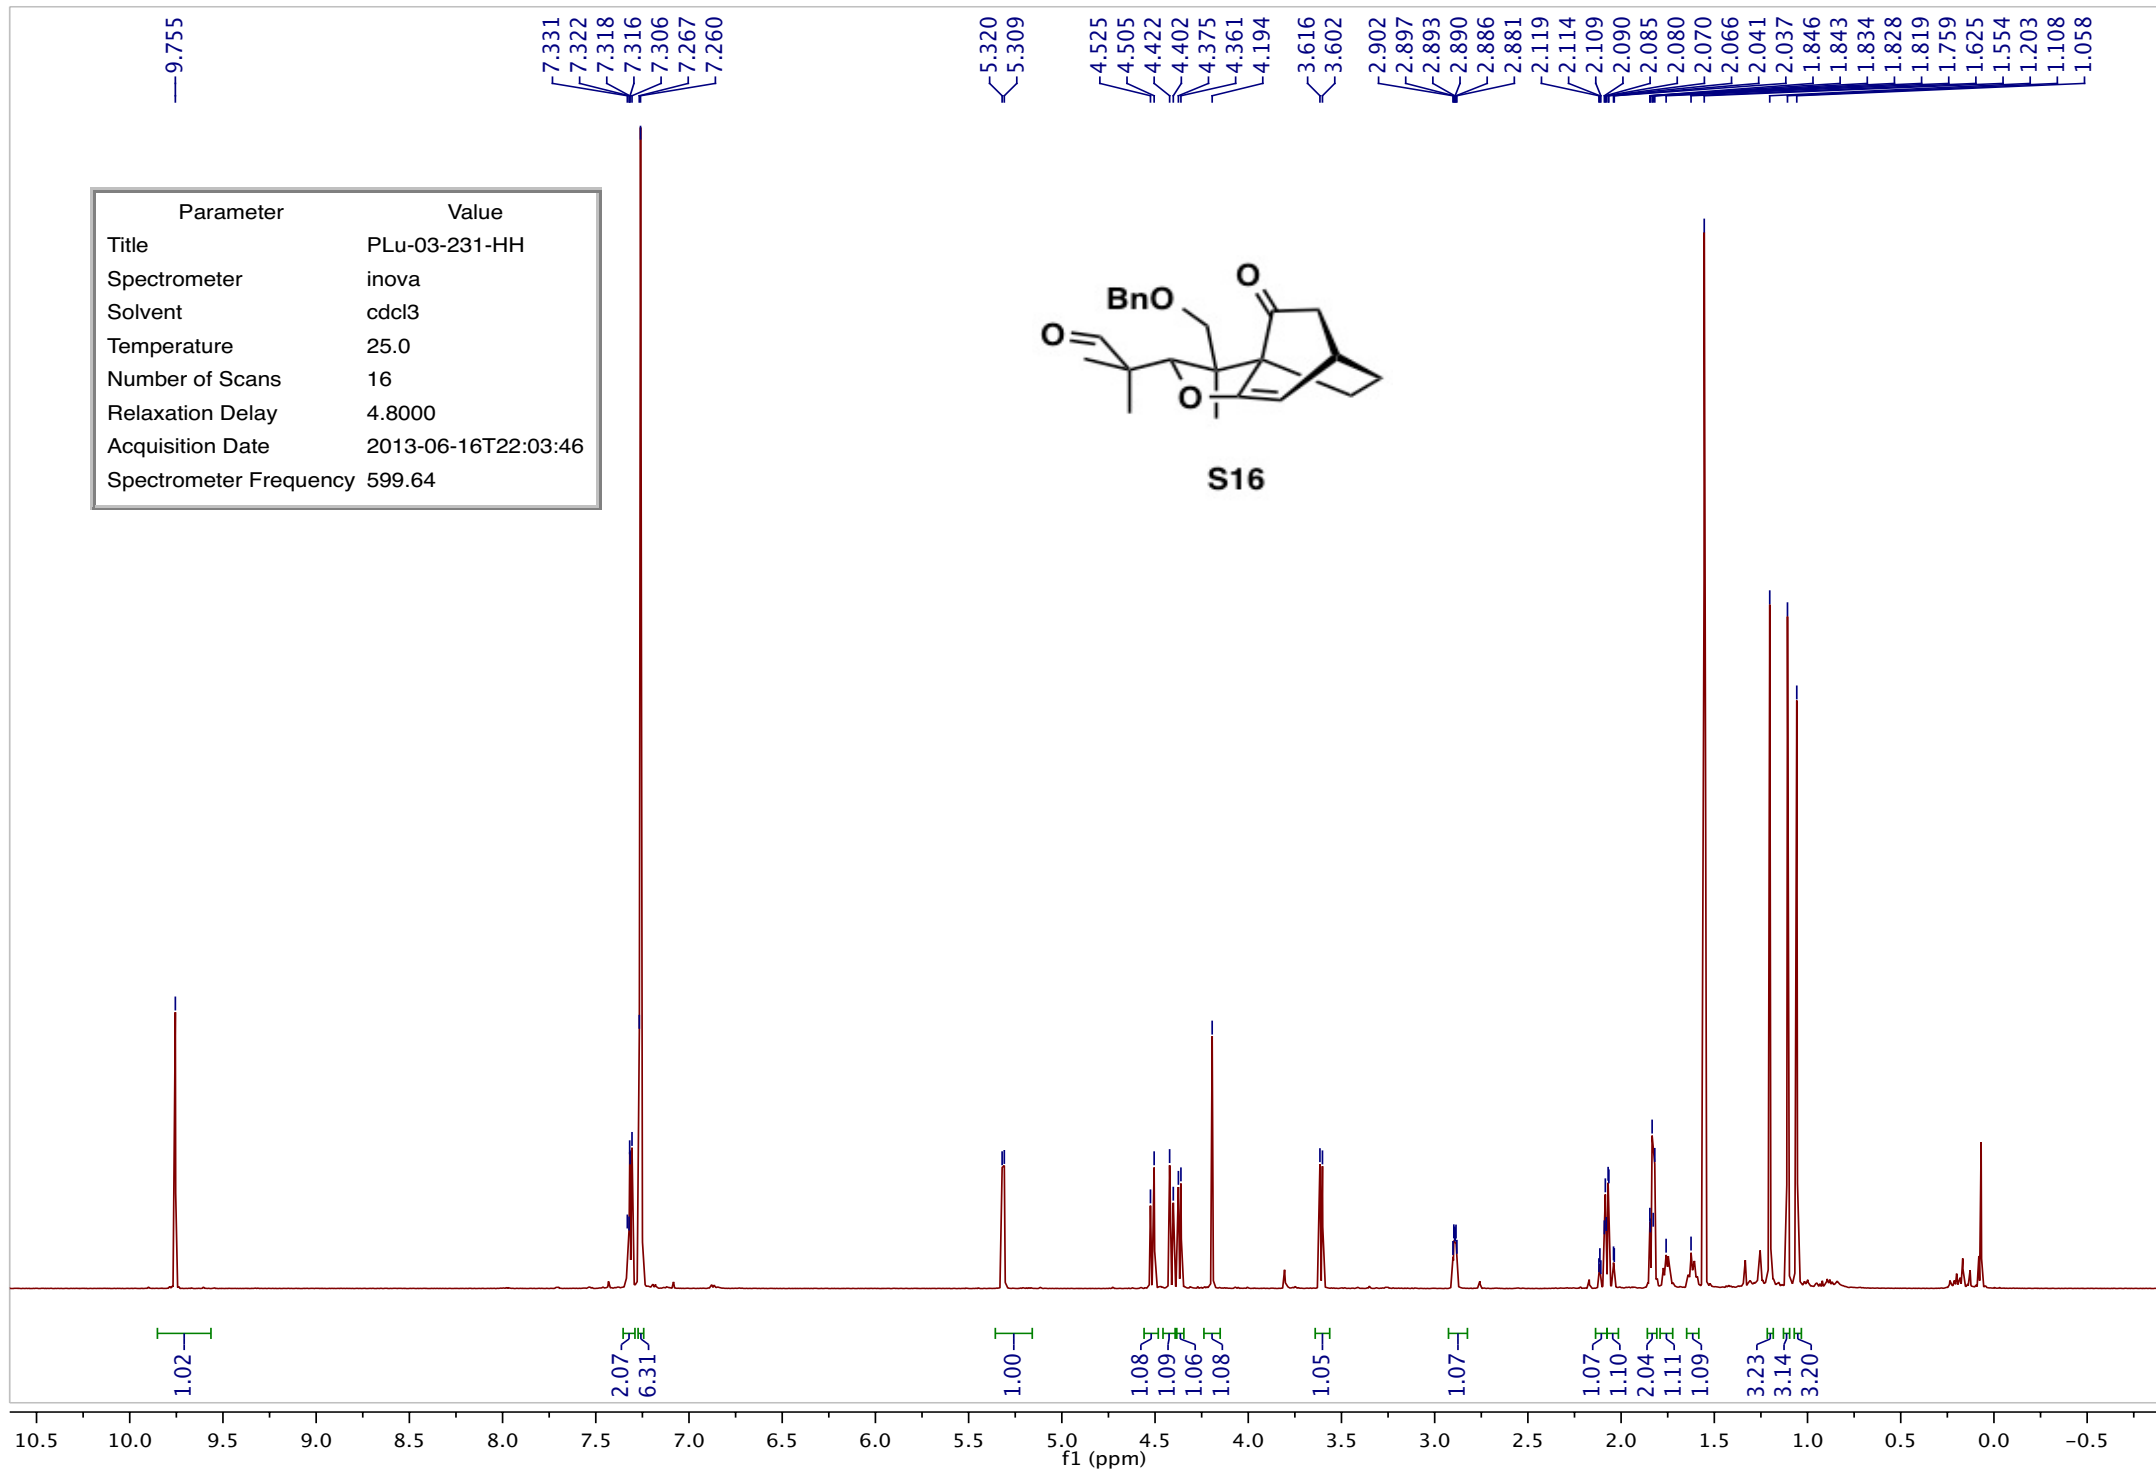

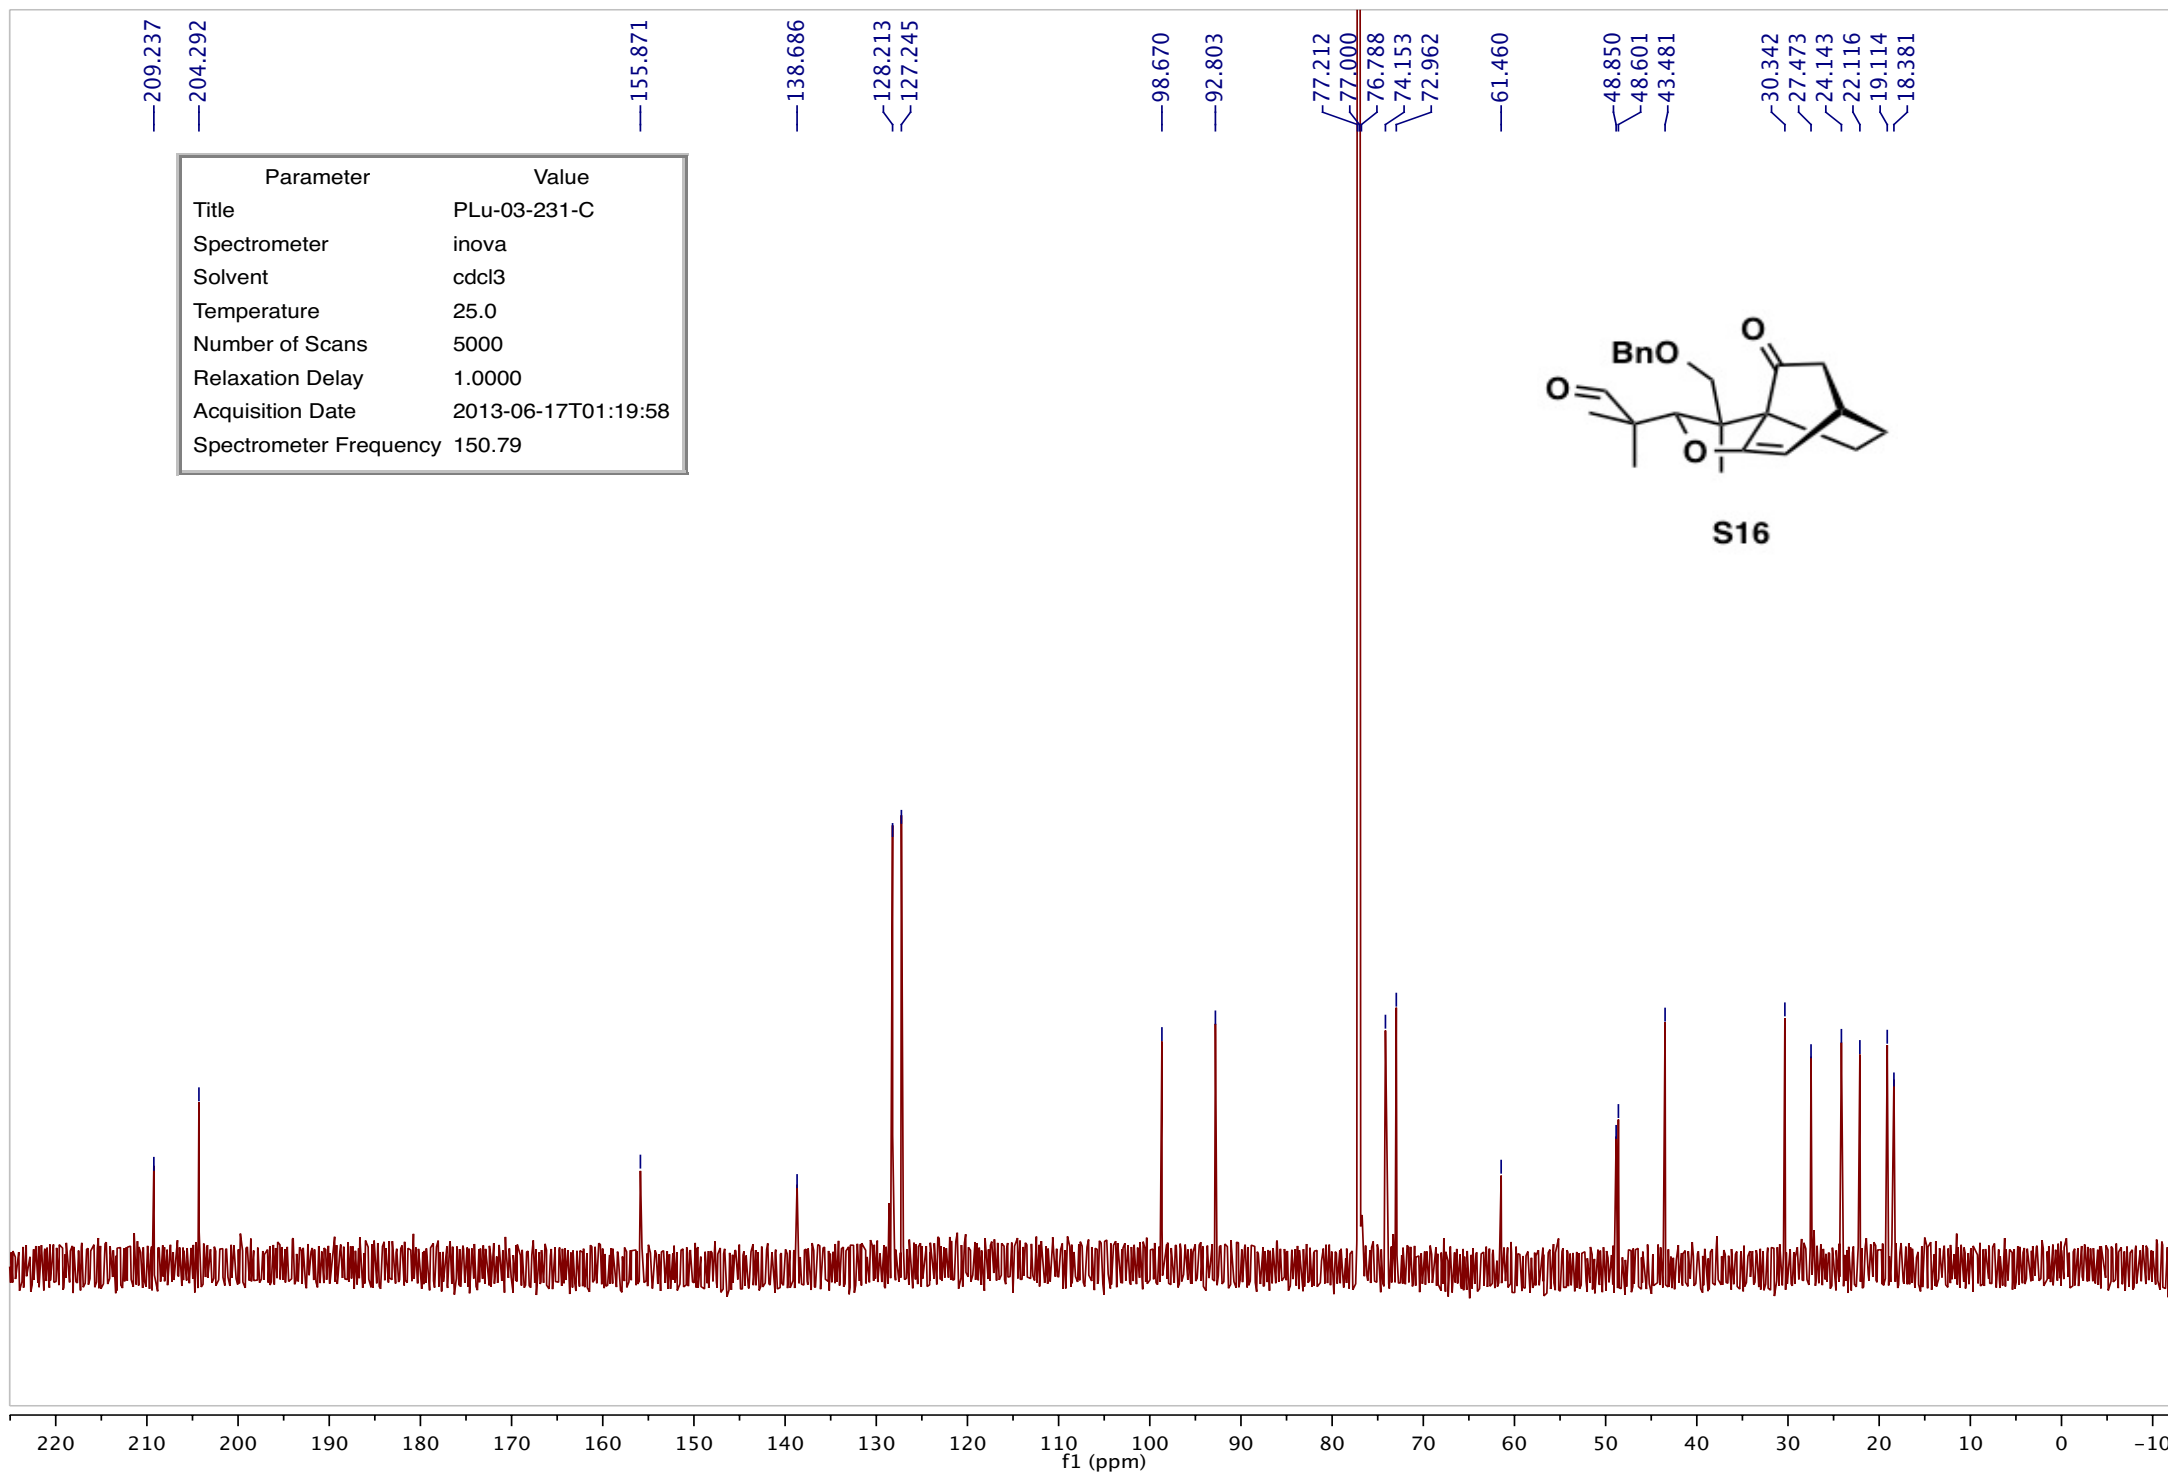

| Parameter              | Value               |
|------------------------|---------------------|
| Title                  | PLu-03-231-C        |
| Spectrometer           | inova               |
| Solvent                | cdcl3               |
| Temperature            | 25.0                |
| Number of Scans        | 5000                |
| Relaxation Delay       | 1.0000              |
| Acquisition Date       | 2013-06-17T01:19:58 |
| Spectrometer Frequency | 150.79              |

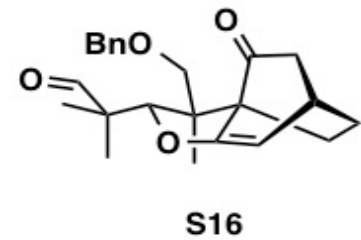

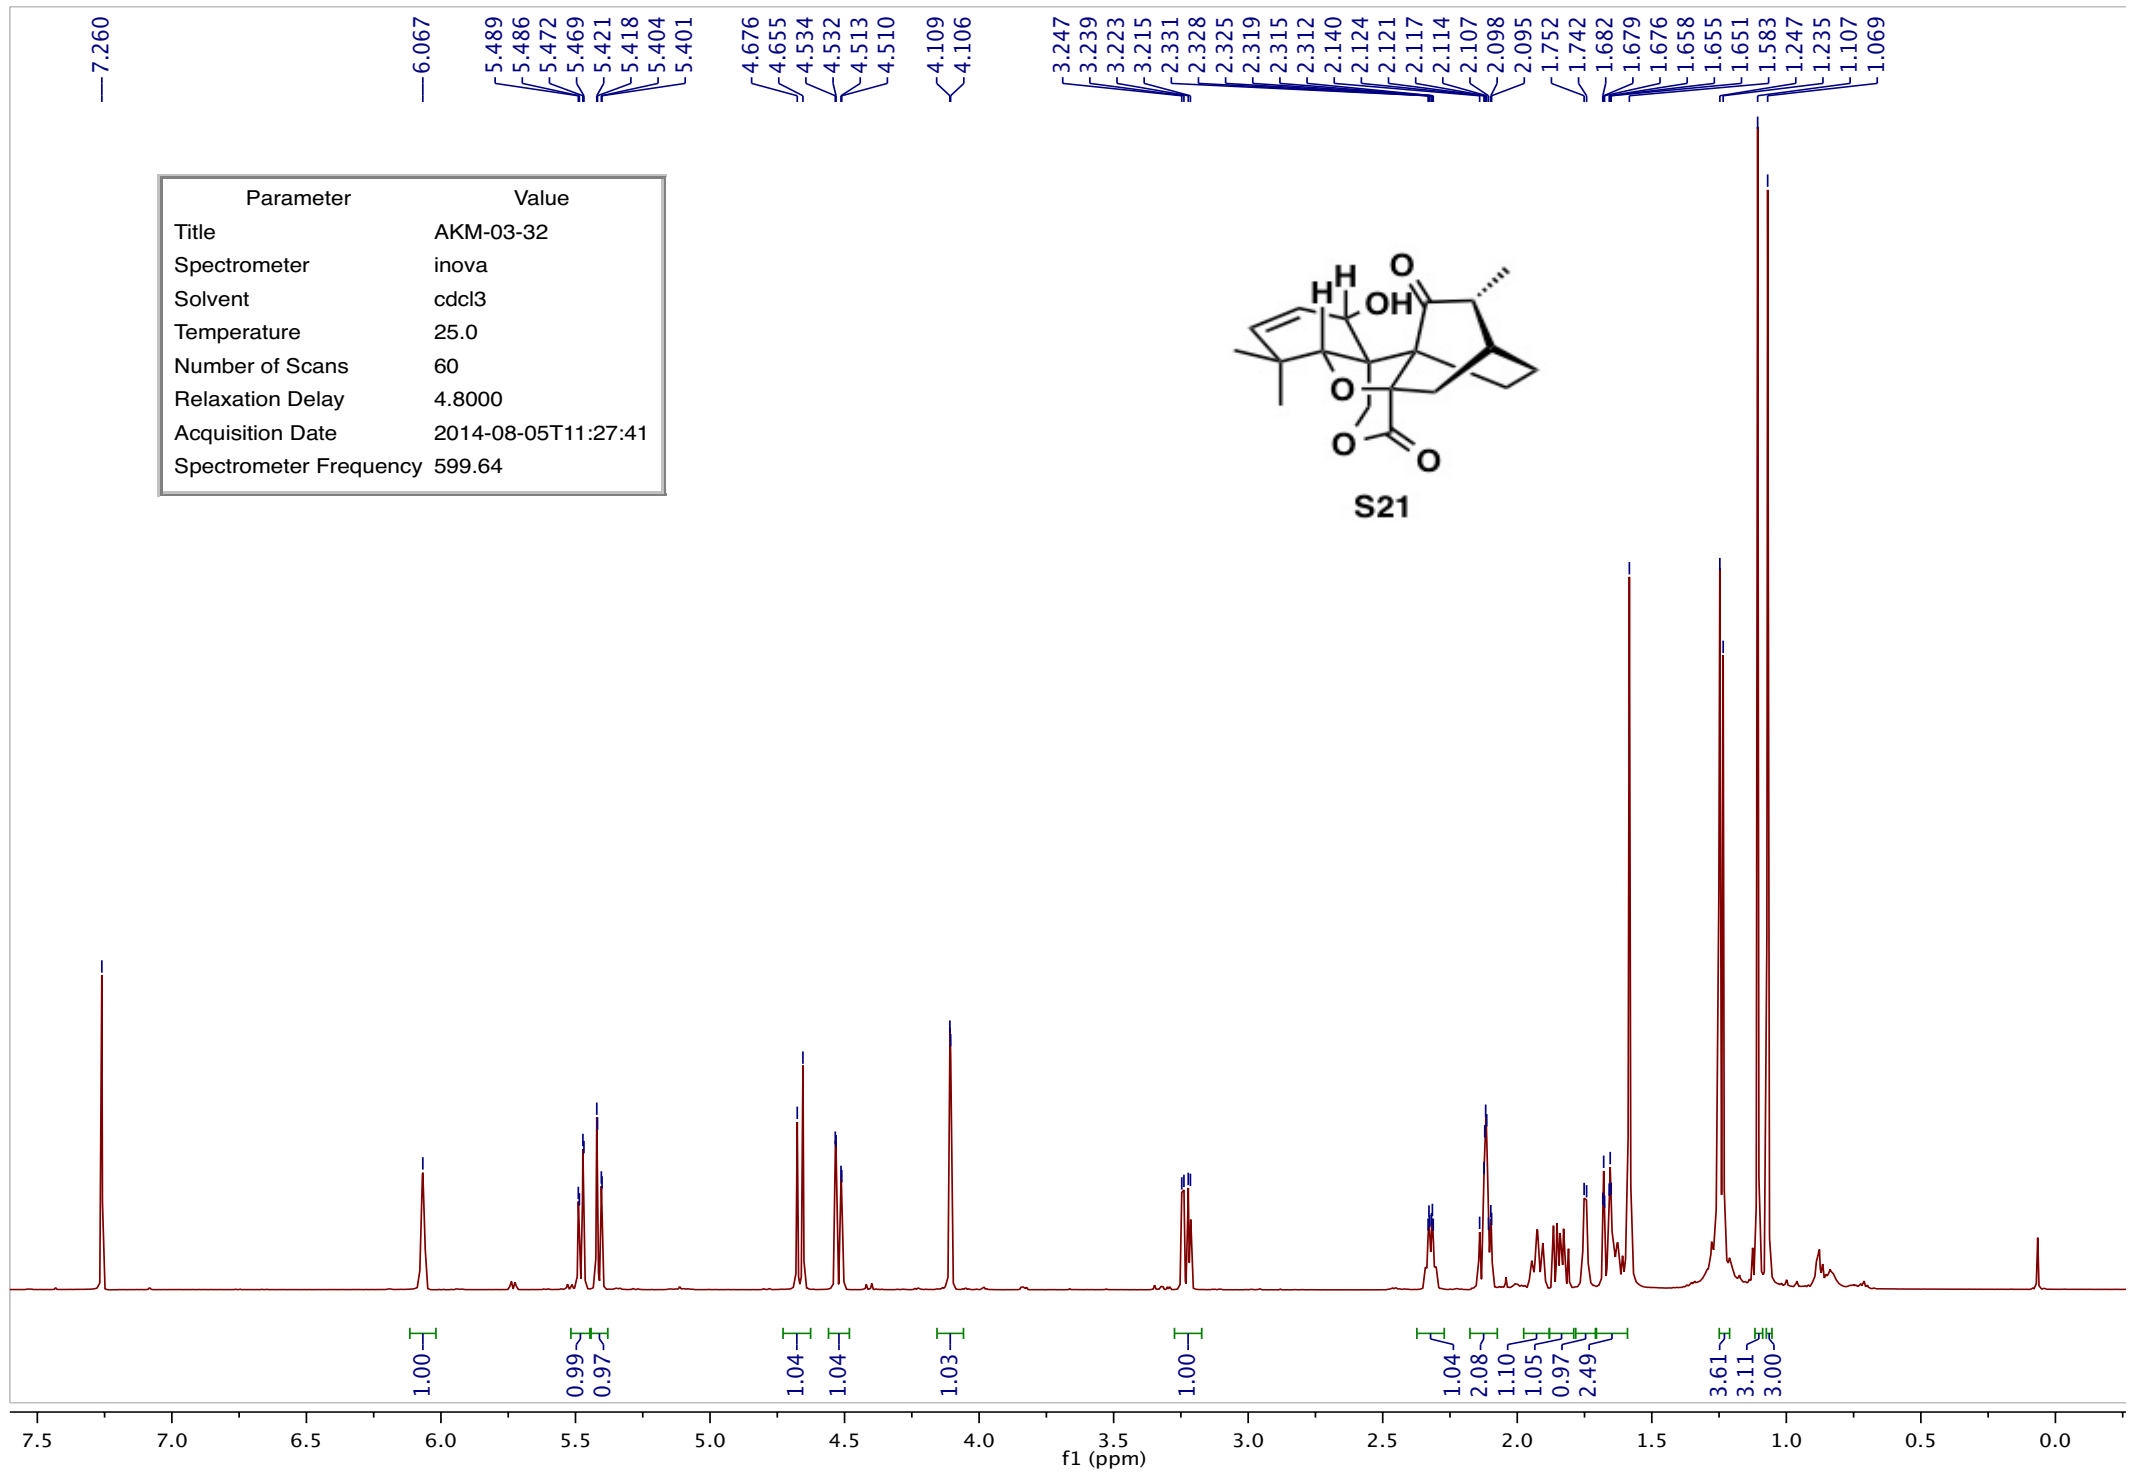

| Parameter              | Value               |
|------------------------|---------------------|
| Title                  | AKM-03-32           |
| Spectrometer           | inova               |
| Solvent                | cdcl3               |
| Temperature            | 25.0                |
| Number of Scans        | 60                  |
| Relaxation Delay       | 4.8000              |
| Acquisition Date       | 2014-08-05T11:27:41 |
| Spectrometer Frequency | 599.64              |

7.260  
 6.067  
 5.489  
 5.486  
 5.472  
 5.469  
 5.421  
 5.418  
 5.404  
 5.401  
 4.676  
 4.655  
 4.534  
 4.532  
 4.513  
 4.510  
 4.109  
 4.106  
 3.247  
 3.239  
 3.223  
 3.215  
 3.211  
 2.328  
 2.325  
 2.319  
 2.315  
 2.312  
 2.140  
 2.124  
 2.121  
 2.117  
 2.114  
 2.107  
 2.098  
 2.095  
 1.752  
 1.742  
 1.682  
 1.679  
 1.676  
 1.658  
 1.655  
 1.651  
 1.583  
 1.247  
 1.235  
 1.107  
 1.069

1.00  
 0.99  
 0.97  
 1.04  
 1.04  
 1.03  
 1.00  
 1.04  
 2.08  
 1.10  
 1.05  
 0.97  
 2.49  
 3.61  
 3.11  
 3.00

7.5  
 7.0  
 6.5  
 6.0  
 5.5  
 5.0  
 4.5  
 4.0  
 3.5  
 3.0  
 2.5  
 2.0  
 1.5  
 1.0  
 0.5  
 0.0

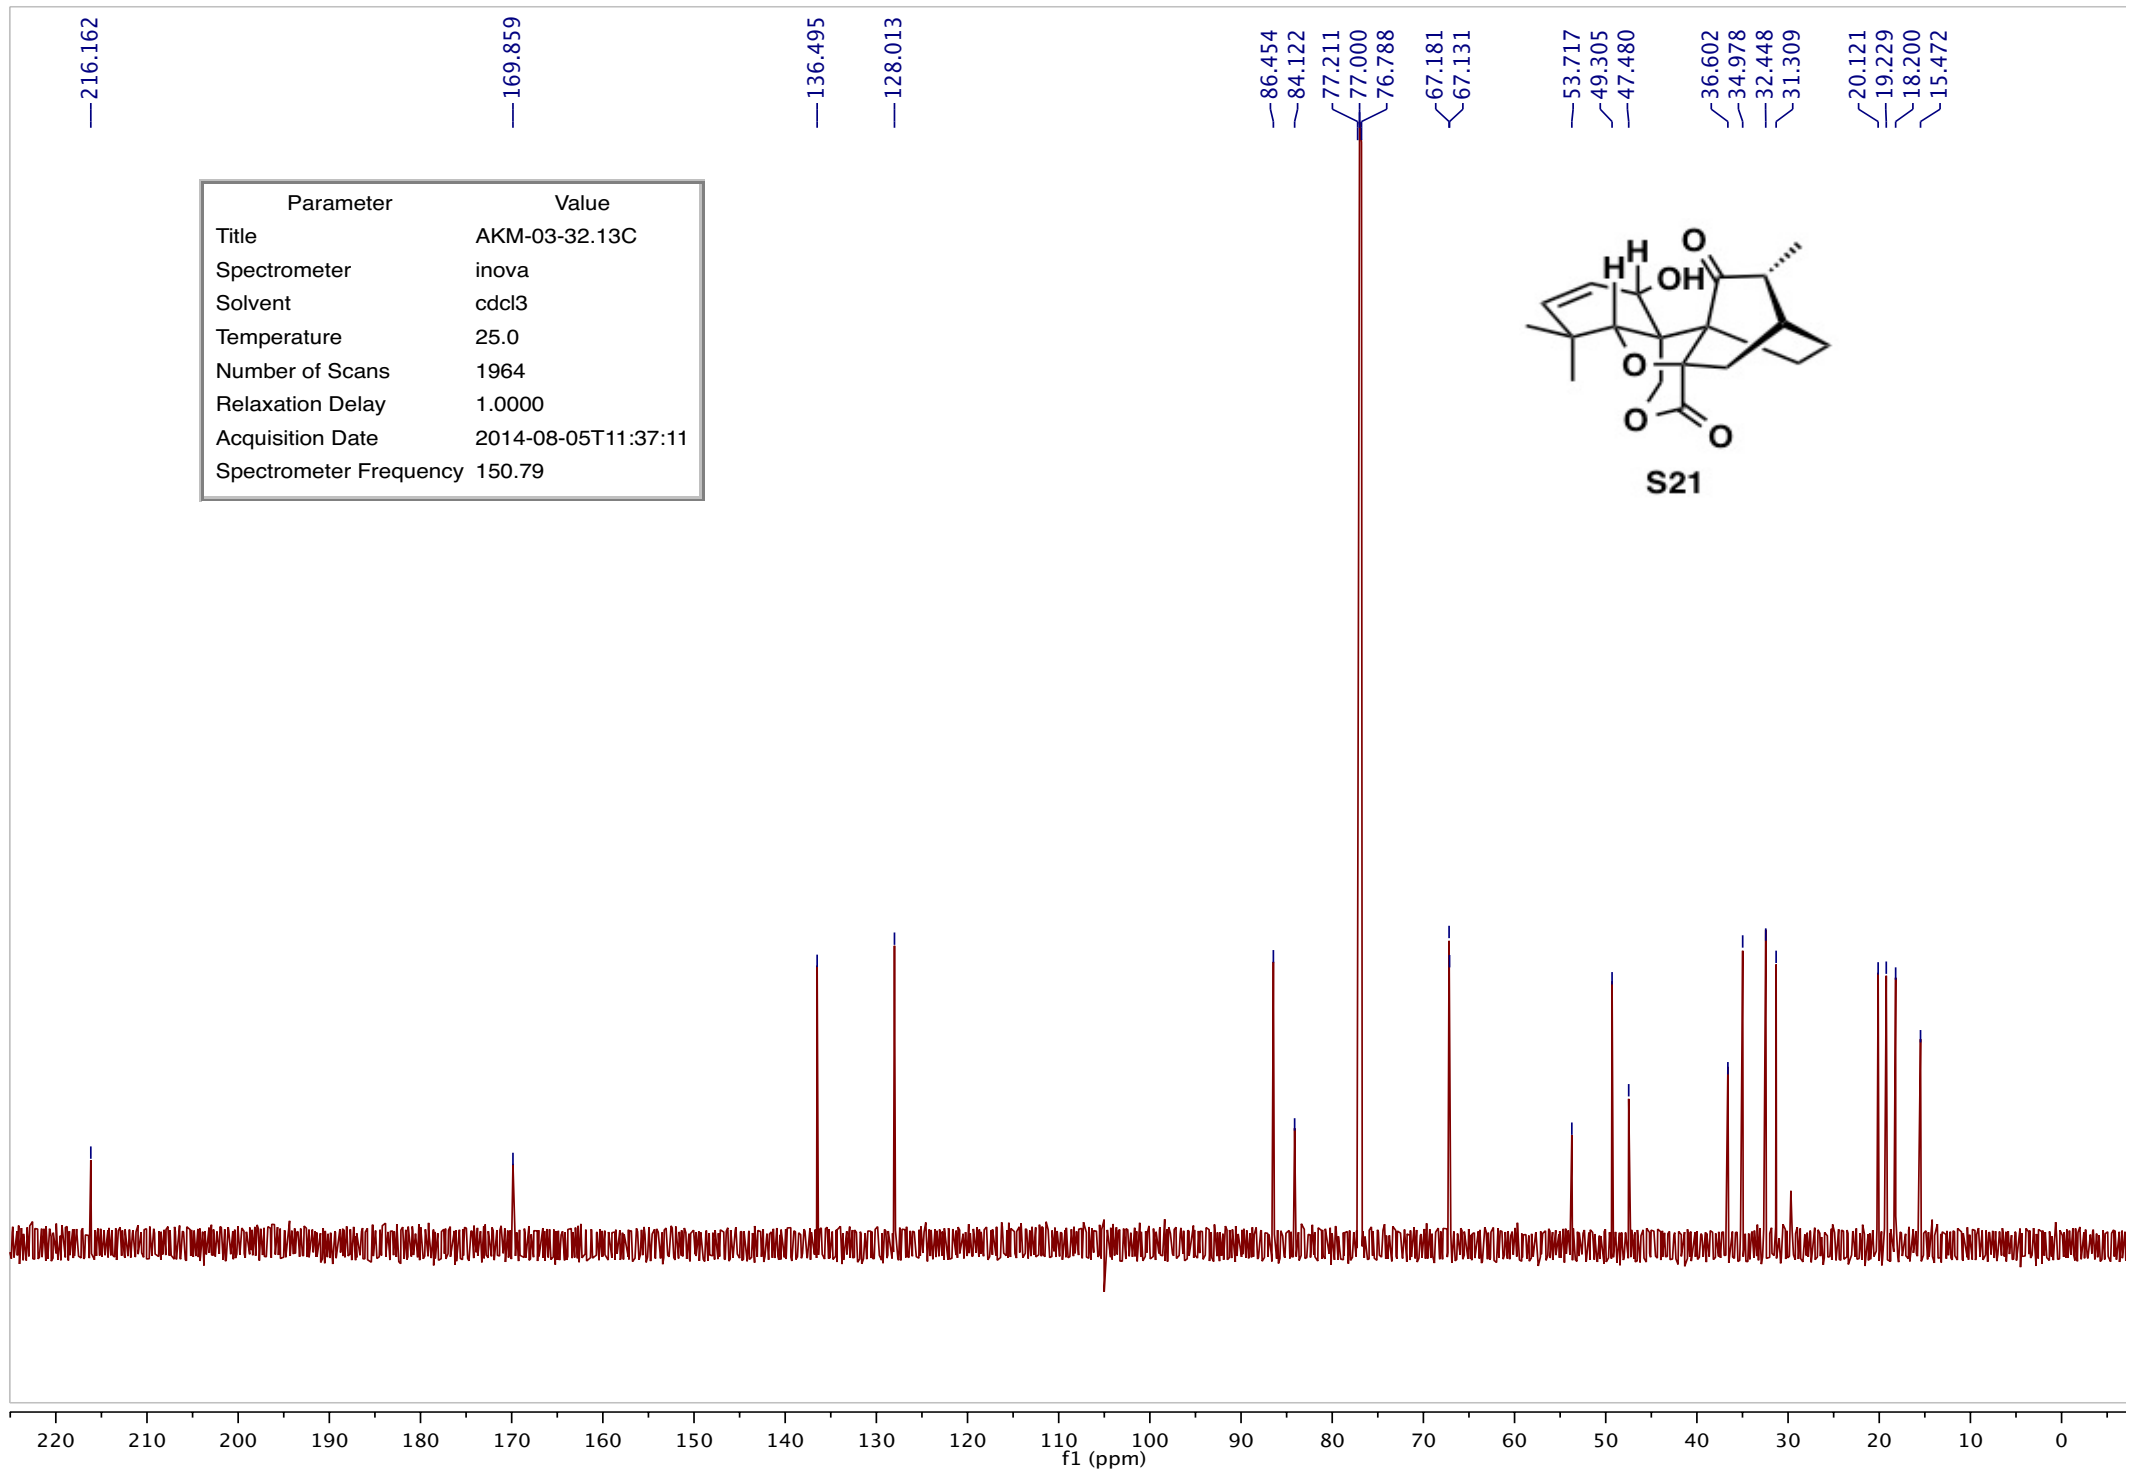

| Parameter              | Value               |
|------------------------|---------------------|
| Title                  | AKM-03-32.13C       |
| Spectrometer           | inova               |
| Solvent                | cdcl3               |
| Temperature            | 25.0                |
| Number of Scans        | 1964                |
| Relaxation Delay       | 1.0000              |
| Acquisition Date       | 2014-08-05T11:37:11 |
| Spectrometer Frequency | 150.79              |

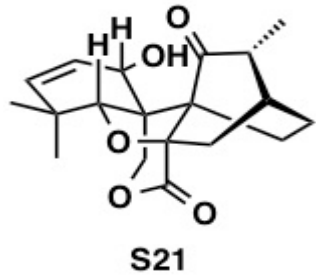

| Parameter              | Value (f2, f1)      |
|------------------------|---------------------|
| Title                  | AKM-03-32-COSY      |
| Spectrometer           | inova               |
| Solvent                | cdcl3               |
| Temperature            | 25.0                |
| Number of Scans        | 4                   |
| Relaxation Delay       | 1.0000              |
| Acquisition Date       | 2014-08-06T14:40:45 |
| Spectrometer Frequency | (599.63, 599.63)    |
| Nucleus                | (1H, 1H)            |

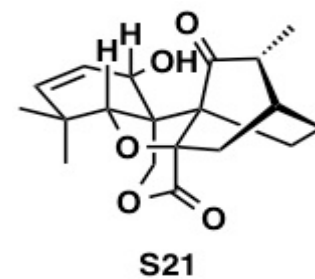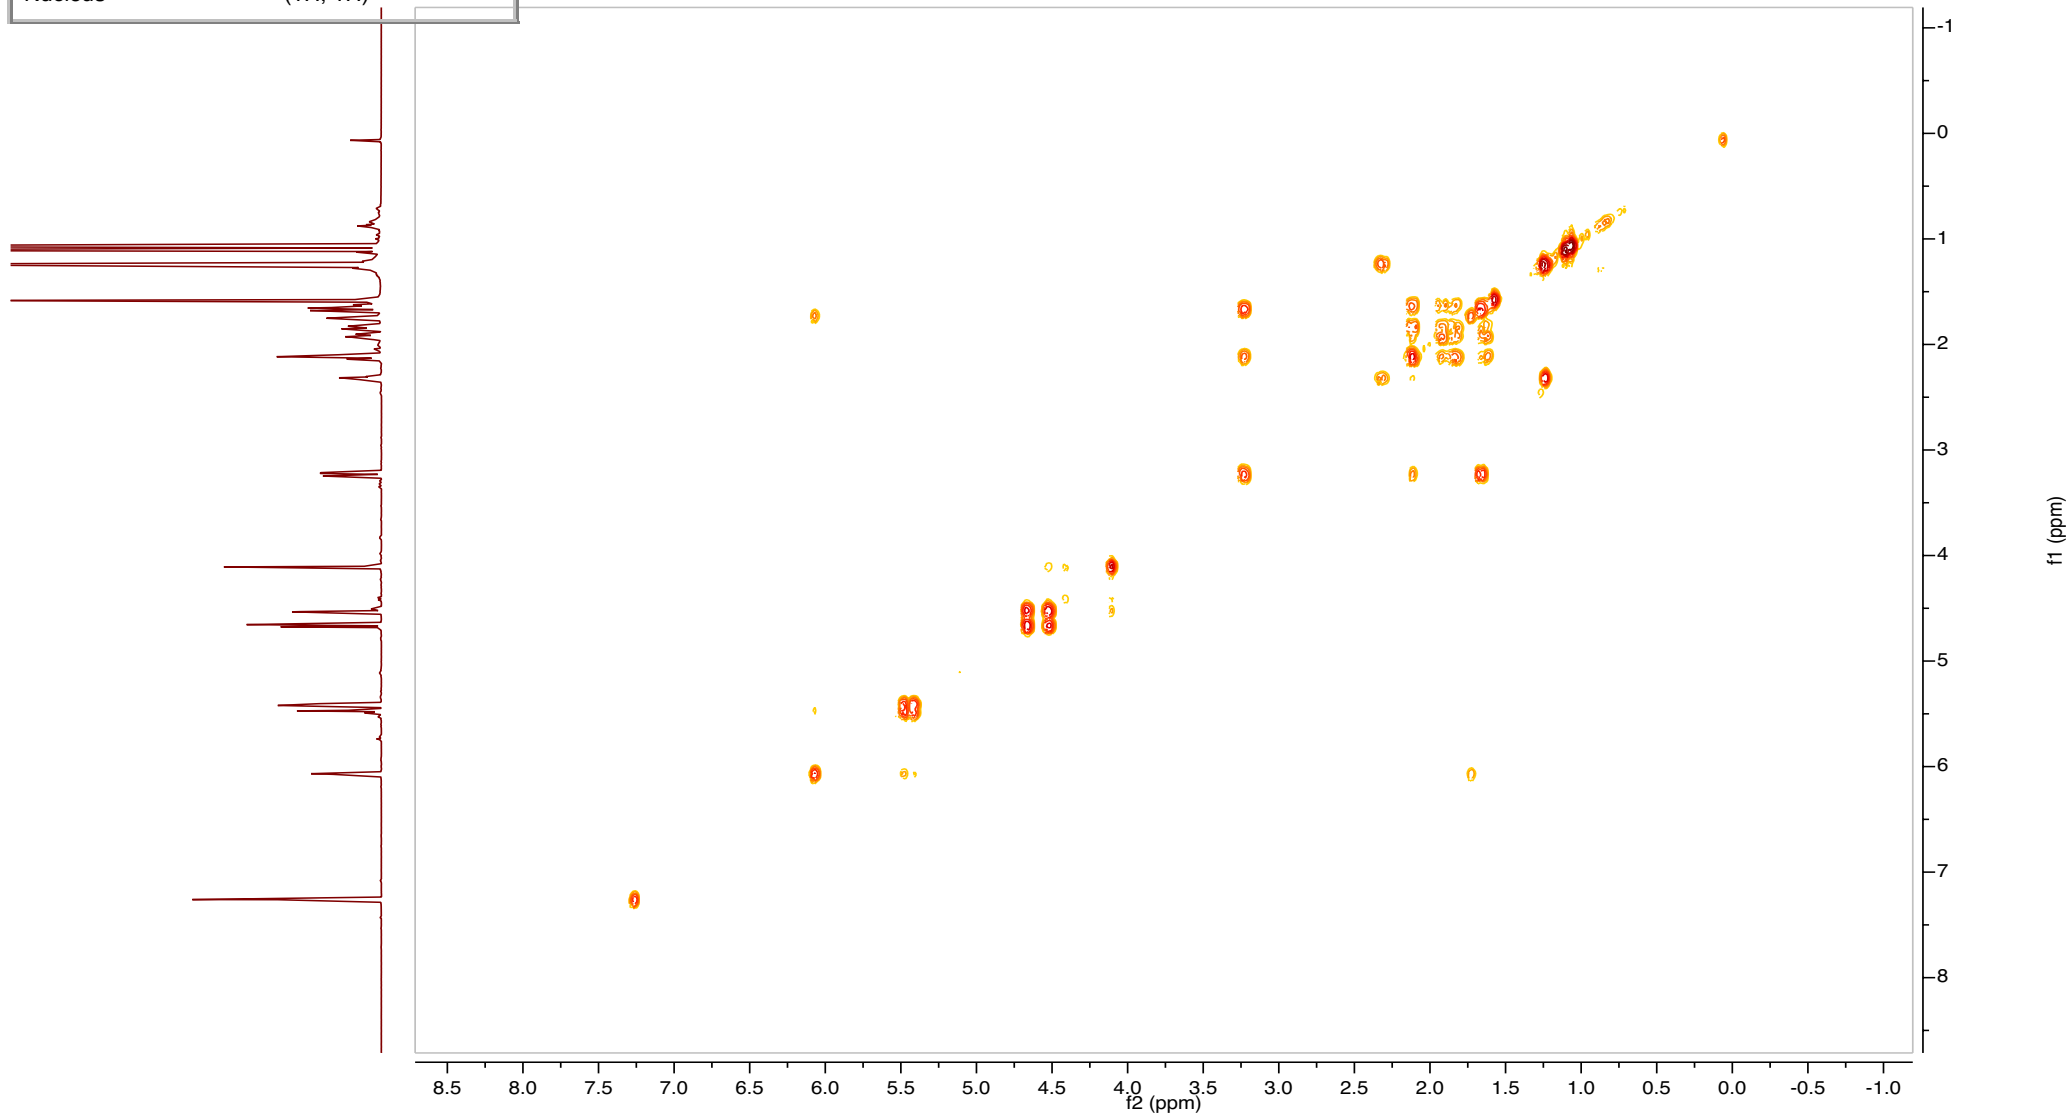

| Parameter              | Value (f2, f1)      |
|------------------------|---------------------|
| Title                  | AKM-03-32-HSQC1     |
| Spectrometer           | inova               |
| Solvent                | cdcl3               |
| Temperature            | 25.0                |
| Number of Scans        | 4                   |
| Relaxation Delay       | 1.0000              |
| Acquisition Date       | 2014-08-06T17:41:25 |
| Spectrometer Frequency | (599.63, 150.79)    |
| Nucleus                | (1H, 13C)           |

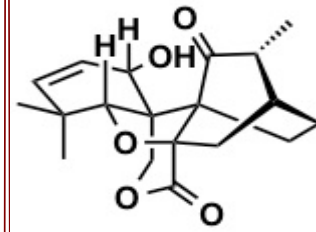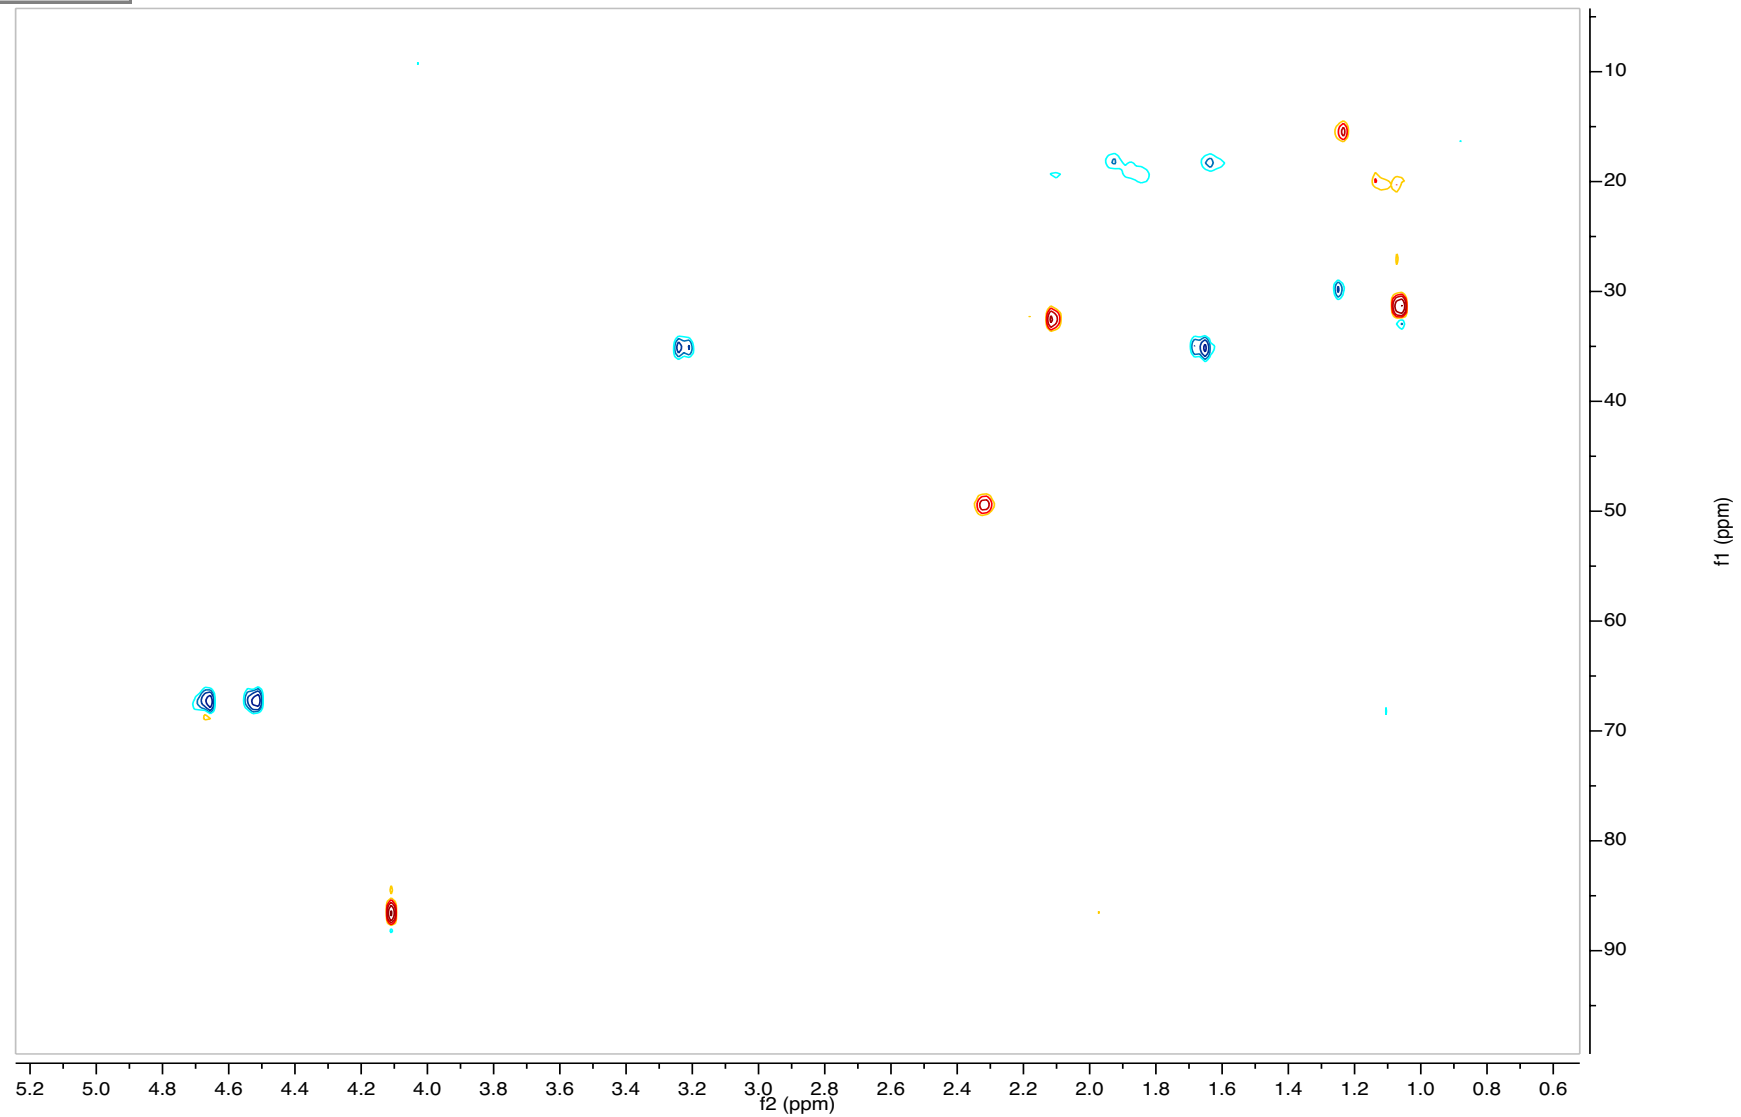



| Parameter              | Value                       |
|------------------------|-----------------------------|
| Title                  | AKM-03-32-CYCLENONE-6.00PPM |
| Spectrometer           | inova                       |
| Solvent                | CDCl3                       |
| Temperature            | 25.0                        |
| Number of Scans        | 64                          |
| Relaxation Delay       | 7.2500                      |
| Acquisition Date       | 2014-08-05T22:30:12         |
| Spectrometer Frequency | 499.86                      |

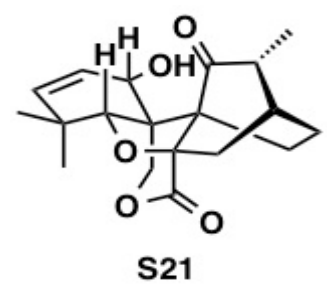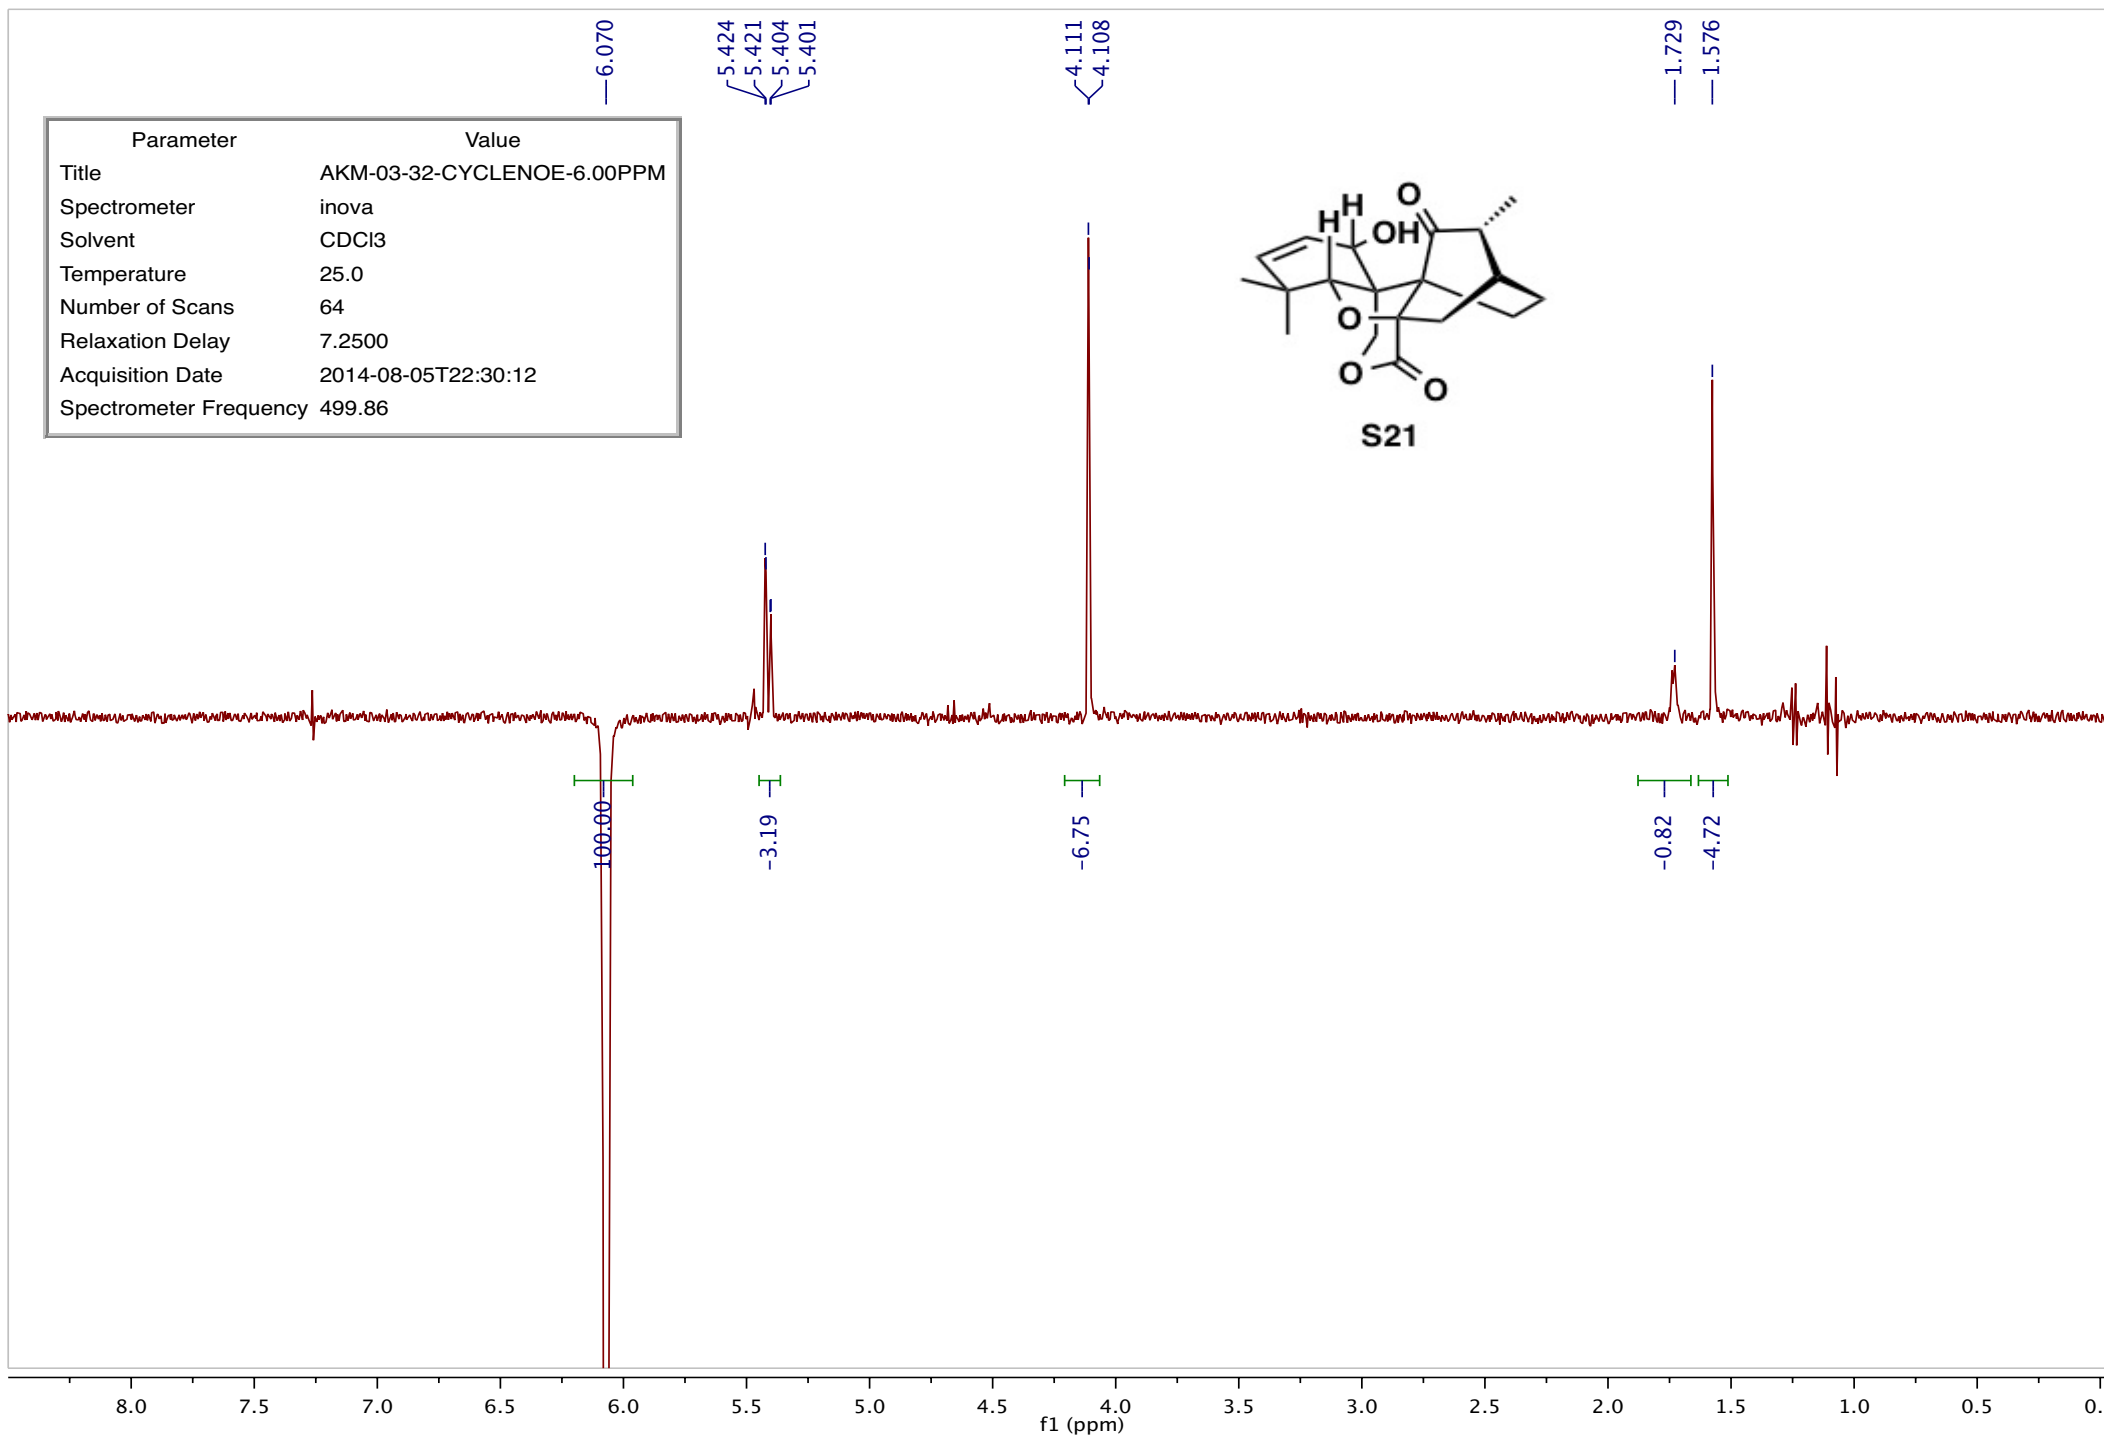

| Parameter              | Value                       |
|------------------------|-----------------------------|
| Title                  | AKM-03-32-CYCLENONE-5.48PPM |
| Spectrometer           | inova                       |
| Solvent                | CDCl3                       |
| Temperature            | 25.0                        |
| Number of Scans        | 36                          |
| Relaxation Delay       | 7.2500                      |
| Acquisition Date       | 2014-08-05T22:58:51         |
| Spectrometer Frequency | 499.86                      |

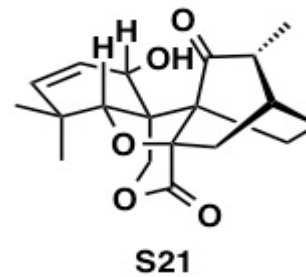

5.500  
5.496  
5.480  
5.475

1.115  
1.077

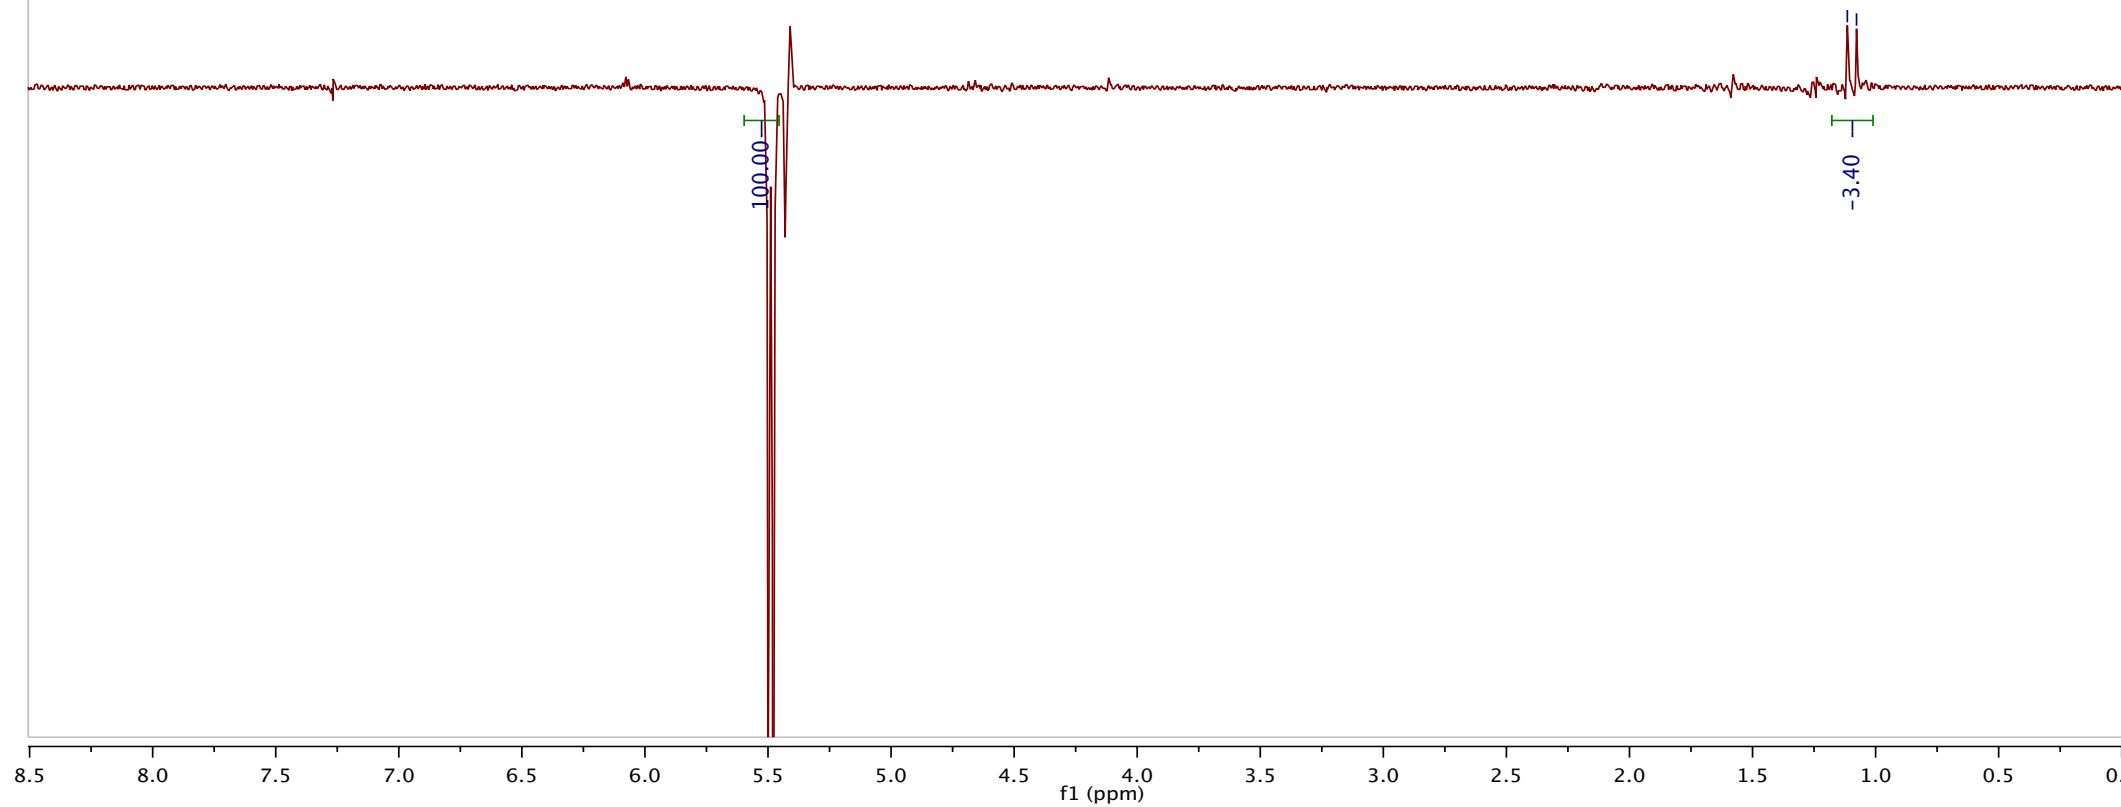

| Parameter              | Value                       |
|------------------------|-----------------------------|
| Title                  | AKM-03-32-CYCLENONE-4.67PPM |
| Spectrometer           | inova                       |
| Solvent                | CDCl3                       |
| Temperature            | 25.0                        |
| Number of Scans        | 64                          |
| Relaxation Delay       | 7.2500                      |
| Acquisition Date       | 2014-08-05T23:50:34         |
| Spectrometer Frequency | 499.86                      |

4.686  
4.660  
4.544  
4.519

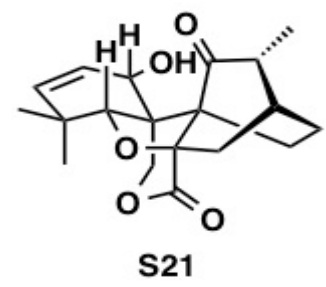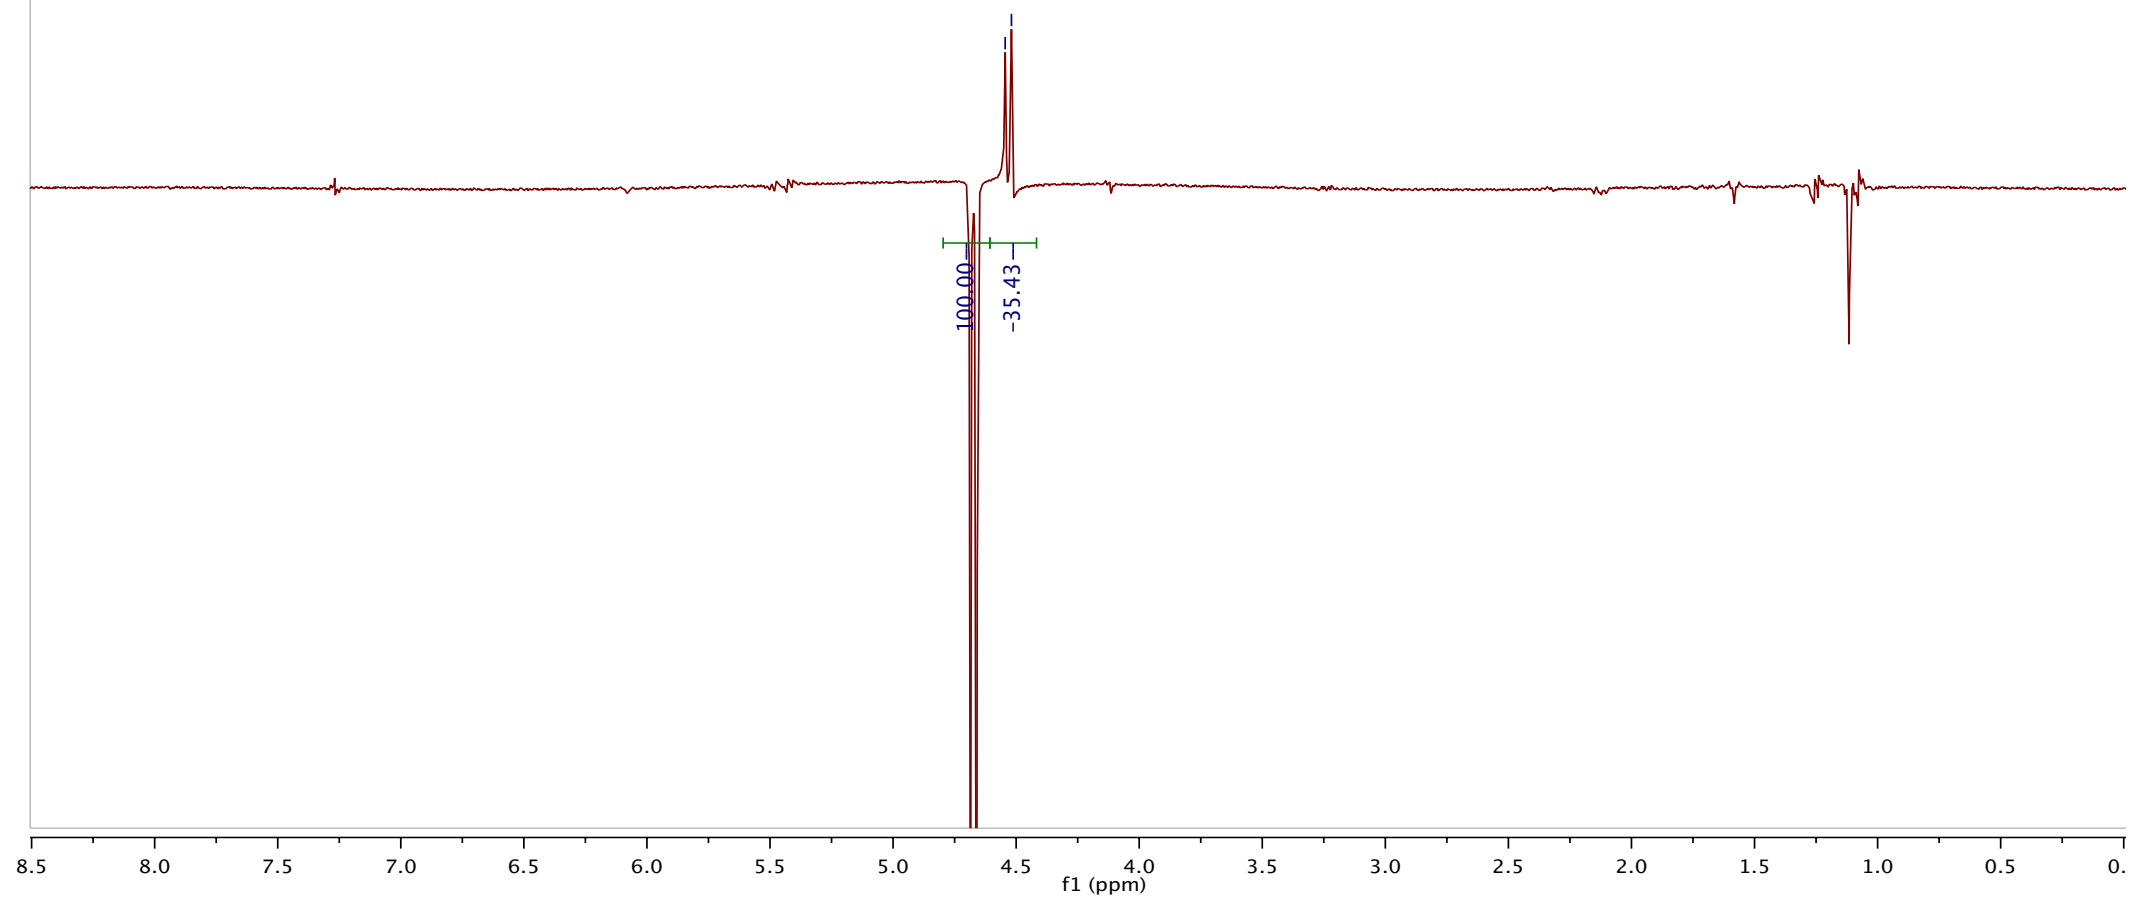

| Parameter              | Value                       |
|------------------------|-----------------------------|
| Title                  | AKM-03-32-CYCLENONE-4.45PPM |
| Spectrometer           | inova                       |
| Solvent                | CDCl3                       |
| Temperature            | 25.0                        |
| Number of Scans        | 64                          |
| Relaxation Delay       | 7.2500                      |
| Acquisition Date       | 2014-08-06T00:11:00         |
| Spectrometer Frequency | 499.86                      |

4.686  
4.660  
4.544  
4.541  
4.519  
4.516

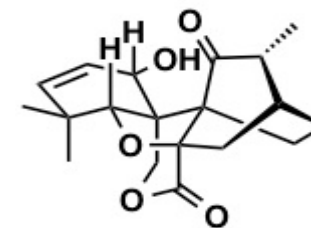

S21

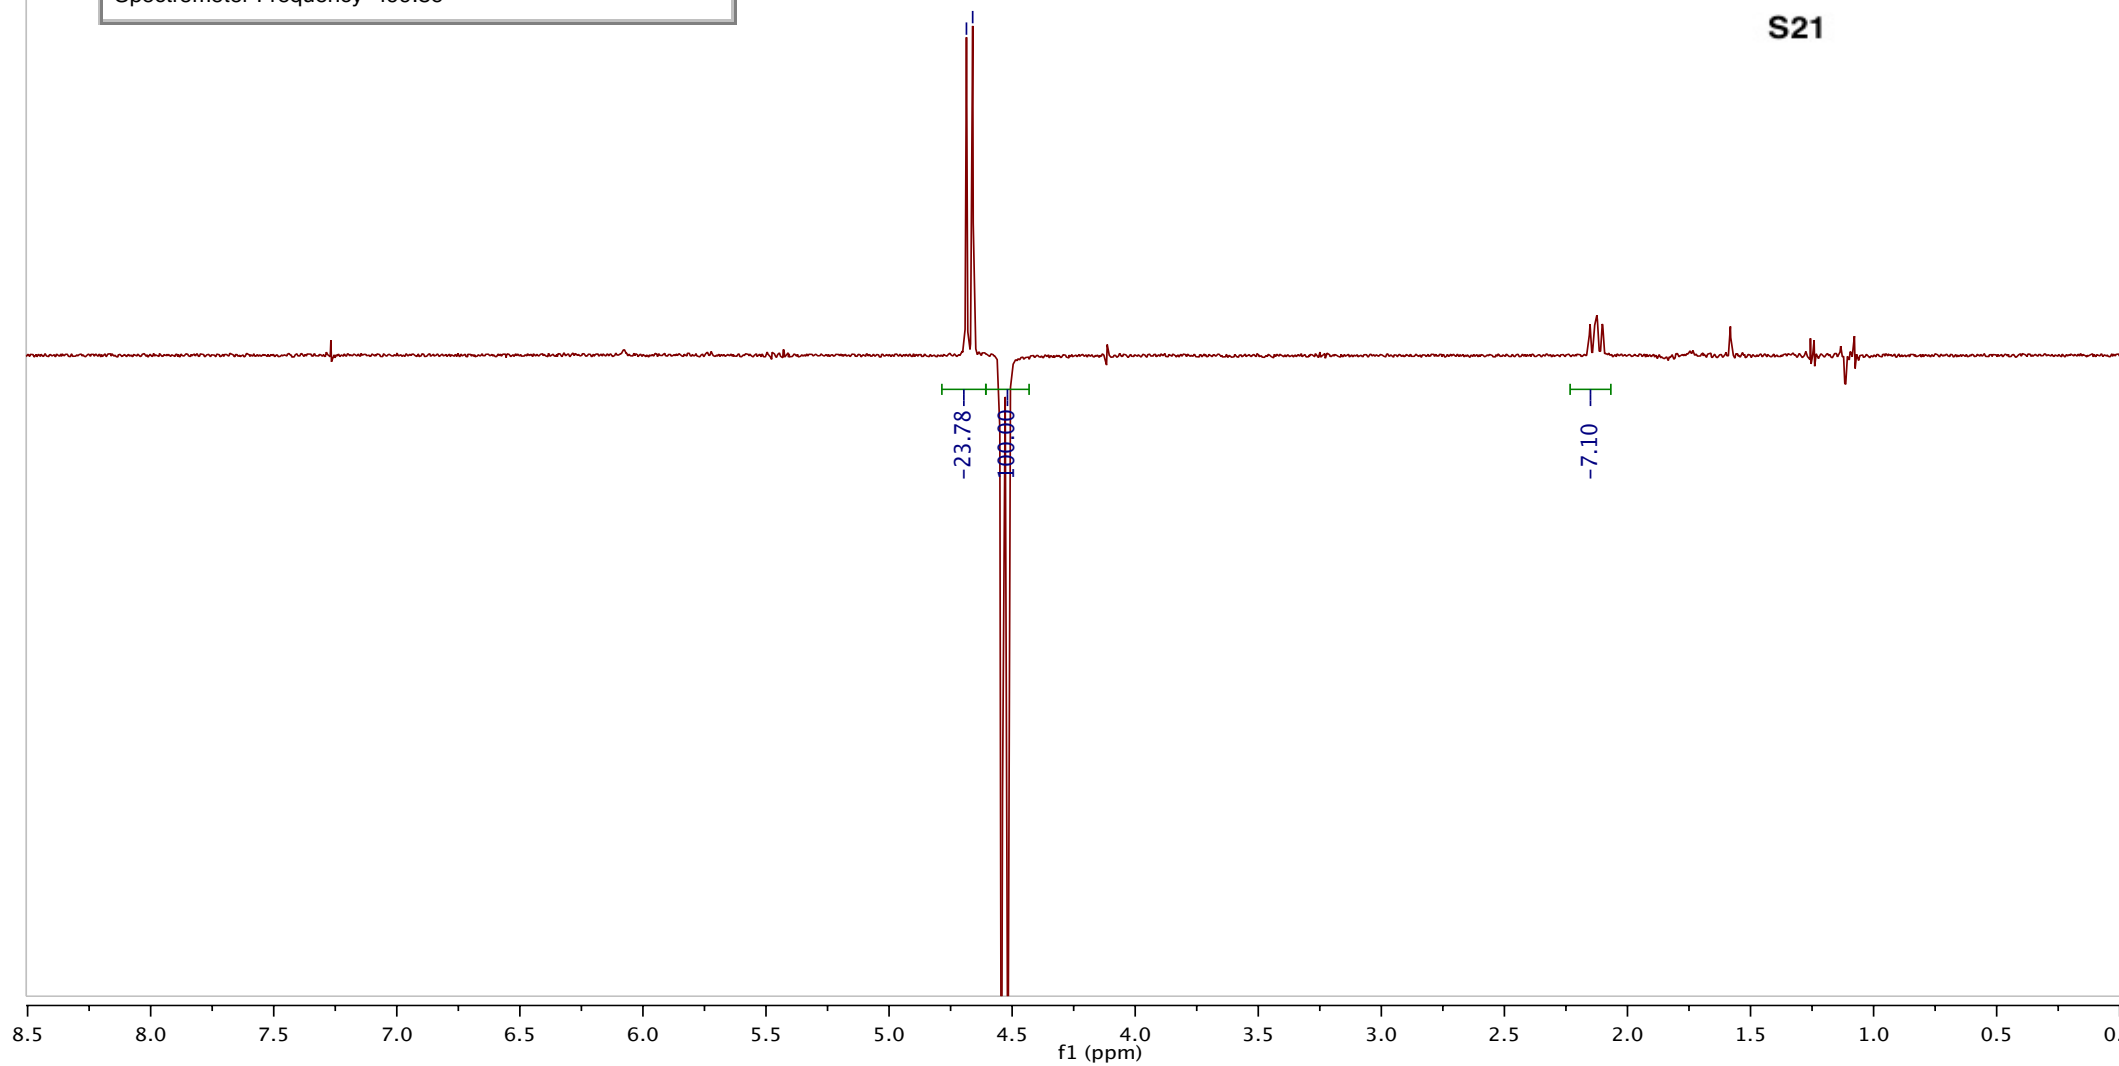

| Parameter              | Value                       |
|------------------------|-----------------------------|
| Title                  | AKM-03-32-CYCLENONE-2.25PPM |
| Spectrometer           | inova                       |
| Solvent                | CDCl3                       |
| Temperature            | 25.0                        |
| Number of Scans        | 32                          |
| Relaxation Delay       | 7.2500                      |
| Acquisition Date       | 2014-08-06T01:16:13         |
| Spectrometer Frequency | 499.86                      |

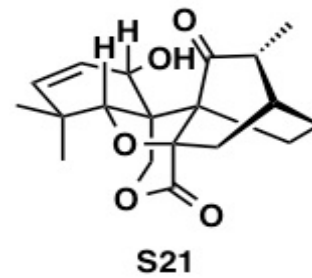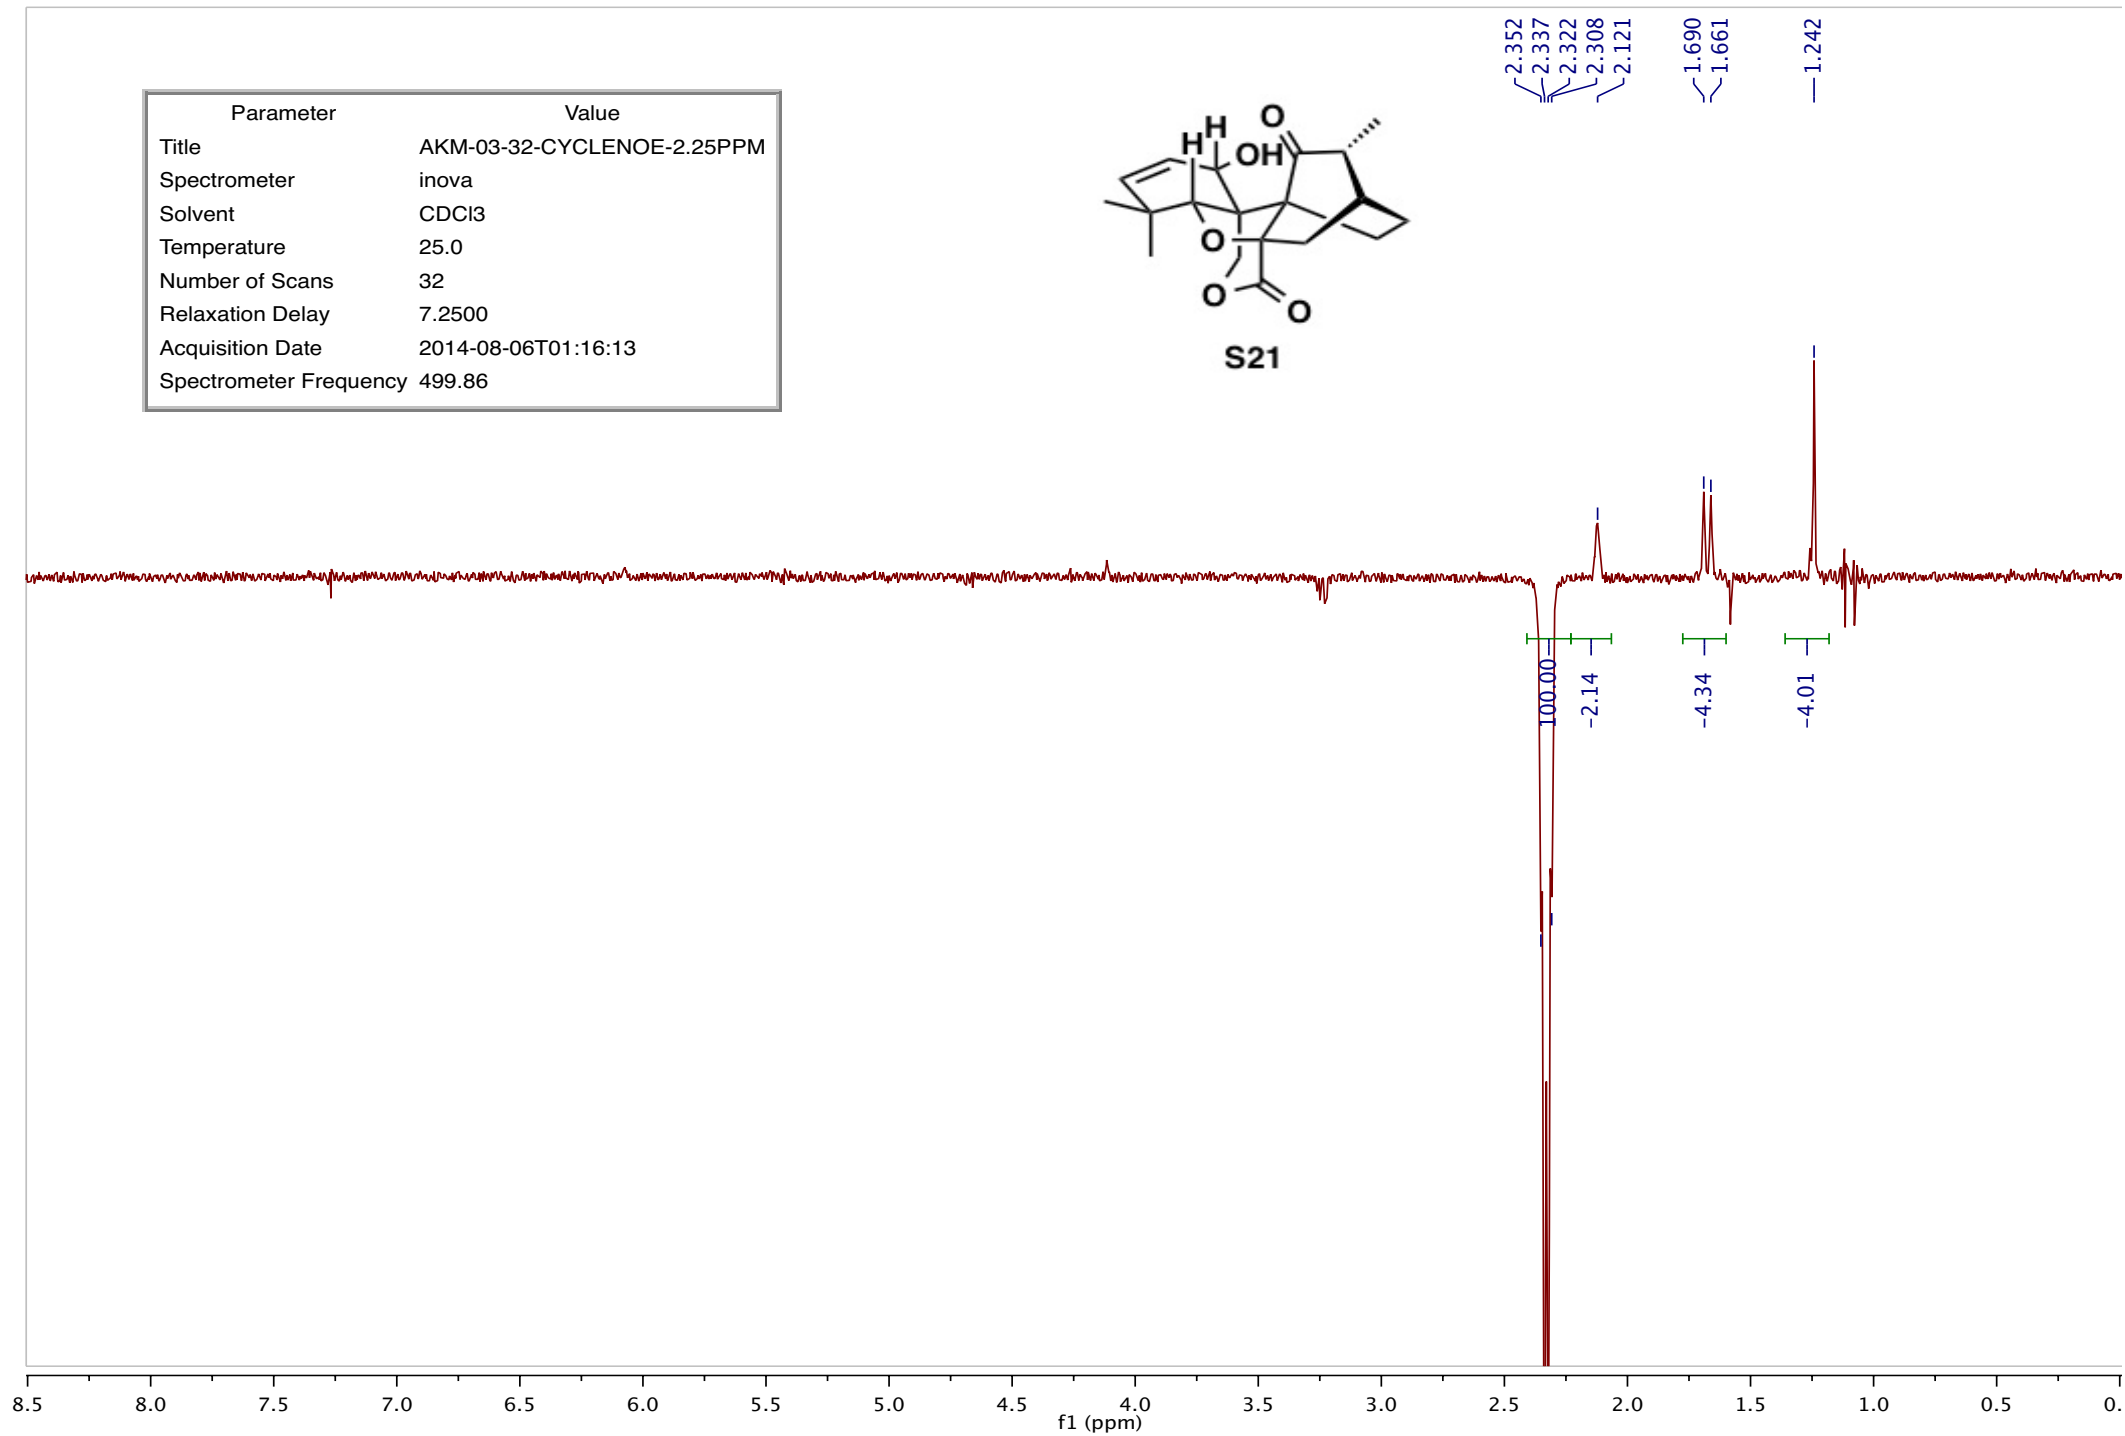

| Parameter              | Value                       |
|------------------------|-----------------------------|
| Title                  | AKM-03-32-CYCLENONE-2.05PPM |
| Spectrometer           | inova                       |
| Solvent                | CDCl3                       |
| Temperature            | 25.0                        |
| Number of Scans        | 32                          |
| Relaxation Delay       | 7.2500                      |
| Acquisition Date       | 2014-08-06T01:27:42         |
| Spectrometer Frequency | 499.86                      |

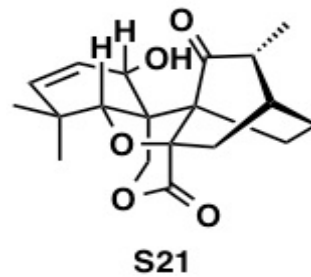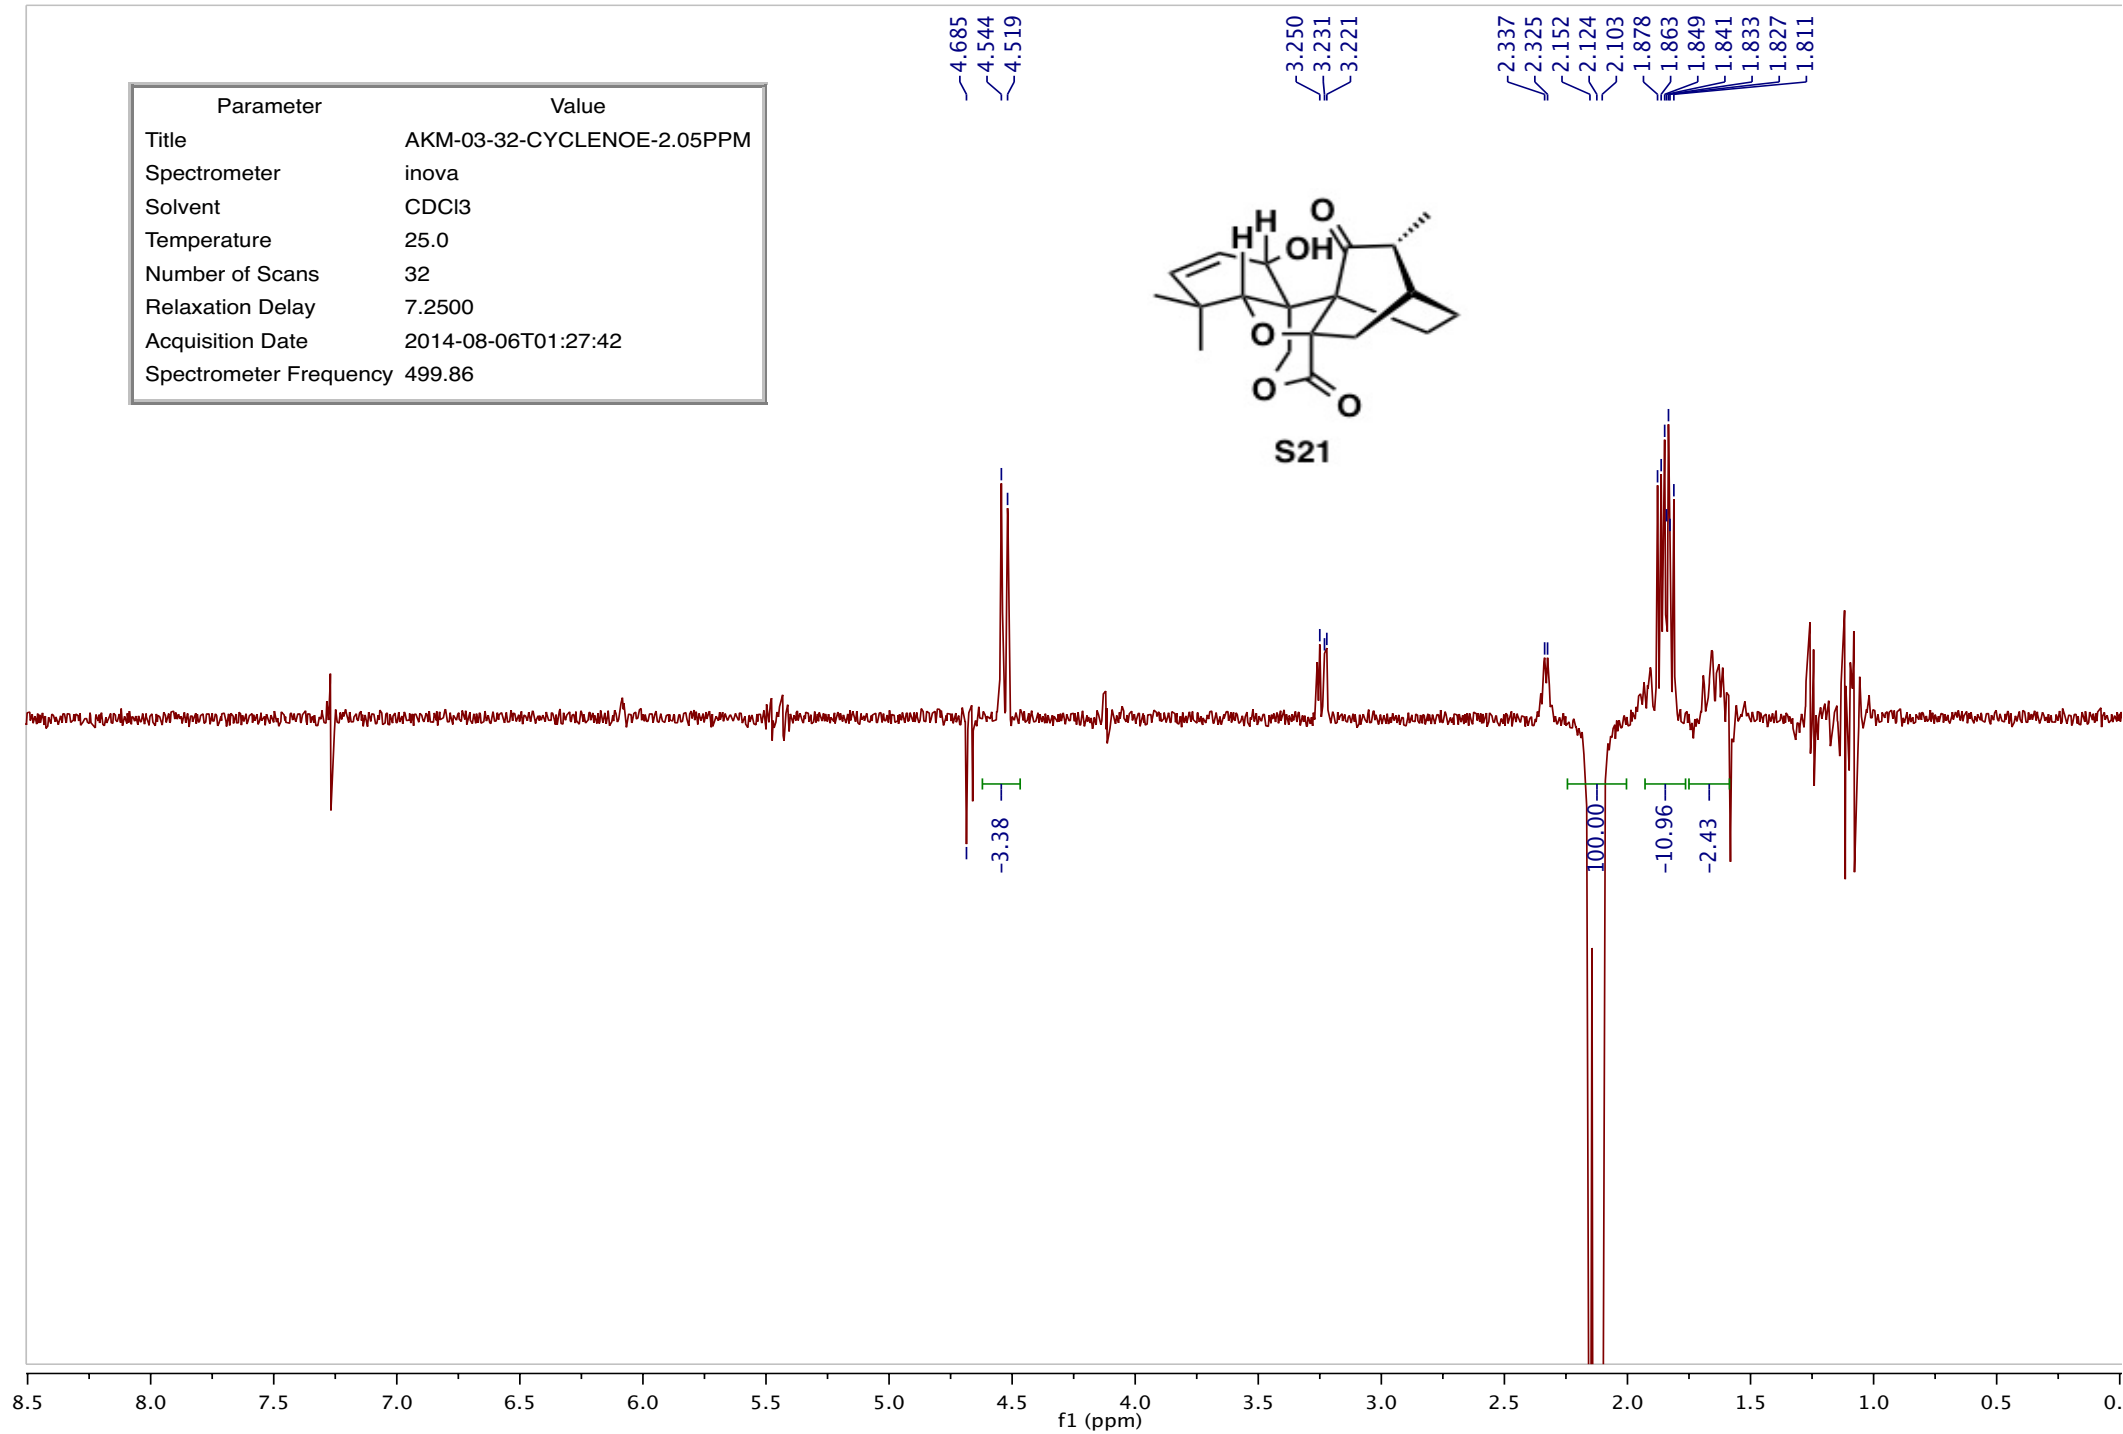

| Parameter              | Value                       |
|------------------------|-----------------------------|
| Title                  | AKM-03-32-CYCLENONE-1.86PPM |
| Spectrometer           | inova                       |
| Solvent                | CDCl3                       |
| Temperature            | 25.0                        |
| Number of Scans        | 32                          |
| Relaxation Delay       | 7.2500                      |
| Acquisition Date       | 2014-08-06T01:39:48         |
| Spectrometer Frequency | 499.86                      |

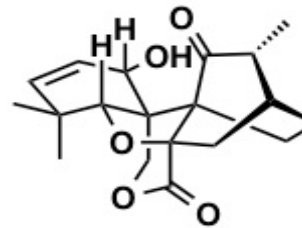

2.125  
1.958  
1.936  
1.932  
1.909  
1.877  
1.677  
1.650  
1.633  
1.613  
1.582  
1.256  
1.241

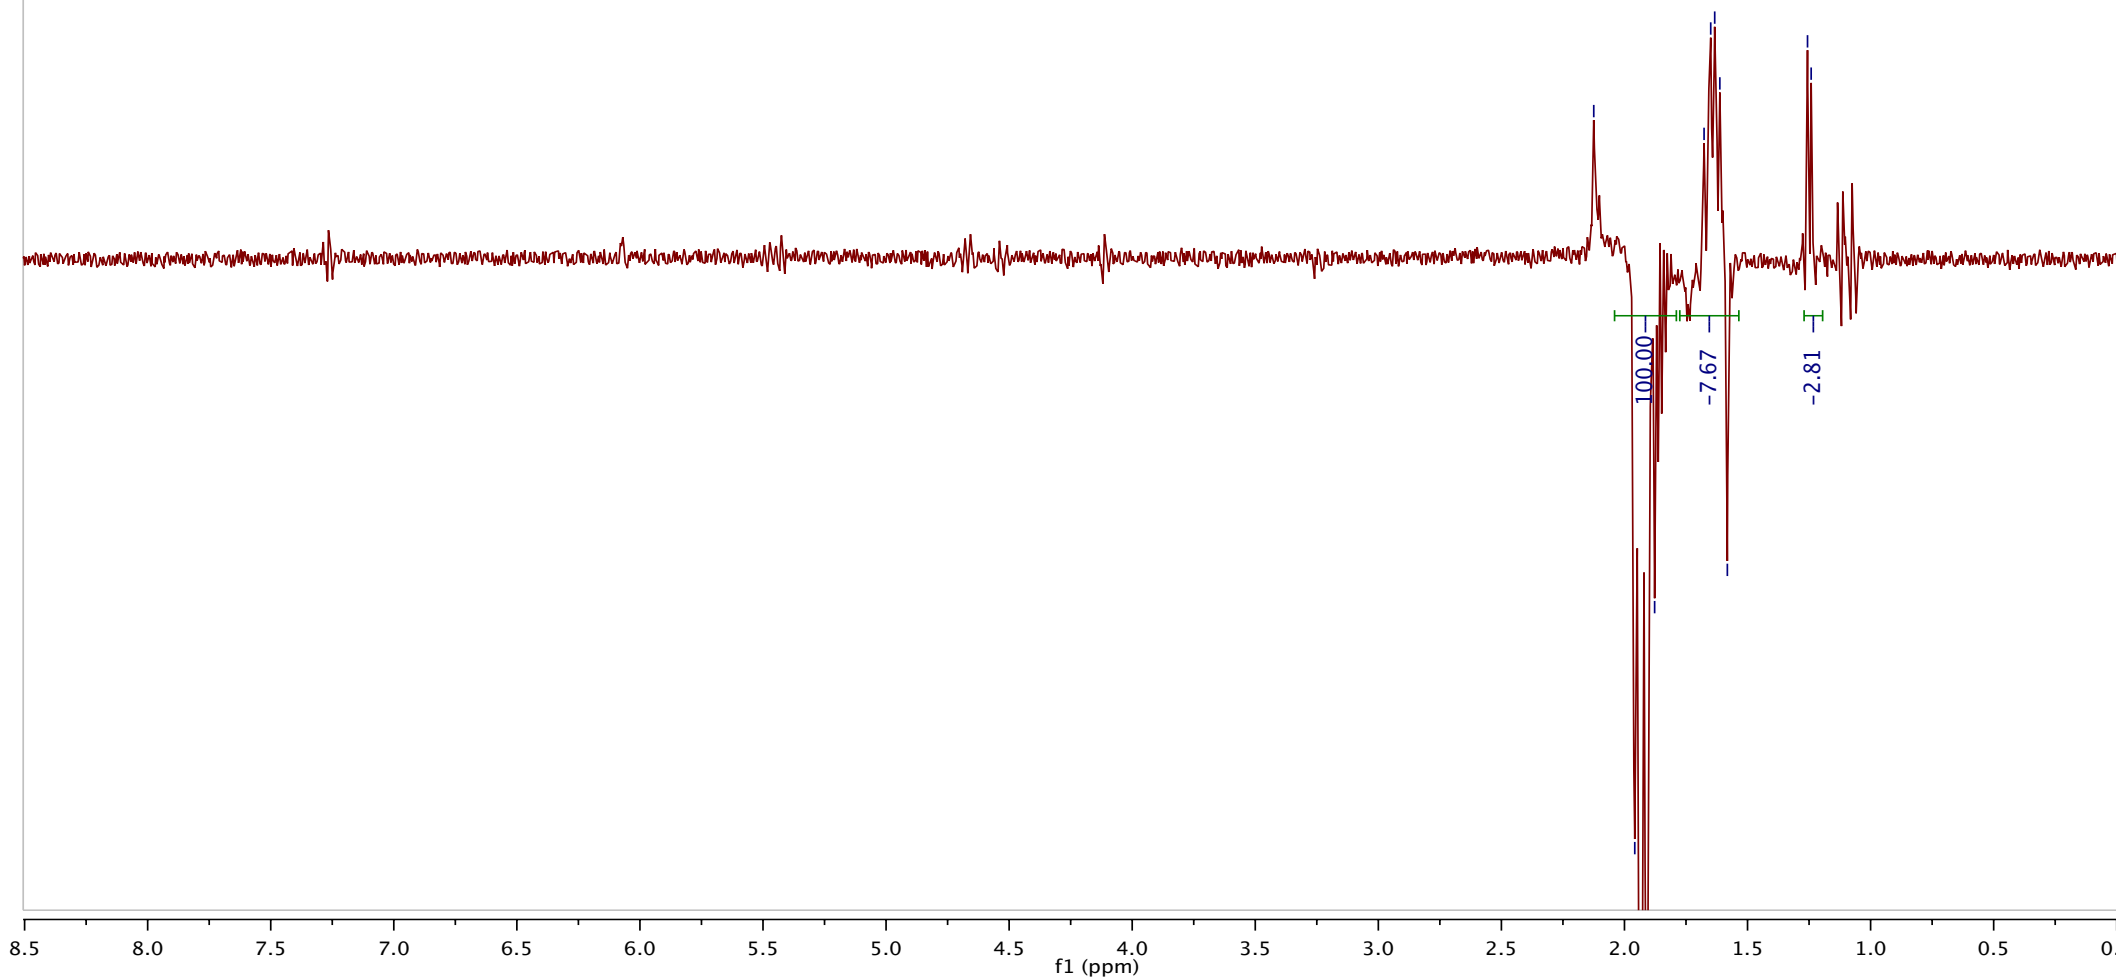

| Parameter              | Value                       |
|------------------------|-----------------------------|
| Title                  | AKM-03-32-CYCLENONE-1.77PPM |
| Spectrometer           | inova                       |
| Solvent                | CDCl3                       |
| Temperature            | 25.0                        |
| Number of Scans        | 32                          |
| Relaxation Delay       | 7.2500                      |
| Acquisition Date       | 2014-08-06T01:51:57         |
| Spectrometer Frequency | 499.86                      |

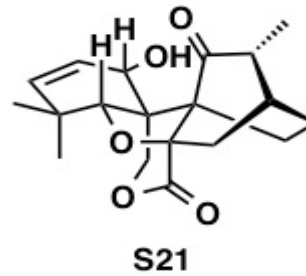

2.132  
2.123  
2.101  
1.878  
1.863  
1.856  
1.849  
1.841  
1.833  
1.827  
1.812

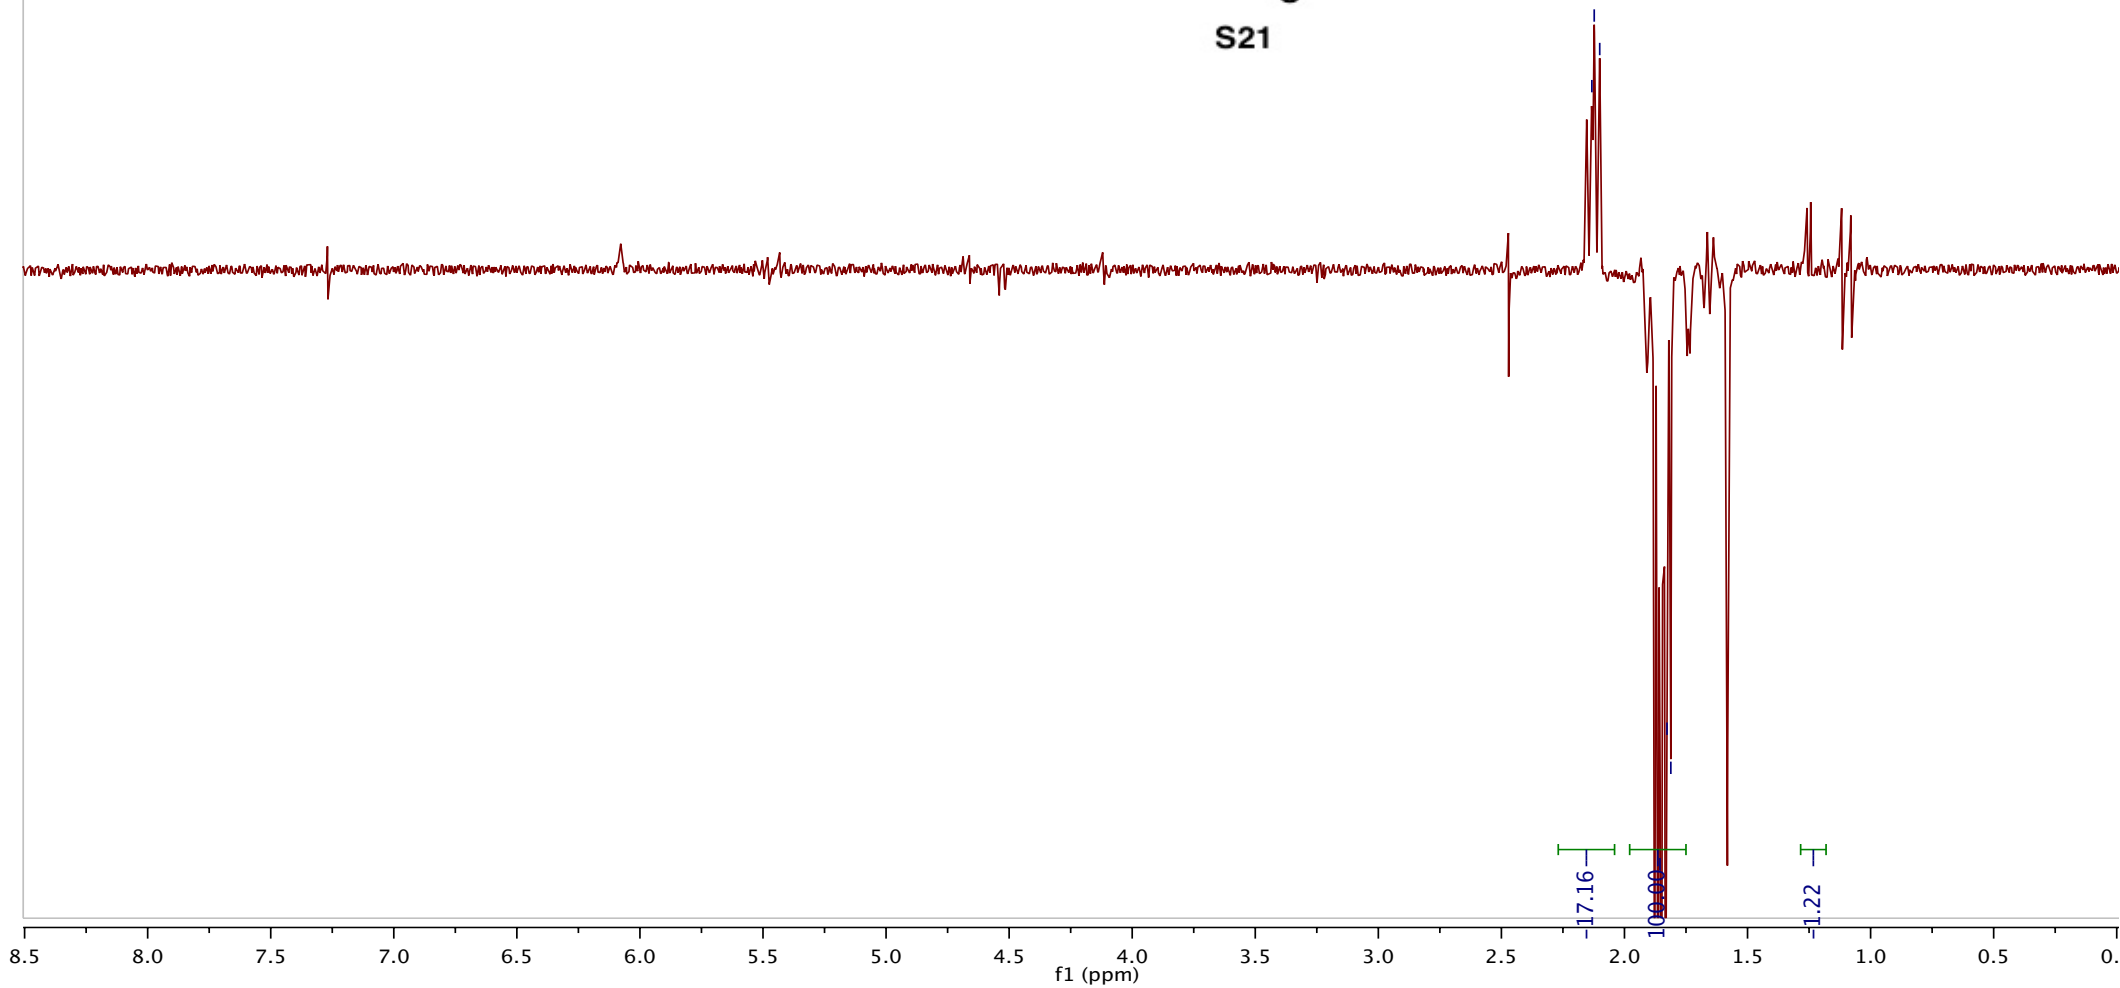



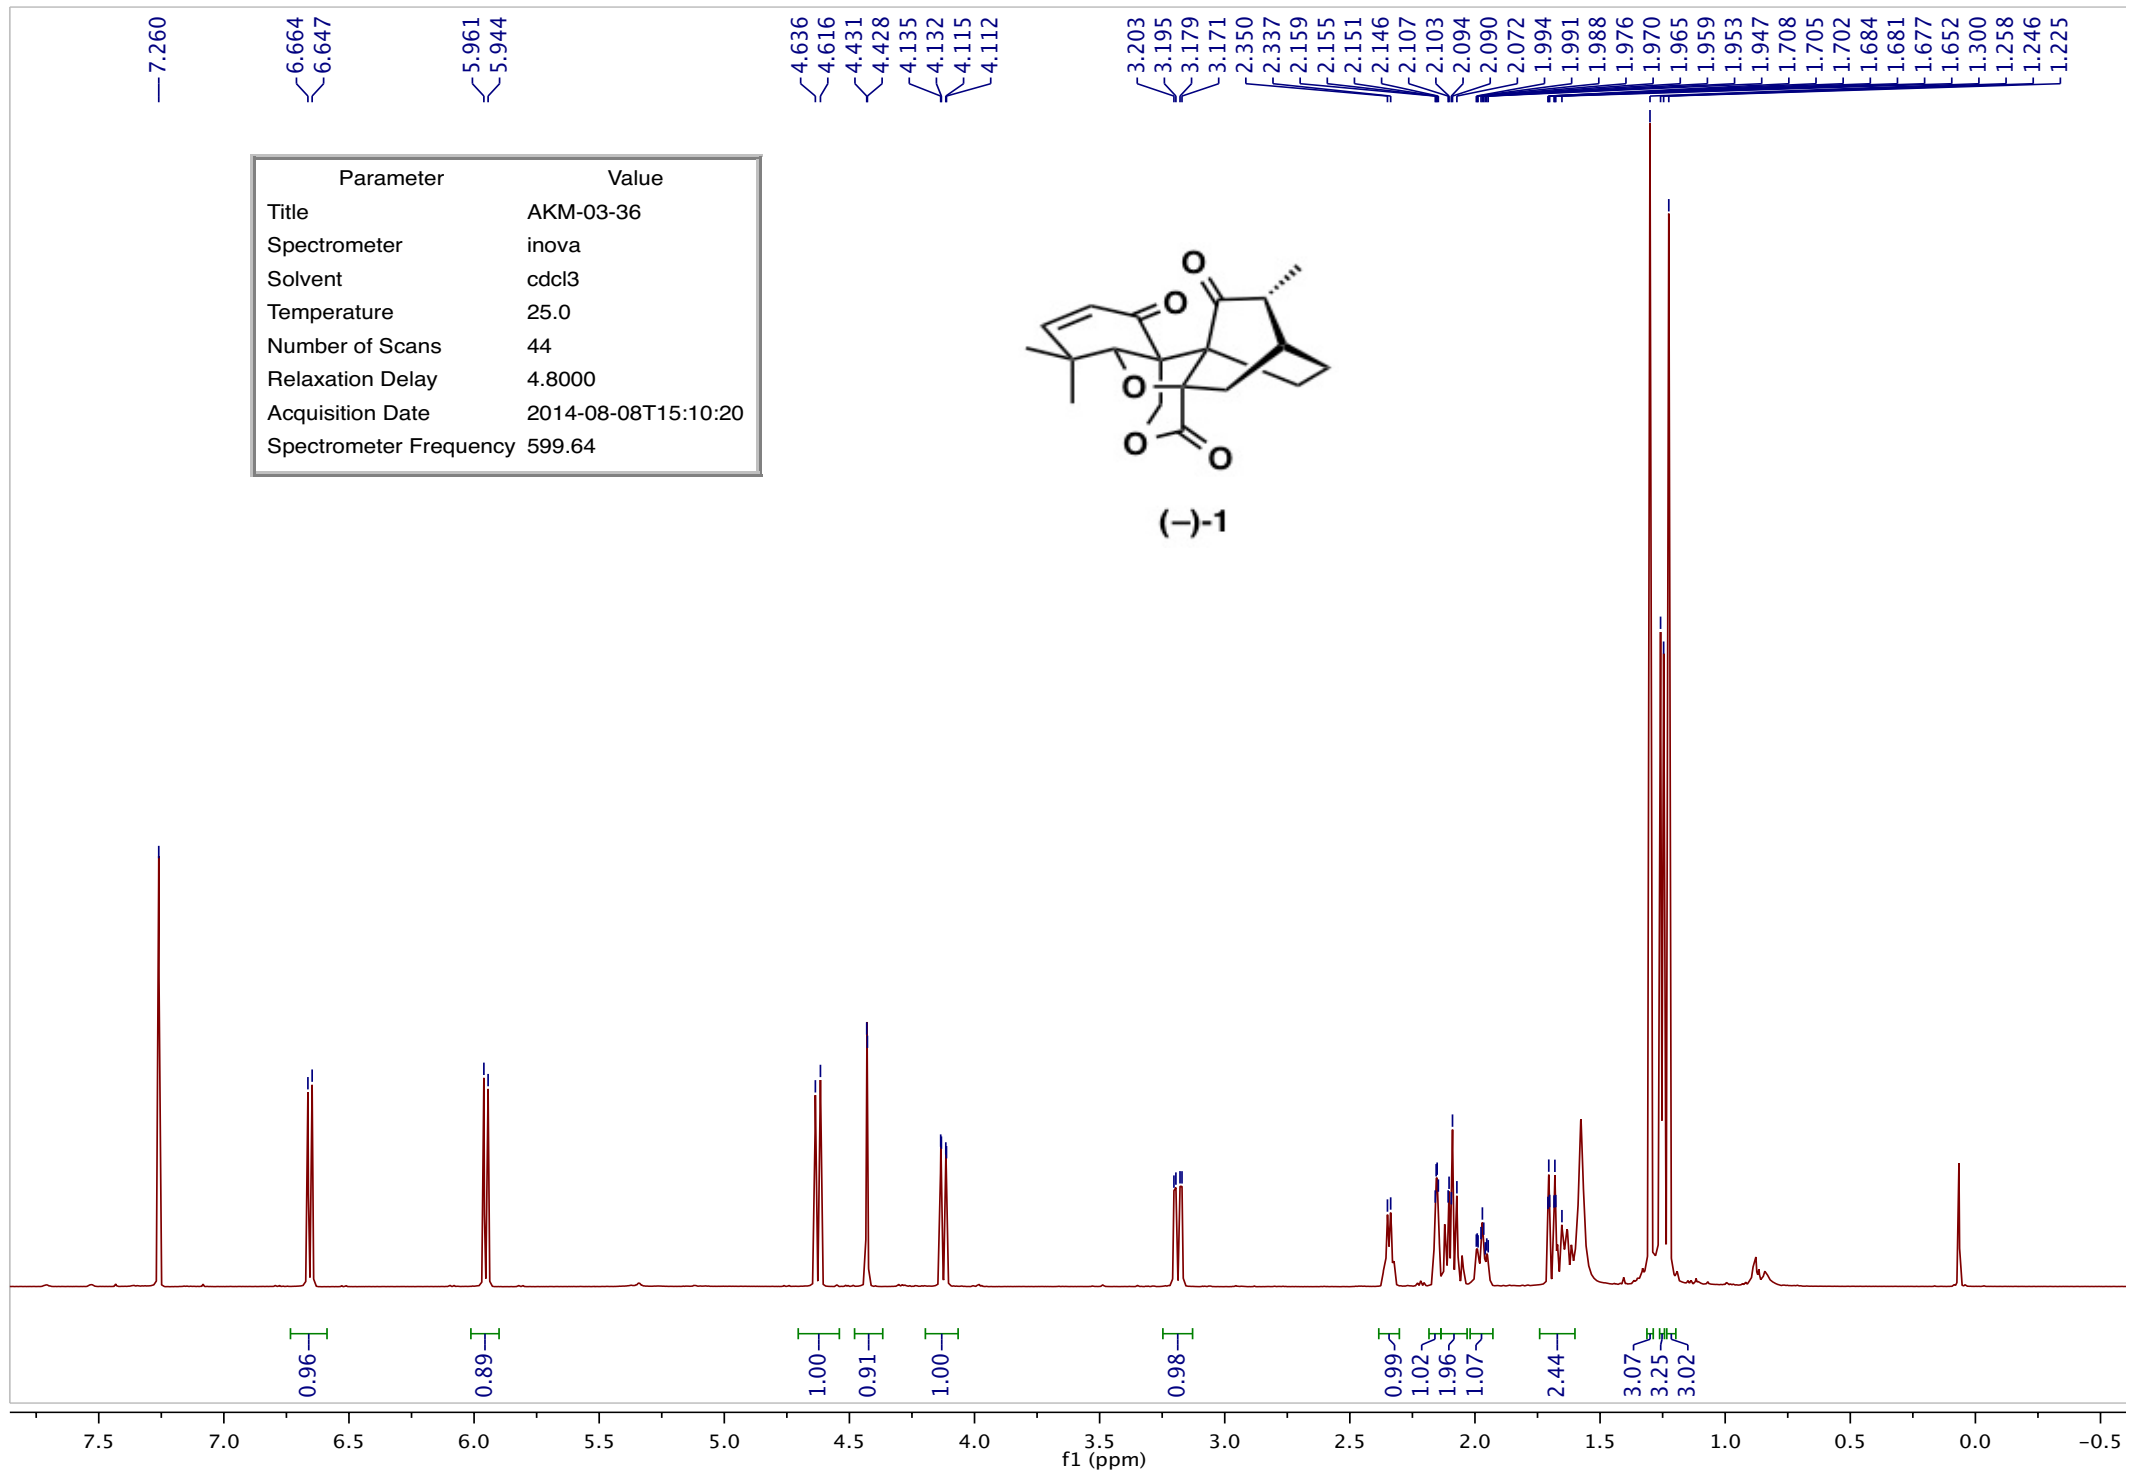

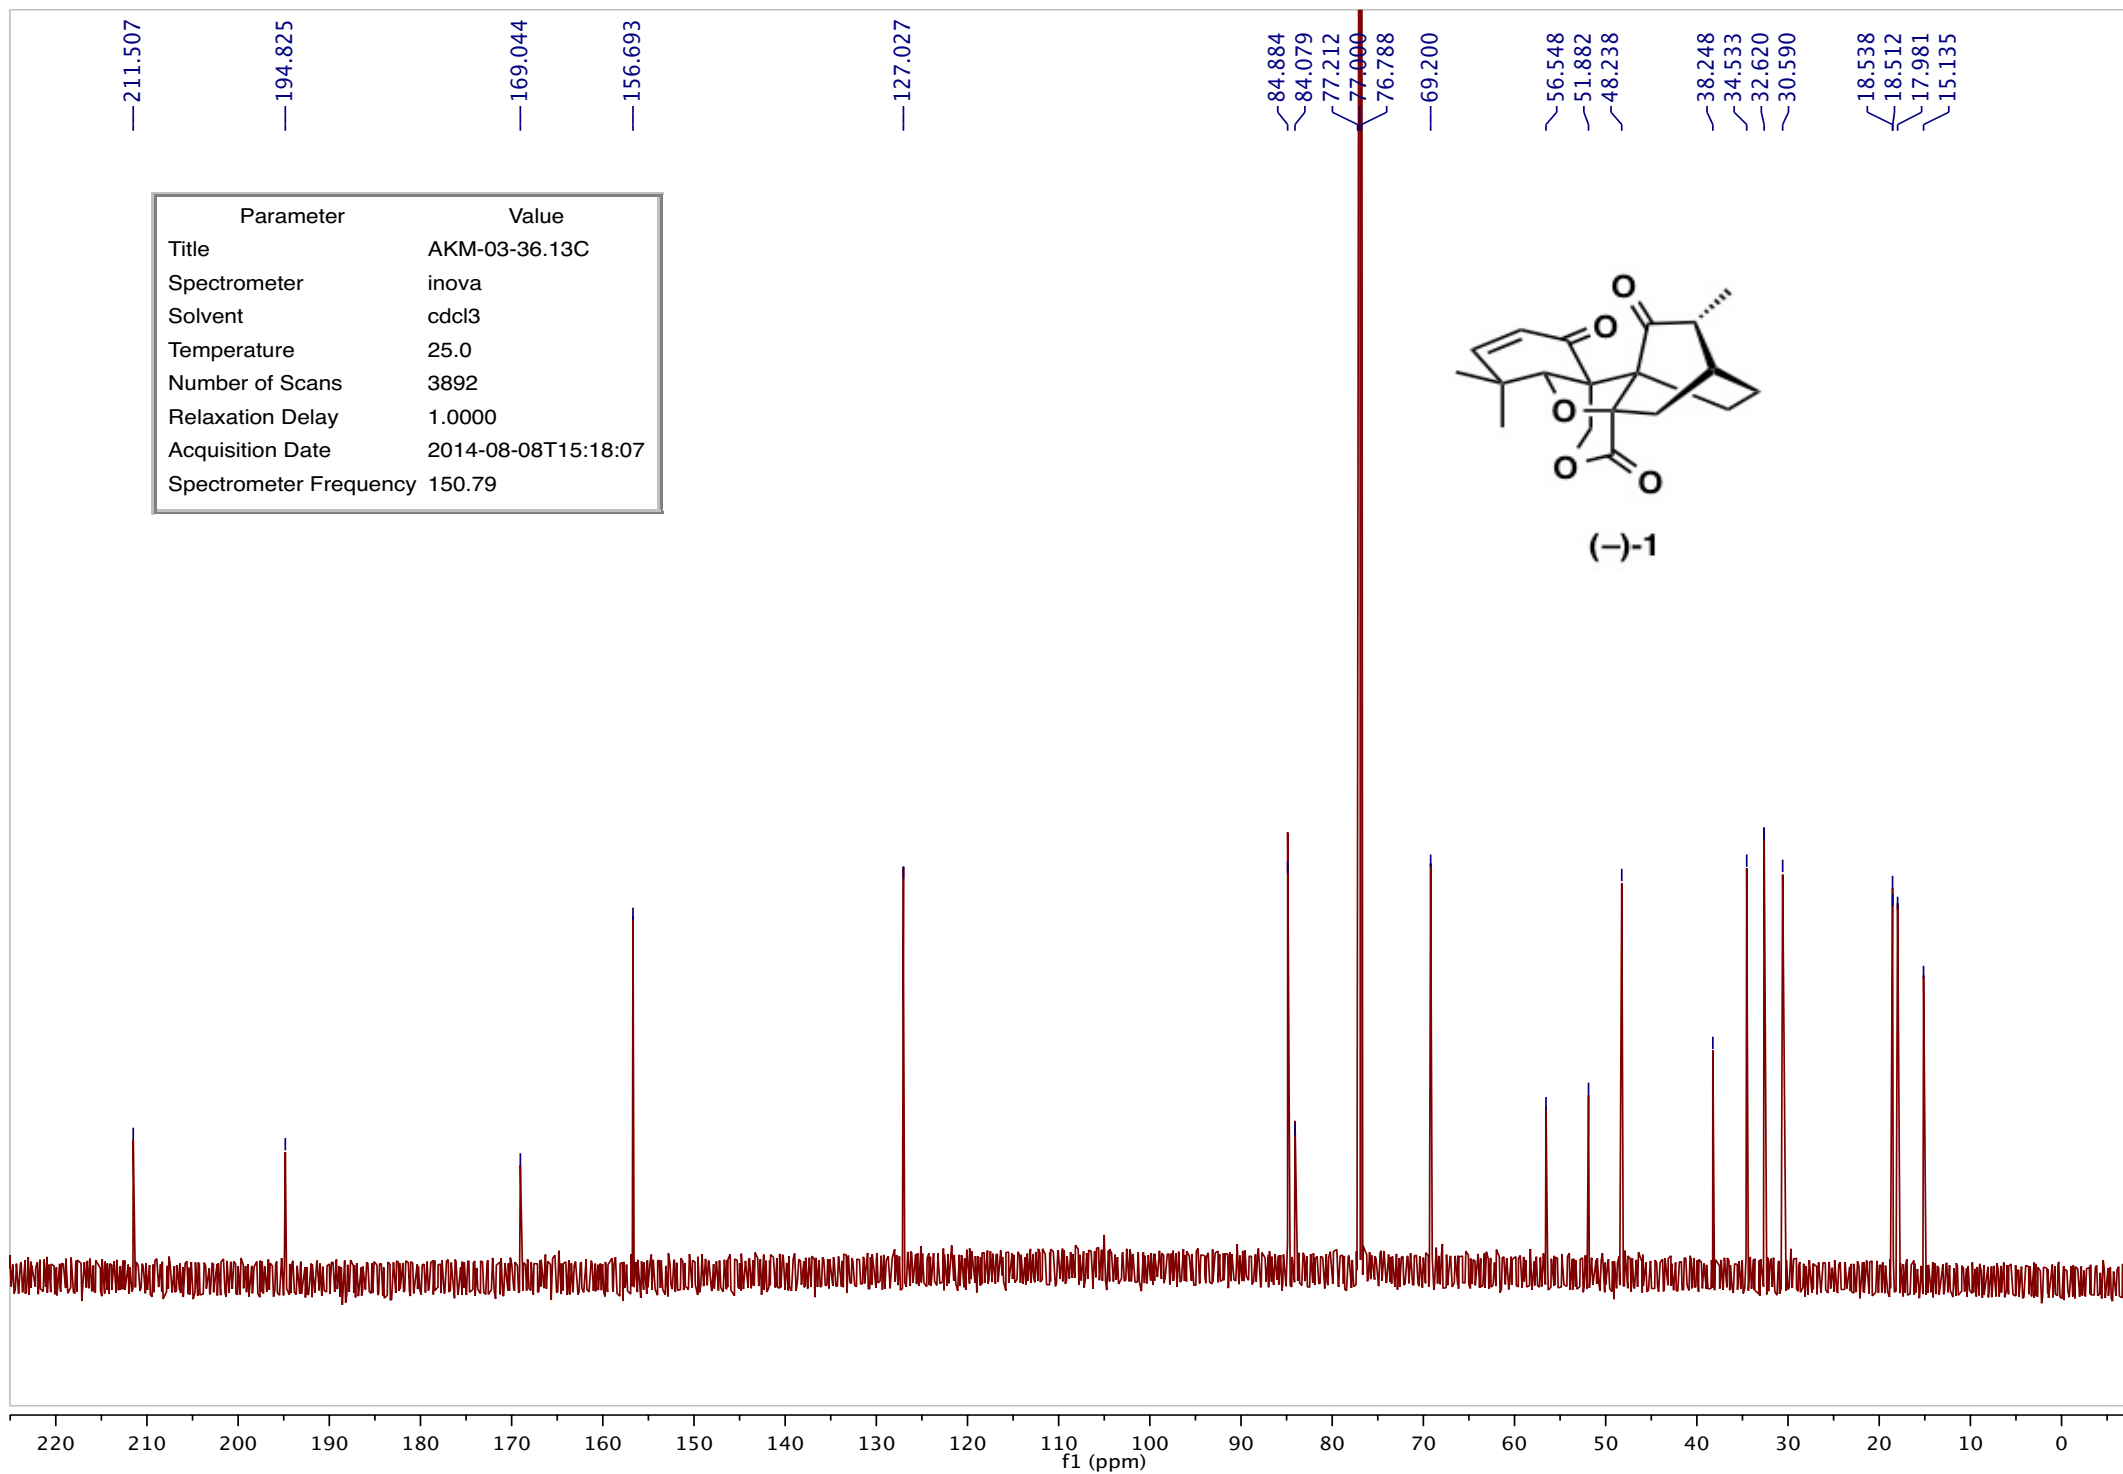

Supplement: ja510573v_si_002.pdf [file ja510573v_si_002.pdf]
